# Supplementary material for: Structure, isomerization and dimerization processes of naringenin flavonoids
Source: Royal Society of Chemistry journal article supplement (doi:10.1039/d1cp01161h), 2021-01-01
Supplement: d1cp01161h1.pdf [file d1cp01161h1.pdf]

## Structure, isomerization and dimerization processes of narigenin flavonoids

Ana González Moreno,<sup>a\*</sup> Pilar Prieto,<sup>b</sup> M. Carmen Ruiz–Delgado,<sup>c</sup> Eva Domínguez,<sup>d</sup> Antonio Heredia,<sup>a\*</sup> and Abel de Cózar<sup>e,f\*</sup>

a: A. González Moreno, Prof. Dr. A. Heredia

IHSM-UMA-CSIC La Mayora, Departamento de Biología Molecular y Bioquímica, Universidad de Málaga (UMA), 29071, Málaga, Spain, e-mail: [heredia@uma.es](mailto:heredia@uma.es)  
[gonzalezana@uma.es](mailto:gonzalezana@uma.es)

b: Prof. Dr. P. Prieto

Departamento de Química Inorgánica, Orgánica y Bioquímica, Facultad de Química, Universidad de Castilla la Mancha–IRICA (UCLM), 13071, Ciudad Real, Spain

c: Prof. Dr. M. C. Ruiz–Delgado

Departamento de Química Física, Universidad de Málaga (UMA), 29071, Málaga, Spain

d: Dr. E. Domínguez

IHSM-UMA-CSIC La Mayora, Plant breeding and Biotechnology, CSIC, 29750 Algarrobo-Costa, Málaga, Spain

e: Dr. A. de Cózar

Departamento de Química Orgánica I, Facultad de Química, Universidad del País Vasco (UPV/EHU) and Donostia International Physics Center (DIPC), 1072, E–20018, San Sebastián–Donostia, Spain, e-mail: [abel.decozar@ehu.es](mailto:abel.decozar@ehu.es)

f: Dr. A. de Cózar

IKERBASQUE, Basque Foundation for Science, 48009, Bilbao, Spain

## Content

**Figure S1.** Top and lateral views of (A) naringenin chalcone (**1**) and (B) naringenin (**2**) structures computed at B3LYP(PCM=octanol)/6-31+G(d,p) level.

**S4**

**Figure S2.** Main relevant (A,B) bond distances (Å) and (C,D) dihedral angles (deg) of naringenin chalcone (**1**) and naringenin (**2**). Values in black and blue were computed at B3LYP/6-31+G(d,p) and B3LYP(PCM,*n*-octanol)/6-31+G(d,p) levels, respectively.

**S4**

**Figure S3.** Superposition of (A) naringenin chalcone (**1**) and (B) naringenin (**2**) structures computed at B3LYP/6-31+G(d,p) (in green) and B3LYP(PCM=octanol)/6-31+G(d,p) (in blue) level. Naringenin X-ray structure (taken from ref. [30]) is represented with grey carbon, red oxygen and white hydrogen atoms and was used as reference for computing the RMDS.

**S4**

**More details about electronic and molecular structure of naringenin chalcone (1) and naringenin (2)**

**S5**

**Table S1.** Theoretical absorption bands (in nm) calculated at B3LYP(PCM,*n*-octanol)/6-31+G(d,p), ωb97xd(PCM,*n*-octanol)/6-31+G(d,p) and M06HF(PCM,*n*-octanol)/6-31+G(d,p) levels. Experimental values are included for comparison.

**S5**

**Table S2.** Raman band assignment of the naringenin chalcone and naringenin spectra computed at B3LYP/6-31+G(d,p) level.

**S6**

**Figure S4.** Electrostatic potential (ESP) surface of 0.03 a.u. electron density of naringenin chalcone (**1**) and naringenin (**2**) computed at B3LYP/6-31+G(d,p) level.

**S7**

**Evaluation of H–bond network on the cyclization step.**

**S7**

**Figure S5.** Main geometrical features and relative activation (Gibbs) energies of all transition structures associated with the cyclization of INT1 considering *n*=1–7 explicit water molecules. See Fig. 6 caption for further details.

**S10**

**Figure S6.** Numeration for naringenin dimers included in **Table S3**.

**S11**

**Table S3.** Comparison between intermolecular interactions computed within different DFT levels of theory and these obtained by X-ray from naringenin cluster (taken from ref.[30] in the main text). Atom numbers are described in Figure S3.

**S11**

**Figure S7.** Main geometrical features of all (X,Y) dimers computed at ωB97XD(PCM, *n*-octanol)/6-31+G(d,p) level.

**S12**

**Table S4.** Total electronic energies (*E*, in a.u.), zero point correction of the energy (ZPCE), thermal corrections to Gibbs free energies (TCGFE, in a.u.),

and number of imaginary frequencies (NIMAG) of **1** and **2** discussed in the main text. **S13**

**Table S5.** Total electronic energies (E, in a.u.), zero point correction of the energy (ZPCE), thermal corrections to Gibbs free energies (TCGFE, in a.u.), and number of imaginary frequencies (NIMAG) of the cyclization reaction of INT1 in gas phase discussed in the main text. **S13**

**Table S6.** Total electronic energies (E, in a.u.), zero point correction of the energy (ZPCE), thermal corrections to Gibbs free energies (TCGFE, in a.u.), and number of imaginary frequencies (NIMAG) of the cyclization reaction of INT1 in octanol. **S13**

**Table S7.** Total electronic energies (E, in a.u.), zero point correction of the energy (ZPCE), thermal corrections to Gibbs free energies (TCGFE, in a.u.), and number of imaginary frequencies (NIMAG) of the cyclization reaction of **INT1** in water discussed in the main text. **S14**

**Table S8.** Total electronic energies (E, in a.u.), zero point correction of the energy (ZPCE), thermal corrections to Gibbs free energies (TCGFE, in a.u.), and number of imaginary frequencies (NIMAG) of **1** and **2** the aggregation analysis discussed in the main text. **S17**

Cartesian coordinates **S18**

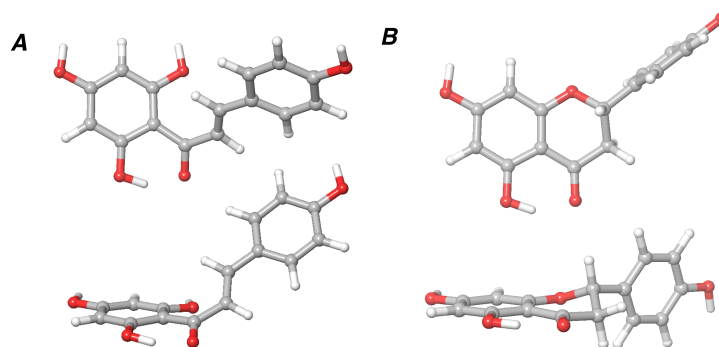

**Figure S1.** Top and lateral views of (A) naringenin chalcone (**1**) and (B) naringenin (**2**) structures computed at B3LYP(PCM=octanol)/6-31+G(d,p) level.

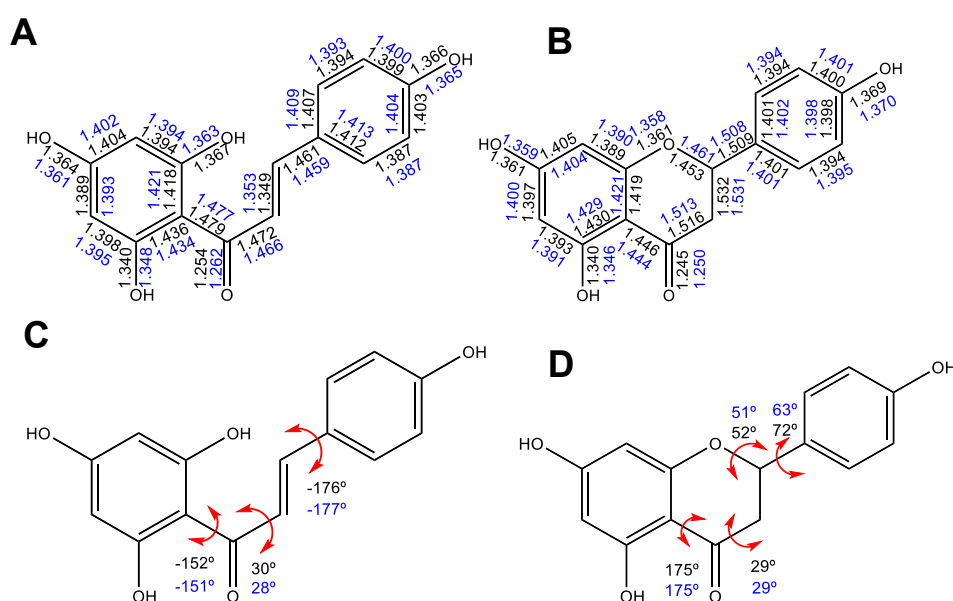

**Figure S2.** Main relevant (A,B) bond distances (Å) and (C,D) dihedral angles (deg) of naringenin chalcone (**1**) and naringenin (**2**). Values in black and blue were computed at B3LYP/6-31+G(d,p) and B3LYP(PCM,*n*-octanol)/6-31+G(d,p) levels, respectively.

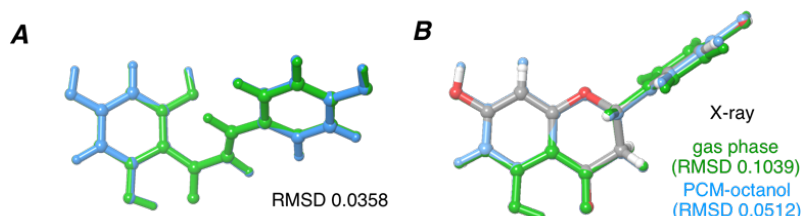

**Figure S3.** Superposition of (A) naringenin chalcone (**1**) and (B) naringenin (**2**) structures computed at B3LYP/6-31+G(d,p) (in green) and B3LYP(PCM=octanol)/6-31+G(d,p) (in blue) level. Naringenin X-ray structure (taken from ref.[30]) is represented with grey carbon, red oxygen and white hydrogen atoms and was used as reference for computing the RMDS.



### More details about electronic and molecular structure of naringenin chalcone (1) and naringenin (2)

The higher conjugation of naringenin chalcone (1) in comparison to naringenin (2) skeleton leads to a longer carbonyl bond and a shorter C1'-C2 bond distance (see Fig.S2).

In naringenin (2) spectra (Fig. 3B) a weak lowest-energy absorption band at 336 nm was shown, being associated to a HOMO→LUMO one-electron excitation (S0→S1 transition); although both HOMO and LUMO electron density is mainly localized on the A and C rings, a slight delocalization over the B ring is also found for HOMO which also implies a small intramolecular charge-transfer character for this transition.

The smaller value of HOMO–LUMO gap of naringenin chalcone (1) rather than the computed to naringenin (2) is caused by an increase in electron donor and electron acceptor nature, which is reflected by the destabilization of HOMO and stabilization of LUMO orbitals in 1 when compared with 2. In fact, the HOMO–LUMO transition of naringenin chalcone implies an intramolecular charge transfer character as mentioned in the main manuscript.

**Table S1.** Theoretical absorption bands (in nm) calculated at B3LYP(PCM,*n*-octanol)/6-31+G(d,p), ωb97xd(PCM,*n*-octanol)/6-31+G(d,p) and M06HF(PCM,*n*-octanol)/6-31+G(d,p) levels. Experimental values are included for comparison.

| <b>Naringenin chalcone</b> |               |              |                     |
|----------------------------|---------------|--------------|---------------------|
| <b>B3LYP</b>               | <b>ωb97xd</b> | <b>M06HF</b> | <b>Experimental</b> |
| 373.7                      | 320.3         | 289.7        | 371                 |
| 246.7                      | 213.5         | 206.5        | 247                 |
| 212.1                      | 197.3         | 200.0        | 214                 |
| 205.4                      | 189.1         | 183.3        | 204                 |
| <b>Naringenin</b>          |               |              |                     |
| 326.4                      | 288.2         | 261.7        | 336                 |
| 276.6                      | 259.6         | 249.2        | 292                 |
| 221.7                      | 207.7         | 197.6        | 229                 |
| 210.1                      | 183.0         | 182.6        | 214                 |

**Table S2.** Raman band assignment of the naringenin chalcone and naringenin spectra computed at B3LYP/6-31+G(d,p) level.

| Naringenin chalcone                           |                                                |                                                                                                                          |              |
|-----------------------------------------------|------------------------------------------------|--------------------------------------------------------------------------------------------------------------------------|--------------|
| Theoretical $\tilde{\nu}$ (cm <sup>-1</sup> ) | Experimental $\tilde{\nu}$ (cm <sup>-1</sup> ) | Assignment                                                                                                               | Eigenvectors |
| 1555                                          | 1567                                           | C=O stretching + in-plane O-H bending (H bonding)                                                                        |              |
| 1563                                          | 1588                                           | C-C stretching of ring B (vibrational <b>mode 8b</b> ) + in-plane C-H bending                                            |              |
| 1592                                          | 1607                                           | C-C stretching of ring B (vibrational <b>mode 8a</b> ) coupled with vinyl C-C stretching + in-plane C-H bending          |              |
| 1624                                          | 1625                                           | C-C stretching of vinyl group coupled with in-plane O-H bending (H bonding), C=O stretching and C-C stretching of ring A |              |
| Naringenin                                    |                                                |                                                                                                                          |              |
| Theoretical $\tilde{\nu}$ (cm <sup>-1</sup> ) | Experimental $\tilde{\nu}$ (cm <sup>-1</sup> ) | Assignment                                                                                                               | Eigenvectors |
| 1577                                          | 1592                                           | C-C stretching of ring B (vibration <b>mode 8b</b> ) + in-plane bending C-H                                              |              |
| 1601                                          | 1619                                           | C-C stretching of ring B (vibration <b>mode 8a</b> ) + in-plane C-H bending                                              |              |
| 1623                                          | 1636                                           | C=O stretching + in plane O-H bending (H bonding) + and C-C stretching of ring A                                         |              |

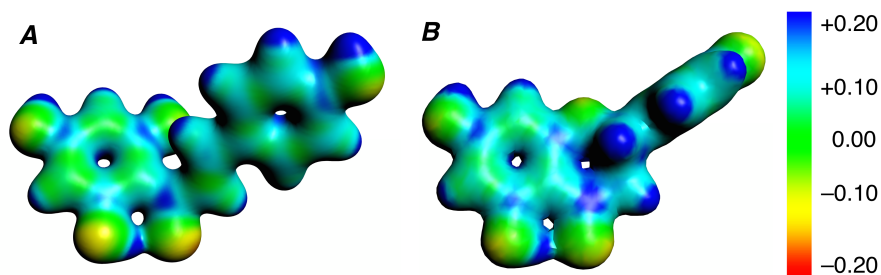

**Figure S4.** Electrostatic potential (ESP) surface of 0.03 a.u. electron density of naringenin chalcone (**1**) and naringenin (**2**) computed at B3LYP/6-31+G(d,p) level.

### Evaluation of H–bond network on the cyclization step.

The main geometrical features and relative activation (Gibbs) energies of all H–bonding networks obtained after (MM/MC) conformational search– Molecular Dynamic simulations are collected in Figure S5.

As far as one explicit molecule of water is considered in the calculations, the most stable compounds imply an H–bonding interaction with negatively charged O1, being *inplane* in **TS2-1w** and *out– of–plane* in **TS2-1wb**. Inclusion of a second water molecule creates a H–bonding network between OH–C7 and O1 that remains constant in the most stable systems including additional explicit water molecules. Remarkably, only **TS2-2w** can be found when considering two water molecules. In the case of 3 explicit water molecules, generation of a 3 water H–bonding network between OH–C7 and O1 implies an increase higher than 2 kcal mol<sup>-1</sup> in the activation Gibbs energy barrier (Energy difference between **TS2-3w** and **TS2-3wb**). This increase in the activation Gibbs energy is lower when a H–bonding interaction between rings A and B is considered (O1 – OH–C4' network, **TS2-3wc**).

Our calculations shown that fusion of the two water network observed in **TS2-2w** and the three water network of **TS2-3wc** onto a four water network forms the most stable transition structure (**TS2-4w**) where a four water H–bonding network that connects OH–C7 – O1 – OH–C4' is observed. Noteworthy, this network can be found in all transition structures with higher amount of water molecules. Changing the OH–C4' H–bonding acceptor character implies also an increase in the activation energy (**TS2-4wd**).

Increasing the amount of explicit water molecules in the model system implies an increase in the computed activation Gibbs energy in all cases. For instance, for  $n = 5$  ten different H–bonded networks were tested. And in all cases the OH–C7 – O1 – OH–C4' network remains in the less energetic structure (**TS2-5w**). We assume that slightly increase in the energy due to the formation of a 3 membered water cycle within the OH–C7 – O1 – OH–C4' network that increases its rigidity, thus affecting the barrier (associated not only

with a O1–C2 bond formation but also with a reduction in the C4a–C4–C3–C2 dihedral angle due to the cyclization process).

Consideration of  $n = 6, 7$  explicit water implies a higher increase in the activation barrier.

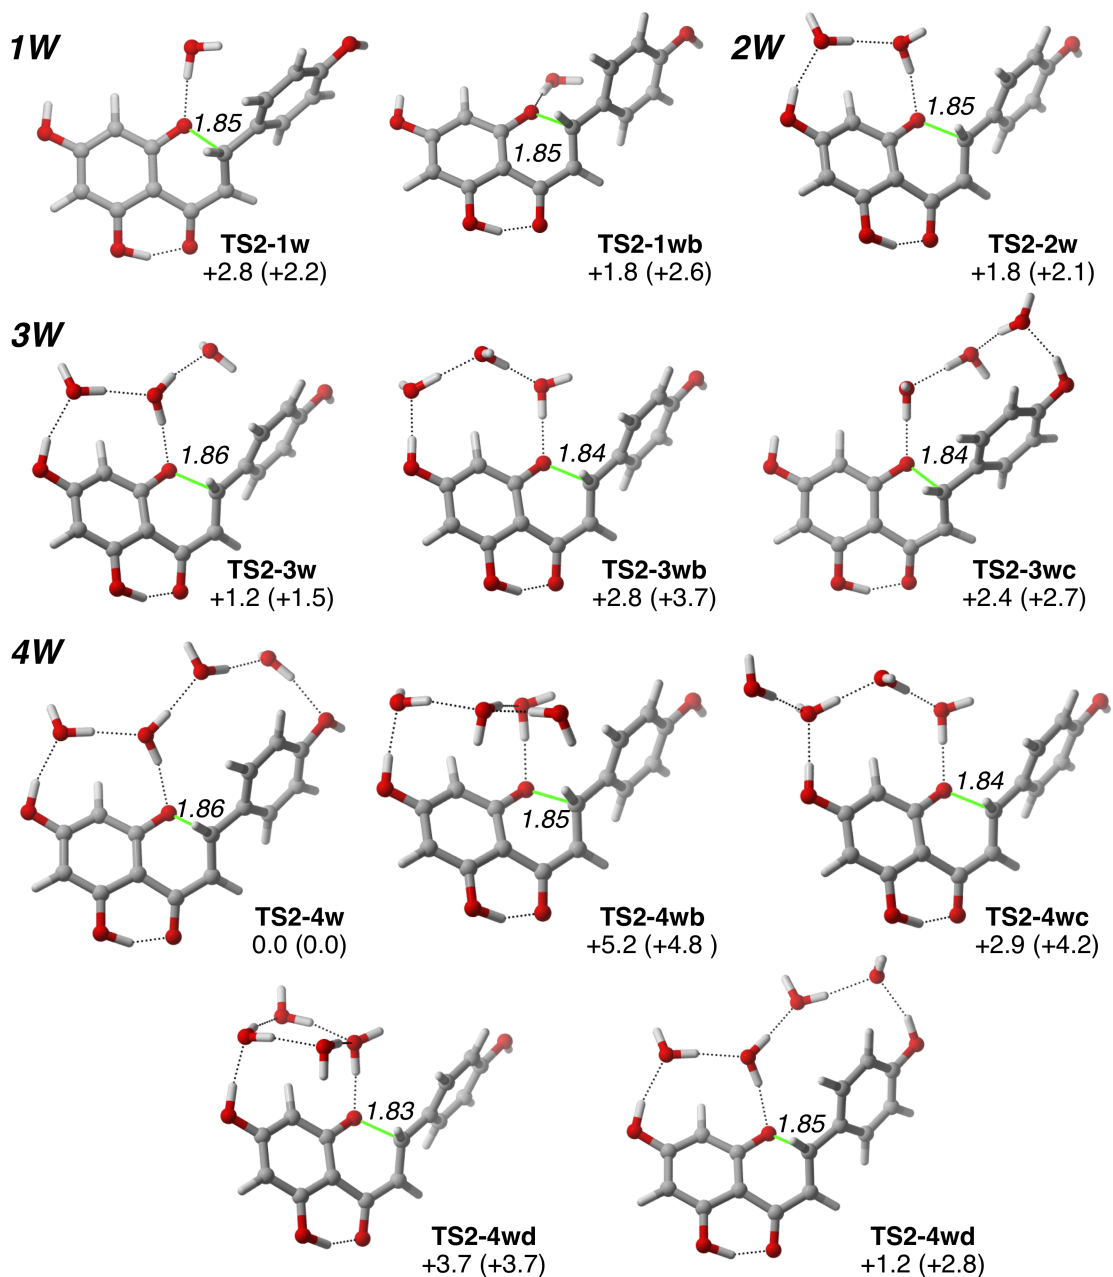

5W

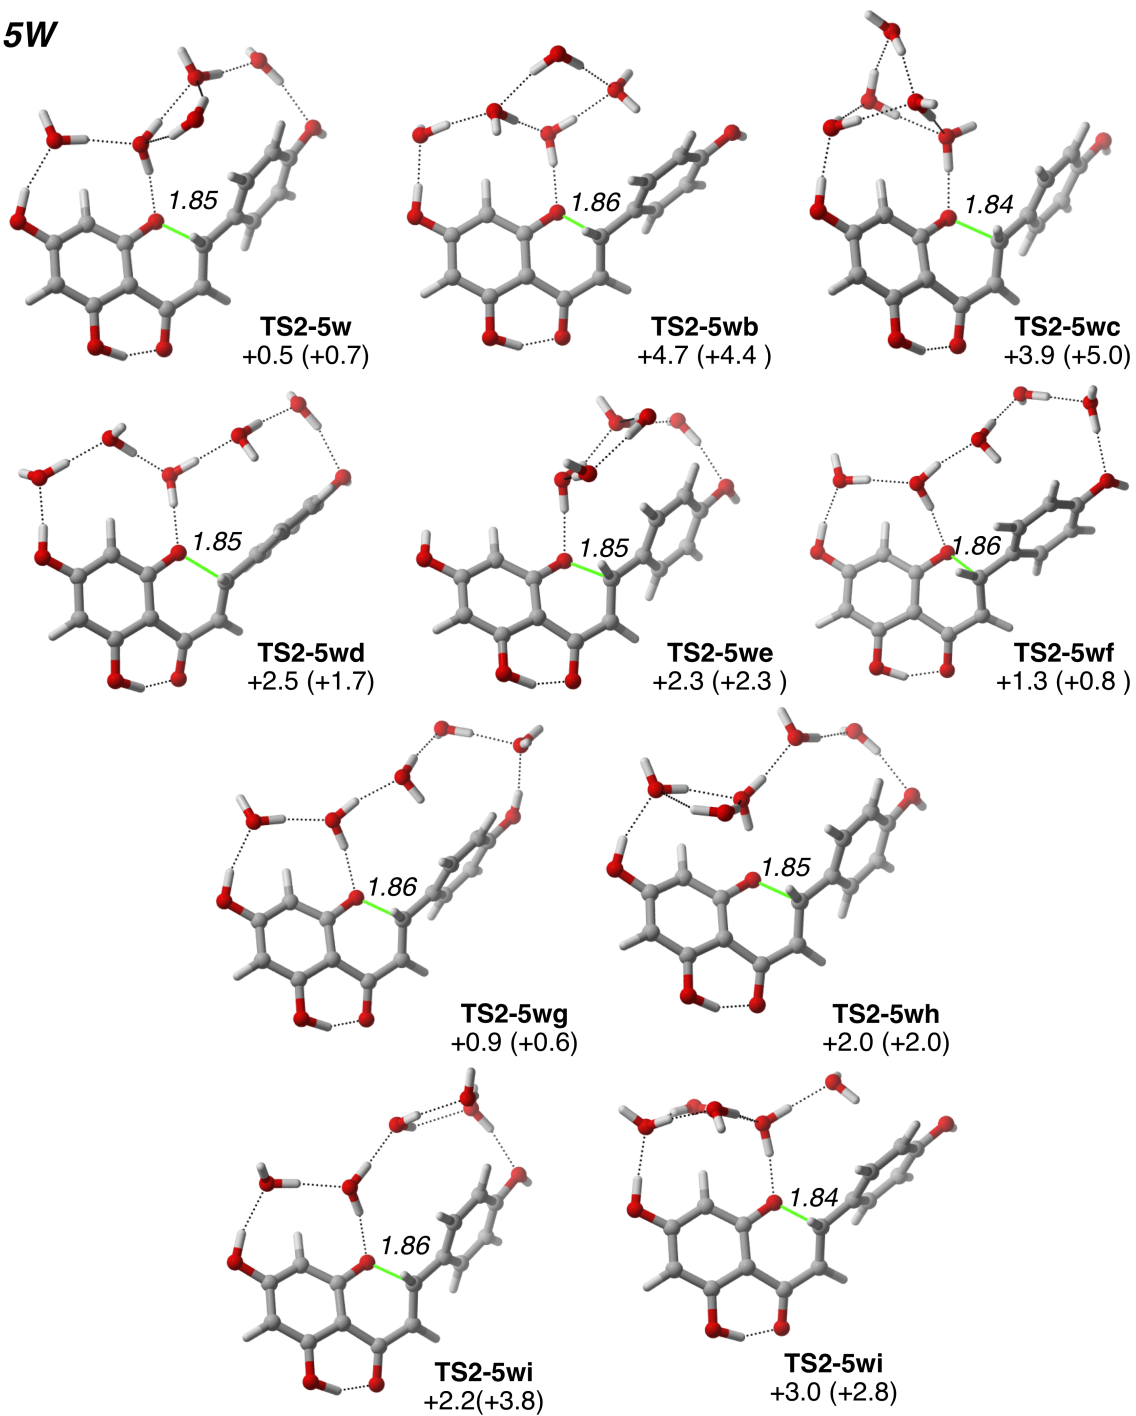

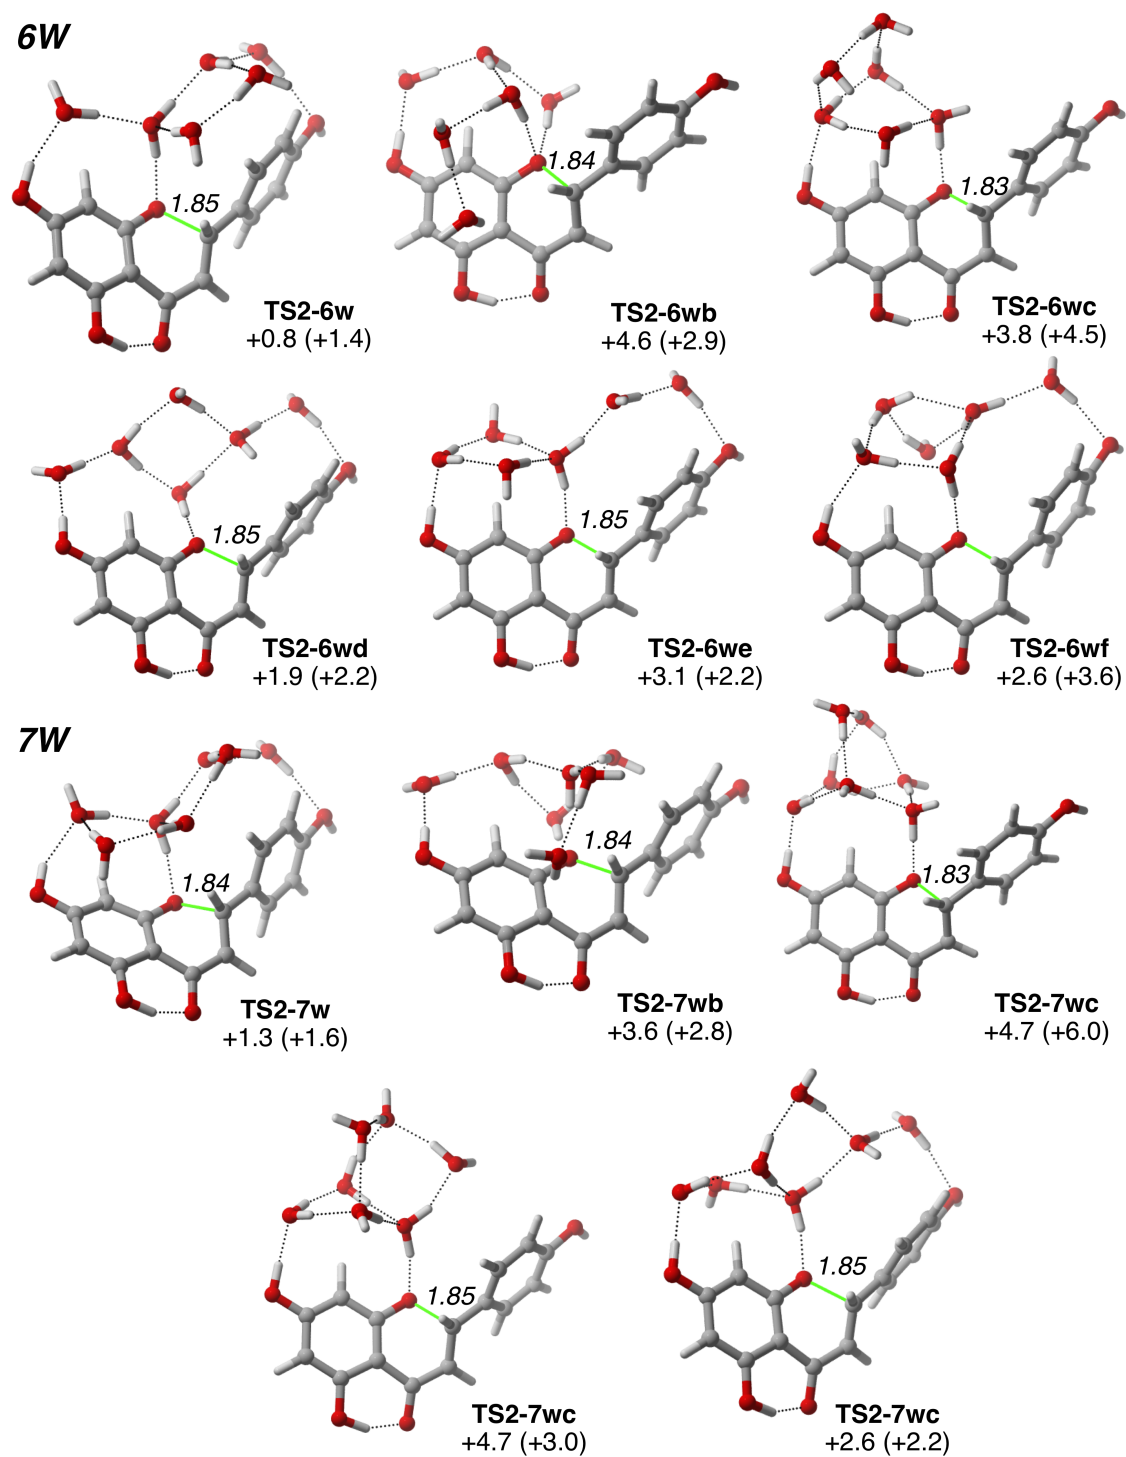

**Figure S5.** Main geometrical features and relative activation (Gibbs) energies of all transition structures associated with the cyclization of INT1 considering  $n=1-7$  explicit water molecules. See Fig. 6 caption for further details.

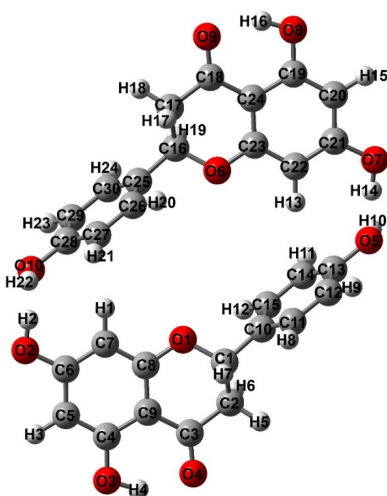

**Figure S6.** Numeration for naringenin dimers included in **Table S3**.

**Table S3.** Comparison between intermolecular interactions computed within different DFT levels of theory and these obtained by X-ray from naringenin cluster (taken from ref.[30] in the main text). Atom numbers are described in Figure S5.

| Dimer   | Interaction  | Interaction length (Å) from XRD data | Interaction length (Å) calculated at M062X/6-31+G(d,p) | Interaction length (Å) calculated at ωb97xd/6-31+G(d,p) | Interaction length (Å) calculated at B3LYP-D3/6-31+G(d,p) |
|---------|--------------|--------------------------------------|--------------------------------------------------------|---------------------------------------------------------|-----------------------------------------------------------|
| (2,2)-a | H22-O10...O2 | 2.805                                | 2.844                                                  | 2.827                                                   | 2.827                                                     |
|         | H22-O10...H2 | 2.041                                | 1.961                                                  | 1.909                                                   | 1.894                                                     |
| (2,2)-b | C16-H19...H1 | 2.316                                | 2.276                                                  | 2.302                                                   | 2.340                                                     |
|         | C16-H19...C7 | 2.786                                | 2.755                                                  | 2.782                                                   | 2.847                                                     |
| (2,2)-e | C30-H24...O2 | 2.595                                | 3.274                                                  | 2.709                                                   | 4.949                                                     |
| (2,2)-f | C15-H11...O9 | 2.712                                | 2.985                                                  | 2.968                                                   | 2.857                                                     |
|         | O5-H10...O9  | 1.950                                | 1.972                                                  | 1.914                                                   | 1.881                                                     |
|         | O5-H10...C18 | 2.848                                | 2.903                                                  | 2.817                                                   | 2.780                                                     |

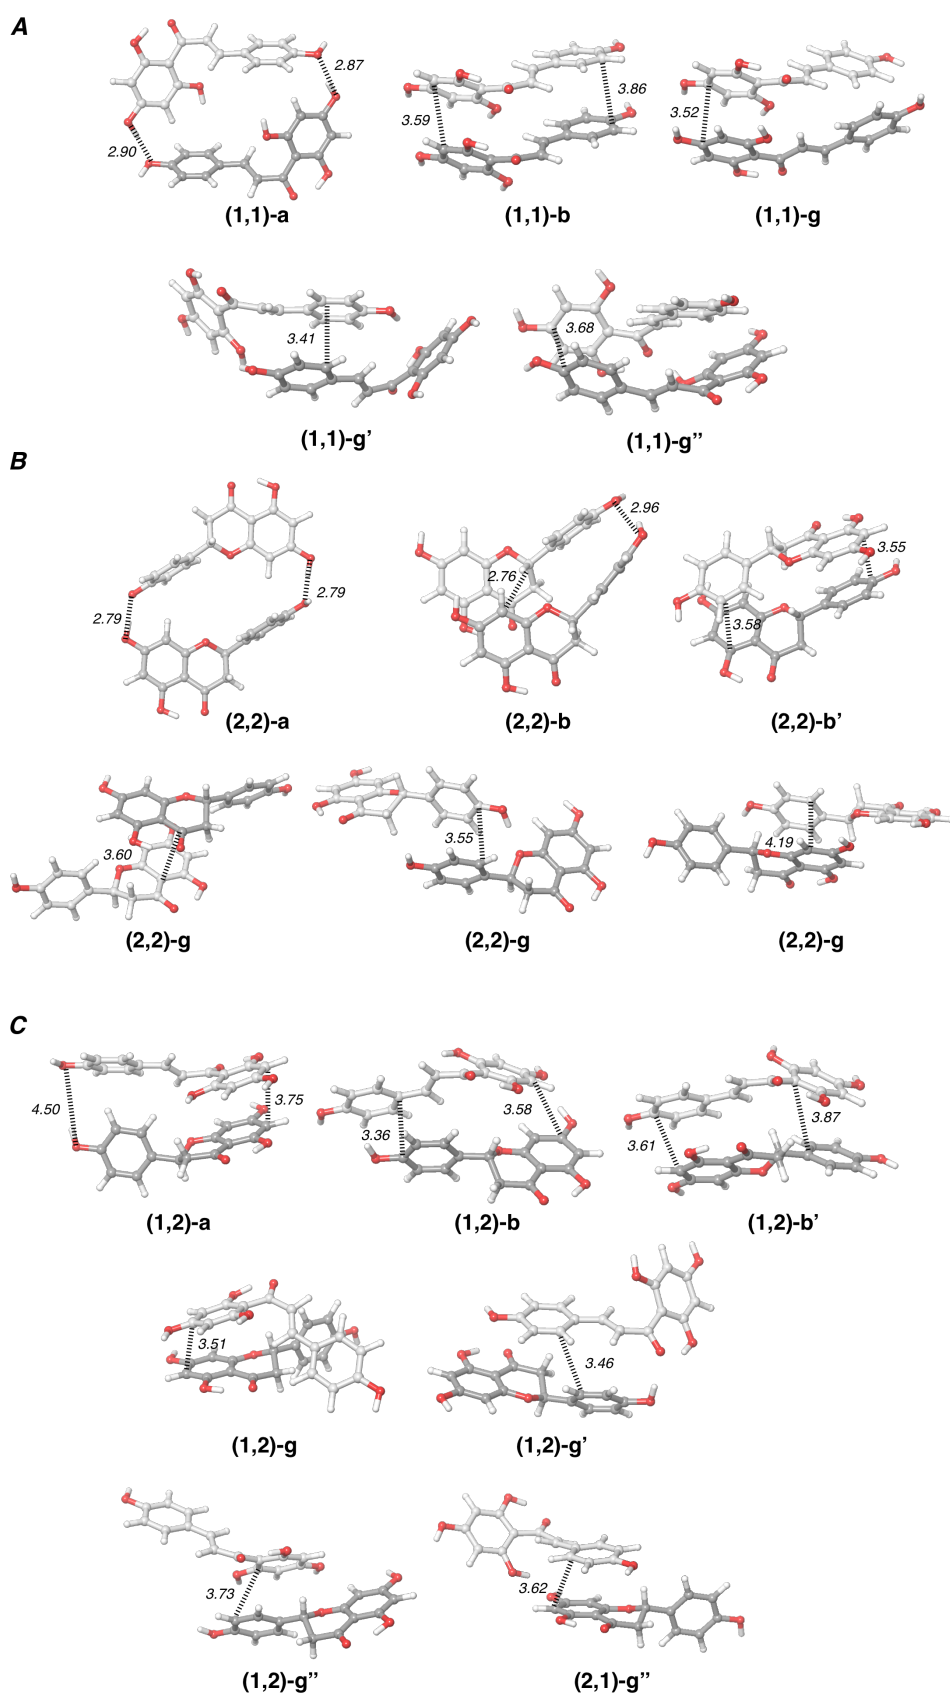

**Figure S7.** Main geometrical features of all (X,Y) dimers computed at  $\omega$ B97XD(PCM, *n*-octanol)/6-31+G(d,p) level.



**Table S4.** Total electronic energies<sup>a</sup> (E, in a.u.), zero point correction of the energy<sup>b</sup> (ZPCE), thermal corrections to Gibbs free energies<sup>b</sup> (TCGFE, in a.u.), and number of imaginary frequencies<sup>c</sup> (NIMAG) of **1** and **2** discussed in the main text.

| Structure | E           | ZPCE     | TCGFE    | NIMAG( $\nu$ ) |
|-----------|-------------|----------|----------|----------------|
| <b>1</b>  | -955.009371 | 0.241495 | 0.195446 | 0              |
| <b>2</b>  | -955.029375 | 0.243867 | 0.199595 | 0              |

<sup>a</sup>Computed at B3LYP(PCM,octanol)/6-31+G\*\* level. <sup>b</sup>Computed at 298.15 K. <sup>c</sup> If NIMAG=1, the imaginary frequency  $\nu$  (in parentheses) is given in  $\text{cm}^{-1}$ .

**Table S5.** Total electronic energies<sup>a</sup> (E, in a.u.), zero point correction of the energy<sup>b</sup> (ZPCE), thermal corrections to Gibbs free energies<sup>b</sup> (TCGFE, in a.u.), and number of imaginary frequencies<sup>c</sup> (NIMAG) of the cyclization reaction of **INT1** in gas phase discussed in the main text.

| Structure      | E            | ZPCE     | TCGFE    | NIMAG( $\nu$ ) |
|----------------|--------------|----------|----------|----------------|
| <b>INT1-gp</b> | -954.4842539 | 0.227381 | 0.179305 | 0              |
| <b>TS2-gp</b>  | -954.4337768 | 0.227079 | 0.182942 | 1 (-373.1110)  |
| <b>INT2-gp</b> | -954.4748578 | 0.227436 | 0.182469 | 0              |

<sup>a</sup>Computed at B3LYP-D3/6-31G+(d,p) level. <sup>b</sup>Computed at 298.15 K. <sup>c</sup> If NIMAG=1 the imaginary frequency  $\nu$  (in parentheses) is given in  $\text{cm}^{-1}$ .

**Table S6.** Total electronic energies<sup>a</sup> (E, in a.u.), zero point correction of the energy<sup>b</sup> (ZPCE), thermal corrections to Gibbs free energies<sup>b</sup> (TCGFE, in a.u.), and number of imaginary frequencies<sup>c</sup> (NIMAG) of the cyclization reaction of **INT1** in octanol.

| Structure     | E            | ZPCE     | TCGFE    | NIMAG( $\nu$ ) |
|---------------|--------------|----------|----------|----------------|
| <b>INT1-o</b> | -954.5622558 | 0.227691 | 0.180839 | 0              |
| <b>TS2-o</b>  | -954.5111232 | 0.227217 | 0.18351  | 1 (-384.5567)  |
| <b>INT2-o</b> | -954.5526025 | 0.228211 | 0.183656 | 0              |

<sup>a</sup>Computed at B3LYP-D3(PCM,octanol)/6-31G+(d,p) level. <sup>b</sup>Computed at 298.15 K. <sup>c</sup> If NIMAG=1 the imaginary frequency  $\nu$  (in parentheses) is given in  $\text{cm}^{-1}$ .

**Table S7.** Total electronic energies<sup>a</sup> (E, in a.u.), zero point correction of the energies<sup>b</sup> (ZPCE), thermal corrections to Gibbs free energies<sup>b</sup> (TCGFE, in a.u.), and number of imaginary frequencies<sup>c</sup> (NIMAG) of the cyclization reaction of INT1 in water discussed in the main text.

| Structure | E            | ZPCE     | TCGFE    | NIMAG(v)      |
|-----------|--------------|----------|----------|---------------|
| INT1-w    | -954.572209  | 0.227683 | 0.181098 | 0             |
| TS2-w     | -954.520987  | 0.227225 | 0.18351  | 1 (-384.0088) |
| INT2-w    | -954.562403  | 0.228325 | 0.183943 | 0             |
| INT1-1w   | -1031.031639 | 0.252326 | 0.202229 | 0             |
| TS2-1w    | -1031.006529 | 0.251808 | 0.203603 | 1 (-420.1960) |
| INT2-1w   | -1031.016365 | 0.252677 | 0.203951 | 0             |
| INT1-1wb  | -1031.030242 | 0.251923 | 0.200025 | 0             |
| TS2-1wb   | -1031.006025 | 0.251473 | 0.202896 | 1 (-413.1906) |
| INT2-1wb  | -1031.016292 | 0.252503 | 0.203432 | 0             |
| INT1-2wb  | -1183.938511 | 0.302234 | 0.244474 | 0             |
| TS2-2w    | -1183.915522 | 0.302009 | 0.246752 | 1 (-406.4194) |
| INT2-2w   | -1183.925831 | 0.302937 | 0.246732 | 0             |
| INT1-2w   | -1107.486131 | 0.277640 | 0.224238 | 0             |
| TS2-2wb   | -1107.462000 | 0.277302 | 0.226342 | 1 (-412.0947) |
| INT2-2wb  | -1107.471538 | 0.278230 | 0.226579 | 0             |
| INT1-2wc  | -1183.946007 | 0.302613 | 0.246735 | 0             |
| TS2-2wc   | -1183.921277 | 0.302568 | 0.249265 | 1 (-428.8266) |
| INT2-2wc  | -1183.929911 | 0.303598 | 0.249437 | 0             |
| INT1-3w   | -1183.949657 | 0.302241 | 0.244052 | 0             |
| TS2-3w    | -1183.924540 | 0.302491 | 0.247737 | 1 (-428.8866) |
| INT2-3w   | -1183.933732 | 0.303457 | 0.247722 | 0             |
| INT1-4w   | -1260.391466 | 0.32713  | 0.265782 | 0             |
| TS2-4w    | -1260.370626 | 0.327229 | 0.267921 | 1 (-409.953)  |
| INT2-4w   | -1260.380926 | 0.328294 | 0.268686 | 0             |
| INT1-4wb  | -1260.432322 | 0.327362 | 0.268405 | 0             |
| TS2-4wb   | -1260.403093 | 0.327118 | 0.269867 | 1 (-436.1513) |
| INT2-4wb  | -1260.412494 | 0.328232 | 0.27013  | 0             |
| INT1-4wc  | -1260.400862 | 0.32634  | 0.260873 | 0             |
| TS2-4wc   | -1260.375523 | 0.326577 | 0.265248 | 1 (-430.5348) |
| INT2-4wc  | -1260.38469  | 0.327684 | 0.265179 | 0             |
| INT1-4wd  | -1260.409077 | 0.328633 | 0.269139 | 0             |
| TS2-4wd   | -1260.382548 | 0.328924 | 0.272599 | 1 (-432.4934) |
| INT2-4wd  | -1260.390806 | 0.329657 | 0.271024 | 0             |
| INT1-4we  | -1260.392858 | 0.326334 | 0.263073 | 0             |
| TS2-4we   | -1260.37078  | 0.327108 | 0.268414 | 1 (-411.8318) |
| INT2-4we  | -1260.380166 | 0.328033 | 0.268593 | 0             |
| INT1-5w   | -1336.847011 | 0.352579 | 0.288832 | 0             |
| TS2-5w    | -1336.825562 | 0.352835 | 0.291408 | 1 (-415.7500) |
| INT2-5w   | -1336.834916 | 0.353731 | 0.291316 | 0             |
| INT1-5wb  | -1336.891280 | 0.351850 | 0.289071 | 0             |
| TS2-5wb   | -1336.862574 | 0.351518 | 0.290298 | 1 (-430.3716) |
| INT2-5wb  | -1336.873648 | 0.353480 | 0.291655 | 0             |

|          |              |          |          |               |
|----------|--------------|----------|----------|---------------|
| INT1-5wc | -1336.86423  | 0.353844 | 0.2903   | 0             |
| TS2-5wc  | -1336.837542 | 0.354284 | 0.294473 | 1 (-433.0527) |
| INT2-5wc | -1336.846261 | 0.355639 | 0.29505  | 0             |
| INT1-5wd | -1336.858688 | 0.352757 | 0.289608 | 0             |
| TS2-5wd  | -1336.833645 | 0.352655 | 0.290223 | 1 (-423.4180) |
| INT2-5wd | -1336.844696 | 0.353798 | 0.290877 | 0             |
| INT1-5we | -1336.852958 | 0.353075 | 0.289402 | 0             |
| TS2-5we  | -1336.828472 | 0.353072 | 0.291483 | 1 (-419.3362) |
| INT2-5we | -1336.838012 | 0.354147 | 0.291887 | 0             |
| INT1-5wf | -1336.849433 | 0.352976 | 0.288418 | 0             |
| TS2-5wf  | -1336.825915 | 0.352392 | 0.289103 | 1 (-406.6509) |
| INT2-5wf | -1336.836846 | 0.353359 | 0.288968 | 0             |
| INT1-5wg | -1336.848237 | 0.352024 | 0.287521 | 0             |
| TS2-5wg  | -1336.826337 | 0.352507 | 0.289473 | 1 (-410.3543) |
| INT2-5wg | -1336.836674 | 0.353284 | 0.288869 | 0             |
| INT1-5wh | -1336.849753 | 0.352428 | 0.288261 | 0             |
| TS2-5wh  | -1336.825662 | 0.352368 | 0.290298 | 1 (-417.3751) |
| INT2-5wh | -1336.83489  | 0.353277 | 0.289752 | 0             |
| INT1-5wi | -1336.849159 | 0.352557 | 0.286757 | 0             |
| TS2-5wi  | -1336.825038 | 0.352825 | 0.291579 | 1 (-406.2921) |
| INT2-5wi | -1336.835142 | 0.353638 | 0.291382 | 0             |
| INT1-5wj | -1336.861731 | 0.353721 | 0.291407 | 0             |
| TS2-5wj  | -1336.835663 | 0.353319 | 0.292467 | 1 (-428.6549) |
| INT2-5wj | -1336.845671 | 0.354359 | 0.292447 | 0             |
| INT1-6w  | -1413.307668 | 0.377968 | 0.311222 | 0             |
| TS2-6w   | -1413.2863   | 0.378759 | 0.314975 | 1 (-419.9690) |
| INT2-6w  | -1413.295467 | 0.379919 | 0.315942 | 0             |
| INT1-6wb | -1413.355155 | 0.377730 | 0.313327 | 0             |
| TS2-6wb  | -1413.32565  | 0.376460 | 0.311451 | 1 (-427.8643) |
| INT2-6wb | -1413.334801 | 0.376868 | 0.311452 | 0             |
| INT1-6wc | -1413.321199 | 0.37879  | 0.311135 | 0             |
| TS2-6wc  | -1413.294508 | 0.379083 | 0.314679 | 1 (-433.3977) |
| INT2-6wc | -1413.303103 | 0.380479 | 0.315404 | 0             |
| INT1-6wd | -1413.316703 | 0.378669 | 0.312343 | 0             |
| TS2-6wd  | -1413.292778 | 0.378658 | 0.314292 | 1 (-420.1094) |
| INT2-6wd | -1413.303591 | 0.379984 | 0.315387 | 0             |
| INT1-6we | -1413.318892 | 0.379303 | 0.314918 | 0             |
| TS2-6we  | -1413.292759 | 0.379027 | 0.315272 | 1 (-423.4868) |
| INT2-6we | -1413.302727 | 0.379927 | 0.313745 | 0             |
| INT1-6wf | -1413.318892 | 0.379303 | 0.314918 | 0             |
| TS2-6wf  | -1413.292759 | 0.379027 | 0.315272 | 1 (-405.5166) |
| INT2-6wf | -1413.302727 | 0.379927 | 0.313745 | 0             |
| INT1-7w  | -1489.770012 | 0.404903 | 0.337823 | 0             |
| TS2-7w   | -1489.747169 | 0.405052 | 0.340476 | 1 (-422.5613) |
| INT2-7w  | -1489.754988 | 0.405962 | 0.340519 | 0             |
| INT1-7wb | -1489.813758 | 0.403093 | 0.335076 | 0             |
| TS2-7wb  | -1489.787939 | 0.402225 | 0.336728 | 1 (-434.2627) |
| INT2-7wb | -1489.796569 | 0.403346 | 0.336720 | 0             |
| INT1-7wc | -1489.778515 | 0.403371 | 0.332287 | 0             |

|                                          |              |          |          |                |
|------------------------------------------|--------------|----------|----------|----------------|
| <b>TS2-7wc</b>                           | -1489.751463 | 0.404665 | 0.337803 | 1 (-437.2486)  |
| <b>INT2-7wc</b>                          | -1489.759592 | 0.405772 | 0.337048 | 0              |
| <b>INT1-7wd</b>                          | -1489.777881 | 0.404802 | 0.335268 | 0              |
| <b>TS2-7wd</b>                           | -1489.752778 | 0.404846 | 0.337887 | 1 (-424.2405)  |
| <b>INT2-7wd</b>                          | -1489.762392 | 0.406211 | 0.338402 | 0              |
| <b>INT1-7we</b>                          | -1489.774249 | 0.404661 | 0.336604 | 0              |
| <b>TS2-7we</b>                           | -1489.749372 | 0.404874 | 0.338123 | 1 (-429.3527)  |
| <b>INT2-7we</b>                          | -1489.759598 | 0.405948 | 0.338273 | 0              |
| <b>1·4H<sub>2</sub>O<sup>d</sup></b>     | -1260.422650 | 0.323595 | 0.263562 | 0              |
| <b>TS1·4H<sub>2</sub>O<sup>d</sup></b>   | -1260.419001 | 0.321399 | 0.260924 | 1 (-717.2124)  |
| <b>INT1'·4H<sub>2</sub>O<sup>d</sup></b> | -1260.437207 | 0.327649 | 0.269318 | 0              |
| <b>INT1·4H<sub>2</sub>O<sup>d</sup></b>  | -1260.429428 | 0.326518 | 0.265436 | 0              |
| <b>INT2·4H<sub>2</sub>O<sup>d</sup></b>  | -1260.414194 | 0.327160 | 0.267345 | 0              |
| <b>TS3·4H<sub>2</sub>O<sup>d</sup></b>   | -1260.403014 | 0.322723 | 0.264942 | 1 (-1492.8676) |
| <b>2·4H<sub>2</sub>O<sup>d</sup></b>     | -1260.431800 | 0.326691 | 0.267797 | 0              |

<sup>a</sup>Computed at B3LYP-D3(PCM, water)/6-31G+(d,p) level. <sup>b</sup>Computed at 298.15 K <sup>c</sup> If NIMAG=1 the imaginary frequency  $\nu$  (in parentheses) is given in  $\text{cm}^{-1}$ . <sup>d</sup> Computed with the radii=Pauling option for the generation of the cavity.

**Table S8.** Total electronic energies<sup>a</sup> (E, in a.u.), zero point correction of the energy<sup>b</sup> (ZPCE), thermal corrections to Gibbs free energies<sup>b</sup> (TCGFE, in a.u.), and number of imaginary frequencies<sup>c</sup> (NIMAG) of **1** and **2** the aggregation analysis discussed in the main text.

| Structure | E            | ZPCE     | TCGFE    | NIMAG( $\nu$ ) |
|-----------|--------------|----------|----------|----------------|
| <b>1</b>  | -954.691516  | 0.245099 | 0.198595 | 0              |
| <b>2</b>  | -954.719940  | 0.247551 | 0.203310 | 0              |
| (1,1)-a   | -1909.400840 | 0.492761 | 0.423244 | 0              |
| (1,1)-b   | -1909.407960 | 0.491782 | 0.423406 | 0              |
| (1,1)-g   | -1909.413640 | 0.491992 | 0.422055 | 0              |
| (1,1)-g'  | -1909.401252 | 0.492333 | 0.423151 | 0              |
| (1,1)-g'' | -1909.408266 | 0.493014 | 0.424681 | 0              |
| (2,2)-a   | -1909.461817 | 0.497515 | 0.430233 | 0              |
| (2,2)-b   | -1909.461030 | 0.496711 | 0.430612 | 0              |
| (2,2)-b'  | -1909.466295 | 0.496812 | 0.431356 | 0              |
| (2,2)-g   | -1909.460870 | 0.496532 | 0.427799 | 0              |
| (2,2)-g'  | -1909.456948 | 0.496865 | 0.427694 | 0              |
| (2,2)-g'' | -1909.458716 | 0.496562 | 0.428168 | 0              |
| (1,2)-a   | -1909.432842 | 0.495203 | 0.426761 | 0              |
| (1,2)-b   | -1909.435768 | 0.494169 | 0.424899 | 0              |
| (1,2)-b'  | -1909.434954 | 0.494483 | 0.42758  | 0              |
| (1,2)-g   | -1909.434136 | 0.494441 | 0.424836 | 0              |
| (1,2)-g'  | -1909.432251 | 0.494826 | 0.426807 | 0              |
| (1,2)-g'' | -1909.427663 | 0.493702 | 0.422575 | 0              |
| (2,1)-g'' | -1909.434691 | 0.495400 | 0.427694 | 0              |

<sup>a</sup>Computed at wB97XD(PCM,octanol)/6-31G+(d,p) level. <sup>b</sup>Computed at 298.15 K. <sup>c</sup> If NIMAG=1 the imaginary frequency  $\nu$  (in parentheses) is given in  $\text{cm}^{-1}$ .

## Cartesian coordinates of all the stationary points collected in the main text

### 1

| Center Number | Atomic Number | Atomic Type | Coordinates (Angstroms) |           |           |
|---------------|---------------|-------------|-------------------------|-----------|-----------|
|               |               |             | X                       | Y         | Z         |
| 1             | 6             | 0           | -4.094761               | -1.388026 | -0.194664 |
| 2             | 6             | 0           | -4.262238               | -0.118670 | -0.742959 |
| 3             | 6             | 0           | -3.292796               | 0.855869  | -0.505982 |
| 4             | 6             | 0           | -2.087432               | 0.566102  | 0.214483  |
| 5             | 6             | 0           | -2.002106               | -0.722311 | 0.808897  |
| 6             | 6             | 0           | -2.981496               | -1.691956 | 0.601260  |
| 7             | 8             | 0           | -5.072131               | -2.303594 | -0.439009 |
| 8             | 8             | 0           | -3.524775               | 2.087419  | -1.002134 |
| 9             | 8             | 0           | -0.954105               | -0.983125 | 1.640192  |
| 10            | 6             | 0           | -1.065432               | 1.627308  | 0.314057  |
| 11            | 6             | 0           | 0.376311                | 1.387889  | 0.430002  |
| 12            | 6             | 0           | 1.021118                | 0.299792  | -0.049985 |
| 13            | 6             | 0           | 2.943007                | -1.107411 | -0.695099 |
| 14            | 6             | 0           | 2.461736                | 0.076180  | -0.100700 |
| 15            | 6             | 0           | 3.413161                | 0.981549  | 0.420708  |
| 16            | 6             | 0           | 4.773407                | 0.717162  | 0.350668  |
| 17            | 6             | 0           | 5.225960                | -0.469538 | -0.248611 |
| 18            | 6             | 0           | 4.305534                | -1.385232 | -0.772458 |
| 19            | 8             | 0           | 6.574710                | -0.672780 | -0.288644 |
| 20            | 8             | 0           | -1.427346               | 2.831763  | 0.210635  |
| 21            | 1             | 0           | -5.148447               | 0.126428  | -1.316065 |
| 22            | 1             | 0           | -2.891899               | -2.666306 | 1.074583  |
| 23            | 1             | 0           | -4.869521               | -3.144565 | -0.004467 |
| 24            | 1             | 0           | -2.821210               | 2.678330  | -0.614869 |
| 25            | 1             | 0           | -1.043176               | -1.871706 | 2.013534  |
| 26            | 1             | 0           | 0.923484                | 2.253442  | 0.793706  |
| 27            | 1             | 0           | 0.423504                | -0.505929 | -0.468669 |
| 28            | 1             | 0           | 2.234983                | -1.822675 | -1.104668 |
| 29            | 1             | 0           | 3.087312                | 1.904606  | 0.888763  |
| 30            | 1             | 0           | 5.499156                | 1.416231  | 0.753314  |
| 31            | 1             | 0           | 4.651810                | -2.304994 | -1.236045 |
| 32            | 1             | 0           | 6.779336                | -1.512556 | -0.725118 |

### 2

| Center Number | Atomic Number | Atomic Type | Coordinates (Angstroms) |           |           |
|---------------|---------------|-------------|-------------------------|-----------|-----------|
|               |               |             | X                       | Y         | Z         |
| 1             | 8             | 0           | 0.050053                | -0.749054 | -0.026255 |
| 2             | 6             | 0           | -0.698845               | 0.412793  | 0.446249  |
| 3             | 6             | 0           | -0.203345               | 1.674848  | -0.264345 |
| 4             | 6             | 0           | 1.295862                | 1.828571  | -0.131498 |
| 5             | 6             | 0           | 3.487793                | 0.627396  | 0.009364  |
| 6             | 6             | 0           | 4.218237                | -0.556097 | 0.024642  |
| 7             | 6             | 0           | 3.529155                | -1.774893 | 0.014930  |
| 8             | 6             | 0           | 2.126838                | -1.839263 | 0.004782  |
| 9             | 6             | 0           | 1.404844                | -0.651580 | -0.003889 |
| 10            | 6             | 0           | 2.059133                | 0.609320  | -0.010587 |
| 11            | 8             | 0           | 1.830988                | 2.958253  | -0.165983 |
| 12            | 8             | 0           | 4.145884                | 1.801892  | -0.002455 |
| 13            | 8             | 0           | 4.289446                | -2.900995 | 0.029394  |
| 14            | 6             | 0           | -2.165732               | 0.124038  | 0.249833  |
| 15            | 6             | 0           | -3.041261               | 0.143753  | 1.343835  |
| 16            | 6             | 0           | -4.405339               | -0.100299 | 1.183383  |
| 17            | 6             | 0           | -4.910393               | -0.382112 | -0.089875 |
| 18            | 6             | 0           | -4.049567               | -0.412872 | -1.195101 |
| 19            | 6             | 0           | -2.690104               | -0.156937 | -1.020158 |
| 20            | 8             | 0           | -6.254213               | -0.623223 | -0.197358 |

|    |   |   |           |           |           |
|----|---|---|-----------|-----------|-----------|
| 21 | 1 | 0 | -0.490810 | 0.504768  | 1.520036  |
| 22 | 1 | 0 | -0.444558 | 1.630981  | -1.335027 |
| 23 | 1 | 0 | -0.696239 | 2.559943  | 0.146609  |
| 24 | 1 | 0 | 5.301512  | -0.535635 | 0.035782  |
| 25 | 1 | 0 | 1.602482  | -2.788804 | 0.019350  |
| 26 | 1 | 0 | 3.456009  | 2.517537  | -0.053504 |
| 27 | 1 | 0 | 3.730375  | -3.691783 | 0.013360  |
| 28 | 1 | 0 | -2.655595 | 0.352334  | 2.338218  |
| 29 | 1 | 0 | -5.079831 | -0.082817 | 2.033305  |
| 30 | 1 | 0 | -4.440913 | -0.634789 | -2.184622 |
| 31 | 1 | 0 | -2.034577 | -0.190508 | -1.885404 |
| 32 | 1 | 0 | -6.488778 | -0.816196 | -1.116226 |

### INT1-gp

| Center Number | Atomic Number | Atomic Type | Coordinates (Angstroms) |           |           |
|---------------|---------------|-------------|-------------------------|-----------|-----------|
|               |               |             | X                       | Y         | Z         |
| 1             | 6             | 0           | 4.523013                | -1.140929 | -0.109808 |
| 2             | 6             | 0           | 4.636577                | 0.257147  | -0.083695 |
| 3             | 6             | 0           | 3.479721                | 1.021899  | 0.005399  |
| 4             | 6             | 0           | 2.146603                | 0.432042  | 0.062682  |
| 5             | 6             | 0           | 2.065969                | -1.046622 | 0.090004  |
| 6             | 6             | 0           | 3.303080                | -1.775521 | -0.036478 |
| 7             | 8             | 0           | 5.707273                | -1.851300 | -0.205301 |
| 8             | 8             | 0           | 3.648898                | 2.358643  | 0.022523  |
| 9             | 8             | 0           | 0.992368                | -1.703875 | 0.229450  |
| 10            | 6             | 0           | 1.024369                | 1.349746  | 0.055011  |
| 11            | 6             | 0           | -0.438860               | 1.082969  | -0.046507 |
| 12            | 6             | 0           | -1.194869               | -0.013839 | 0.161261  |
| 13            | 6             | 0           | -2.661752               | -0.057366 | 0.076939  |
| 14            | 6             | 0           | -3.494659               | 1.076225  | -0.040689 |
| 15            | 6             | 0           | -4.879577               | 0.963603  | -0.121415 |
| 16            | 6             | 0           | -5.479170               | -0.299756 | -0.082756 |
| 17            | 6             | 0           | -4.684063               | -1.441423 | 0.041999  |
| 18            | 6             | 0           | -3.296192               | -1.313328 | 0.123400  |
| 19            | 8             | 0           | -6.856384               | -0.356540 | -0.164801 |
| 20            | 8             | 0           | 1.234754                | 2.618344  | 0.084699  |
| 21            | 1             | 0           | 5.602433                | 0.744473  | -0.133993 |
| 22            | 1             | 0           | 3.223260                | -2.860495 | -0.030279 |
| 23            | 1             | 0           | 5.487522                | -2.791983 | -0.211270 |
| 24            | 1             | 0           | 2.700206                | 2.732704  | 0.069929  |
| 25            | 1             | 0           | -0.928674               | 2.027215  | -0.281739 |
| 26            | 1             | 0           | -0.674308               | -0.941718 | 0.380385  |
| 27            | 1             | 0           | -3.050983               | 2.066562  | -0.059486 |
| 28            | 1             | 0           | -5.510593               | 1.842926  | -0.208075 |
| 29            | 1             | 0           | -5.144977               | -2.427526 | 0.076368  |
| 30            | 1             | 0           | -2.681637               | -2.204270 | 0.219137  |
| 31            | 1             | 0           | -7.138652               | -1.279142 | -0.125619 |

### TS2-gp

| Center Number | Atomic Number | Atomic Type | Coordinates (Angstroms) |           |           |
|---------------|---------------|-------------|-------------------------|-----------|-----------|
|               |               |             | X                       | Y         | Z         |
| 1             | 6             | 0           | 3.286422                | -1.866740 | 1.456544  |
| 2             | 6             | 0           | 3.182709                | -3.070106 | 2.152044  |
| 3             | 6             | 0           | 3.985778                | -4.140646 | 1.739112  |
| 4             | 6             | 0           | 4.952546                | -4.010063 | 0.697905  |
| 5             | 6             | 0           | 5.038928                | -2.746677 | -0.000609 |
| 6             | 6             | 0           | 4.166524                | -1.699341 | 0.390739  |
| 7             | 8             | 0           | 2.472152                | -0.824840 | 1.871296  |
| 8             | 8             | 0           | 3.808868                | -5.335649 | 2.340145  |
| 9             | 8             | 0           | 5.877133                | -2.504503 | -0.987721 |
| 10            | 6             | 0           | 5.613852                | -5.234749 | 0.184305  |
| 11            | 6             | 0           | 6.624622                | -5.063319 | -0.794083 |
| 12            | 6             | 0           | 7.238514                | -3.803157 | -0.905507 |
| 13            | 6             | 0           | 8.130991                | -3.478105 | -2.042542 |
| 14            | 6             | 0           | 7.915422                | -3.997497 | -3.331452 |

|    |   |   |           |           |           |
|----|---|---|-----------|-----------|-----------|
| 15 | 6 | 0 | 8.758640  | -3.683612 | -4.394607 |
| 16 | 6 | 0 | 9.841562  | -2.823556 | -4.187667 |
| 17 | 6 | 0 | 10.068337 | -2.278441 | -2.921793 |
| 18 | 6 | 0 | 9.211684  | -2.602557 | -1.866938 |
| 19 | 8 | 0 | 10.650578 | -2.537655 | -5.270256 |
| 20 | 8 | 0 | 5.181792  | -6.386217 | 0.550297  |
| 21 | 1 | 0 | 2.462505  | -3.201394 | 2.950988  |
| 22 | 1 | 0 | 4.243949  | -0.748860 | -0.132644 |
| 23 | 1 | 0 | 2.621436  | -0.078035 | 1.277293  |
| 24 | 1 | 0 | 4.311103  | -5.992535 | 1.735849  |
| 25 | 1 | 0 | 6.818257  | -5.865910 | -1.498039 |
| 26 | 1 | 0 | 7.542398  | -3.310526 | 0.018439  |
| 27 | 1 | 0 | 7.062039  | -4.647193 | -3.497184 |
| 28 | 1 | 0 | 8.585509  | -4.086046 | -5.388102 |
| 29 | 1 | 0 | 10.905256 | -1.600189 | -2.760468 |
| 30 | 1 | 0 | 9.383657  | -2.166490 | -0.886434 |
| 31 | 1 | 0 | 11.343027 | -1.925074 | -4.991332 |

### INT2-gp

| Center<br>Number | Atomic<br>Number | Atomic<br>Type | Coordinates (Angstroms) |           |           |
|------------------|------------------|----------------|-------------------------|-----------|-----------|
|                  |                  |                | X                       | Y         | Z         |
| 1                | 6                | 0              | -3.086365               | 1.426082  | 2.016765  |
| 2                | 6                | 0              | -3.277431               | 0.194738  | 2.637301  |
| 3                | 6                | 0              | -2.394037               | -0.860679 | 2.343016  |
| 4                | 6                | 0              | -1.299876               | -0.658892 | 1.461673  |
| 5                | 6                | 0              | -1.153925               | 0.594267  | 0.852533  |
| 6                | 6                | 0              | -2.036668               | 1.648971  | 1.117124  |
| 7                | 8                | 0              | -3.979702               | 2.440485  | 2.329862  |
| 8                | 8                | 0              | -2.590931               | -2.076759 | 2.867936  |
| 9                | 8                | 0              | -0.169270               | 0.819208  | -0.070853 |
| 10               | 6                | 0              | -0.424754               | -1.797801 | 1.068938  |
| 11               | 6                | 0              | 0.649449                | -1.484418 | 0.268117  |
| 12               | 6                | 0              | 1.012101                | -0.042645 | 0.063057  |
| 13               | 6                | 0              | 1.848408                | 0.183087  | -1.177457 |
| 14               | 6                | 0              | 1.298054                | -0.027091 | -2.450654 |
| 15               | 6                | 0              | 2.058630                | 0.147554  | -3.604904 |
| 16               | 6                | 0              | 3.402091                | 0.522858  | -3.496653 |
| 17               | 6                | 0              | 3.971774                | 0.730286  | -2.239614 |
| 18               | 6                | 0              | 3.187049                | 0.566513  | -1.090370 |
| 19               | 8                | 0              | 4.118451                | 0.676608  | -4.669955 |
| 20               | 8                | 0              | -0.776298               | -2.984468 | 1.486234  |
| 21               | 1                | 0              | -4.109592               | 0.036516  | 3.313678  |
| 22               | 1                | 0              | -1.884362               | 2.611041  | 0.635084  |
| 23               | 1                | 0              | -3.749551               | 3.218558  | 1.806933  |
| 24               | 1                | 0              | -1.857848               | -2.671414 | 2.365688  |
| 25               | 1                | 0              | 1.326519                | -2.251607 | -0.092038 |
| 26               | 1                | 0              | 1.563710                | 0.384997  | 0.926642  |
| 27               | 1                | 0              | 0.258397                | -0.330888 | -2.518196 |
| 28               | 1                | 0              | 1.633077                | -0.007956 | -4.591616 |
| 29               | 1                | 0              | 5.017539                | 1.022355  | -2.153918 |
| 30               | 1                | 0              | 3.630223                | 0.737980  | -0.112287 |
| 31               | 1                | 0              | 5.026076                | 0.925596  | -4.454714 |

### INT1-o

| Center<br>Number | Atomic<br>Number | Atomic<br>Type | Coordinates (Angstroms) |           |           |
|------------------|------------------|----------------|-------------------------|-----------|-----------|
|                  |                  |                | X                       | Y         | Z         |
| 1                | 6                | 0              | 4.152155                | -1.374325 | 0.151715  |
| 2                | 6                | 0              | 4.363112                | -0.058914 | 0.607062  |
| 3                | 6                | 0              | 3.362904                | 0.879343  | 0.395781  |
| 4                | 6                | 0              | 2.100931                | 0.541753  | -0.219198 |
| 5                | 6                | 0              | 1.944361                | -0.810714 | -0.791114 |
| 6                | 6                | 0              | 3.003067                | -1.747881 | -0.519881 |
| 7                | 8                | 0              | 5.175394                | -2.261429 | 0.394390  |
| 8                | 8                | 0              | 3.601678                | 2.144567  | 0.823913  |
| 9                | 8                | 0              | 0.957684                | -1.153823 | -1.514193 |
| 10               | 6                | 0              | 1.082406                | 1.565417  | -0.268931 |
| 11               | 6                | 0              | -0.367980               | 1.321686  | -0.425859 |
| 12               | 6                | 0              | -1.033085               | 0.261189  | 0.071429  |



|    |   |   |           |           |           |
|----|---|---|-----------|-----------|-----------|
| 13 | 6 | 0 | -2.482333 | 0.058695  | 0.101994  |
| 14 | 6 | 0 | -3.415546 | 0.990563  | -0.402995 |
| 15 | 6 | 0 | -4.782334 | 0.746168  | -0.354255 |
| 16 | 6 | 0 | -5.260572 | -0.447046 | 0.207440  |
| 17 | 6 | 0 | -4.359873 | -1.388769 | 0.715996  |
| 18 | 6 | 0 | -2.990385 | -1.130039 | 0.660225  |
| 19 | 8 | 0 | -6.618267 | -0.629265 | 0.228671  |
| 20 | 8 | 0 | 1.377036  | 2.798151  | -0.087148 |
| 21 | 1 | 0 | 5.289346  | 0.222235  | 1.094032  |
| 22 | 1 | 0 | 2.888389  | -2.756134 | -0.910331 |
| 23 | 1 | 0 | 4.941398  | -3.129371 | 0.035909  |
| 24 | 1 | 0 | 2.804109  | 2.678479  | 0.516677  |
| 25 | 1 | 0 | -0.899604 | 2.179099  | -0.832510 |
| 26 | 1 | 0 | -0.447545 | -0.548777 | 0.497330  |
| 27 | 1 | 0 | -3.070428 | 1.921745  | -0.840527 |
| 28 | 1 | 0 | -5.493002 | 1.467637  | -0.744723 |
| 29 | 1 | 0 | -4.725170 | -2.315329 | 1.151287  |
| 30 | 1 | 0 | -2.298334 | -1.868499 | 1.055982  |
| 31 | 1 | 0 | -6.838318 | -1.479446 | 0.635363  |

### TS2-o

| Center Number | Atomic Number | Atomic Type | Coordinates (Angstroms) |           |           |
|---------------|---------------|-------------|-------------------------|-----------|-----------|
|               |               |             | X                       | Y         | Z         |
| 1             | 6             | 0           | 3.303909                | -1.851598 | 1.486873  |
| 2             | 6             | 0           | 3.205832                | -3.063287 | 2.176709  |
| 3             | 6             | 0           | 3.990799                | -4.134234 | 1.742154  |
| 4             | 6             | 0           | 4.934639                | -4.008432 | 0.681802  |
| 5             | 6             | 0           | 5.015199                | -2.742414 | -0.010206 |
| 6             | 6             | 0           | 4.164274                | -1.687792 | 0.402753  |
| 7             | 8             | 0           | 2.509098                | -0.819878 | 1.931871  |
| 8             | 8             | 0           | 3.823127                | -5.337443 | 2.344025  |
| 9             | 8             | 0           | 5.833593                | -2.517000 | -1.020970 |
| 10            | 6             | 0           | 5.580425                | -5.229006 | 0.145528  |
| 11            | 6             | 0           | 6.592867                | -5.067518 | -0.819012 |
| 12            | 6             | 0           | 7.225380                | -3.809113 | -0.935522 |
| 13            | 6             | 0           | 8.124535                | -3.486912 | -2.061657 |
| 14            | 6             | 0           | 7.961440                | -4.054141 | -3.339662 |
| 15            | 6             | 0           | 8.818199                | -3.734267 | -4.388150 |
| 16            | 6             | 0           | 9.863505                | -2.824523 | -4.178114 |
| 17            | 6             | 0           | 10.039532               | -2.236549 | -2.920383 |
| 18            | 6             | 0           | 9.169874                | -2.566545 | -1.880588 |
| 19            | 8             | 0           | 10.678024               | -2.544545 | -5.244085 |
| 20            | 8             | 0           | 5.120416                | -6.386397 | 0.499554  |
| 21            | 1             | 0           | 2.502923                | -3.189601 | 2.992419  |
| 22            | 1             | 0           | 4.231969                | -0.734569 | -0.114609 |
| 23            | 1             | 0           | 2.636366                | -0.046259 | 1.364730  |
| 24            | 1             | 0           | 4.298476                | -5.991378 | 1.714854  |
| 25            | 1             | 0           | 6.799790                | -5.876254 | -1.512673 |
| 26            | 1             | 0           | 7.515867                | -3.312639 | -0.010775 |
| 27            | 1             | 0           | 7.145857                | -4.748106 | -3.516197 |
| 28            | 1             | 0           | 8.686941                | -4.173560 | -5.372072 |
| 29            | 1             | 0           | 10.846368               | -1.526387 | -2.757070 |
| 30            | 1             | 0           | 9.308521                | -2.103010 | -0.907474 |
| 31            | 1             | 0           | 11.358443               | -1.906322 | -4.986473 |

### INT2-o

| Center Number | Atomic Number | Atomic Type | Coordinates (Angstroms) |           |           |
|---------------|---------------|-------------|-------------------------|-----------|-----------|
|               |               |             | X                       | Y         | Z         |
| 1             | 6             | 0           | 3.553738                | -1.733734 | -0.152251 |
| 2             | 6             | 0           | 4.200339                | -0.498254 | -0.084470 |
| 3             | 6             | 0           | 3.426926                | 0.667777  | 0.010111  |
| 4             | 6             | 0           | 2.013907                | 0.600210  | 0.076553  |
| 5             | 6             | 0           | 1.405122                | -0.663359 | -0.002405 |
| 6             | 6             | 0           | 2.156986                | -1.837355 | -0.119654 |
| 7             | 8             | 0           | 4.354512                | -2.850336 | -0.245484 |
| 8             | 8             | 0           | 4.024164                | 1.879319  | 0.012866  |
| 9             | 8             | 0           | 0.042787                | -0.781255 | -0.027359 |
| 10            | 6             | 0           | 1.184442                | 1.833996  | 0.076335  |

|    |   |   |           |           |           |
|----|---|---|-----------|-----------|-----------|
| 11 | 6 | 0 | -0.163949 | 1.661511  | 0.246112  |
| 12 | 6 | 0 | -0.689665 | 0.311378  | 0.648082  |
| 13 | 6 | 0 | -2.153718 | 0.094505  | 0.342490  |
| 14 | 6 | 0 | -2.675548 | 0.388007  | -0.927007 |
| 15 | 6 | 0 | -4.019583 | 0.171888  | -1.222959 |
| 16 | 6 | 0 | -4.872220 | -0.341413 | -0.236765 |
| 17 | 6 | 0 | -4.373358 | -0.639537 | 1.034946  |
| 18 | 6 | 0 | -3.019234 | -0.423335 | 1.310975  |
| 19 | 8 | 0 | -6.189532 | -0.528683 | -0.579205 |
| 20 | 8 | 0 | 1.815083  | 2.975446  | -0.121430 |
| 21 | 1 | 0 | 5.282077  | -0.437604 | -0.129287 |
| 22 | 1 | 0 | 1.655347  | -2.798883 | -0.170302 |
| 23 | 1 | 0 | 3.805441  | -3.644253 | -0.306245 |
| 24 | 1 | 0 | 3.207116  | 2.541680  | -0.048035 |
| 25 | 1 | 0 | -0.847873 | 2.504218  | 0.230308  |
| 26 | 1 | 0 | -0.532320 | 0.112137  | 1.724465  |
| 27 | 1 | 0 | -2.014759 | 0.793948  | -1.687207 |
| 28 | 1 | 0 | -4.422259 | 0.398332  | -2.205377 |
| 29 | 1 | 0 | -5.033820 | -1.037412 | 1.801398  |
| 30 | 1 | 0 | -2.636102 | -0.661862 | 2.300057  |
| 31 | 1 | 0 | -6.684059 | -0.879930 | 0.174574  |

### INT1-w

| Center<br>Number | Atomic<br>Number | Atomic<br>Type | Coordinates (Angstroms) |           |           |
|------------------|------------------|----------------|-------------------------|-----------|-----------|
|                  |                  |                | X                       | Y         | Z         |
| 1                | 6                | 0              | 4.125604                | -1.392715 | 0.151976  |
| 2                | 6                | 0              | 4.344603                | -0.082653 | 0.619112  |
| 3                | 6                | 0              | 3.356569                | 0.867409  | 0.403509  |
| 4                | 6                | 0              | 2.097579                | 0.547530  | -0.225310 |
| 5                | 6                | 0              | 1.934838                | -0.797645 | -0.809642 |
| 6                | 6                | 0              | 2.979584                | -1.747801 | -0.536485 |
| 7                | 8                | 0              | 5.135813                | -2.290624 | 0.399315  |
| 8                | 8                | 0              | 3.604912                | 2.127797  | 0.842854  |
| 9                | 8                | 0              | 0.952216                | -1.124876 | -1.549663 |
| 10               | 6                | 0              | 1.086952                | 1.581925  | -0.271257 |
| 11               | 6                | 0              | -0.364128               | 1.347487  | -0.416293 |
| 12               | 6                | 0              | -1.025131               | 0.281280  | 0.077238  |
| 13               | 6                | 0              | -2.472170               | 0.070751  | 0.110014  |
| 14               | 6                | 0              | -3.411120               | 0.998080  | -0.393751 |
| 15               | 6                | 0              | -4.775734               | 0.742901  | -0.347849 |
| 16               | 6                | 0              | -5.246026               | -0.456578 | 0.208989  |
| 17               | 6                | 0              | -4.339060               | -1.393419 | 0.717059  |
| 18               | 6                | 0              | -2.971938               | -1.123777 | 0.664694  |
| 19               | 8                | 0              | -6.600550               | -0.648559 | 0.225283  |
| 20               | 8                | 0              | 1.397594                | 2.811520  | -0.094797 |
| 21               | 1                | 0              | 5.268069                | 0.185492  | 1.118730  |
| 22               | 1                | 0              | 2.860135                | -2.751848 | -0.936030 |
| 23               | 1                | 0              | 4.899775                | -3.156168 | 0.035517  |
| 24               | 1                | 0              | 2.819525                | 2.673507  | 0.527525  |
| 25               | 1                | 0              | -0.898819               | 2.208013  | -0.811998 |
| 26               | 1                | 0              | -0.434688               | -0.528555 | 0.496904  |
| 27               | 1                | 0              | -3.072926               | 1.933236  | -0.828219 |
| 28               | 1                | 0              | -5.490964               | 1.460410  | -0.737189 |
| 29               | 1                | 0              | -4.698226               | -2.323478 | 1.149216  |
| 30               | 1                | 0              | -2.275651               | -1.857960 | 1.061057  |
| 31               | 1                | 0              | -6.818641               | -1.501356 | 0.628550  |

### TS2-w

| Center<br>Number | Atomic<br>Number | Atomic<br>Type | Coordinates (Angstroms) |           |           |
|------------------|------------------|----------------|-------------------------|-----------|-----------|
|                  |                  |                | X                       | Y         | Z         |
| 1                | 6                | 0              | 3.308016                | -1.848771 | 1.490834  |
| 2                | 6                | 0              | 3.211733                | -3.061437 | 2.180784  |
| 3                | 6                | 0              | 3.992195                | -4.133210 | 1.741971  |
| 4                | 6                | 0              | 4.930182                | -4.009278 | 0.676660  |
| 5                | 6                | 0              | 5.008558                | -2.743510 | -0.015696 |
| 6                | 6                | 0              | 4.162606                | -1.687014 | 0.401221  |
| 7                | 8                | 0              | 2.518408                | -0.818101 | 1.941835  |
| 8                | 8                | 0              | 3.826762                | -5.337294 | 2.345342  |

|    |   |   |           |           |           |
|----|---|---|-----------|-----------|-----------|
| 9  | 8 | 0 | 5.821599  | -2.523284 | -1.033011 |
| 10 | 6 | 0 | 5.574541  | -5.229309 | 0.138228  |
| 11 | 6 | 0 | 6.588753  | -5.069345 | -0.822549 |
| 12 | 6 | 0 | 7.222534  | -3.810156 | -0.940118 |
| 13 | 6 | 0 | 8.123254  | -3.488171 | -2.063328 |
| 14 | 6 | 0 | 7.967766  | -4.061688 | -3.339922 |
| 15 | 6 | 0 | 8.826122  | -3.740096 | -4.386267 |
| 16 | 6 | 0 | 9.866239  | -2.823574 | -4.175636 |
| 17 | 6 | 0 | 10.034995 | -2.230057 | -2.918847 |
| 18 | 6 | 0 | 9.163607  | -2.561298 | -1.881381 |
| 19 | 8 | 0 | 10.681248 | -2.544033 | -5.238953 |
| 20 | 8 | 0 | 5.109875  | -6.387658 | 0.489951  |
| 21 | 1 | 0 | 2.514468  | -3.185536 | 3.001779  |
| 22 | 1 | 0 | 4.227711  | -0.733706 | -0.116003 |
| 23 | 1 | 0 | 2.643646  | -0.039920 | 1.379902  |
| 24 | 1 | 0 | 4.296502  | -5.991370 | 1.713066  |
| 25 | 1 | 0 | 6.801446  | -5.879848 | -1.512543 |
| 26 | 1 | 0 | 7.507333  | -3.310753 | -0.015353 |
| 27 | 1 | 0 | 7.158362  | -4.762642 | -3.518064 |
| 28 | 1 | 0 | 8.700909  | -4.184308 | -5.368735 |
| 29 | 1 | 0 | 10.837627 | -1.515689 | -2.755079 |
| 30 | 1 | 0 | 9.297651  | -2.094309 | -0.909255 |
| 31 | 1 | 0 | 11.361542 | -1.904316 | -4.983253 |

## INT2-w

| Center<br>Number | Atomic<br>Number | Atomic<br>Type | Coordinates (Angstroms) |           |           |
|------------------|------------------|----------------|-------------------------|-----------|-----------|
|                  |                  |                | X                       | Y         | Z         |
| 1                | 6                | 0              | 3.548921                | -1.739022 | -0.160435 |
| 2                | 6                | 0              | 4.198925                | -0.505019 | -0.082140 |
| 3                | 6                | 0              | 3.428820                | 0.661822  | 0.016899  |
| 4                | 6                | 0              | 2.015707                | 0.599674  | 0.075796  |
| 5                | 6                | 0              | 1.403325                | -0.662271 | -0.013596 |
| 6                | 6                | 0              | 2.151396                | -1.837744 | -0.135365 |
| 7                | 8                | 0              | 4.347348                | -2.854714 | -0.256518 |
| 8                | 8                | 0              | 4.031628                | 1.872836  | 0.031822  |
| 9                | 8                | 0              | 0.040440                | -0.773614 | -0.045961 |
| 10               | 6                | 0              | 1.189005                | 1.834798  | 0.080978  |
| 11               | 6                | 0              | -0.159281               | 1.665934  | 0.249952  |
| 12               | 6                | 0              | -0.689598               | 0.314297  | 0.642549  |
| 13               | 6                | 0              | -2.154553               | 0.101398  | 0.340967  |
| 14               | 6                | 0              | -2.690096               | 0.434273  | -0.913080 |
| 15               | 6                | 0              | -4.034456               | 0.214843  | -1.205471 |
| 16               | 6                | 0              | -4.873801               | -0.342231 | -0.231232 |
| 17               | 6                | 0              | -4.361312               | -0.678539 | 1.026022  |
| 18               | 6                | 0              | -3.007444               | -0.458170 | 1.298289  |
| 19               | 8                | 0              | -6.190161               | -0.531540 | -0.570682 |
| 20               | 8                | 0              | 1.822807                | 2.977767  | -0.111486 |
| 21               | 1                | 0              | 5.281196                | -0.447974 | -0.120544 |
| 22               | 1                | 0              | 1.647782                | -2.797606 | -0.194051 |
| 23               | 1                | 0              | 3.800525                | -3.650591 | -0.317893 |
| 24               | 1                | 0              | 3.220781                | 2.537336  | -0.029676 |
| 25               | 1                | 0              | -0.841077               | 2.510513  | 0.239220  |
| 26               | 1                | 0              | -0.527429               | 0.106210  | 1.715924  |
| 27               | 1                | 0              | -2.041769               | 0.873550  | -1.665473 |
| 28               | 1                | 0              | -4.447074               | 0.471871  | -2.176163 |
| 29               | 1                | 0              | -5.011325               | -1.108253 | 1.783733  |
| 30               | 1                | 0              | -2.614510               | -0.726611 | 2.275744  |
| 31               | 1                | 0              | -6.676947               | -0.918581 | 0.170966  |

## INT1-1w

| Center<br>Number | Atomic<br>Number | Atomic<br>Type | Coordinates (Angstroms) |           |           |
|------------------|------------------|----------------|-------------------------|-----------|-----------|
|                  |                  |                | X                       | Y         | Z         |
| 1                | 6                | 0              | 2.854803                | 0.641972  | 1.085377  |
| 2                | 6                | 0              | 2.349859                | -0.351251 | 0.219366  |
| 3                | 6                | 0              | 3.278569                | -1.064585 | -0.566750 |
| 4                | 6                | 0              | 4.642456                | -0.803928 | -0.489353 |
| 5                | 6                | 0              | 5.117278                | 0.189877  | 0.381384  |
| 6                | 6                | 0              | 4.217601                | 0.914497  | 1.171191  |

|    |   |   |           |           |           |
|----|---|---|-----------|-----------|-----------|
| 7  | 6 | 0 | 0.905641  | -0.573426 | 0.162364  |
| 8  | 6 | 0 | 0.250214  | -1.555918 | -0.487102 |
| 9  | 6 | 0 | -1.207454 | -1.770166 | -0.388436 |
| 10 | 8 | 0 | -1.572556 | -2.990096 | -0.330676 |
| 11 | 8 | 0 | 6.444631  | 0.495899  | 0.497517  |
| 12 | 6 | 0 | -2.170510 | -0.694680 | -0.252275 |
| 13 | 6 | 0 | -1.946066 | 0.666429  | -0.743049 |
| 14 | 6 | 0 | -2.897016 | 1.662156  | -0.361451 |
| 15 | 6 | 0 | -4.041337 | 1.330823  | 0.350187  |
| 16 | 6 | 0 | -4.332950 | 0.007426  | 0.724510  |
| 17 | 6 | 0 | -3.420438 | -0.986699 | 0.396872  |
| 18 | 8 | 0 | -0.968864 | 0.966111  | -1.522257 |
| 19 | 8 | 0 | -3.733741 | -2.260318 | 0.746740  |
| 20 | 8 | 0 | -4.975511 | 2.271661  | 0.702265  |
| 21 | 8 | 0 | 0.943116  | 2.744969  | -1.020218 |
| 22 | 1 | 0 | -5.254578 | -0.236697 | 1.239479  |
| 23 | 1 | 0 | -2.727447 | 2.681114  | -0.699603 |
| 24 | 1 | 0 | -4.695559 | 3.145521  | 0.393710  |
| 25 | 1 | 0 | -3.005047 | -2.829700 | 0.361802  |
| 26 | 1 | 0 | 0.782731  | -2.354094 | -0.998756 |
| 27 | 1 | 0 | 0.308668  | 0.149642  | 0.713758  |
| 28 | 1 | 0 | 2.163828  | 1.207607  | 1.705108  |
| 29 | 1 | 0 | 4.594164  | 1.681381  | 1.840130  |
| 30 | 1 | 0 | 5.340465  | -1.363407 | -1.106350 |
| 31 | 1 | 0 | 2.934437  | -1.828420 | -1.256428 |
| 32 | 1 | 0 | 6.975929  | -0.056939 | -0.093625 |
| 33 | 1 | 0 | 0.201135  | 2.100650  | -1.191154 |
| 34 | 1 | 0 | 1.680784  | 2.202345  | -0.712058 |

### TS2-1w

| Center<br>Number | Atomic<br>Number | Atomic<br>Type | Coordinates (Angstroms) |           |           |
|------------------|------------------|----------------|-------------------------|-----------|-----------|
|                  |                  |                | X                       | Y         | Z         |
| 1                | 6                | 0              | -1.485114               | 0.548946  | -0.206314 |
| 2                | 6                | 0              | -2.117112               | -0.709364 | 0.068664  |
| 3                | 6                | 0              | -3.532655               | -0.725738 | 0.202107  |
| 4                | 6                | 0              | -4.297804               | 0.442952  | 0.152212  |
| 5                | 6                | 0              | -3.648464               | 1.652238  | -0.105951 |
| 6                | 6                | 0              | -2.266189               | 1.716447  | -0.303286 |
| 7                | 6                | 0              | -1.375746               | -1.993454 | -0.038913 |
| 8                | 8                | 0              | -2.050451               | -3.078360 | -0.259875 |
| 9                | 8                | 0              | -4.174856               | -1.909698 | 0.359962  |
| 10               | 8                | 0              | -4.433976               | 2.777100  | -0.153093 |
| 11               | 8                | 0              | -0.167527               | 0.653904  | -0.398997 |
| 12               | 6                | 0              | 0.023594                | -1.939937 | -0.002391 |
| 13               | 6                | 0              | 0.644524                | -0.755320 | 0.485483  |
| 14               | 6                | 0              | 2.090016                | -0.510160 | 0.311821  |
| 15               | 6                | 0              | 2.781105                | -0.937031 | -0.834453 |
| 16               | 6                | 0              | 4.135377                | -0.658890 | -1.005777 |
| 17               | 6                | 0              | 4.825269                | 0.065695  | -0.023032 |
| 18               | 6                | 0              | 4.154726                | 0.507673  | 1.124918  |
| 19               | 6                | 0              | 2.800129                | 0.222107  | 1.280297  |
| 20               | 8                | 0              | 6.152505                | 0.376204  | -0.131085 |
| 21               | 8                | 0              | 1.401360                | 2.893058  | -0.234645 |
| 22               | 1                | 0              | -5.374962               | 0.401217  | 0.266521  |
| 23               | 1                | 0              | -1.774349               | 2.664529  | -0.499287 |
| 24               | 1                | 0              | -3.893056               | 3.551330  | -0.364706 |
| 25               | 1                | 0              | -3.461988               | -2.605584 | 0.132852  |
| 26               | 1                | 0              | 0.607571                | -2.751024 | -0.424556 |
| 27               | 1                | 0              | 0.260323                | -0.351340 | 1.423295  |
| 28               | 1                | 0              | 2.282136                | 0.574995  | 2.168092  |
| 29               | 1                | 0              | 4.700386                | 1.068839  | 1.876473  |
| 30               | 1                | 0              | 4.655060                | -0.992281 | -1.900160 |
| 31               | 1                | 0              | 2.249412                | -1.480477 | -1.609019 |
| 32               | 1                | 0              | 6.517506                | 0.027392  | -0.957158 |
| 33               | 1                | 0              | 0.794273                | 2.117747  | -0.294883 |
| 34               | 1                | 0              | 2.231320                | 2.519995  | 0.092090  |

### INT2-1w

| Center | Atomic | Atomic | Coordinates (Angstroms) |  |  |
|--------|--------|--------|-------------------------|--|--|
|--------|--------|--------|-------------------------|--|--|

| Number | Number | Type | X         | Y         | Z         |
|--------|--------|------|-----------|-----------|-----------|
| 1      | 6      | 0    | 2.873323  | 0.160917  | 1.336682  |
| 2      | 6      | 0    | 2.035681  | -0.448206 | 0.392294  |
| 3      | 6      | 0    | 2.587011  | -0.829882 | -0.838072 |
| 4      | 6      | 0    | 3.934458  | -0.610616 | -1.124720 |
| 5      | 6      | 0    | 4.754873  | 0.004354  | -0.169136 |
| 6      | 6      | 0    | 4.223828  | 0.389668  | 1.067281  |
| 7      | 6      | 0    | 0.560275  | -0.608931 | 0.668411  |
| 8      | 6      | 0    | -0.040610 | -1.912708 | 0.230563  |
| 9      | 6      | 0    | -1.395211 | -1.997516 | 0.042478  |
| 10     | 8      | 0    | -2.090101 | -3.094871 | -0.189286 |
| 11     | 8      | 0    | 6.084974  | 0.252500  | -0.386345 |
| 12     | 6      | 0    | -2.151755 | -0.717162 | 0.064182  |
| 13     | 6      | 0    | -1.474558 | 0.511084  | 0.012896  |
| 14     | 6      | 0    | -2.148438 | 1.731030  | -0.075239 |
| 15     | 6      | 0    | -3.549912 | 1.712398  | -0.107092 |
| 16     | 6      | 0    | -4.267348 | 0.514633  | -0.068577 |
| 17     | 6      | 0    | -3.566062 | -0.697035 | -0.001309 |
| 18     | 8      | 0    | -0.102546 | 0.535551  | -0.015395 |
| 19     | 8      | 0    | -4.236484 | -1.870728 | -0.024012 |
| 20     | 8      | 0    | -4.283336 | 2.872605  | -0.171595 |
| 21     | 8      | 0    | 1.567212  | 2.821206  | -0.326294 |
| 22     | 1      | 0    | -5.350876 | 0.519771  | -0.112558 |
| 23     | 1      | 0    | -1.591599 | 2.662136  | -0.103169 |
| 24     | 1      | 0    | -3.693724 | 3.639123  | -0.206320 |
| 25     | 1      | 0    | -3.466517 | -2.578419 | -0.101455 |
| 26     | 1      | 0    | 0.591092  | -2.794698 | 0.201328  |
| 27     | 1      | 0    | 0.383930  | -0.407266 | 1.739676  |
| 28     | 1      | 0    | 2.463804  | 0.471275  | 2.294581  |
| 29     | 1      | 0    | 4.870217  | 0.861403  | 1.800385  |
| 30     | 1      | 0    | 4.347370  | -0.910903 | -2.084282 |
| 31     | 1      | 0    | 1.950581  | -1.300601 | -1.581223 |
| 32     | 1      | 0    | 6.344429  | -0.043813 | -1.270526 |
| 33     | 1      | 0    | 0.960398  | 2.060979  | -0.232631 |
| 34     | 1      | 0    | 2.419802  | 2.478736  | -0.024236 |

**INT1-1wb**

| Center Number | Atomic Number | Atomic Type | Coordinates (Angstroms) |           |           |
|---------------|---------------|-------------|-------------------------|-----------|-----------|
|               |               |             | X                       | Y         | Z         |
| 1             | 6             | 0           | -1.899859               | 0.669461  | -0.432784 |
| 2             | 6             | 0           | -2.033755               | -0.775450 | -0.227191 |
| 3             | 6             | 0           | -3.284597               | -1.270783 | 0.290311  |
| 4             | 6             | 0           | -4.293507               | -0.426093 | 0.734412  |
| 5             | 6             | 0           | -4.103408               | 0.960721  | 0.616426  |
| 6             | 6             | 0           | -2.959630               | 1.500633  | 0.048596  |
| 7             | 6             | 0           | -1.002985               | -1.746214 | -0.547506 |
| 8             | 8             | 0           | -1.298672               | -2.978551 | -0.708344 |
| 9             | 8             | 0           | -3.509395               | -2.604546 | 0.389577  |
| 10            | 8             | 0           | -5.129856               | 1.748448  | 1.072099  |
| 11            | 8             | 0           | -0.899060               | 1.192329  | -1.046009 |
| 12            | 6             | 0           | 0.440797                | -1.456059 | -0.626393 |
| 13            | 6             | 0           | 1.085371                | -0.542647 | 0.127643  |
| 14            | 6             | 0           | 2.527818                | -0.313317 | 0.199619  |
| 15            | 6             | 0           | 3.475697                | -1.073862 | -0.516381 |
| 16            | 6             | 0           | 4.837261                | -0.803413 | -0.427254 |
| 17            | 6             | 0           | 5.289951                | 0.244457  | 0.389793  |
| 18            | 6             | 0           | 4.371376                | 1.012508  | 1.114167  |
| 19            | 6             | 0           | 3.011686                | 0.730135  | 1.016014  |
| 20            | 8             | 0           | 6.614814                | 0.559173  | 0.518955  |
| 21            | 8             | 0           | -0.667096               | 3.789403  | -1.485909 |
| 22            | 1             | 0           | -5.212104               | -0.832128 | 1.141151  |
| 23            | 1             | 0           | -2.858675               | 2.575282  | -0.073429 |
| 24            | 1             | 0           | -4.914109               | 2.682603  | 0.937189  |
| 25            | 1             | 0           | -2.721530               | -3.038183 | -0.060601 |
| 26            | 1             | 0           | 0.988039                | -2.168219 | -1.239470 |
| 27            | 1             | 0           | 0.485041                | 0.112295  | 0.752905  |
| 28            | 1             | 0           | 2.305406                | 1.333084  | 1.580446  |
| 29            | 1             | 0           | 4.732068                | 1.819728  | 1.743390  |
| 30            | 1             | 0           | 5.550558                | -1.402904 | -0.986580 |
| 31            | 1             | 0           | 3.150859                | -1.891109 | -1.152132 |
| 32            | 1             | 0           | 7.159333                | -0.029535 | -0.023458 |
| 33            | 1             | 0           | -0.800307               | 2.809221  | -1.314467 |

34            1            0            -1.523764      4.119352      -1.784720

**TS2-1wb**

| Center<br>Number | Atomic<br>Number | Atomic<br>Type | Coordinates (Angstroms) |           |           |
|------------------|------------------|----------------|-------------------------|-----------|-----------|
|                  |                  |                | X                       | Y         | Z         |
| 1                | 6                | 0              | 2.794643                | -0.795895 | -0.743854 |
| 2                | 6                | 0              | 2.092076                | -0.497008 | 0.436595  |
| 3                | 6                | 0              | 2.785980                | 0.151204  | 1.473385  |
| 4                | 6                | 0              | 4.135397                | 0.473432  | 1.353984  |
| 5                | 6                | 0              | 4.817374                | 0.161897  | 0.171275  |
| 6                | 6                | 0              | 4.143483                | -0.473811 | -0.882503 |
| 7                | 6                | 0              | 0.648948                | -0.778687 | 0.576782  |
| 8                | 6                | 0              | 0.036366                | -1.873904 | -0.093622 |
| 9                | 6                | 0              | -1.361797               | -1.929578 | -0.163353 |
| 10               | 8                | 0              | -2.017585               | -2.980169 | -0.549575 |
| 11               | 8                | 0              | 6.138451                | 0.507018  | 0.099446  |
| 12               | 6                | 0              | -2.119755               | -0.678643 | 0.095422  |
| 13               | 6                | 0              | -3.541645               | -0.721552 | 0.150364  |
| 14               | 6                | 0              | -4.319756               | 0.437402  | 0.207243  |
| 15               | 6                | 0              | -3.675935               | 1.675248  | 0.134853  |
| 16               | 6                | 0              | -2.287253               | 1.774872  | 0.023414  |
| 17               | 6                | 0              | -1.492666               | 0.610918  | 0.024152  |
| 18               | 8                | 0              | -4.174725               | -1.920307 | 0.121318  |
| 19               | 8                | 0              | -0.170275               | 0.760766  | -0.053602 |
| 20               | 8                | 0              | -4.475680               | 2.790158  | 0.184266  |
| 21               | 1                | 0              | -5.400680               | 0.372618  | 0.256994  |
| 22               | 1                | 0              | -1.797772               | 2.743288  | -0.020285 |
| 23               | 1                | 0              | -3.936658               | 3.589343  | 0.097471  |
| 24               | 1                | 0              | -3.440801               | -2.574992 | -0.162075 |
| 25               | 1                | 0              | 0.627511                | -2.612330 | -0.624963 |
| 26               | 1                | 0              | 0.263789                | -0.526741 | 1.565395  |
| 27               | 1                | 0              | 2.258145                | 0.407754  | 2.387927  |
| 28               | 1                | 0              | 4.667893                | 0.969216  | 2.159075  |
| 29               | 1                | 0              | 4.671036                | -0.708640 | -1.803070 |
| 30               | 1                | 0              | 2.277144                | -1.269034 | -1.572190 |
| 31               | 1                | 0              | 6.511263                | 0.253018  | -0.757240 |
| 32               | 1                | 0              | 0.834925                | 1.715919  | -1.141836 |
| 33               | 8                | 0              | 1.480960                | 2.189335  | -1.715390 |
| 34               | 1                | 0              | 2.282258                | 1.650820  | -1.661734 |

**INT2-1wb**

| Center<br>Number | Atomic<br>Number | Atomic<br>Type | Coordinates (Angstroms) |           |           |
|------------------|------------------|----------------|-------------------------|-----------|-----------|
|                  |                  |                | X                       | Y         | Z         |
| 1                | 6                | 0              | -1.477276               | 0.525752  | 0.147849  |
| 2                | 6                | 0              | -2.143137               | -0.706451 | 0.062058  |
| 3                | 6                | 0              | -3.555321               | -0.690416 | -0.042572 |
| 4                | 6                | 0              | -4.266316               | 0.517228  | -0.018262 |
| 5                | 6                | 0              | -3.560043               | 1.718533  | 0.076012  |
| 6                | 6                | 0              | -2.160548               | 1.743834  | 0.153580  |
| 7                | 6                | 0              | -1.373813               | -1.973086 | -0.059209 |
| 8                | 8                | 0              | -2.053443               | -3.050795 | -0.402593 |
| 9                | 8                | 0              | -4.213268               | -1.861536 | -0.193826 |
| 10               | 8                | 0              | -4.302962               | 2.874401  | 0.096198  |
| 11               | 8                | 0              | -0.105828               | 0.568332  | 0.168254  |
| 12               | 6                | 0              | -0.024045               | -1.895748 | 0.161301  |
| 13               | 6                | 0              | 0.562982                | -0.636468 | 0.729969  |
| 14               | 6                | 0              | 2.038231                | -0.438703 | 0.473756  |
| 15               | 6                | 0              | 2.597432                | -0.717144 | -0.780868 |
| 16               | 6                | 0              | 3.943041                | -0.456863 | -1.045705 |
| 17               | 6                | 0              | 4.755000                | 0.083719  | -0.038454 |
| 18               | 6                | 0              | 4.216217                | 0.360048  | 1.222976  |
| 19               | 6                | 0              | 2.866744                | 0.102388  | 1.465849  |
| 20               | 8                | 0              | 6.083365                | 0.360450  | -0.229821 |
| 21               | 8                | 0              | 1.511565                | 2.436409  | -1.249731 |
| 22               | 1                | 0              | -5.348075               | 0.518520  | -0.094416 |
| 23               | 1                | 0              | -1.610654               | 2.676216  | 0.231772  |
| 24               | 1                | 0              | -3.720149               | 3.645272  | 0.145663  |
| 25               | 1                | 0              | -3.433487               | -2.554150 | -0.310924 |

|    |   |   |          |           |           |
|----|---|---|----------|-----------|-----------|
| 26 | 1 | 0 | 0.613936 | -2.768413 | 0.064305  |
| 27 | 1 | 0 | 0.384536 | -0.546223 | 1.815792  |
| 28 | 1 | 0 | 2.450720 | 0.331423  | 2.443607  |
| 29 | 1 | 0 | 4.855958 | 0.776351  | 1.994515  |
| 30 | 1 | 0 | 4.361513 | -0.674389 | -2.024925 |
| 31 | 1 | 0 | 1.968564 | -1.133414 | -1.561997 |
| 32 | 1 | 0 | 6.349800 | 0.133448  | -1.132265 |
| 33 | 1 | 0 | 0.927402 | 1.823634  | -0.762094 |
| 34 | 1 | 0 | 2.329620 | 1.933904  | -1.366550 |

### INT1-2w

| Center<br>Number | Atomic<br>Number | Atomic<br>Type | Coordinates (Angstroms) |           |           |
|------------------|------------------|----------------|-------------------------|-----------|-----------|
|                  |                  |                | X                       | Y         | Z         |
| 1                | 6                | 0              | -3.067760               | 0.942595  | -0.707629 |
| 2                | 6                | 0              | -2.722718               | -0.306602 | -0.150390 |
| 3                | 6                | 0              | -3.770725               | -1.113860 | 0.339388  |
| 4                | 6                | 0              | -5.095473               | -0.694209 | 0.280142  |
| 5                | 6                | 0              | -5.408917               | 0.556205  | -0.275931 |
| 6                | 6                | 0              | -4.389052               | 1.375859  | -0.772431 |
| 7                | 6                | 0              | -1.312278               | -0.686449 | -0.098156 |
| 8                | 6                | 0              | -0.784065               | -1.816532 | 0.415323  |
| 9                | 6                | 0              | 0.633580                | -2.205437 | 0.301134  |
| 10               | 8                | 0              | 0.827859                | -3.459925 | 0.160446  |
| 11               | 8                | 0              | -6.690946               | 1.024670  | -0.360466 |
| 12               | 6                | 0              | 1.748547                | -1.275808 | 0.256809  |
| 13               | 6                | 0              | 1.726333                | 0.077111  | 0.813870  |
| 14               | 6                | 0              | 2.887909                | 0.872731  | 0.620901  |
| 15               | 6                | 0              | 3.952200                | 0.457652  | -0.160825 |
| 16               | 6                | 0              | 4.031703                | -0.861164 | -0.641693 |
| 17               | 6                | 0              | 2.966813                | -1.717525 | -0.382458 |
| 18               | 8                | 0              | 0.730144                | 0.581373  | 1.464208  |
| 19               | 8                | 0              | 3.087274                | -2.998493 | -0.817140 |
| 20               | 8                | 0              | 4.961111                | 1.328729  | -0.473097 |
| 21               | 8                | 0              | 0.776089                | 3.162703  | 0.726899  |
| 22               | 8                | 0              | 3.314315                | 3.719685  | -0.491667 |
| 23               | 1                | 0              | 4.890612                | -1.207782 | -1.204683 |
| 24               | 1                | 0              | 2.901810                | 1.858095  | 1.063514  |
| 25               | 1                | 0              | 4.611631                | 2.237763  | -0.357726 |
| 26               | 1                | 0              | 2.264078                | -3.468381 | -0.485988 |
| 27               | 1                | 0              | -1.416947               | -2.607794 | 0.810335  |
| 28               | 1                | 0              | -0.628043               | 0.044750  | -0.517863 |
| 29               | 1                | 0              | -2.281612               | 1.585959  | -1.093993 |
| 30               | 1                | 0              | -4.642549               | 2.340094  | -1.200928 |
| 31               | 1                | 0              | -5.887977               | -1.331849 | 0.662715  |
| 32               | 1                | 0              | -3.554538               | -2.084680 | 0.773405  |
| 33               | 1                | 0              | -7.312969               | 0.383874  | 0.013280  |
| 34               | 1                | 0              | 0.701301                | 2.209533  | 1.039677  |
| 35               | 1                | 0              | 2.422524                | 3.561417  | -0.106012 |
| 36               | 1                | 0              | 3.528505                | 4.642802  | -0.305677 |
| 37               | 1                | 0              | -0.019173               | 3.338847  | 0.208157  |

### TS2-2w

| Center<br>Number | Atomic<br>Number | Atomic<br>Type | Coordinates (Angstroms) |           |           |
|------------------|------------------|----------------|-------------------------|-----------|-----------|
|                  |                  |                | X                       | Y         | Z         |
| 1                | 6                | 0              | -1.311259               | 0.030686  | -0.415216 |
| 2                | 6                | 0              | -1.793617               | -1.238637 | 0.041936  |
| 3                | 6                | 0              | -3.198135               | -1.388802 | 0.212412  |
| 4                | 6                | 0              | -4.085892               | -0.316742 | 0.069663  |
| 5                | 6                | 0              | -3.574748               | 0.913088  | -0.358071 |
| 6                | 6                | 0              | -2.225218               | 1.059760  | -0.683677 |
| 7                | 6                | 0              | -0.905318               | -2.425737 | 0.105960  |
| 8                | 8                | 0              | -1.442143               | -3.603913 | 0.040195  |
| 9                | 8                | 0              | -3.700672               | -2.608389 | 0.537734  |
| 10               | 8                | 0              | -4.418670               | 1.989493  | -0.440683 |
| 11               | 8                | 0              | -0.009565               | 0.297855  | -0.597642 |
| 12               | 6                | 0              | 0.476829                | -2.192279 | 0.126074  |
| 13               | 6                | 0              | 0.942495                | -0.887224 | 0.457489  |
| 14               | 6                | 0              | 2.354536                | -0.498925 | 0.267625  |

|    |   |   |           |           |           |
|----|---|---|-----------|-----------|-----------|
| 15 | 6 | 0 | 3.130255  | -1.007445 | -0.788019 |
| 16 | 6 | 0 | 4.454084  | -0.611482 | -0.966328 |
| 17 | 6 | 0 | 5.026306  | 0.315854  | -0.083201 |
| 18 | 6 | 0 | 4.269796  | 0.841170  | 0.971478  |
| 19 | 6 | 0 | 2.946945  | 0.437199  | 1.133529  |
| 20 | 8 | 0 | 6.318381  | 0.749938  | -0.204778 |
| 21 | 8 | 0 | 0.129876  | 2.961510  | 0.215146  |
| 22 | 8 | 0 | -2.533862 | 4.012110  | 0.264004  |
| 23 | 1 | 0 | -5.141669 | -0.443956 | 0.281472  |
| 24 | 1 | 0 | -1.860458 | 2.003490  | -1.062983 |
| 25 | 1 | 0 | -3.872862 | 2.802912  | -0.373354 |
| 26 | 1 | 0 | -2.917732 | -3.243022 | 0.391748  |
| 27 | 1 | 0 | 1.162336  | -2.973543 | -0.185195 |
| 28 | 1 | 0 | 0.494693  | -0.419130 | 1.335493  |
| 29 | 1 | 0 | 2.362857  | 0.850681  | 1.951537  |
| 30 | 1 | 0 | 4.724654  | 1.559506  | 1.645805  |
| 31 | 1 | 0 | 5.040627  | -1.012684 | -1.788709 |
| 32 | 1 | 0 | 2.690106  | -1.712859 | -1.485684 |
| 33 | 1 | 0 | 6.745845  | 0.335108  | -0.967824 |
| 34 | 1 | 0 | 0.187896  | 2.008849  | -0.043147 |
| 35 | 1 | 0 | -1.608082 | 3.682296  | 0.287032  |
| 36 | 1 | 0 | -2.486666 | 4.926404  | -0.043654 |
| 37 | 1 | 0 | 0.689333  | 3.064197  | 0.995732  |

### INT2-2w

| Center<br>Number | Atomic<br>Number | Atomic<br>Type | Coordinates (Angstroms) |           |           |
|------------------|------------------|----------------|-------------------------|-----------|-----------|
|                  |                  |                | X                       | Y         | Z         |
| 1                | 6                | 0              | 3.058714                | 0.445622  | 1.151689  |
| 2                | 6                | 0              | 2.313896                | -0.370063 | 0.289723  |
| 3                | 6                | 0              | 2.940357                | -0.868653 | -0.860689 |
| 4                | 6                | 0              | 4.271631                | -0.565721 | -1.146680 |
| 5                | 6                | 0              | 5.000999                | 0.247523  | -0.268242 |
| 6                | 6                | 0              | 4.393758                | 0.754404  | 0.885319  |
| 7                | 6                | 0              | 0.863945                | -0.671431 | 0.578267  |
| 8                | 6                | 0              | 0.459106                | -2.106465 | 0.397981  |
| 9                | 6                | 0              | -0.870679               | -2.416417 | 0.266222  |
| 10               | 8                | 0              | -1.405680               | -3.621010 | 0.270163  |
| 11               | 8                | 0              | 6.314221                | 0.578887  | -0.486655 |
| 12               | 6                | 0              | -1.794200               | -1.271545 | 0.054235  |
| 13               | 6                | 0              | -1.286970               | -0.003862 | -0.269471 |
| 14               | 6                | 0              | -2.120185               | 1.060697  | -0.597413 |
| 15               | 6                | 0              | -3.506504               | 0.891717  | -0.493906 |
| 16               | 6                | 0              | -4.060337               | -0.356807 | -0.194011 |
| 17               | 6                | 0              | -3.200394               | -1.440143 | 0.043299  |
| 18               | 8                | 0              | 0.069577                | 0.226486  | -0.307634 |
| 19               | 8                | 0              | -3.710341               | -2.673724 | 0.275398  |
| 20               | 8                | 0              | -4.341324               | 1.964269  | -0.672840 |
| 21               | 8                | 0              | 0.078042                | 3.040878  | 0.553618  |
| 22               | 8                | 0              | -2.620968               | 4.021744  | 0.281265  |
| 23               | 1                | 0              | -5.135508               | -0.487289 | -0.135201 |
| 24               | 1                | 0              | -1.702871               | 2.013709  | -0.886549 |
| 25               | 1                | 0              | -3.823224               | 2.781560  | -0.505501 |
| 26               | 1                | 0              | -2.861662               | -3.277216 | 0.306401  |
| 27               | 1                | 0              | 1.211228                | -2.879266 | 0.520488  |
| 28               | 1                | 0              | 0.629366                | -0.301710 | 1.592648  |
| 29               | 1                | 0              | 2.591082                | 0.845389  | 2.048074  |
| 30               | 1                | 0              | 4.969758                | 1.381564  | 1.558307  |
| 31               | 1                | 0              | 4.744207                | -0.959834 | -2.042764 |
| 32               | 1                | 0              | 2.377441                | -1.503437 | -1.538404 |
| 33               | 1                | 0              | 6.632785                | 0.174469  | -1.306263 |
| 34               | 1                | 0              | 0.213186                | 2.102239  | 0.315691  |
| 35               | 1                | 0              | -1.695994               | 3.728795  | 0.426041  |
| 36               | 1                | 0              | -2.567006               | 4.927291  | -0.050766 |
| 37               | 1                | 0              | 0.570181                | 3.180352  | 1.373327  |

### INT1-3w

| Center<br>Number | Atomic<br>Number | Atomic<br>Type | Coordinates (Angstroms) |   |   |
|------------------|------------------|----------------|-------------------------|---|---|
|                  |                  |                | X                       | Y | Z |



|    |   |   |           |           |           |
|----|---|---|-----------|-----------|-----------|
| 1  | 6 | 0 | -3.263056 | -1.616882 | 0.396865  |
| 2  | 6 | 0 | -2.041355 | -1.340098 | -0.316468 |
| 3  | 6 | 0 | -1.867540 | -0.007254 | -0.893324 |
| 4  | 6 | 0 | -2.877640 | 0.951106  | -0.605251 |
| 5  | 6 | 0 | -3.930274 | 0.681875  | 0.252368  |
| 6  | 6 | 0 | -4.174591 | -0.620467 | 0.728398  |
| 7  | 6 | 0 | -1.040023 | -2.385687 | -0.379419 |
| 8  | 8 | 0 | -1.357202 | -3.612769 | -0.249037 |
| 9  | 8 | 0 | -0.871085 | 0.332266  | -1.637533 |
| 10 | 8 | 0 | -4.770947 | 1.688304  | 0.647667  |
| 11 | 8 | 0 | -3.526852 | -2.875805 | 0.837372  |
| 12 | 6 | 0 | 0.408645  | -2.109082 | -0.472677 |
| 13 | 6 | 0 | 0.994503  | -1.062857 | 0.142964  |
| 14 | 6 | 0 | 2.422187  | -0.756571 | 0.216771  |
| 15 | 6 | 0 | 2.865719  | 0.219694  | 1.134021  |
| 16 | 6 | 0 | 4.211107  | 0.567876  | 1.239257  |
| 17 | 6 | 0 | 5.153079  | -0.058161 | 0.412937  |
| 18 | 6 | 0 | 4.737892  | -1.031343 | -0.508425 |
| 19 | 6 | 0 | 3.391225  | -1.370441 | -0.601656 |
| 20 | 8 | 0 | 6.458314  | 0.323143  | 0.548075  |
| 21 | 8 | 0 | -0.464639 | 2.915083  | -0.848953 |
| 22 | 8 | 0 | -2.748645 | 3.790546  | 0.586713  |
| 23 | 8 | 0 | 2.357391  | 3.134122  | -0.399313 |
| 24 | 1 | 0 | -5.034485 | -0.843758 | 1.349334  |
| 25 | 1 | 0 | -2.779766 | 1.935679  | -1.040043 |
| 26 | 1 | 0 | -4.292994 | 2.534891  | 0.520659  |
| 27 | 1 | 0 | -2.795724 | -3.448905 | 0.468295  |
| 28 | 1 | 0 | 0.993061  | -2.900801 | -0.935648 |
| 29 | 1 | 0 | 0.347405  | -0.353195 | 0.653172  |
| 30 | 1 | 0 | 2.142066  | 0.705278  | 1.784033  |
| 31 | 1 | 0 | 4.541838  | 1.316472  | 1.951871  |
| 32 | 1 | 0 | 5.467179  | -1.511979 | -1.154925 |
| 33 | 1 | 0 | 3.091020  | -2.113107 | -1.333941 |
| 34 | 1 | 0 | 7.023496  | -0.168380 | -0.065464 |
| 35 | 1 | 0 | -0.560718 | 1.982673  | -1.188434 |
| 36 | 1 | 0 | -1.917421 | 3.520289  | 0.130067  |
| 37 | 1 | 0 | -2.824126 | 4.745557  | 0.465511  |
| 38 | 1 | 0 | 0.483928  | 3.031253  | -0.651552 |
| 39 | 1 | 0 | 2.733827  | 2.292887  | -0.095682 |
| 40 | 1 | 0 | 2.831485  | 3.345780  | -1.215345 |

-----

**TS2-3w**

| Center<br>Number | Atomic<br>Number | Atomic<br>Type | Coordinates (Angstroms) |           |           |
|------------------|------------------|----------------|-------------------------|-----------|-----------|
|                  |                  |                | X                       | Y         | Z         |
| 1                | 6                | 0              | 2.773116                | -0.105751 | 1.190251  |
| 2                | 6                | 0              | 2.096644                | -0.932413 | 0.277008  |
| 3                | 6                | 0              | 2.821287                | -1.448992 | -0.810471 |
| 4                | 6                | 0              | 4.175075                | -1.166018 | -0.977639 |
| 5                | 6                | 0              | 4.834917                | -0.352029 | -0.045325 |
| 6                | 6                | 0              | 4.130416                | 0.181514  | 1.043146  |
| 7                | 6                | 0              | 0.653727                | -1.194811 | 0.448861  |
| 8                | 6                | 0              | 0.065675                | -2.437936 | 0.087800  |
| 9                | 6                | 0              | -1.335912               | -2.528600 | 0.062583  |
| 10               | 8                | 0              | -1.988885               | -3.643209 | -0.027283 |
| 11               | 8                | 0              | 6.161131                | -0.039218 | -0.145700 |
| 12               | 6                | 0              | -2.097141               | -1.255651 | 0.024346  |
| 13               | 6                | 0              | -1.487754               | -0.034866 | -0.416190 |
| 14               | 6                | 0              | -2.291534               | 1.088921  | -0.657559 |
| 15               | 6                | 0              | -3.645459               | 1.079112  | -0.320292 |
| 16               | 6                | 0              | -4.280659               | -0.099008 | 0.088428  |
| 17               | 6                | 0              | -3.508713               | -1.260564 | 0.203255  |
| 18               | 8                | 0              | -0.169233               | 0.100958  | -0.602728 |
| 19               | 8                | 0              | -4.134369               | -2.427404 | 0.509945  |
| 20               | 8                | 0              | -4.369316               | 2.241160  | -0.371921 |
| 21               | 8                | 0              | 0.200518                | 2.697319  | 0.418551  |
| 22               | 8                | 0              | -2.260373               | 4.085082  | 0.240967  |
| 23               | 1                | 0              | -5.342506               | -0.119203 | 0.307109  |
| 24               | 1                | 0              | -1.828862               | 1.997311  | -1.015354 |
| 25               | 1                | 0              | -3.736667               | 2.990760  | -0.324987 |
| 26               | 1                | 0              | -3.425508               | -3.137287 | 0.345518  |
| 27               | 1                | 0              | 0.669623                | -3.272557 | -0.253168 |
| 28               | 1                | 0              | 0.240338                | -0.697196 | 1.327014  |
| 29               | 1                | 0              | 2.230374                | 0.319541  | 2.029983  |

|    |   |   |           |           |           |
|----|---|---|-----------|-----------|-----------|
| 30 | 1 | 0 | 4.655018  | 0.800938  | 1.764001  |
| 31 | 1 | 0 | 4.718828  | -1.568929 | -1.827873 |
| 32 | 1 | 0 | 2.315219  | -2.068786 | -1.543913 |
| 33 | 1 | 0 | 6.553160  | -0.461061 | -0.923999 |
| 34 | 1 | 0 | 0.149284  | 1.781471  | 0.060934  |
| 35 | 1 | 0 | -1.367902 | 3.670733  | 0.290542  |
| 36 | 1 | 0 | -2.126960 | 4.973149  | -0.114136 |
| 37 | 1 | 0 | 1.120992  | 2.978809  | 0.251066  |
| 38 | 8 | 0 | 2.964033  | 3.116903  | -0.098162 |
| 39 | 1 | 0 | 3.340029  | 2.236390  | 0.064885  |
| 40 | 1 | 0 | 3.185375  | 3.325750  | -1.016196 |

### INT2-3w

| Center<br>Number | Atomic<br>Number | Atomic<br>Type | Coordinates (Angstroms) |           |           |
|------------------|------------------|----------------|-------------------------|-----------|-----------|
|                  |                  |                | X                       | Y         | Z         |
| 1                | 6                | 0              | 3.556325                | -1.246933 | -0.047407 |
| 2                | 6                | 0              | 2.140288                | -1.261857 | -0.040375 |
| 3                | 6                | 0              | 1.480839                | -0.060409 | 0.257515  |
| 4                | 6                | 0              | 2.171894                | 1.111528  | 0.543121  |
| 5                | 6                | 0              | 3.566172                | 1.120270  | 0.422035  |
| 6                | 6                | 0              | 4.272987                | -0.055260 | 0.146668  |
| 7                | 6                | 0              | 1.364639                | -2.519825 | -0.204038 |
| 8                | 8                | 0              | 2.045704                | -3.646904 | -0.172517 |
| 9                | 8                | 0              | 0.107742                | -0.004312 | 0.308432  |
| 10               | 8                | 0              | 4.254119                | 2.297809  | 0.559491  |
| 11               | 8                | 0              | 4.217528                | -2.412101 | -0.252056 |
| 12               | 6                | 0              | 0.004415                | -2.379479 | -0.333152 |
| 13               | 6                | 0              | -0.563242               | -1.007414 | -0.560956 |
| 14               | 6                | 0              | -2.040289               | -0.854550 | -0.295195 |
| 15               | 6                | 0              | -2.869497               | -0.212415 | -1.223108 |
| 16               | 6                | 0              | -4.229165               | -0.011662 | -0.965214 |
| 17               | 6                | 0              | -4.774251               | -0.456526 | 0.245761  |
| 18               | 6                | 0              | -3.959546               | -1.103539 | 1.185557  |
| 19               | 6                | 0              | -2.606900               | -1.299057 | 0.907302  |
| 20               | 8                | 0              | -6.109029               | -0.232507 | 0.453288  |
| 21               | 8                | 0              | -0.297537               | 2.767331  | -0.612374 |
| 22               | 8                | 0              | 2.182354                | 4.146825  | -0.227124 |
| 23               | 8                | 0              | -3.058345               | 3.032774  | -0.074800 |
| 24               | 1                | 0              | 5.355375                | -0.049292 | 0.076293  |
| 25               | 1                | 0              | 1.635740                | 2.009647  | 0.809166  |
| 26               | 1                | 0              | 3.619603                | 3.036363  | 0.437379  |
| 27               | 1                | 0              | 3.455781                | -3.119173 | -0.248857 |
| 28               | 1                | 0              | -0.650769               | -3.240034 | -0.423609 |
| 29               | 1                | 0              | -0.358077               | -0.642234 | -1.583161 |
| 30               | 1                | 0              | -2.450642               | 0.145695  | -2.159944 |
| 31               | 1                | 0              | -4.872270               | 0.475046  | -1.691837 |
| 32               | 1                | 0              | -4.382686               | -1.450437 | 2.124650  |
| 33               | 1                | 0              | -1.976818               | -1.799531 | 1.636396  |
| 34               | 1                | 0              | -6.378177               | -0.567285 | 1.320756  |
| 35               | 1                | 0              | -0.238019               | 1.833229  | -0.337329 |
| 36               | 1                | 0              | 1.287650                | 3.761684  | -0.357581 |
| 37               | 1                | 0              | 2.045024                | 5.037532  | 0.120185  |
| 38               | 1                | 0              | -1.227983               | 3.010993  | -0.431317 |
| 39               | 1                | 0              | -3.397507               | 2.133373  | -0.217137 |
| 40               | 1                | 0              | -3.294518               | 3.255885  | 0.836148  |

### INT1-3wb

| Center<br>Number | Atomic<br>Number | Atomic<br>Type | Coordinates (Angstroms) |           |           |
|------------------|------------------|----------------|-------------------------|-----------|-----------|
|                  |                  |                | X                       | Y         | Z         |
| 1                | 6                | 0              | -1.459220               | -0.198547 | 0.412673  |
| 2                | 6                | 0              | -1.255176               | -1.639053 | 0.265051  |
| 3                | 6                | 0              | -2.353609               | -2.420684 | -0.247577 |
| 4                | 6                | 0              | -3.515656               | -1.840181 | -0.735635 |
| 5                | 6                | 0              | -3.654083               | -0.440480 | -0.671269 |
| 6                | 6                | 0              | -2.661611               | 0.357895  | -0.110375 |
| 7                | 6                | 0              | -0.035944               | -2.337293 | 0.627319  |
| 8                | 8                | 0              | -0.047629               | -3.597467 | 0.838350  |
| 9                | 8                | 0              | -2.269530               | -3.774746 | -0.297578 |

|    |   |   |           |           |           |
|----|---|---|-----------|-----------|-----------|
| 10 | 8 | 0 | -4.812221 | 0.081168  | -1.155177 |
| 11 | 8 | 0 | -0.608423 | 0.557702  | 1.024407  |
| 12 | 6 | 0 | 1.305382  | -1.725829 | 0.691293  |
| 13 | 6 | 0 | 1.731748  | -0.717849 | -0.096655 |
| 14 | 6 | 0 | 3.087160  | -0.177762 | -0.191708 |
| 15 | 6 | 0 | 4.180048  | -0.670870 | 0.551518  |
| 16 | 6 | 0 | 5.448108  | -0.112029 | 0.431796  |
| 17 | 6 | 0 | 5.658224  | 0.964702  | -0.444221 |
| 18 | 6 | 0 | 4.592076  | 1.472562  | -1.194995 |
| 19 | 6 | 0 | 3.328340  | 0.903121  | -1.065383 |
| 20 | 8 | 0 | 6.880947  | 1.555904  | -0.606479 |
| 21 | 8 | 0 | -1.018180 | 3.084033  | 1.085931  |
| 22 | 8 | 0 | -3.581789 | 3.838818  | 1.145842  |
| 23 | 8 | 0 | -5.031428 | 2.767445  | -0.882239 |
| 24 | 1 | 0 | -4.311321 | -2.458788 | -1.134594 |
| 25 | 1 | 0 | -2.813181 | 1.426372  | -0.018689 |
| 26 | 1 | 0 | -4.835318 | 1.066379  | -1.049137 |
| 27 | 1 | 0 | -1.413698 | -4.002763 | 0.176724  |
| 28 | 1 | 0 | 1.996872  | -2.278128 | 1.323348  |
| 29 | 1 | 0 | 1.000534  | -0.233407 | -0.737633 |
| 30 | 1 | 0 | 2.506064  | 1.304889  | -1.651417 |
| 31 | 1 | 0 | 4.765122  | 2.305070  | -1.869252 |
| 32 | 1 | 0 | 6.276148  | -0.508191 | 1.013566  |
| 33 | 1 | 0 | 4.044623  | -1.503966 | 1.233541  |
| 34 | 1 | 0 | 7.543509  | 1.129678  | -0.043782 |
| 35 | 1 | 0 | -0.863391 | 2.067769  | 1.067771  |
| 36 | 1 | 0 | -3.948114 | 3.620793  | 2.012942  |
| 37 | 1 | 0 | -4.499284 | 3.176825  | -0.152674 |
| 38 | 1 | 0 | -4.839725 | 3.280178  | -1.678444 |
| 39 | 1 | 0 | -2.625197 | 3.557560  | 1.169715  |
| 40 | 1 | 0 | -0.452342 | 3.440652  | 1.782557  |

### TS2-3wb

| Center<br>Number | Atomic<br>Number | Atomic<br>Type | Coordinates (Angstroms) |           |           |
|------------------|------------------|----------------|-------------------------|-----------|-----------|
|                  |                  |                | X                       | Y         | Z         |
| 1                | 6                | 0              | 3.211322                | -1.075787 | -0.819373 |
| 2                | 6                | 0              | 2.432583                | -0.699579 | 0.287542  |
| 3                | 6                | 0              | 2.983494                | 0.211363  | 1.207091  |
| 4                | 6                | 0              | 4.269819                | 0.719777  | 1.043729  |
| 5                | 6                | 0              | 5.031142                | 0.324948  | -0.063921 |
| 6                | 6                | 0              | 4.499543                | -0.575977 | -0.997997 |
| 7                | 6                | 0              | 1.047197                | -1.177707 | 0.468133  |
| 8                | 6                | 0              | 0.630839                | -2.470208 | 0.036559  |
| 9                | 6                | 0              | -0.742560               | -2.748820 | 0.006123  |
| 10               | 8                | 0              | -1.236342               | -3.935169 | -0.167963 |
| 11               | 8                | 0              | 6.285735                | 0.856237  | -0.182570 |
| 12               | 6                | 0              | -1.678012               | -1.596405 | 0.072700  |
| 13               | 6                | 0              | -3.072377               | -1.823393 | 0.234246  |
| 14               | 6                | 0              | -4.006272               | -0.785753 | 0.175379  |
| 15               | 6                | 0              | -3.560422               | 0.509045  | -0.116251 |
| 16               | 6                | 0              | -2.202410               | 0.767029  | -0.353245 |
| 17               | 6                | 0              | -1.257738               | -0.265845 | -0.250391 |
| 18               | 8                | 0              | -3.521911               | -3.088596 | 0.436229  |
| 19               | 8                | 0              | 0.031158                | 0.028818  | -0.484217 |
| 20               | 8                | 0              | -4.490636               | 1.501981  | -0.158418 |
| 21               | 8                | 0              | -0.945573               | 4.232195  | 0.647040  |
| 22               | 8                | 0              | -3.397290               | 3.960301  | -0.514853 |
| 23               | 1                | 0              | -5.061465               | -0.989049 | 0.320847  |
| 24               | 1                | 0              | -1.867011               | 1.770390  | -0.584462 |
| 25               | 1                | 0              | -4.064575               | 2.379854  | -0.327661 |
| 26               | 1                | 0              | -2.713119               | -3.672175 | 0.223436  |
| 27               | 1                | 0              | 1.340064                | -3.193502 | -0.351928 |
| 28               | 1                | 0              | 0.593883                | -0.802549 | 1.387307  |
| 29               | 1                | 0              | 2.394292                | 0.524727  | 2.065129  |
| 30               | 1                | 0              | 4.692909                | 1.418295  | 1.758294  |
| 31               | 1                | 0              | 5.088576                | -0.874623 | -1.861037 |
| 32               | 1                | 0              | 2.800383                | -1.757046 | -1.557620 |
| 33               | 1                | 0              | 6.722815                | 0.522722  | -0.979476 |
| 34               | 1                | 0              | 0.594164                | 1.588725  | -0.371134 |
| 35               | 1                | 0              | -0.997573               | 4.127457  | 1.606278  |
| 36               | 1                | 0              | -2.498206               | 4.075274  | -0.116342 |
| 37               | 1                | 0              | -3.336307               | 4.283586  | -1.423345 |

|    |   |   |           |          |           |
|----|---|---|-----------|----------|-----------|
| 38 | 8 | 0 | 0.931532  | 2.525717 | -0.307696 |
| 39 | 1 | 0 | -0.240994 | 3.605114 | 0.340891  |
| 40 | 1 | 0 | 1.781904  | 2.464788 | 0.148468  |

### INT2-3wb

| Center<br>Number | Atomic<br>Number | Atomic<br>Type | Coordinates (Angstroms) |           |           |
|------------------|------------------|----------------|-------------------------|-----------|-----------|
|                  |                  |                | X                       | Y         | Z         |
| 1                | 6                | 0              | -1.276753               | -0.278564 | -0.033246 |
| 2                | 6                | 0              | -1.763833               | -1.589723 | 0.079091  |
| 3                | 6                | 0              | -3.167837               | -1.771119 | 0.046668  |
| 4                | 6                | 0              | -4.035933               | -0.675452 | -0.045356 |
| 5                | 6                | 0              | -3.506099               | 0.617330  | -0.140885 |
| 6                | 6                | 0              | -2.116098               | 0.828531  | -0.144097 |
| 7                | 6                | 0              | -0.828906               | -2.746151 | 0.091171  |
| 8                | 8                | 0              | -1.357638               | -3.941122 | -0.085830 |
| 9                | 8                | 0              | -3.664469               | -3.030429 | 0.081678  |
| 10               | 8                | 0              | -4.383770               | 1.656523  | -0.222390 |
| 11               | 8                | 0              | 0.081001                | -0.062641 | -0.099363 |
| 12               | 6                | 0              | 0.502392                | -2.457119 | 0.253401  |
| 13               | 6                | 0              | 0.903831                | -1.063364 | 0.636441  |
| 14               | 6                | 0              | 2.338418                | -0.686536 | 0.358055  |
| 15               | 6                | 0              | 2.965929                | -1.050288 | -0.840628 |
| 16               | 6                | 0              | 4.265380                | -0.633187 | -1.130409 |
| 17               | 6                | 0              | 4.958300                | 0.165549  | -0.210689 |
| 18               | 6                | 0              | 4.349095                | 0.538807  | 0.992874  |
| 19               | 6                | 0              | 3.048888                | 0.111600  | 1.265857  |
| 20               | 8                | 0              | 6.235598                | 0.610265  | -0.432439 |
| 21               | 8                | 0              | 1.144493                | 2.472252  | -0.357562 |
| 22               | 8                | 0              | -0.656961               | 4.287105  | 0.596334  |
| 23               | 8                | 0              | -3.174704               | 4.078005  | -0.435108 |
| 24               | 1                | 0              | -5.109531               | -0.829479 | -0.062592 |
| 25               | 1                | 0              | -1.701412               | 1.826203  | -0.213611 |
| 26               | 1                | 0              | -3.906421               | 2.519411  | -0.308295 |
| 27               | 1                | 0              | -2.807377               | -3.622592 | 0.013317  |
| 28               | 1                | 0              | 1.256437                | -3.237647 | 0.247212  |
| 29               | 1                | 0              | 0.687378                | -0.843488 | 1.696906  |
| 30               | 1                | 0              | 2.577989                | 0.409103  | 2.199477  |
| 31               | 1                | 0              | 4.897576                | 1.154258  | 1.698729  |
| 32               | 1                | 0              | 4.739297                | -0.923121 | -2.064608 |
| 33               | 1                | 0              | 2.428135                | -1.664937 | -1.556059 |
| 34               | 1                | 0              | 6.559898                | 0.295187  | -1.288274 |
| 35               | 1                | 0              | 0.785094                | 1.560338  | -0.274522 |
| 36               | 1                | 0              | -0.651393               | 4.243985  | 1.561720  |
| 37               | 1                | 0              | -2.254547               | 4.166936  | -0.083401 |
| 38               | 1                | 0              | -3.161589               | 4.449607  | -1.326947 |
| 39               | 1                | 0              | 0.025528                | 3.640830  | 0.289468  |
| 40               | 1                | 0              | 2.025901                | 2.433873  | 0.039432  |

### INT1-3wc

| Center<br>Number | Atomic<br>Number | Atomic<br>Type | Coordinates (Angstroms) |           |           |
|------------------|------------------|----------------|-------------------------|-----------|-----------|
|                  |                  |                | X                       | Y         | Z         |
| 1                | 6                | 0              | 2.225224                | -0.233162 | 1.353944  |
| 2                | 6                | 0              | 1.633390                | -1.168096 | 0.481379  |
| 3                | 6                | 0              | 2.490912                | -1.958482 | -0.313157 |
| 4                | 6                | 0              | 3.870810                | -1.777584 | -0.281196 |
| 5                | 6                | 0              | 4.431524                | -0.792433 | 0.547192  |
| 6                | 6                | 0              | 3.603059                | -0.047229 | 1.397541  |
| 7                | 6                | 0              | 0.177987                | -1.187087 | 0.369981  |
| 8                | 6                | 0              | -0.586344               | -1.956247 | -0.429917 |
| 9                | 6                | 0              | -2.058024               | -1.864011 | -0.464301 |
| 10               | 8                | 0              | -2.682122               | -2.967999 | -0.585350 |
| 11               | 8                | 0              | 5.777907                | -0.561737 | 0.480401  |
| 12               | 6                | 0              | -2.775112               | -0.613312 | -0.284838 |
| 13               | 6                | 0              | -2.208301               | 0.703734  | -0.579940 |
| 14               | 6                | 0              | -2.957497               | 1.845851  | -0.167063 |
| 15               | 6                | 0              | -4.221494               | 1.715445  | 0.392272  |
| 16               | 6                | 0              | -4.832698               | 0.463187  | 0.572604  |
| 17               | 6                | 0              | -4.124296               | -0.675163 | 0.209264  |

|    |   |   |           |           |           |
|----|---|---|-----------|-----------|-----------|
| 18 | 8 | 0 | -1.100267 | 0.851503  | -1.220582 |
| 19 | 8 | 0 | -4.743685 | -1.871803 | 0.370604  |
| 20 | 8 | 0 | -4.963391 | 2.804943  | 0.770523  |
| 21 | 8 | 0 | 0.803999  | 2.485537  | -0.531525 |
| 22 | 8 | 0 | 5.460659  | 2.131772  | 0.089119  |
| 23 | 8 | 0 | 3.220201  | 1.639857  | -1.464485 |
| 24 | 1 | 0 | -5.838769 | 0.384765  | 0.967346  |
| 25 | 1 | 0 | -2.533223 | 2.827525  | -0.359643 |
| 26 | 1 | 0 | -4.468597 | 3.618674  | 0.596108  |
| 27 | 1 | 0 | -4.115844 | -2.551990 | -0.012524 |
| 28 | 1 | 0 | -0.167459 | -2.765006 | -1.023860 |
| 29 | 1 | 0 | -0.329616 | -0.439686 | 0.975131  |
| 30 | 1 | 0 | 1.587919  | 0.379746  | 1.985764  |
| 31 | 1 | 0 | 4.039884  | 0.705499  | 2.045354  |
| 32 | 1 | 0 | 4.523535  | -2.356278 | -0.927013 |
| 33 | 1 | 0 | 2.076379  | -2.694967 | -0.994168 |
| 34 | 1 | 0 | 5.904142  | 0.417251  | 0.493131  |
| 35 | 1 | 0 | 0.030795  | 1.882653  | -0.785447 |
| 36 | 1 | 0 | 3.172748  | 0.672996  | -1.452375 |
| 37 | 1 | 0 | 0.814418  | 2.502719  | 0.434175  |
| 38 | 1 | 0 | 2.342502  | 1.941836  | -1.112417 |
| 39 | 1 | 0 | 4.650582  | 2.042185  | -0.471875 |
| 40 | 1 | 0 | 6.109352  | 2.603037  | -0.449930 |

### TS2-3wc

| Center<br>Number | Atomic<br>Number | Atomic<br>Type | Coordinates (Angstroms) |           |           |
|------------------|------------------|----------------|-------------------------|-----------|-----------|
|                  |                  |                | X                       | Y         | Z         |
| 1                | 6                | 0              | -1.933235               | 0.512556  | -0.149609 |
| 2                | 6                | 0              | -2.788673               | -0.618351 | 0.050485  |
| 3                | 6                | 0              | -4.186896               | -0.382334 | 0.152203  |
| 4                | 6                | 0              | -4.724534               | 0.908063  | 0.141870  |
| 5                | 6                | 0              | -3.859038               | 1.987771  | -0.043211 |
| 6                | 6                | 0              | -2.482354               | 1.806670  | -0.208023 |
| 7                | 6                | 0              | -2.287727               | -2.011346 | -0.094941 |
| 8                | 8                | 0              | -3.143499               | -2.945569 | -0.376857 |
| 9                | 8                | 0              | -5.036760               | -1.434876 | 0.239322  |
| 10               | 8                | 0              | -4.424410               | 3.238566  | -0.052850 |
| 11               | 8                | 0              | -0.608519               | 0.378854  | -0.308833 |
| 12               | 6                | 0              | -0.906293               | -2.213729 | -0.023317 |
| 13               | 6                | 0              | -0.091939               | -1.176014 | 0.521483  |
| 14               | 6                | 0              | 1.377354                | -1.183654 | 0.379429  |
| 15               | 6                | 0              | 2.019483                | -1.764419 | -0.728375 |
| 16               | 6                | 0              | 3.400526                | -1.673426 | -0.888193 |
| 17               | 6                | 0              | 4.170463                | -0.981235 | 0.059005  |
| 18               | 6                | 0              | 3.549472                | -0.421231 | 1.186166  |
| 19               | 6                | 0              | 2.168822                | -0.517372 | 1.330341  |
| 20               | 8                | 0              | 5.512952                | -0.857164 | -0.157134 |
| 21               | 8                | 0              | 1.068268                | 2.451781  | 0.081058  |
| 22               | 8                | 0              | 3.465738                | 2.031496  | -1.172707 |
| 23               | 1                | 0              | -5.794203               | 1.059352  | 0.231267  |
| 24               | 1                | 0              | -1.821215               | 2.656585  | -0.347766 |
| 25               | 1                | 0              | -3.744545               | 3.908348  | -0.213409 |
| 26               | 1                | 0              | -4.451955               | -2.239613 | -0.001438 |
| 27               | 1                | 0              | -0.468602               | -3.109093 | -0.451540 |
| 28               | 1                | 0              | -0.417253               | -0.750978 | 1.472747  |
| 29               | 1                | 0              | 1.691463                | -0.055961 | 2.190916  |
| 30               | 1                | 0              | 4.147382                | 0.113353  | 1.916745  |
| 31               | 1                | 0              | 3.892337                | -2.099954 | -1.756787 |
| 32               | 1                | 0              | 1.429589                | -2.265405 | -1.489345 |
| 33               | 1                | 0              | 5.798909                | 0.026296  | 0.180035  |
| 34               | 1                | 0              | 0.445309                | 1.687630  | -0.050489 |
| 35               | 1                | 0              | 3.397135                | 1.137142  | -1.536457 |
| 36               | 1                | 0              | 1.178890                | 2.533083  | 1.037592  |
| 37               | 1                | 0              | 2.609229                | 2.175987  | -0.697327 |
| 38               | 8                | 0              | 5.695243                | 1.797636  | 0.431957  |
| 39               | 1                | 0              | 4.900373                | 1.995709  | -0.122987 |
| 40               | 1                | 0              | 6.422457                | 2.310025  | 0.054723  |

### INT2-3wc

| Center<br>Number | Atomic<br>Number | Atomic<br>Type | Coordinates (Angstroms) |           |           |
|------------------|------------------|----------------|-------------------------|-----------|-----------|
|                  |                  |                | X                       | Y         | Z         |
| 1                | 6                | 0              | 2.244618                | -0.560030 | 1.383104  |
| 2                | 6                | 0              | 1.346251                | -1.084634 | 0.444771  |
| 3                | 6                | 0              | 1.859530                | -1.601443 | -0.752878 |
| 4                | 6                | 0              | 3.229388                | -1.574095 | -1.019971 |
| 5                | 6                | 0              | 4.111917                | -1.018216 | -0.083280 |
| 6                | 6                | 0              | 3.616168                | -0.529298 | 1.133739  |
| 7                | 6                | 0              | -0.140012               | -1.002748 | 0.692856  |
| 8                | 6                | 0              | -0.947380               | -2.168518 | 0.205107  |
| 9                | 6                | 0              | -2.291612               | -2.014520 | -0.008341 |
| 10               | 8                | 0              | -3.157809               | -2.970729 | -0.283801 |
| 11               | 8                | 0              | 5.445057                | -0.958141 | -0.392080 |
| 12               | 6                | 0              | -2.819120               | -0.624816 | 0.038177  |
| 13               | 6                | 0              | -1.943598               | 0.471849  | 0.039577  |
| 14               | 6                | 0              | -2.399806               | 1.790557  | -0.020543 |
| 15               | 6                | 0              | -3.783326               | 2.009578  | -0.080875 |
| 16               | 6                | 0              | -4.693258               | 0.950513  | -0.093567 |
| 17               | 6                | 0              | -4.208203               | -0.363647 | -0.052525 |
| 18               | 8                | 0              | -0.583979               | 0.263157  | 0.035255  |
| 19               | 8                | 0              | -5.066292               | -1.405172 | -0.125396 |
| 20               | 8                | 0              | -4.308318               | 3.278566  | -0.124468 |
| 21               | 8                | 0              | 1.119968                | 2.468836  | 0.290803  |
| 22               | 8                | 0              | 5.773670                | 1.676458  | 0.260996  |
| 23               | 8                | 0              | 3.428577                | 2.029417  | -1.159269 |
| 24               | 1                | 0              | -5.758937               | 1.140124  | -0.158925 |
| 25               | 1                | 0              | -1.694569               | 2.615406  | -0.008388 |
| 26               | 1                | 0              | -3.596189               | 3.933436  | -0.138054 |
| 27               | 1                | 0              | -4.424565               | -2.231644 | -0.209217 |
| 28               | 1                | 0              | -0.478015               | -3.145965 | 0.161639  |
| 29               | 1                | 0              | -0.303595               | -0.801342 | 1.766151  |
| 30               | 1                | 0              | 1.865733                | -0.156189 | 2.318869  |
| 31               | 1                | 0              | 4.302083                | -0.103873 | 1.859073  |
| 32               | 1                | 0              | 3.624655                | -1.954483 | -1.956906 |
| 33               | 1                | 0              | 1.175994                | -2.011615 | -1.490072 |
| 34               | 1                | 0              | 5.795641                | -0.099611 | -0.054803 |
| 35               | 1                | 0              | 0.540867                | 1.678470  | 0.217705  |
| 36               | 1                | 0              | 3.300251                | 1.136994  | -1.512972 |
| 37               | 1                | 0              | 1.302303                | 2.565916  | 1.235256  |
| 38               | 1                | 0              | 2.621325                | 2.197985  | -0.616573 |
| 39               | 1                | 0              | 4.945253                | 1.917357  | -0.221742 |
| 40               | 1                | 0              | 6.485434                | 2.176704  | -0.159462 |

#### INT1-4w

| Center<br>Number | Atomic<br>Number | Atomic<br>Type | Coordinates (Angstroms) |           |           |
|------------------|------------------|----------------|-------------------------|-----------|-----------|
|                  |                  |                | X                       | Y         | Z         |
| 1                | 6                | 0              | 2.677725                | -2.299979 | -0.244863 |
| 2                | 6                | 0              | 1.778881                | -1.431964 | 0.407704  |
| 3                | 6                | 0              | 2.316901                | -0.344182 | 1.124670  |
| 4                | 6                | 0              | 3.685599                | -0.105982 | 1.168208  |
| 5                | 6                | 0              | 4.548939                | -0.957874 | 0.476452  |
| 6                | 6                | 0              | 4.050466                | -2.068869 | -0.216501 |
| 7                | 6                | 0              | 0.326334                | -1.534335 | 0.308603  |
| 8                | 6                | 0              | -0.415522               | -2.454340 | -0.338674 |
| 9                | 6                | 0              | -1.890645               | -2.391116 | -0.357228 |
| 10               | 8                | 0              | -2.507173               | -3.502239 | -0.269428 |
| 11               | 8                | 0              | 5.883458                | -0.617001 | 0.475027  |
| 12               | 6                | 0              | -2.605519               | -1.128446 | -0.368838 |
| 13               | 6                | 0              | -3.905510               | -1.085790 | 0.250802  |
| 14               | 6                | 0              | -4.555710               | 0.109538  | 0.537748  |
| 15               | 6                | 0              | -3.950122               | 1.308412  | 0.114569  |
| 16               | 6                | 0              | -2.804569               | 1.303477  | -0.662940 |
| 17               | 6                | 0              | -2.059678               | 0.117973  | -0.912273 |
| 18               | 8                | 0              | -4.510503               | -2.237408 | 0.647869  |
| 19               | 8                | 0              | -0.965414               | 0.194485  | -1.588830 |
| 20               | 8                | 0              | -4.529528               | 2.494251  | 0.481365  |
| 21               | 8                | 0              | 0.060458                | 2.533679  | -0.537515 |
| 22               | 8                | 0              | 2.857702                | 2.975272  | -0.109022 |
| 23               | 8                | 0              | 5.467528                | 2.037325  | -0.657805 |
| 24               | 8                | 0              | -2.053697               | 3.994746  | 0.658784  |
| 25               | 1                | 0              | -5.486882               | 0.111855  | 1.092587  |

|    |   |   |           |           |           |
|----|---|---|-----------|-----------|-----------|
| 26 | 1 | 0 | -2.419099 | 2.232271  | -1.060300 |
| 27 | 1 | 0 | -3.837929 | 3.187243  | 0.422099  |
| 28 | 1 | 0 | -3.919338 | -2.977146 | 0.328801  |
| 29 | 1 | 0 | 0.020983  | -3.339193 | -0.795886 |
| 30 | 1 | 0 | -0.208856 | -0.716397 | 0.784346  |
| 31 | 1 | 0 | 1.645428  | 0.342528  | 1.631804  |
| 32 | 1 | 0 | 4.088391  | 0.747979  | 1.701980  |
| 33 | 1 | 0 | 4.729804  | -2.730324 | -0.747111 |
| 34 | 1 | 0 | 2.303730  | -3.150528 | -0.805790 |
| 35 | 1 | 0 | 6.406439  | -1.265947 | -0.018673 |
| 36 | 1 | 0 | -0.198388 | 1.673588  | -0.960538 |
| 37 | 1 | 0 | -1.282387 | 3.514165  | 0.278105  |
| 38 | 1 | 0 | -1.872686 | 4.935023  | 0.534273  |
| 39 | 1 | 0 | 1.028775  | 2.540565  | -0.417297 |
| 40 | 1 | 0 | 3.718278  | 2.547639  | -0.306902 |
| 41 | 1 | 0 | 3.000995  | 3.916897  | -0.271782 |
| 42 | 1 | 0 | 5.702412  | 2.051305  | -1.595294 |
| 43 | 1 | 0 | 5.772251  | 1.174459  | -0.322620 |

### TS2-4w

| Center Number | Atomic Number | Atomic Type | Coordinates (Angstroms) |           |           |
|---------------|---------------|-------------|-------------------------|-----------|-----------|
|               |               |             | X                       | Y         | Z         |
| 1             | 6             | 0           | -4.006760               | -0.776747 | 0.154216  |
| 2             | 6             | 0           | -2.619238               | -1.051135 | 0.001611  |
| 3             | 6             | 0           | -1.773620               | 0.023669  | -0.431372 |
| 4             | 6             | 0           | -2.334280               | 1.284035  | -0.684510 |
| 5             | 6             | 0           | -3.669664               | 1.542307  | -0.373213 |
| 6             | 6             | 0           | -4.532206               | 0.513778  | 0.023451  |
| 7             | 6             | 0           | -2.123161               | -2.449075 | 0.066016  |
| 8             | 8             | 0           | -2.979987               | -3.414593 | -0.038848 |
| 9             | 8             | 0           | -0.453720               | -0.109513 | -0.599762 |
| 10            | 8             | 0           | -4.149870               | 2.823913  | -0.438291 |
| 11            | 8             | 0           | -4.855664               | -1.795773 | 0.451811  |
| 12            | 6             | 0           | -0.732073               | -2.634267 | 0.134200  |
| 13            | 6             | 0           | 0.068734                | -1.517820 | 0.497613  |
| 14            | 6             | 0           | 1.538100                | -1.493618 | 0.362183  |
| 15            | 6             | 0           | 2.283236                | -0.624501 | 1.177638  |
| 16            | 6             | 0           | 3.656217                | -0.474805 | 1.011931  |
| 17            | 6             | 0           | 4.303210                | -1.192357 | 0.002689  |
| 18            | 6             | 0           | 3.591426                | -2.081046 | -0.811118 |
| 19            | 6             | 0           | 2.216369                | -2.222592 | -0.628438 |
| 20            | 8             | 0           | 5.647775                | -0.941730 | -0.169099 |
| 21            | 8             | 0           | 0.434216                | 2.422562  | 0.327427  |
| 22            | 8             | 0           | -1.733854               | 4.228454  | 0.200087  |
| 23            | 8             | 0           | 3.188914                | 2.939742  | 0.603003  |
| 24            | 1             | 0           | -5.581063               | 0.704190  | 0.221888  |
| 25            | 1             | 0           | -1.693995               | 2.081292  | -1.033022 |
| 26            | 1             | 0           | -3.382905               | 3.434880  | -0.382559 |
| 27            | 1             | 0           | -4.297919               | -2.632170 | 0.302606  |
| 28            | 1             | 0           | -0.293356               | -3.573739 | -0.185785 |
| 29            | 1             | 0           | -0.277580               | -0.934841 | 1.351905  |
| 30            | 1             | 0           | 1.774829                | -0.039936 | 1.938929  |
| 31            | 1             | 0           | 4.224895                | 0.209083  | 1.632713  |
| 32            | 1             | 0           | 4.102366                | -2.634488 | -1.594089 |
| 33            | 1             | 0           | 1.661784                | -2.885382 | -1.284868 |
| 34            | 1             | 0           | 6.014408                | -1.490760 | -0.878112 |
| 35            | 1             | 0           | 0.265452                | 1.512232  | -0.000714 |
| 36            | 1             | 0           | -0.936070               | 3.652246  | 0.245503  |
| 37            | 1             | 0           | -1.436299               | 5.072912  | -0.161774 |
| 38            | 1             | 0           | 1.404574                | 2.545005  | 0.374533  |
| 39            | 1             | 0           | 3.952438                | 2.517217  | 0.150940  |
| 40            | 1             | 0           | 3.373428                | 3.888043  | 0.588298  |
| 41            | 8             | 0           | 5.488952                | 1.903995  | -0.614337 |
| 42            | 1             | 0           | 5.554941                | 2.091270  | -1.560328 |
| 43            | 1             | 0           | 5.678236                | 0.951537  | -0.519373 |

### INT2-4w

| Center Number | Atomic Number | Atomic Type | Coordinates (Angstroms) |   |   |
|---------------|---------------|-------------|-------------------------|---|---|
|               |               |             | X                       | Y | Z |

|    |   |   |           |           |           |
|----|---|---|-----------|-----------|-----------|
| 1  | 6 | 0 | 2.050359  | -1.995202 | -0.746861 |
| 2  | 6 | 0 | 1.486660  | -1.429256 | 0.403748  |
| 3  | 6 | 0 | 2.334336  | -0.799402 | 1.324448  |
| 4  | 6 | 0 | 3.706949  | -0.709265 | 1.099324  |
| 5  | 6 | 0 | 4.241672  | -1.248329 | -0.072500 |
| 6  | 6 | 0 | 3.422291  | -1.910421 | -0.992434 |
| 7  | 6 | 0 | -0.006929 | -1.358639 | 0.597524  |
| 8  | 6 | 0 | -0.807998 | -2.575372 | 0.236003  |
| 9  | 6 | 0 | -2.164348 | -2.436992 | 0.062815  |
| 10 | 8 | 0 | -3.049202 | -3.402757 | -0.077437 |
| 11 | 8 | 0 | 5.594233  | -1.060440 | -0.280675 |
| 12 | 6 | 0 | -2.676814 | -1.042337 | -0.013062 |
| 13 | 6 | 0 | -4.062231 | -0.749908 | -0.039729 |
| 14 | 6 | 0 | -4.526783 | 0.570274  | -0.157431 |
| 15 | 6 | 0 | -3.595204 | 1.601505  | -0.322347 |
| 16 | 6 | 0 | -2.225734 | 1.328633  | -0.403499 |
| 17 | 6 | 0 | -1.787237 | 0.026489  | -0.197047 |
| 18 | 8 | 0 | -4.944229 | -1.774992 | 0.053848  |
| 19 | 8 | 0 | -0.431133 | -0.186165 | -0.215106 |
| 20 | 8 | 0 | -4.035257 | 2.898159  | -0.390147 |
| 21 | 8 | 0 | 0.627215  | 2.459955  | 0.657574  |
| 22 | 8 | 0 | 3.078568  | 2.840552  | -0.625191 |
| 23 | 8 | 0 | 5.599926  | 1.801917  | -0.062664 |
| 24 | 8 | 0 | -1.599366 | 4.265101  | 0.455692  |
| 25 | 1 | 0 | -5.589906 | 0.781944  | -0.117917 |
| 26 | 1 | 0 | -1.513216 | 2.118050  | -0.582360 |
| 27 | 1 | 0 | -3.267608 | 3.488712  | -0.237428 |
| 28 | 1 | 0 | -4.334458 | -2.614987 | 0.010004  |
| 29 | 1 | 0 | -0.335308 | -3.551725 | 0.273522  |
| 30 | 1 | 0 | -0.202617 | -1.035003 | 1.635592  |
| 31 | 1 | 0 | 1.913700  | -0.351632 | 2.220816  |
| 32 | 1 | 0 | 4.360296  | -0.205272 | 1.803876  |
| 33 | 1 | 0 | 3.847583  | -2.335988 | -1.897459 |
| 34 | 1 | 0 | 1.405538  | -2.487508 | -1.468486 |
| 35 | 1 | 0 | 5.873677  | -1.467782 | -1.113819 |
| 36 | 1 | 0 | 0.384161  | 1.546217  | 0.419647  |
| 37 | 1 | 0 | -0.783948 | 3.719832  | 0.525825  |
| 38 | 1 | 0 | -1.311127 | 5.150929  | 0.200770  |
| 39 | 1 | 0 | 1.510324  | 2.602801  | 0.252439  |
| 40 | 1 | 0 | 3.944690  | 2.426028  | -0.411166 |
| 41 | 1 | 0 | 2.971497  | 2.741001  | -1.580255 |
| 42 | 1 | 0 | 6.307227  | 2.263937  | -0.532003 |
| 43 | 1 | 0 | 5.759531  | 0.849137  | -0.202455 |

### INT1-4wb

| Center Number | Atomic Number | Atomic Type | Coordinates (Angstroms) |           |           |
|---------------|---------------|-------------|-------------------------|-----------|-----------|
|               |               |             | X                       | Y         | Z         |
| 1             | 6             | 0           | -3.673555               | 1.280534  | -0.497924 |
| 2             | 6             | 0           | -2.619453               | 0.509423  | 0.037018  |
| 3             | 6             | 0           | -2.942790               | -0.747509 | 0.591712  |
| 4             | 6             | 0           | -4.252768               | -1.217821 | 0.620864  |
| 5             | 6             | 0           | -5.279185               | -0.431853 | 0.084804  |
| 6             | 6             | 0           | -4.986175               | 0.821638  | -0.476624 |
| 7             | 6             | 0           | -1.223391               | 0.937877  | 0.029165  |
| 8             | 6             | 0           | -0.736998               | 2.151823  | -0.313678 |
| 9             | 6             | 0           | 0.679658                | 2.525453  | -0.178558 |
| 10            | 8             | 0           | 0.910451                | 3.727347  | 0.178451  |
| 11            | 8             | 0           | -6.550530               | -0.935620 | 0.131144  |
| 12            | 6             | 0           | 1.770480                | 1.571571  | -0.315481 |
| 13            | 6             | 0           | 2.950823                | 1.774446  | 0.473432  |
| 14            | 6             | 0           | 3.936062                | 0.801367  | 0.602000  |
| 15            | 6             | 0           | 3.791485                | -0.395739 | -0.117248 |
| 16            | 6             | 0           | 2.736545                | -0.580025 | -1.011641 |
| 17            | 6             | 0           | 1.716189                | 0.396819  | -1.170493 |
| 18            | 8             | 0           | 3.118079                | 2.921618  | 1.186841  |
| 19            | 8             | 0           | 0.796976                | 0.225835  | -2.073379 |
| 20            | 8             | 0           | 4.733786                | -1.363299 | 0.076093  |
| 21            | 8             | 0           | 1.027072                | -2.504465 | 0.605323  |
| 22            | 8             | 0           | -0.258505               | -1.619519 | 2.936985  |
| 23            | 8             | 0           | 3.443563                | -3.779850 | -0.289975 |
| 24            | 1             | 0           | 4.781416                | 0.957712  | 1.262281  |
| 25            | 1             | 0           | 2.700047                | -1.464543 | -1.638398 |



|    |   |   |           |           |           |
|----|---|---|-----------|-----------|-----------|
| 26 | 1 | 0 | 4.366822  | -2.240691 | -0.194137 |
| 27 | 1 | 0 | 2.364928  | 3.519497  | 0.927752  |
| 28 | 1 | 0 | -1.397696 | 2.977587  | -0.565268 |
| 29 | 1 | 0 | -0.511563 | 0.178207  | 0.343957  |
| 30 | 1 | 0 | -2.153906 | -1.361498 | 1.015379  |
| 31 | 1 | 0 | -4.489087 | -2.185491 | 1.051356  |
| 32 | 1 | 0 | -5.784090 | 1.425864  | -0.898756 |
| 33 | 1 | 0 | -3.468314 | 2.247487  | -0.945145 |
| 34 | 1 | 0 | -7.176323 | -0.315338 | -0.272531 |
| 35 | 1 | 0 | -0.038154 | -1.174737 | -1.838723 |
| 36 | 1 | 0 | 1.582898  | -1.715708 | 0.451192  |
| 37 | 1 | 0 | 2.545684  | -3.500164 | -0.008318 |
| 38 | 1 | 0 | 3.347803  | -4.060583 | -1.211553 |
| 39 | 1 | 0 | 0.157439  | -1.937938 | 2.104843  |
| 40 | 1 | 0 | -0.541727 | -0.714744 | 2.745076  |
| 41 | 8 | 0 | -0.529534 | -2.025001 | -1.624570 |
| 42 | 1 | 0 | 0.390812  | -2.457907 | -0.152037 |
| 43 | 1 | 0 | -1.409402 | -1.741407 | -1.336363 |

### TS2-4wb

| Center Number | Atomic Number | Atomic Type | Coordinates (Angstroms) |           |           |
|---------------|---------------|-------------|-------------------------|-----------|-----------|
|               |               |             | X                       | Y         | Z         |
| 1             | 6             | 0           | -3.217700               | 1.295353  | -0.848448 |
| 2             | 6             | 0           | -2.400227               | 0.653224  | 0.098322  |
| 3             | 6             | 0           | -2.937357               | -0.429639 | 0.818761  |
| 4             | 6             | 0           | -4.250459               | -0.848591 | 0.622427  |
| 5             | 6             | 0           | -5.049870               | -0.188489 | -0.319820 |
| 6             | 6             | 0           | -4.531040               | 0.882904  | -1.061793 |
| 7             | 6             | 0           | -1.002430               | 1.058693  | 0.328524  |
| 8             | 6             | 0           | -0.586619               | 2.425049  | 0.236164  |
| 9             | 6             | 0           | 0.780521                | 2.703194  | 0.228540  |
| 10            | 8             | 0           | 1.280101                | 3.903068  | 0.335088  |
| 11            | 8             | 0           | -6.333293               | -0.636814 | -0.478566 |
| 12            | 6             | 0           | 1.711243                | 1.571360  | -0.008285 |
| 13            | 6             | 0           | 3.101383                | 1.725764  | 0.225063  |
| 14            | 6             | 0           | 4.020882                | 0.710913  | -0.052906 |
| 15            | 6             | 0           | 3.558468                | -0.465761 | -0.649537 |
| 16            | 6             | 0           | 2.207612                | -0.620772 | -0.995316 |
| 17            | 6             | 0           | 1.274904                | 0.372210  | -0.654940 |
| 18            | 8             | 0           | 3.567423                | 2.895780  | 0.742753  |
| 19            | 8             | 0           | -0.019516               | 0.169166  | -0.962977 |
| 20            | 8             | 0           | 4.464881                | -1.460696 | -0.884800 |
| 21            | 8             | 0           | 1.167008                | -2.816441 | 0.983925  |
| 22            | 8             | 0           | -0.326442               | -2.069311 | 3.279536  |
| 23            | 8             | 0           | 3.141448                | -3.870850 | -0.812463 |
| 24            | 1             | 0           | 5.071437                | 0.840563  | 0.182487  |
| 25            | 1             | 0           | 1.870882                | -1.517293 | -1.501960 |
| 26            | 1             | 0           | 3.997784                | -2.325913 | -0.994127 |
| 27            | 1             | 0           | 2.777923                | 3.529288  | 0.677446  |
| 28            | 1             | 0           | -1.308235               | 3.223430  | 0.096312  |
| 29            | 1             | 0           | -0.515156               | 0.453590  | 1.094179  |
| 30            | 1             | 0           | -2.318323               | -0.946495 | 1.546360  |
| 31            | 1             | 0           | -4.663838               | -1.678023 | 1.186899  |
| 32            | 1             | 0           | -5.152273               | 1.381301  | -1.800515 |
| 33            | 1             | 0           | -2.820077               | 2.119266  | -1.432376 |
| 34            | 1             | 0           | -6.798833               | -0.100934 | -1.138468 |
| 35            | 1             | 0           | -0.565578               | -1.434339 | -0.951820 |
| 36            | 1             | 0           | 1.636893                | -1.972656 | 0.862957  |
| 37            | 1             | 0           | 2.430049                | -3.648467 | -0.172933 |
| 38            | 1             | 0           | 2.684099                | -4.098652 | -1.634971 |
| 39            | 1             | 0           | 0.204465                | -2.354182 | 2.504841  |
| 40            | 1             | 0           | -0.430264               | -1.113461 | 3.172215  |
| 41            | 8             | 0           | -0.804102               | -2.397752 | -0.870569 |
| 42            | 1             | 0           | 0.417424                | -2.755145 | 0.337117  |
| 43            | 1             | 0           | -1.694296               | -2.403551 | -0.489600 |

### INT2-4wb

| Center Number | Atomic Number | Atomic Type | Coordinates (Angstroms) |   |   |
|---------------|---------------|-------------|-------------------------|---|---|
|               |               |             | X                       | Y | Z |

|    |   |   |           |           |           |
|----|---|---|-----------|-----------|-----------|
| 1  | 6 | 0 | 3.046635  | -1.226428 | -0.911097 |
| 2  | 6 | 0 | 2.378548  | -0.559872 | 0.125501  |
| 3  | 6 | 0 | 3.068773  | 0.432090  | 0.835341  |
| 4  | 6 | 0 | 4.391229  | 0.754598  | 0.526879  |
| 5  | 6 | 0 | 5.039870  | 0.080720  | -0.513941 |
| 6  | 6 | 0 | 4.366836  | -0.913738 | -1.236906 |
| 7  | 6 | 0 | 0.936816  | -0.859281 | 0.446004  |
| 8  | 6 | 0 | 0.576775  | -2.315038 | 0.536973  |
| 9  | 6 | 0 | -0.739272 | -2.679991 | 0.444638  |
| 10 | 8 | 0 | -1.231874 | -3.893557 | 0.649205  |
| 11 | 8 | 0 | 6.338696  | 0.436912  | -0.782773 |
| 12 | 6 | 0 | -1.698177 | -1.618234 | 0.046476  |
| 13 | 6 | 0 | -3.096534 | -1.818406 | 0.087807  |
| 14 | 6 | 0 | -3.987751 | -0.822438 | -0.327638 |
| 15 | 6 | 0 | -3.478866 | 0.377197  | -0.835095 |
| 16 | 6 | 0 | -2.094455 | 0.583950  | -0.954622 |
| 17 | 6 | 0 | -1.230333 | -0.406149 | -0.488943 |
| 18 | 8 | 0 | -3.579665 | -3.007461 | 0.538368  |
| 19 | 8 | 0 | 0.125208  | -0.195955 | -0.617132 |
| 20 | 8 | 0 | -4.371519 | 1.342123  | -1.212577 |
| 21 | 8 | 0 | -1.339069 | 2.920931  | 1.052400  |
| 22 | 8 | 0 | 0.205510  | 2.361350  | 3.385926  |
| 23 | 8 | 0 | -3.189682 | 3.807456  | -0.951403 |
| 24 | 1 | 0 | -5.058428 | -0.979617 | -0.253561 |
| 25 | 1 | 0 | -1.707256 | 1.494791  | -1.393056 |
| 26 | 1 | 0 | -3.926761 | 2.225472  | -1.239900 |
| 27 | 1 | 0 | -2.731849 | -3.581166 | 0.659197  |
| 28 | 1 | 0 | 1.348782  | -3.031514 | 0.799867  |
| 29 | 1 | 0 | 0.662592  | -0.310572 | 1.361789  |
| 30 | 1 | 0 | 2.566743  | 0.963107  | 1.639772  |
| 31 | 1 | 0 | 4.923495  | 1.521239  | 1.080892  |
| 32 | 1 | 0 | 4.871137  | -1.435528 | -2.045303 |
| 33 | 1 | 0 | 2.528117  | -1.997772 | -1.472737 |
| 34 | 1 | 0 | 6.686743  | -0.085633 | -1.521030 |
| 35 | 1 | 0 | 0.645977  | 1.546870  | -0.709709 |
| 36 | 1 | 0 | -1.759191 | 2.046676  | 0.985038  |
| 37 | 1 | 0 | -2.536625 | 3.629433  | -0.239917 |
| 38 | 1 | 0 | -2.665663 | 4.082154  | -1.717775 |
| 39 | 1 | 0 | -0.357240 | 2.599968  | 2.619536  |
| 40 | 1 | 0 | 0.555041  | 1.485264  | 3.169921  |
| 41 | 8 | 0 | 0.789240  | 2.517067  | -0.643793 |
| 42 | 1 | 0 | -0.552097 | 2.851471  | 0.455237  |
| 43 | 1 | 0 | 1.651157  | 2.610533  | -0.212288 |

#### INT1-4wc

| Center Number | Atomic Number | Atomic Type | Coordinates (Angstroms) |           |           |
|---------------|---------------|-------------|-------------------------|-----------|-----------|
|               |               |             | X                       | Y         | Z         |
| 1             | 6             | 0           | -3.330517               | -1.309334 | 0.856960  |
| 2             | 6             | 0           | -3.328505               | -0.022108 | 0.279886  |
| 3             | 6             | 0           | -4.559261               | 0.484539  | -0.187560 |
| 4             | 6             | 0           | -5.731994               | -0.256536 | -0.086815 |
| 5             | 6             | 0           | -5.703676               | -1.535729 | 0.491071  |
| 6             | 6             | 0           | -4.496438               | -2.062275 | 0.964033  |
| 7             | 6             | 0           | -2.063635               | 0.704550  | 0.186700  |
| 8             | 6             | 0           | -1.854269               | 1.923675  | -0.350889 |
| 9             | 6             | 0           | -0.580388               | 2.664277  | -0.282183 |
| 10            | 8             | 0           | -0.711245               | 3.929368  | -0.167084 |
| 11            | 8             | 0           | -6.822372               | -2.311821 | 0.619398  |
| 12            | 6             | 0           | 0.735683                | 2.051967  | -0.242434 |
| 13            | 6             | 0           | 1.049383                | 0.728057  | -0.776997 |
| 14            | 6             | 0           | 2.349797                | 0.204506  | -0.527219 |
| 15            | 6             | 0           | 3.323206                | 0.948105  | 0.132530  |
| 16            | 6             | 0           | 3.071656                | 2.264052  | 0.562872  |
| 17            | 6             | 0           | 1.812648                | 2.807639  | 0.347211  |
| 18            | 8             | 0           | 0.205408                | 0.052217  | -1.485558 |
| 19            | 8             | 0           | 1.614325                | 4.088868  | 0.749671  |
| 20            | 8             | 0           | 4.569718                | 0.455213  | 0.368104  |
| 21            | 8             | 0           | 0.674967                | -2.420311 | -1.944903 |
| 22            | 8             | 0           | 2.603288                | -3.545008 | -0.486135 |
| 23            | 8             | 0           | 4.886302                | -2.161417 | -0.407558 |
| 24            | 8             | 0           | 6.412298                | -2.904674 | 1.836007  |

|    |   |   |           |           |           |
|----|---|---|-----------|-----------|-----------|
| 25 | 1 | 0 | 3.849370  | 2.852520  | 1.035822  |
| 26 | 1 | 0 | 2.584539  | -0.782450 | -0.906531 |
| 27 | 1 | 0 | 4.647784  | -0.473970 | 0.045355  |
| 28 | 1 | 0 | 0.690144  | 4.324003  | 0.435392  |
| 29 | 1 | 0 | -2.677318 | 2.519643  | -0.738216 |
| 30 | 1 | 0 | -1.205282 | 0.179732  | 0.596505  |
| 31 | 1 | 0 | -2.397170 | -1.726733 | 1.225315  |
| 32 | 1 | 0 | -4.485604 | -3.052211 | 1.408464  |
| 33 | 1 | 0 | -6.669688 | 0.152556  | -0.453859 |
| 34 | 1 | 0 | -4.607790 | 1.471365  | -0.636275 |
| 35 | 1 | 0 | -7.598018 | -1.852850 | 0.265994  |
| 36 | 1 | 0 | 0.496480  | -1.425165 | -1.757735 |
| 37 | 1 | 0 | 2.259437  | -3.706110 | 0.402556  |
| 38 | 1 | 0 | 4.036400  | -2.682169 | -0.462626 |
| 39 | 1 | 0 | 5.341138  | -2.283287 | -1.252194 |
| 40 | 1 | 0 | 5.890344  | -2.688155 | 1.035444  |
| 41 | 1 | 0 | 6.545634  | -3.860645 | 1.804949  |
| 42 | 1 | 0 | 1.856027  | -3.130293 | -1.003423 |
| 43 | 1 | 0 | -0.180092 | -2.867566 | -1.903477 |

### TS2-4wc

| Center Number | Atomic Number | Atomic Type | Coordinates (Angstroms) |           |           |
|---------------|---------------|-------------|-------------------------|-----------|-----------|
|               |               |             | X                       | Y         | Z         |
| 1             | 6             | 0           | 0.772052                | 0.820255  | -0.303739 |
| 2             | 6             | 0           | 0.829017                | 2.200241  | 0.074109  |
| 3             | 6             | 0           | 2.114991                | 2.788627  | 0.220593  |
| 4             | 6             | 0           | 3.291456                | 2.044424  | 0.096921  |
| 5             | 6             | 0           | 3.200168                | 0.691251  | -0.248271 |
| 6             | 6             | 0           | 1.955982                | 0.085932  | -0.473565 |
| 7             | 6             | 0           | -0.384069               | 3.058855  | 0.079612  |
| 8             | 8             | 0           | -0.232646               | 4.340402  | -0.047724 |
| 9             | 8             | 0           | 2.213775                | 4.118816  | 0.472906  |
| 10            | 8             | 0           | 4.362463                | -0.012620 | -0.354477 |
| 11            | 8             | 0           | -0.396666               | 0.198091  | -0.526310 |
| 12            | 6             | 0           | -1.629714               | 2.418109  | 0.123315  |
| 13            | 6             | 0           | -1.667910               | 1.044602  | 0.501707  |
| 14            | 6             | 0           | -2.877749               | 0.215974  | 0.328010  |
| 15            | 6             | 0           | -3.766366               | 0.409875  | -0.742529 |
| 16            | 6             | 0           | -4.875808               | -0.414826 | -0.917016 |
| 17            | 6             | 0           | -5.110492               | -1.463595 | -0.015959 |
| 18            | 6             | 0           | -4.233733               | -1.679834 | 1.054990  |
| 19            | 6             | 0           | -3.129164               | -0.846814 | 1.214693  |
| 20            | 8             | 0           | -6.176351               | -2.312372 | -0.132623 |
| 21            | 8             | 0           | -0.579467               | -2.452600 | -0.439004 |
| 22            | 8             | 0           | 1.708538                | -3.594189 | 0.429388  |
| 23            | 8             | 0           | 3.935692                | -2.701051 | -0.772240 |
| 24            | 8             | 0           | 6.221274                | -3.553555 | 0.634807  |
| 25            | 1             | 0           | 4.257074                | 2.518423  | 0.233660  |
| 26            | 1             | 0           | 1.895163                | -0.960054 | -0.747264 |
| 27            | 1             | 0           | 4.178907                | -0.961205 | -0.550911 |
| 28            | 1             | 0           | 1.271597                | 4.470519  | 0.302912  |
| 29            | 1             | 0           | -2.520089               | 2.937369  | -0.215255 |
| 30            | 1             | 0           | -1.101252               | 0.770501  | 1.393310  |
| 31            | 1             | 0           | -2.448140               | -1.021557 | 2.043708  |
| 32            | 1             | 0           | -4.426949               | -2.495505 | 1.744094  |
| 33            | 1             | 0           | -5.552448               | -0.254140 | -1.752264 |
| 34            | 1             | 0           | -3.580988               | 1.206546  | -1.455916 |
| 35            | 1             | 0           | -6.713612               | -2.080232 | -0.903730 |
| 36            | 1             | 0           | -0.512724               | -1.457198 | -0.470569 |
| 37            | 1             | 0           | 1.761138                | -3.488731 | 1.388667  |
| 38            | 1             | 0           | 3.098334                | -3.039727 | -0.351197 |
| 39            | 1             | 0           | 3.916064                | -2.987191 | -1.695843 |
| 40            | 1             | 0           | 5.419398                | -3.303166 | 0.130750  |
| 41            | 1             | 0           | 6.226358                | -4.519210 | 0.646392  |
| 42            | 1             | 0           | 0.849874                | -3.178900 | 0.152764  |
| 43            | 1             | 0           | -1.402556               | -2.642381 | 0.031696  |

### INT2-4wc

| Center | Atomic | Atomic | Coordinates (Angstroms) |  |  |
|--------|--------|--------|-------------------------|--|--|
|--------|--------|--------|-------------------------|--|--|

| Number | Number | Type | X         | Y         | Z         |
|--------|--------|------|-----------|-----------|-----------|
| 1      | 6      | 0    | -3.195710 | -0.811223 | 1.286701  |
| 2      | 6      | 0    | -2.767681 | 0.194589  | 0.408634  |
| 3      | 6      | 0    | -3.510893 | 0.420384  | -0.757377 |
| 4      | 6      | 0    | -4.649914 | -0.332284 | -1.044261 |
| 5      | 6      | 0    | -5.060530 | -1.334581 | -0.155002 |
| 6      | 6      | 0    | -4.332338 | -1.574580 | 1.015978  |
| 7      | 6      | 0    | -1.487743 | 0.947655  | 0.677282  |
| 8      | 6      | 0    | -1.509972 | 2.415368  | 0.367070  |
| 9      | 6      | 0    | -0.322151 | 3.077253  | 0.185687  |
| 10     | 8      | 0    | -0.158999 | 4.380031  | 0.062600  |
| 11     | 8      | 0    | -6.168157 | -2.110739 | -0.376479 |
| 12     | 6      | 0    | 0.899660  | 2.235603  | 0.082780  |
| 13     | 6      | 0    | 0.797290  | 0.847340  | -0.091840 |
| 14     | 6      | 0    | 1.909606  | 0.030744  | -0.288004 |
| 15     | 6      | 0    | 3.181501  | 0.627863  | -0.309861 |
| 16     | 6      | 0    | 3.330438  | 2.010834  | -0.153038 |
| 17     | 6      | 0    | 2.192929  | 2.809463  | 0.024522  |
| 18     | 8      | 0    | -0.445688 | 0.258457  | -0.134889 |
| 19     | 8      | 0    | 2.315205  | 4.154380  | 0.119407  |
| 20     | 8      | 0    | 4.313138  | -0.115763 | -0.476288 |
| 21     | 8      | 0    | -0.751772 | -2.460303 | -0.491152 |
| 22     | 8      | 0    | 1.524605  | -3.721113 | 0.299485  |
| 23     | 8      | 0    | 3.812367  | -2.808623 | -0.774450 |
| 24     | 8      | 0    | 5.997961  | -3.617148 | 0.811992  |
| 25     | 1      | 0    | 4.315556  | 2.463397  | -0.189281 |
| 26     | 1      | 0    | 1.790558  | -1.038989 | -0.404299 |
| 27     | 1      | 0    | 4.091676  | -1.068747 | -0.594584 |
| 28     | 1      | 0    | 1.323501  | 4.481558  | 0.106908  |
| 29     | 1      | 0    | -2.453150 | 2.949131  | 0.424983  |
| 30     | 1      | 0    | -1.177806 | 0.745349  | 1.717732  |
| 31     | 1      | 0    | -2.630190 | -1.005842 | 2.194600  |
| 32     | 1      | 0    | -4.662812 | -2.350785 | 1.698728  |
| 33     | 1      | 0    | -5.215814 | -0.145996 | -1.953266 |
| 34     | 1      | 0    | -3.190322 | 1.192907  | -1.449711 |
| 35     | 1      | 0    | -6.593398 | -1.863648 | -1.210237 |
| 36     | 1      | 0    | -0.665324 | -1.487654 | -0.371078 |
| 37     | 1      | 0    | 1.554619  | -3.724535 | 1.265516  |
| 38     | 1      | 0    | 2.954417  | -3.150171 | -0.403586 |
| 39     | 1      | 0    | 3.856547  | -3.113227 | -1.691323 |
| 40     | 1      | 0    | 5.234577  | -3.382985 | 0.244787  |
| 41     | 1      | 0    | 6.029388  | -4.582374 | 0.814744  |
| 42     | 1      | 0    | 0.672196  | -3.283211 | 0.051284  |
| 43     | 1      | 0    | -1.590431 | -2.694180 | -0.069360 |

#### INT1-4wd

| Center Number | Atomic Number | Atomic Type | Coordinates (Angstroms) |           |           |
|---------------|---------------|-------------|-------------------------|-----------|-----------|
|               |               |             | X                       | Y         | Z         |
| 1             | 6             | 0           | 3.138340                | 0.895043  | 0.724580  |
| 2             | 6             | 0           | 2.969220                | -0.380047 | 0.144913  |
| 3             | 6             | 0           | 4.121296                | -1.039006 | -0.332330 |
| 4             | 6             | 0           | 5.379002                | -0.452351 | -0.241566 |
| 5             | 6             | 0           | 5.517333                | 0.820462  | 0.334625  |
| 6             | 6             | 0           | 4.390729                | 1.494963  | 0.819376  |
| 7             | 6             | 0           | 1.621401                | -0.936384 | 0.058309  |
| 8             | 6             | 0           | 1.240082                | -2.085273 | -0.537823 |
| 9             | 6             | 0           | -0.122219               | -2.644984 | -0.472273 |
| 10            | 8             | 0           | -0.183374               | -3.917797 | -0.452340 |
| 11            | 8             | 0           | 6.726201                | 1.448676  | 0.451791  |
| 12            | 6             | 0           | -1.328378               | -1.845465 | -0.326380 |
| 13            | 6             | 0           | -1.455994               | -0.463511 | -0.767227 |
| 14            | 6             | 0           | -2.623525               | 0.246157  | -0.382723 |
| 15            | 6             | 0           | -3.641145               | -0.353685 | 0.356599  |
| 16            | 6             | 0           | -3.590374               | -1.720327 | 0.681833  |
| 17            | 6             | 0           | -2.467517               | -2.452288 | 0.311338  |
| 18            | 8             | 0           | -0.562539               | 0.118853  | -1.507929 |
| 19            | 8             | 0           | -2.457589               | -3.773312 | 0.623687  |
| 20            | 8             | 0           | -4.732265               | 0.351520  | 0.760949  |
| 21            | 8             | 0           | -0.454413               | 2.583411  | -0.974567 |
| 22            | 8             | 0           | -4.007368               | 2.987786  | 0.806337  |
| 23            | 8             | 0           | -2.838601               | 3.755488  | -1.617176 |
| 24            | 8             | 0           | -1.348619               | 2.405721  | 1.644736  |

|    |   |   |           |           |           |
|----|---|---|-----------|-----------|-----------|
| 25 | 1 | 0 | -4.404990 | -2.198082 | 1.213803  |
| 26 | 1 | 0 | -2.734694 | 1.267525  | -0.719931 |
| 27 | 1 | 0 | -4.550326 | 1.324755  | 0.686785  |
| 28 | 1 | 0 | -1.611940 | -4.134886 | 0.226964  |
| 29 | 1 | 0 | 1.965523  | -2.758243 | -0.988762 |
| 30 | 1 | 0 | 0.850360  | -0.329097 | 0.523714  |
| 31 | 1 | 0 | 2.267649  | 1.425870  | 1.100660  |
| 32 | 1 | 0 | 4.509376  | 2.477879  | 1.263659  |
| 33 | 1 | 0 | 6.254712  | -0.978209 | -0.612405 |
| 34 | 1 | 0 | 4.040420  | -2.025582 | -0.777074 |
| 35 | 1 | 0 | 7.433995  | 0.897507  | 0.087489  |
| 36 | 1 | 0 | -0.470555 | 1.577467  | -1.254140 |
| 37 | 1 | 0 | -1.476238 | 1.446256  | 1.692677  |
| 38 | 1 | 0 | -3.139466 | 2.880856  | 1.253597  |
| 39 | 1 | 0 | -3.756543 | 3.344050  | -0.074602 |
| 40 | 1 | 0 | -1.916308 | 3.430010  | -1.472094 |
| 41 | 1 | 0 | -2.765241 | 4.695481  | -1.827483 |
| 42 | 1 | 0 | -0.933924 | 2.536536  | 0.758923  |
| 43 | 1 | 0 | 0.417221  | 2.937309  | -1.193190 |

### TS2-4wd

| Center<br>Number | Atomic<br>Number | Atomic<br>Type | Coordinates (Angstroms) |           |           |
|------------------|------------------|----------------|-------------------------|-----------|-----------|
|                  |                  |                | X                       | Y         | Z         |
| 1                | 6                | 0              | 1.169090                | 0.448216  | -0.359219 |
| 2                | 6                | 0              | 1.556425                | 1.781171  | -0.018737 |
| 3                | 6                | 0              | 2.946093                | 2.045049  | 0.121623  |
| 4                | 6                | 0              | 3.907123                | 1.032240  | 0.040979  |
| 5                | 6                | 0              | 3.492500                | -0.269327 | -0.261089 |
| 6                | 6                | 0              | 2.139631                | -0.553726 | -0.501468 |
| 7                | 6                | 0              | 0.583580                | 2.905245  | -0.039419 |
| 8                | 8                | 0              | 1.038336                | 4.108781  | -0.200613 |
| 9                | 8                | 0              | 3.362550                | 3.318693  | 0.335934  |
| 10               | 8                | 0              | 4.438897                | -1.247672 | -0.318349 |
| 11               | 8                | 0              | -0.119752               | 0.115841  | -0.571352 |
| 12               | 6                | 0              | -0.776786               | 2.579614  | 0.018706  |
| 13               | 6                | 0              | -1.140098               | 1.261803  | 0.429418  |
| 14               | 6                | 0              | -2.516367               | 0.748730  | 0.273781  |
| 15               | 6                | 0              | -3.333121               | 1.127029  | -0.804758 |
| 16               | 6                | 0              | -4.613999               | 0.600940  | -0.957823 |
| 17               | 6                | 0              | -5.099682               | -0.327821 | -0.025802 |
| 18               | 6                | 0              | -4.299304               | -0.725629 | 1.052737  |
| 19               | 6                | 0              | -3.020448               | -0.191781 | 1.190285  |
| 20               | 8                | 0              | -6.345543               | -0.884155 | -0.119395 |
| 21               | 8                | 0              | -0.615528               | -2.377395 | 0.097220  |
| 22               | 8                | 0              | 1.412829                | -2.576580 | 2.014534  |
| 23               | 8                | 0              | 3.200419                | -3.638056 | 0.086682  |
| 24               | 8                | 0              | 0.955437                | -3.938478 | -1.558997 |
| 25               | 1                | 0              | 4.956664                | 1.259699  | 0.191249  |
| 26               | 1                | 0              | 1.834141                | -1.552992 | -0.780125 |
| 27               | 1                | 0              | 4.009374                | -2.142181 | -0.285582 |
| 28               | 1                | 0              | 2.532355                | 3.882115  | 0.152176  |
| 29               | 1                | 0              | -1.521618               | 3.289554  | -0.324854 |
| 30               | 1                | 0              | -0.656070               | 0.884870  | 1.332606  |
| 31               | 1                | 0              | -2.401438               | -0.506301 | 2.026557  |
| 32               | 1                | 0              | -4.687021               | -1.446155 | 1.765505  |
| 33               | 1                | 0              | -5.232758               | 0.901373  | -1.799063 |
| 34               | 1                | 0              | -2.958149               | 1.831682  | -1.540177 |
| 35               | 1                | 0              | -6.813961               | -0.542872 | -0.894967 |
| 36               | 1                | 0              | -0.500373               | -1.419678 | -0.186595 |
| 37               | 1                | 0              | 1.727944                | -1.660668 | 2.012995  |
| 38               | 1                | 0              | 2.667811                | -3.383142 | 0.871605  |
| 39               | 1                | 0              | 2.517359                | -3.861781 | -0.582796 |
| 40               | 1                | 0              | 0.272421                | -3.474756 | -1.022728 |
| 41               | 1                | 0              | 0.606213                | -4.821197 | -1.738641 |
| 42               | 1                | 0              | 0.614485                | -2.553971 | 1.440864  |
| 43               | 1                | 0              | -1.556363               | -2.501960 | 0.281368  |

### INT2-4wd

| Center | Atomic | Atomic | Coordinates (Angstroms) |  |  |
|--------|--------|--------|-------------------------|--|--|
|--------|--------|--------|-------------------------|--|--|

| Number | Number | Type | X         | Y         | Z         |
|--------|--------|------|-----------|-----------|-----------|
| 1      | 6      | 0    | 3.093368  | 0.097722  | 1.251129  |
| 2      | 6      | 0    | 2.439998  | -0.754468 | 0.349480  |
| 3      | 6      | 0    | 3.110089  | -1.119374 | -0.825752 |
| 4      | 6      | 0    | 4.396192  | -0.651892 | -1.097772 |
| 5      | 6      | 0    | 5.031497  | 0.200175  | -0.184118 |
| 6      | 6      | 0    | 4.379151  | 0.575415  | 0.995715  |
| 7      | 6      | 0    | 1.020726  | -1.193805 | 0.612306  |
| 8      | 6      | 0    | 0.684160  | -2.606308 | 0.236232  |
| 9      | 6      | 0    | -0.631699 | -2.956625 | 0.064855  |
| 10     | 8      | 0    | -1.105309 | -4.174679 | -0.107528 |
| 11     | 8      | 0    | 6.292634  | 0.696527  | -0.389479 |
| 12     | 6      | 0    | -1.616557 | -1.842989 | 0.034838  |
| 13     | 6      | 0    | -1.186495 | -0.513691 | -0.085310 |
| 14     | 6      | 0    | -2.072719 | 0.552020  | -0.212101 |
| 15     | 6      | 0    | -3.452658 | 0.287163  | -0.203652 |
| 16     | 6      | 0    | -3.927279 | -1.026532 | -0.103334 |
| 17     | 6      | 0    | -3.011830 | -2.083530 | -0.005254 |
| 18     | 8      | 0    | 0.162755  | -0.234102 | -0.143206 |
| 19     | 8      | 0    | -3.453686 | -3.363086 | 0.035295  |
| 20     | 8      | 0    | -4.364868 | 1.296038  | -0.290318 |
| 21     | 8      | 0    | 0.727169  | 2.421734  | 0.130392  |
| 22     | 8      | 0    | -3.097903 | 3.699536  | -0.117760 |
| 23     | 8      | 0    | -0.852109 | 3.699712  | -1.803808 |
| 24     | 8      | 0    | -1.189706 | 3.402956  | 1.929213  |
| 25     | 1      | 0    | -4.993234 | -1.227313 | -0.116270 |
| 26     | 1      | 0    | -1.705306 | 1.562999  | -0.304378 |
| 27     | 1      | 0    | -3.910136 | 2.178696  | -0.266540 |
| 28     | 1      | 0    | -2.572642 | -3.918065 | -0.022303 |
| 29     | 1      | 0    | 1.472224  | -3.352417 | 0.243602  |
| 30     | 1      | 0    | 0.779099  | -0.974236 | 1.667368  |
| 31     | 1      | 0    | 2.589641  | 0.395236  | 2.167510  |
| 32     | 1      | 0    | 4.883493  | 1.232430  | 1.697025  |
| 33     | 1      | 0    | 4.904411  | -0.945139 | -2.012796 |
| 34     | 1      | 0    | 2.617443  | -1.776518 | -1.535889 |
| 35     | 1      | 0    | 6.648510  | 0.378508  | -1.231493 |
| 36     | 1      | 0    | 0.620436  | 1.444097  | 0.029201  |
| 37     | 1      | 0    | -1.405393 | 2.717496  | 2.575762  |
| 38     | 1      | 0    | -2.554630 | 3.659094  | 0.699864  |
| 39     | 1      | 0    | -2.425834 | 3.800063  | -0.826258 |
| 40     | 1      | 0    | -0.169131 | 3.322426  | -1.208453 |
| 41     | 1      | 0    | -0.496832 | 4.539853  | -2.122401 |
| 42     | 1      | 0    | -0.442168 | 3.044750  | 1.402960  |
| 43     | 1      | 0    | 1.672589  | 2.581263  | 0.257506  |

### INT1-4we

| Center Number | Atomic Number | Atomic Type | Coordinates (Angstroms) |           |           |
|---------------|---------------|-------------|-------------------------|-----------|-----------|
|               |               |             | X                       | Y         | Z         |
| 1             | 6             | 0           | -2.325404               | 0.037157  | -0.860808 |
| 2             | 6             | 0           | -2.592896               | -1.232199 | -0.186329 |
| 3             | 6             | 0           | -3.775715               | -1.330564 | 0.630336  |
| 4             | 6             | 0           | -4.547166               | -0.221646 | 0.962195  |
| 5             | 6             | 0           | -4.203896               | 1.016212  | 0.386224  |
| 6             | 6             | 0           | -3.199845               | 1.117466  | -0.561151 |
| 7             | 6             | 0           | -1.714934               | -2.384826 | -0.253639 |
| 8             | 8             | 0           | -2.153428               | -3.560482 | -0.031184 |
| 9             | 8             | 0           | -4.136365               | -2.525894 | 1.169650  |
| 10            | 8             | 0           | -4.898602               | 2.131349  | 0.774663  |
| 11            | 8             | 0           | -1.362814               | 0.219919  | -1.699137 |
| 12            | 6             | 0           | -0.257252               | -2.272587 | -0.457857 |
| 13            | 6             | 0           | 0.474876                | -1.257214 | 0.044909  |
| 14            | 6             | 0           | 1.925790                | -1.095394 | 0.010229  |
| 15            | 6             | 0           | 2.779614                | -1.873631 | -0.801033 |
| 16            | 6             | 0           | 4.152879                | -1.664247 | -0.813835 |
| 17            | 6             | 0           | 4.725601                | -0.662209 | -0.010995 |
| 18            | 6             | 0           | 3.897622                | 0.124875  | 0.806871  |
| 19            | 6             | 0           | 2.519992                | -0.096368 | 0.808353  |
| 20            | 8             | 0           | 6.071346                | -0.498099 | -0.067902 |
| 21            | 8             | 0           | 6.839676                | 1.557289  | 1.561626  |
| 22            | 8             | 0           | -0.625798               | 2.786634  | -1.135050 |
| 23            | 8             | 0           | -2.674686               | 3.996469  | 0.414418  |
| 24            | 8             | 0           | 2.236321                | 2.659788  | -1.014729 |

|    |   |   |           |           |           |
|----|---|---|-----------|-----------|-----------|
| 25 | 1 | 0 | -5.374405 | -0.312614 | 1.656658  |
| 26 | 1 | 0 | -3.032859 | 2.058390  | -1.065690 |
| 27 | 1 | 0 | -4.346230 | 2.910829  | 0.554904  |
| 28 | 1 | 0 | -3.504924 | -3.196892 | 0.782634  |
| 29 | 1 | 0 | 0.209045  | -3.150233 | -0.899438 |
| 30 | 1 | 0 | -0.061359 | -0.452760 | 0.543076  |
| 31 | 1 | 0 | 1.889082  | 0.514278  | 1.449848  |
| 32 | 1 | 0 | 4.335560  | 0.896979  | 1.431590  |
| 33 | 1 | 0 | 4.800594  | -2.261091 | -1.448336 |
| 34 | 1 | 0 | 2.362215  | -2.642610 | -1.443591 |
| 35 | 1 | 0 | 6.364369  | 0.237080  | 0.521090  |
| 36 | 1 | 0 | -0.847048 | 1.849785  | -1.395904 |
| 37 | 1 | 0 | -1.918797 | 3.607860  | -0.085424 |
| 38 | 1 | 0 | -2.667230 | 4.942341  | 0.220073  |
| 39 | 1 | 0 | 0.344112  | 2.812656  | -1.031776 |
| 40 | 1 | 0 | 2.521085  | 1.820378  | -0.618596 |
| 41 | 1 | 0 | 2.717408  | 3.343764  | -0.528879 |
| 42 | 1 | 0 | 7.210222  | 2.326318  | 1.105492  |
| 43 | 1 | 0 | 7.478368  | 1.330818  | 2.252624  |

### TS2-4we

| Center<br>Number | Atomic<br>Number | Atomic<br>Type | Coordinates (Angstroms) |           |           |
|------------------|------------------|----------------|-------------------------|-----------|-----------|
|                  |                  |                | X                       | Y         | Z         |
| 1                | 6                | 0              | 2.131984                | -2.318812 | -0.635668 |
| 2                | 6                | 0              | 1.457991                | -1.544193 | 0.325296  |
| 3                | 6                | 0              | 2.209912                | -0.635856 | 1.088882  |
| 4                | 6                | 0              | 3.578765                | -0.481069 | 0.895182  |
| 5                | 6                | 0              | 4.226525                | -1.231523 | -0.097175 |
| 6                | 6                | 0              | 3.501547                | -2.173743 | -0.843173 |
| 7                | 6                | 0              | -0.008663               | -1.542162 | 0.471770  |
| 8                | 6                | 0              | -0.846063               | -2.635505 | 0.109769  |
| 9                | 6                | 0              | -2.230189               | -2.408635 | 0.057999  |
| 10               | 8                | 0              | -3.120401               | -3.344989 | -0.048875 |
| 11               | 8                | 0              | 5.554139                | -1.074920 | -0.371055 |
| 12               | 6                | 0              | -2.685555               | -0.994897 | 0.017422  |
| 13               | 6                | 0              | -4.059903               | -0.678189 | 0.198729  |
| 14               | 6                | 0              | -4.544807               | 0.631246  | 0.096326  |
| 15               | 6                | 0              | -3.655598               | 1.636873  | -0.300322 |
| 16               | 6                | 0              | -2.335337               | 1.339694  | -0.639141 |
| 17               | 6                | 0              | -1.814375               | 0.057395  | -0.415496 |
| 18               | 8                | 0              | -4.935577               | -1.674426 | 0.496287  |
| 19               | 8                | 0              | -0.502889               | -0.119455 | -0.609660 |
| 20               | 8                | 0              | -4.093049               | 2.935398  | -0.338236 |
| 21               | 8                | 0              | 0.542807                | 2.346792  | 0.320284  |
| 22               | 8                | 0              | 3.285655                | 2.758238  | -0.345445 |
| 23               | 8                | 0              | 5.937860                | 1.640627  | 0.235187  |
| 24               | 8                | 0              | -1.578604               | 4.234025  | 0.250276  |
| 25               | 1                | 0              | -5.583408               | 0.852512  | 0.315871  |
| 26               | 1                | 0              | -1.674617               | 2.119896  | -0.987752 |
| 27               | 1                | 0              | -3.304518               | 3.518055  | -0.300389 |
| 28               | 1                | 0              | -4.405805               | -2.525539 | 0.325313  |
| 29               | 1                | 0              | -0.438066               | -3.586635 | -0.216533 |
| 30               | 1                | 0              | -0.334129               | -0.958579 | 1.334228  |
| 31               | 1                | 0              | 1.707762                | -0.020999 | 1.830442  |
| 32               | 1                | 0              | 4.140238                | 0.230355  | 1.491030  |
| 33               | 1                | 0              | 4.016257                | -2.753530 | -1.602958 |
| 34               | 1                | 0              | 1.574412                | -3.017913 | -1.251226 |
| 35               | 1                | 0              | 5.849085                | -0.199822 | -0.042886 |
| 36               | 1                | 0              | 0.291598                | 1.458396  | -0.018370 |
| 37               | 1                | 0              | -0.795424               | 3.636922  | 0.263059  |
| 38               | 1                | 0              | -1.259883               | 5.091510  | -0.059024 |
| 39               | 1                | 0              | 1.494930                | 2.457174  | 0.129930  |
| 40               | 1                | 0              | 4.115595                | 2.314338  | -0.087985 |
| 41               | 1                | 0              | 3.523468                | 3.682671  | -0.495725 |
| 42               | 1                | 0              | 6.524212                | 2.051137  | -0.417833 |
| 43               | 1                | 0              | 6.281378                | 1.915978  | 1.098300  |

### INT2-4we

| Center | Atomic | Atomic | Coordinates (Angstroms) |  |  |
|--------|--------|--------|-------------------------|--|--|
|--------|--------|--------|-------------------------|--|--|

| Number | Number | Type | X         | Y         | Z         |
|--------|--------|------|-----------|-----------|-----------|
| 1      | 6      | 0    | -1.829709 | 0.043972  | -0.224878 |
| 2      | 6      | 0    | -2.744788 | -0.989267 | 0.026245  |
| 3      | 6      | 0    | -4.120907 | -0.654839 | 0.031221  |
| 4      | 6      | 0    | -4.548758 | 0.674582  | -0.118113 |
| 5      | 6      | 0    | -3.592121 | 1.669898  | -0.348400 |
| 6      | 6      | 0    | -2.234870 | 1.351791  | -0.462617 |
| 7      | 6      | 0    | -2.272284 | -2.395818 | 0.138450  |
| 8      | 8      | 0    | -3.190296 | -3.337649 | 0.056880  |
| 9      | 8      | 0    | -5.029804 | -1.648244 | 0.187807  |
| 10     | 8      | 0    | -3.995122 | 2.976711  | -0.448047 |
| 11     | 8      | 0    | -0.483431 | -0.214140 | -0.278318 |
| 12     | 6      | 0    | -0.916374 | -2.570700 | 0.280837  |
| 13     | 6      | 0    | -0.072827 | -1.365990 | 0.576536  |
| 14     | 6      | 0    | 1.414582  | -1.471171 | 0.362375  |
| 15     | 6      | 0    | 1.972413  | -2.210324 | -0.690052 |
| 16     | 6      | 0    | 3.335743  | -2.133632 | -0.978553 |
| 17     | 6      | 0    | 4.164140  | -1.297955 | -0.216875 |
| 18     | 6      | 0    | 3.629824  | -0.592134 | 0.870020  |
| 19     | 6      | 0    | 2.266322  | -0.679948 | 1.143912  |
| 20     | 8      | 0    | 5.484549  | -1.201377 | -0.562845 |
| 21     | 8      | 0    | 5.997977  | 1.477483  | 0.139728  |
| 22     | 8      | 0    | 0.677371  | 2.420510  | 0.479717  |
| 23     | 8      | 0    | -1.490202 | 4.307774  | 0.259414  |
| 24     | 8      | 0    | 3.372964  | 2.696141  | -0.343103 |
| 25     | 1      | 0    | -5.603250 | 0.920624  | -0.053700 |
| 26     | 1      | 0    | -1.505284 | 2.112243  | -0.691863 |
| 27     | 1      | 0    | -3.205246 | 3.547937  | -0.343566 |
| 28     | 1      | 0    | -4.446603 | -2.507954 | 0.154768  |
| 29     | 1      | 0    | -0.474346 | -3.560003 | 0.343896  |
| 30     | 1      | 0    | -0.245328 | -0.991063 | 1.601653  |
| 31     | 1      | 0    | 1.853824  | -0.102590 | 1.967375  |
| 32     | 1      | 0    | 4.273063  | 0.032632  | 1.480541  |
| 33     | 1      | 0    | 3.763663  | -2.686957 | -1.808928 |
| 34     | 1      | 0    | 1.327158  | -2.828961 | -1.306787 |
| 35     | 1      | 0    | 5.841536  | -0.358009 | -0.216164 |
| 36     | 1      | 0    | 0.427377  | 1.508831  | 0.240481  |
| 37     | 1      | 0    | -0.691273 | 3.740789  | 0.332089  |
| 38     | 1      | 0    | -1.185995 | 5.159214  | -0.080323 |
| 39     | 1      | 0    | 1.621981  | 2.509622  | 0.237755  |
| 40     | 1      | 0    | 4.183665  | 2.207358  | -0.105395 |
| 41     | 1      | 0    | 3.659673  | 3.602911  | -0.514493 |
| 42     | 1      | 0    | 6.578205  | 1.899436  | -0.511382 |
| 43     | 1      | 0    | 6.372821  | 1.705482  | 1.003524  |

### INT1-5w

| Center Number | Atomic Number | Atomic Type | Coordinates (Angstroms) |           |           |
|---------------|---------------|-------------|-------------------------|-----------|-----------|
|               |               |             | X                       | Y         | Z         |
| 1             | 6             | 0           | -2.122408               | -0.039020 | -0.950296 |
| 2             | 6             | 0           | -2.683465               | -1.239902 | -0.328888 |
| 3             | 6             | 0           | -3.985858               | -1.138851 | 0.279881  |
| 4             | 6             | 0           | -4.629075               | 0.079480  | 0.471792  |
| 5             | 6             | 0           | -4.016359               | 1.237992  | -0.041351 |
| 6             | 6             | 0           | -2.860573               | 1.165851  | -0.800641 |
| 7             | 6             | 0           | -1.993539               | -2.515322 | -0.251728 |
| 8             | 8             | 0           | -2.633165               | -3.604616 | -0.088472 |
| 9             | 8             | 0           | -4.604959               | -2.251798 | 0.755270  |
| 10            | 8             | 0           | -4.600623               | 2.449605  | 0.214209  |
| 11            | 8             | 0           | -1.016793               | -0.015116 | -1.616358 |
| 12            | 6             | 0           | -0.520938               | -2.614182 | -0.263397 |
| 13            | 6             | 0           | 0.259917                | -1.683057 | 0.318875  |
| 14            | 6             | 0           | 1.716872                | -1.611828 | 0.373291  |
| 15            | 6             | 0           | 2.575869                | -2.502747 | -0.301583 |
| 16            | 6             | 0           | 3.952725                | -2.294612 | -0.326725 |
| 17            | 6             | 0           | 4.494435                | -1.183771 | 0.333419  |
| 18            | 6             | 0           | 3.671209                | -0.312062 | 1.048996  |
| 19            | 6             | 0           | 2.297885                | -0.526800 | 1.059996  |
| 20            | 8             | 0           | 5.832676                | -0.861585 | 0.275841  |
| 21            | 8             | 0           | 0.030047                | 2.306231  | -0.727902 |
| 22            | 8             | 0           | 2.880784                | 2.842238  | -0.362096 |
| 23            | 8             | 0           | 5.441091                | 1.804920  | -0.830034 |
| 24            | 8             | 0           | -2.128831               | 4.014366  | 0.156670  |



|    |   |   |           |           |           |
|----|---|---|-----------|-----------|-----------|
| 25 | 8 | 0 | 1.115870  | 2.562036  | 1.923942  |
| 26 | 1 | 0 | -5.566195 | 0.128523  | 1.014240  |
| 27 | 1 | 0 | -2.469140 | 2.056169  | -1.272465 |
| 28 | 1 | 0 | -3.923863 | 3.142177  | 0.065745  |
| 29 | 1 | 0 | -4.024339 | -3.019714 | 0.484786  |
| 30 | 1 | 0 | -0.117801 | -3.532218 | -0.684529 |
| 31 | 1 | 0 | -0.241892 | -0.830518 | 0.769641  |
| 32 | 1 | 0 | 1.662208  | 0.183341  | 1.580330  |
| 33 | 1 | 0 | 4.107463  | 0.540333  | 1.559292  |
| 34 | 1 | 0 | 4.600190  | -2.972314 | -0.876530 |
| 35 | 1 | 0 | 2.167118  | -3.350974 | -0.841551 |
| 36 | 1 | 0 | 6.326567  | -1.518426 | -0.236975 |
| 37 | 1 | 0 | -0.274451 | 1.436513  | -1.120789 |
| 38 | 1 | 0 | -1.349397 | 3.513340  | -0.165132 |
| 39 | 1 | 0 | -1.937951 | 4.946927  | -0.005856 |
| 40 | 1 | 0 | 0.988719  | 2.385614  | -0.878381 |
| 41 | 1 | 0 | 3.737107  | 2.385449  | -0.522355 |
| 42 | 1 | 0 | 3.048554  | 3.772102  | -0.567260 |
| 43 | 1 | 0 | 5.704705  | 1.835728  | -1.759486 |
| 44 | 1 | 0 | 5.722357  | 0.930181  | -0.504270 |
| 45 | 1 | 0 | 0.449892  | 2.385162  | 1.234021  |
| 46 | 1 | 0 | 1.921188  | 2.685334  | 1.389112  |

-----

### TS2-5w

| Center<br>Number | Atomic<br>Number | Atomic<br>Type | Coordinates (Angstroms) |           |           |
|------------------|------------------|----------------|-------------------------|-----------|-----------|
|                  |                  |                | X                       | Y         | Z         |
| 1                | 6                | 0              | 2.008032                | -2.439753 | -0.675298 |
| 2                | 6                | 0              | 1.393261                | -1.626374 | 0.290842  |
| 3                | 6                | 0              | 2.199269                | -0.750320 | 1.037773  |
| 4                | 6                | 0              | 3.572840                | -0.678406 | 0.829074  |
| 5                | 6                | 0              | 4.157849                | -1.480645 | -0.153716 |
| 6                | 6                | 0              | 3.382640                | -2.375155 | -0.900632 |
| 7                | 6                | 0              | -0.071449               | -1.581735 | 0.469692  |
| 8                | 6                | 0              | -0.917931               | -2.699905 | 0.228289  |
| 9                | 6                | 0              | -2.303574               | -2.478018 | 0.189828  |
| 10               | 8                | 0              | -3.193157               | -3.419570 | 0.197322  |
| 11               | 8                | 0              | 5.509130                | -1.310142 | -0.367348 |
| 12               | 6                | 0              | -2.760376               | -1.074895 | 0.020124  |
| 13               | 6                | 0              | -4.132974               | -0.743033 | 0.189685  |
| 14               | 6                | 0              | -4.623028               | 0.548280  | -0.038227 |
| 15               | 6                | 0              | -3.743468               | 1.509116  | -0.549095 |
| 16               | 6                | 0              | -2.426717               | 1.180801  | -0.874935 |
| 17               | 6                | 0              | -1.898653               | -0.070262 | -0.528312 |
| 18               | 8                | 0              | -5.001577               | -1.703969 | 0.600239  |
| 19               | 8                | 0              | -0.586575               | -0.262038 | -0.722212 |
| 20               | 8                | 0              | -4.186387               | 2.795147  | -0.714526 |
| 21               | 8                | 0              | 0.433959                | 2.231803  | -0.024849 |
| 22               | 8                | 0              | 3.233706                | 2.735933  | 0.085567  |
| 23               | 8                | 0              | 5.553270                | 1.520716  | -0.839903 |
| 24               | 8                | 0              | -1.681000               | 4.145695  | -0.261399 |
| 25               | 1                | 0              | -5.658747               | 0.789453  | 0.173692  |
| 26               | 1                | 0              | -1.775120               | 1.922135  | -1.313938 |
| 27               | 1                | 0              | -3.400553               | 3.382169  | -0.738925 |
| 28               | 1                | 0              | -4.473588               | -2.568091 | 0.508757  |
| 29               | 1                | 0              | -0.515966               | -3.677899 | -0.015404 |
| 30               | 1                | 0              | -0.367359               | -0.921491 | 1.286169  |
| 31               | 1                | 0              | 1.747120                | -0.094208 | 1.775464  |
| 32               | 1                | 0              | 4.190203                | 0.007951  | 1.399085  |
| 33               | 1                | 0              | 3.844709                | -2.994825 | -1.664119 |
| 34               | 1                | 0              | 1.404195                | -3.109883 | -1.278823 |
| 35               | 1                | 0              | 5.828720                | -1.906370 | -1.060740 |
| 36               | 1                | 0              | 0.183843                | 1.316827  | -0.299550 |
| 37               | 1                | 0              | -0.905520               | 3.545207  | -0.197089 |
| 38               | 1                | 0              | -1.355286               | 4.967087  | -0.651125 |
| 39               | 1                | 0              | 1.383349                | 2.343790  | -0.228149 |
| 40               | 1                | 0              | 4.015787                | 2.242173  | -0.253884 |
| 41               | 1                | 0              | 3.435396                | 3.669982  | -0.061276 |
| 42               | 1                | 0              | 5.752672                | 1.721788  | -1.764101 |
| 43               | 1                | 0              | 5.669009                | 0.555958  | -0.745650 |
| 44               | 8                | 0              | 1.730776                | 2.346075  | 2.552736  |
| 45               | 1                | 0              | 0.994428                | 2.271910  | 1.918613  |
| 46               | 1                | 0              | 2.491222                | 2.460957  | 1.955427  |

-----

## INT2-5w

| Center<br>Number | Atomic<br>Number | Atomic<br>Type | Coordinates (Angstroms) |           |           |
|------------------|------------------|----------------|-------------------------|-----------|-----------|
|                  |                  |                | X                       | Y         | Z         |
| 1                | 6                | 0              | -1.926143               | -0.056891 | -0.359039 |
| 2                | 6                | 0              | -2.839612               | -1.045556 | 0.035876  |
| 3                | 6                | 0              | -4.213360               | -0.701435 | 0.040341  |
| 4                | 6                | 0              | -4.637571               | 0.605801  | -0.247874 |
| 5                | 6                | 0              | -3.682866               | 1.559410  | -0.617475 |
| 6                | 6                | 0              | -2.331152               | 1.217697  | -0.736554 |
| 7                | 6                | 0              | -2.373555               | -2.433111 | 0.301928  |
| 8                | 8                | 0              | -3.298138               | -3.369667 | 0.357054  |
| 9                | 8                | 0              | -5.122679               | -1.661498 | 0.336621  |
| 10               | 8                | 0              | -4.081793               | 2.850228  | -0.850175 |
| 11               | 8                | 0              | -0.580496               | -0.331240 | -0.416708 |
| 12               | 6                | 0              | -1.015714               | -2.601580 | 0.428024  |
| 13               | 6                | 0              | -0.155140               | -1.379452 | 0.555554  |
| 14               | 6                | 0              | 1.323420                | -1.547133 | 0.314988  |
| 15               | 6                | 0              | 1.813329                | -2.343284 | -0.728327 |
| 16               | 6                | 0              | 3.175954                | -2.371530 | -1.032434 |
| 17               | 6                | 0              | 4.059871                | -1.590831 | -0.280709 |
| 18               | 6                | 0              | 3.597256                | -0.815415 | 0.783977  |
| 19               | 6                | 0              | 2.233611                | -0.795937 | 1.070466  |
| 20               | 8                | 0              | 5.409095                | -1.509486 | -0.566650 |
| 21               | 8                | 0              | 0.559803                | 2.296955  | 0.138933  |
| 22               | 8                | 0              | 3.369075                | 2.655309  | 0.067022  |
| 23               | 8                | 0              | 5.547393                | 1.322856  | -1.010925 |
| 24               | 8                | 0              | -1.586129               | 4.208303  | -0.240590 |
| 25               | 8                | 0              | 2.096211                | 2.319558  | 2.650446  |
| 26               | 1                | 0              | -5.687768               | 0.868353  | -0.179303 |
| 27               | 1                | 0              | -1.605870               | 1.941393  | -1.074498 |
| 28               | 1                | 0              | -3.290029               | 3.426422  | -0.800559 |
| 29               | 1                | 0              | -4.545594               | -2.524592 | 0.389310  |
| 30               | 1                | 0              | -0.575924               | -3.579843 | 0.593955  |
| 31               | 1                | 0              | -0.289105               | -0.885057 | 1.534201  |
| 32               | 1                | 0              | 1.877182                | -0.161164 | 1.876655  |
| 33               | 1                | 0              | 4.298657                | -0.220351 | 1.359795  |
| 34               | 1                | 0              | 3.544940                | -2.977872 | -1.855330 |
| 35               | 1                | 0              | 1.119420                | -2.930839 | -1.321763 |
| 36               | 1                | 0              | 5.640861                | -2.095922 | -1.301856 |
| 37               | 1                | 0              | 0.309741                | 1.375907  | -0.071694 |
| 38               | 1                | 0              | -0.799326               | 3.635677  | -0.116990 |
| 39               | 1                | 0              | -1.261681               | 5.033276  | -0.624121 |
| 40               | 1                | 0              | 1.503963                | 2.387814  | -0.103008 |
| 41               | 1                | 0              | 4.094115                | 2.113292  | -0.323607 |
| 42               | 1                | 0              | 3.623904                | 3.575480  | -0.085381 |
| 43               | 1                | 0              | 5.695941                | 1.518984  | -1.945691 |
| 44               | 1                | 0              | 5.627915                | 0.353417  | -0.925703 |
| 45               | 1                | 0              | 1.276008                | 2.296512  | 2.128815  |
| 46               | 1                | 0              | 2.773940                | 2.394052  | 1.954095  |

## INT1-5wb

| Center<br>Number | Atomic<br>Number | Atomic<br>Type | Coordinates (Angstroms) |           |           |
|------------------|------------------|----------------|-------------------------|-----------|-----------|
|                  |                  |                | X                       | Y         | Z         |
| 1                | 6                | 0              | -3.386959               | -1.843352 | 0.442352  |
| 2                | 6                | 0              | -2.392547               | -1.120970 | -0.250770 |
| 3                | 6                | 0              | -2.805352               | -0.021238 | -1.032187 |
| 4                | 6                | 0              | -4.145585               | 0.348284  | -1.122373 |
| 5                | 6                | 0              | -5.111285               | -0.382900 | -0.419329 |
| 6                | 6                | 0              | -4.728209               | -1.484197 | 0.362668  |
| 7                | 6                | 0              | -0.967819               | -1.431825 | -0.177526 |
| 8                | 6                | 0              | -0.382392               | -2.511331 | 0.386300  |
| 9                | 6                | 0              | 1.063650                | -2.778379 | 0.299018  |
| 10               | 8                | 0              | 1.397158                | -3.999664 | 0.141459  |
| 11               | 8                | 0              | -6.412369               | 0.025517  | -0.526580 |
| 12               | 6                | 0              | 2.063533                | -1.725224 | 0.266443  |
| 13               | 6                | 0              | 3.265526                | -1.953897 | -0.483313 |
| 14               | 6                | 0              | 4.163611                | -0.934466 | -0.770742 |
| 15               | 6                | 0              | 3.914234                | 0.347898  | -0.247504 |
| 16               | 6                | 0              | 2.836984                | 0.587269  | 0.602456  |

|    |   |   |           |           |           |
|----|---|---|-----------|-----------|-----------|
| 17 | 6 | 0 | 1.902355  | -0.433842 | 0.919313  |
| 18 | 8 | 0 | 3.538313  | -3.188332 | -0.990780 |
| 19 | 8 | 0 | 0.971482  | -0.212051 | 1.799840  |
| 20 | 8 | 0 | 4.795981  | 1.333043  | -0.579938 |
| 21 | 8 | 0 | 1.039280  | 3.067959  | -0.624805 |
| 22 | 8 | 0 | -1.702528 | 3.683373  | -1.245456 |
| 23 | 8 | 0 | 3.693111  | 3.796703  | -0.135271 |
| 24 | 1 | 0 | 5.034644  | -1.124518 | -1.387520 |
| 25 | 1 | 0 | 2.721736  | 1.554924  | 1.075207  |
| 26 | 1 | 0 | 4.433708  | 2.221268  | -0.329851 |
| 27 | 1 | 0 | 2.835844  | -3.794803 | -0.627177 |
| 28 | 1 | 0 | -0.969176 | -3.326719 | 0.801651  |
| 29 | 1 | 0 | -0.318423 | -0.694096 | -0.644564 |
| 30 | 1 | 0 | -2.061152 | 0.562495  | -1.566273 |
| 31 | 1 | 0 | -4.449452 | 1.201600  | -1.719606 |
| 32 | 1 | 0 | -5.479728 | -2.044777 | 0.911250  |
| 33 | 1 | 0 | -3.111301 | -2.688568 | 1.064490  |
| 34 | 1 | 0 | -6.991254 | -0.537730 | 0.009488  |
| 35 | 1 | 0 | 0.413930  | 1.315701  | 1.810696  |
| 36 | 1 | 0 | 1.255894  | 2.237589  | -1.076388 |
| 37 | 1 | 0 | 2.733087  | 3.624171  | -0.285247 |
| 38 | 1 | 0 | 3.762915  | 4.088708  | 0.785006  |
| 39 | 1 | 0 | -0.743298 | 3.519589  | -1.145804 |
| 40 | 1 | 0 | -2.098715 | 3.291092  | -0.442857 |
| 41 | 8 | 0 | -2.676686 | 2.381594  | 1.121555  |
| 42 | 1 | 0 | -3.095420 | 1.575413  | 0.776743  |
| 43 | 1 | 0 | -3.323465 | 2.786005  | 1.717761  |
| 44 | 8 | 0 | 0.090136  | 2.268512  | 1.756162  |
| 45 | 1 | 0 | 0.717028  | 2.778842  | 0.277206  |
| 46 | 1 | 0 | -0.876901 | 2.229628  | 1.617469  |

## TS2-5wb

| Center<br>Number | Atomic<br>Number | Atomic<br>Type | Coordinates (Angstroms) |           |           |
|------------------|------------------|----------------|-------------------------|-----------|-----------|
|                  |                  |                | X                       | Y         | Z         |
| 1                | 6                | 0              | 2.623919                | -1.912677 | -0.895344 |
| 2                | 6                | 0              | 1.969338                | -1.452040 | 0.261186  |
| 3                | 6                | 0              | 2.727959                | -0.770755 | 1.228651  |
| 4                | 6                | 0              | 4.101534                | -0.583998 | 1.071210  |
| 5                | 6                | 0              | 4.734501                | -1.061025 | -0.085488 |
| 6                | 6                | 0              | 3.990326                | -1.716854 | -1.077446 |
| 7                | 6                | 0              | 0.523005                | -1.652586 | 0.467184  |
| 8                | 6                | 0              | -0.125404               | -2.864953 | 0.086932  |
| 9                | 6                | 0              | -1.523539               | -2.902269 | 0.088427  |
| 10               | 8                | 0              | -2.214761               | -3.999633 | -0.039636 |
| 11               | 8                | 0              | 6.080764                | -0.850767 | -0.198278 |
| 12               | 6                | 0              | -2.248390               | -1.609798 | 0.128898  |
| 13               | 6                | 0              | -3.651860               | -1.582761 | 0.343974  |
| 14               | 6                | 0              | -4.399777               | -0.407172 | 0.258032  |
| 15               | 6                | 0              | -3.749846               | 0.773117  | -0.123175 |
| 16               | 6                | 0              | -2.381105               | 0.780995  | -0.419623 |
| 17               | 6                | 0              | -1.616219               | -0.387782 | -0.275353 |
| 18               | 8                | 0              | -4.305888               | -2.742839 | 0.634232  |
| 19               | 8                | 0              | -0.303288               | -0.326362 | -0.543504 |
| 20               | 8                | 0              | -4.497160               | 1.912244  | -0.192199 |
| 21               | 8                | 0              | -0.504050               | 3.706953  | 0.504674  |
| 22               | 8                | 0              | 2.205231                | 4.361711  | 1.352973  |
| 23               | 8                | 0              | -3.011790               | 4.166075  | -0.652387 |
| 24               | 1                | 0              | -5.466595               | -0.418138 | 0.452607  |
| 25               | 1                | 0              | -1.897461               | 1.696971  | -0.729330 |
| 26               | 1                | 0              | -3.930276               | 2.699153  | -0.396894 |
| 27               | 1                | 0              | -3.630520               | -3.468397 | 0.421502  |
| 28               | 1                | 0              | 0.442732                | -3.712578 | -0.283174 |
| 29               | 1                | 0              | 0.154360                | -1.164974 | 1.369592  |
| 30               | 1                | 0              | 2.241024                | -0.388797 | 2.121282  |
| 31               | 1                | 0              | 4.688896                | -0.080704 | 1.832667  |
| 32               | 1                | 0              | 4.481652                | -2.069801 | -1.979689 |
| 33               | 1                | 0              | 2.053964                | -2.419928 | -1.667428 |
| 34               | 1                | 0              | 6.411001                | -1.218628 | -1.032059 |
| 35               | 1                | 0              | 0.420482                | 1.172194  | -0.983565 |
| 36               | 1                | 0              | -0.782788               | 3.135475  | 1.236060  |
| 37               | 1                | 0              | -2.107507               | 4.060359  | -0.273007 |
| 38               | 1                | 0              | -2.880969               | 4.309751  | -1.600675 |

|    |   |   |           |          |           |
|----|---|---|-----------|----------|-----------|
| 39 | 1 | 0 | 1.262170  | 4.251502 | 1.123213  |
| 40 | 1 | 0 | 2.664632  | 3.667634 | 0.841087  |
| 41 | 8 | 0 | 3.381394  | 2.308632 | -0.255820 |
| 42 | 1 | 0 | 3.637540  | 1.450669 | 0.125792  |
| 43 | 1 | 0 | 4.077959  | 2.534558 | -0.889140 |
| 44 | 8 | 0 | 0.754561  | 2.072821 | -1.227713 |
| 45 | 1 | 0 | -0.060725 | 3.094482 | -0.147046 |
| 46 | 1 | 0 | 1.693692  | 2.101862 | -0.948919 |

### INT2-5wb

| Center<br>Number | Atomic<br>Number | Atomic<br>Type | Coordinates (Angstroms) |           |           |
|------------------|------------------|----------------|-------------------------|-----------|-----------|
|                  |                  |                | X                       | Y         | Z         |
| 1                | 6                | 0              | 2.300498                | -1.653983 | -1.037548 |
| 2                | 6                | 0              | 1.842149                | -1.368067 | 0.256961  |
| 3                | 6                | 0              | 2.781335                | -1.025723 | 1.236030  |
| 4                | 6                | 0              | 4.148051                | -0.974741 | 0.941332  |
| 5                | 6                | 0              | 4.585170                | -1.258492 | -0.358197 |
| 6                | 6                | 0              | 3.657214                | -1.594448 | -1.354066 |
| 7                | 6                | 0              | 0.371289                | -1.417275 | 0.588139  |
| 8                | 6                | 0              | -0.281738               | -2.760060 | 0.395857  |
| 9                | 6                | 0              | -1.645789               | -2.826297 | 0.288631  |
| 10               | 8                | 0              | -2.376067               | -3.932554 | 0.264586  |
| 11               | 8                | 0              | 5.933266                | -1.185100 | -0.600385 |
| 12               | 6                | 0              | -2.366733               | -1.535431 | 0.151434  |
| 13               | 6                | 0              | -3.777202               | -1.452414 | 0.187094  |
| 14               | 6                | 0              | -4.442869               | -0.237165 | -0.010786 |
| 15               | 6                | 0              | -3.693243               | 0.913040  | -0.285144 |
| 16               | 6                | 0              | -2.293251               | 0.859186  | -0.370191 |
| 17               | 6                | 0              | -1.657257               | -0.358234 | -0.140220 |
| 18               | 8                | 0              | -4.498376               | -2.586444 | 0.404025  |
| 19               | 8                | 0              | -0.288325               | -0.402054 | -0.265877 |
| 20               | 8                | 0              | -4.367329               | 2.088150  | -0.460266 |
| 21               | 8                | 0              | -0.268071               | 3.689020  | 0.583260  |
| 22               | 8                | 0              | 2.448854                | 4.188230  | 1.558348  |
| 23               | 8                | 0              | -2.708278               | 4.263699  | -0.681097 |
| 24               | 1                | 0              | -5.525563               | -0.191524 | 0.037915  |
| 25               | 1                | 0              | -1.718140               | 1.744931  | -0.597992 |
| 26               | 1                | 0              | -3.736315               | 2.843749  | -0.570310 |
| 27               | 1                | 0              | -3.787427               | -3.330478 | 0.384971  |
| 28               | 1                | 0              | 0.327482                | -3.655235 | 0.476065  |
| 29               | 1                | 0              | 0.233930                | -1.039960 | 1.614726  |
| 30               | 1                | 0              | 2.448162                | -0.790633 | 2.243110  |
| 31               | 1                | 0              | 4.875167                | -0.719426 | 1.705684  |
| 32               | 1                | 0              | 3.996781                | -1.810194 | -2.363142 |
| 33               | 1                | 0              | 1.585588                | -1.919086 | -1.810685 |
| 34               | 1                | 0              | 6.119534                | -1.380591 | -1.530958 |
| 35               | 1                | 0              | 0.635920                | 1.081265  | -0.800272 |
| 36               | 1                | 0              | -0.593724               | 3.145962  | 1.317013  |
| 37               | 1                | 0              | -1.830698               | 4.110567  | -0.258945 |
| 38               | 1                | 0              | -2.518831               | 4.468667  | -1.607970 |
| 39               | 1                | 0              | 1.514493                | 4.135540  | 1.280122  |
| 40               | 1                | 0              | 2.894165                | 3.475290  | 1.060402  |
| 41               | 8                | 0              | 3.592052                | 2.100876  | -0.032212 |
| 42               | 1                | 0              | 3.812923                | 1.215076  | 0.306322  |
| 43               | 1                | 0              | 4.294876                | 2.325372  | -0.659172 |
| 44               | 8                | 0              | 0.995268                | 1.953957  | -1.065665 |
| 45               | 1                | 0              | 0.173237                | 3.047318  | -0.037643 |
| 46               | 1                | 0              | 1.928738                | 1.961760  | -0.762940 |

### INT1-5wc

| Center<br>Number | Atomic<br>Number | Atomic<br>Type | Coordinates (Angstroms) |           |           |
|------------------|------------------|----------------|-------------------------|-----------|-----------|
|                  |                  |                | X                       | Y         | Z         |
| 1                | 6                | 0              | -1.319597               | -3.326384 | 0.291683  |
| 2                | 6                | 0              | -0.427329               | -2.326996 | -0.243638 |
| 3                | 6                | 0              | -0.950553               | -0.974615 | -0.404632 |
| 4                | 6                | 0              | -2.242441               | -0.697846 | 0.115603  |
| 5                | 6                | 0              | -3.029399               | -1.685165 | 0.700746  |
| 6                | 6                | 0              | -2.580223               | -3.015619 | 0.784950  |

|    |   |   |           |           |           |
|----|---|---|-----------|-----------|-----------|
| 7  | 6 | 0 | 0.915285  | -2.741367 | -0.612067 |
| 8  | 8 | 0 | 1.180797  | -3.973605 | -0.813945 |
| 9  | 8 | 0 | -0.296400 | -0.043943 | -1.029805 |
| 10 | 8 | 0 | -4.269107 | -1.412302 | 1.186554  |
| 11 | 8 | 0 | -0.933549 | -4.625870 | 0.358675  |
| 12 | 6 | 0 | 2.083038  | -1.844664 | -0.692580 |
| 13 | 6 | 0 | 2.270706  | -0.757379 | 0.083412  |
| 14 | 6 | 0 | 3.463403  | 0.084387  | 0.158390  |
| 15 | 6 | 0 | 3.452042  | 1.204932  | 1.015196  |
| 16 | 6 | 0 | 4.547787  | 2.057036  | 1.120829  |
| 17 | 6 | 0 | 5.696019  | 1.801931  | 0.362502  |
| 18 | 6 | 0 | 5.737280  | 0.691125  | -0.495053 |
| 19 | 6 | 0 | 4.634981  | -0.151580 | -0.590985 |
| 20 | 8 | 0 | 6.746106  | 2.667388  | 0.498842  |
| 21 | 8 | 0 | -1.485416 | 2.165007  | -1.141130 |
| 22 | 8 | 0 | -4.871471 | 1.210664  | 0.795050  |
| 23 | 8 | 0 | -2.696740 | 3.046475  | 1.096162  |
| 24 | 8 | 0 | -4.337162 | 4.697937  | -0.412289 |
| 25 | 8 | 0 | -4.237739 | 2.199896  | -1.750840 |
| 26 | 1 | 0 | -3.211356 | -3.792281 | 1.201308  |
| 27 | 1 | 0 | -2.631486 | 0.304794  | 0.015629  |
| 28 | 1 | 0 | -4.490352 | -0.453479 | 1.050439  |
| 29 | 1 | 0 | -0.054915 | -4.666193 | -0.125769 |
| 30 | 1 | 0 | 2.877666  | -2.230008 | -1.327100 |
| 31 | 1 | 0 | 1.452571  | -0.449113 | 0.728149  |
| 32 | 1 | 0 | 2.563805  | 1.411762  | 1.606219  |
| 33 | 1 | 0 | 4.526826  | 2.917848  | 1.781272  |
| 34 | 1 | 0 | 6.630021  | 0.491026  | -1.081452 |
| 35 | 1 | 0 | 4.692216  | -1.004848 | -1.258997 |
| 36 | 1 | 0 | 7.483160  | 2.401682  | -0.069947 |
| 37 | 1 | 0 | -0.971113 | 1.246383  | -1.107150 |
| 38 | 1 | 0 | -2.123210 | 3.274584  | 1.838932  |
| 39 | 1 | 0 | -4.189187 | 1.786619  | 1.192559  |
| 40 | 1 | 0 | -4.803024 | 1.436438  | -0.161349 |
| 41 | 1 | 0 | -3.260480 | 2.112304  | -1.699456 |
| 42 | 1 | 0 | -4.402013 | 3.127336  | -1.481634 |
| 43 | 1 | 0 | -2.112237 | 2.734540  | 0.354021  |
| 44 | 1 | 0 | -0.929292 | 2.796062  | -1.616692 |
| 45 | 1 | 0 | -5.170913 | 4.921105  | 0.022165  |
| 46 | 1 | 0 | -3.777227 | 4.273476  | 0.274526  |

### TS2-5wc

| Center Number | Atomic Number | Atomic Type | Coordinates (Angstroms) |           |           |
|---------------|---------------|-------------|-------------------------|-----------|-----------|
|               |               |             | X                       | Y         | Z         |
| 1             | 6             | 0           | 3.031318                | 0.126537  | 1.166690  |
| 2             | 6             | 0           | 2.628167                | -0.903562 | 0.297688  |
| 3             | 6             | 0           | 3.480135                | -1.243422 | -0.766441 |
| 4             | 6             | 0           | 4.699467                | -0.594882 | -0.949249 |
| 5             | 6             | 0           | 5.085073                | 0.422495  | -0.064235 |
| 6             | 6             | 0           | 4.246943                | 0.784625  | 0.998092  |
| 7             | 6             | 0           | 1.310363                | -1.544505 | 0.481981  |
| 8             | 6             | 0           | 1.065079                | -2.894216 | 0.090622  |
| 9             | 6             | 0           | -0.260227               | -3.346036 | 0.044283  |
| 10            | 8             | 0           | -0.598220               | -4.589620 | -0.100580 |
| 11            | 8             | 0           | 6.265808                | 1.101356  | -0.189455 |
| 12            | 6             | 0           | -1.334999               | -2.319986 | 0.057122  |
| 13            | 6             | 0           | -1.077417               | -0.958280 | -0.294162 |
| 14            | 6             | 0           | -2.137289               | -0.052522 | -0.434953 |
| 15            | 6             | 0           | -3.456959               | -0.463853 | -0.199369 |
| 16            | 6             | 0           | -3.746825               | -1.797458 | 0.111683  |
| 17            | 6             | 0           | -2.693675               | -2.712827 | 0.202878  |
| 18            | 8             | 0           | 0.171589                | -0.507848 | -0.519028 |
| 19            | 8             | 0           | -2.987284               | -4.018867 | 0.428191  |
| 20            | 8             | 0           | -4.491893               | 0.418550  | -0.267615 |
| 21            | 8             | 0           | 0.446677                | 2.069344  | -0.112053 |
| 22            | 8             | 0           | -3.507318               | 2.950398  | -0.229745 |
| 23            | 8             | 0           | -1.242707               | 3.709929  | -1.726708 |
| 24            | 8             | 0           | -1.336027               | 3.216324  | 1.604206  |
| 25            | 1             | 0           | -4.770542               | -2.124461 | 0.256648  |
| 26            | 1             | 0           | -1.925272               | 0.975588  | -0.694818 |
| 27            | 1             | 0           | -4.145650               | 1.346187  | -0.333485 |
| 28            | 1             | 0           | -2.107165               | -4.502152 | 0.249003  |
| 29            | 1             | 0           | 1.867933                | -3.535924 | -0.256372 |

|    |   |   |           |           |           |
|----|---|---|-----------|-----------|-----------|
| 30 | 1 | 0 | 0.802532  | -1.199779 | 1.384669  |
| 31 | 1 | 0 | 2.381627  | 0.415155  | 1.988815  |
| 32 | 1 | 0 | 4.556321  | 1.575291  | 1.673879  |
| 33 | 1 | 0 | 5.346494  | -0.868659 | -1.778254 |
| 34 | 1 | 0 | 3.181738  | -2.015919 | -1.467877 |
| 35 | 1 | 0 | 6.766314  | 0.777970  | -0.952557 |
| 36 | 1 | 0 | 0.386487  | 1.077071  | -0.266460 |
| 37 | 1 | 0 | -1.254510 | 2.998161  | 2.541651  |
| 38 | 1 | 0 | -2.965317 | 3.005486  | 0.582340  |
| 39 | 1 | 0 | -2.859606 | 3.190869  | -0.929197 |
| 40 | 1 | 0 | -0.577256 | 3.102036  | -1.344553 |
| 41 | 1 | 0 | -1.137548 | 4.529570  | -1.199602 |
| 42 | 1 | 0 | -0.637082 | 2.708902  | 1.122242  |
| 43 | 1 | 0 | 1.385816  | 2.273026  | -0.005023 |
| 44 | 8 | 0 | -1.021016 | 5.658964  | 0.311886  |
| 45 | 1 | 0 | -1.767559 | 6.261707  | 0.426867  |
| 46 | 1 | 0 | -1.159554 | 4.929010  | 0.953509  |

### INT2-5wc

| Center Number | Atomic Number | Atomic Type | Coordinates (Angstroms) |           |           |
|---------------|---------------|-------------|-------------------------|-----------|-----------|
|               |               |             | X                       | Y         | Z         |
| 1             | 6             | 0           | -2.864060               | -2.624821 | 0.023236  |
| 2             | 6             | 0           | -1.485194               | -2.303944 | 0.065107  |
| 3             | 6             | 0           | -1.132169               | -0.953342 | -0.064686 |
| 4             | 6             | 0           | -2.076855               | 0.060129  | -0.199277 |
| 5             | 6             | 0           | -3.439049               | -0.285149 | -0.198786 |
| 6             | 6             | 0           | -3.838037               | -1.622964 | -0.089284 |
| 7             | 6             | 0           | -0.437631               | -3.358232 | 0.108797  |
| 8             | 8             | 0           | -0.840705               | -4.603507 | -0.049774 |
| 9             | 8             | 0           | 0.198221                | -0.598089 | -0.125191 |
| 10            | 8             | 0           | -4.407362               | 0.668412  | -0.301073 |
| 11            | 8             | 0           | -3.231693               | -3.927079 | 0.074660  |
| 12            | 6             | 0           | 0.855741                | -2.931810 | 0.277776  |
| 13            | 6             | 0           | 1.113265                | -1.497724 | 0.635500  |
| 14            | 6             | 0           | 2.502946                | -0.979989 | 0.356312  |
| 15            | 6             | 0           | 3.107140                | -0.070803 | 1.236405  |
| 16            | 6             | 0           | 4.359261                | 0.480673  | 0.962738  |
| 17            | 6             | 0           | 5.027044                | 0.122611  | -0.213841 |
| 18            | 6             | 0           | 4.440675                | -0.785205 | -1.106022 |
| 19            | 6             | 0           | 3.187625                | -1.325929 | -0.816182 |
| 20            | 8             | 0           | 6.253969                | 0.691054  | -0.438402 |
| 21            | 8             | 0           | 0.644245                | 2.086439  | 0.018851  |
| 22            | 8             | 0           | -3.277860               | 3.140969  | -0.230072 |
| 23            | 8             | 0           | -1.120741               | 3.456224  | 1.627995  |
| 24            | 8             | 0           | -0.644015               | 5.766203  | 0.147317  |
| 25            | 8             | 0           | -0.970854               | 3.700836  | -1.742730 |
| 26            | 1             | 0           | -4.890621               | -1.884605 | -0.107576 |
| 27            | 1             | 0           | -1.767405               | 1.091395  | -0.292069 |
| 28            | 1             | 0           | -4.000116               | 1.572910  | -0.309457 |
| 29            | 1             | 0           | -2.319302               | -4.430848 | 0.026617  |
| 30            | 1             | 0           | 1.684655                | -3.632049 | 0.295410  |
| 31            | 1             | 0           | 0.866836                | -1.279731 | 1.689760  |
| 32            | 1             | 0           | 2.590735                | 0.213930  | 2.149757  |
| 33            | 1             | 0           | 4.825581                | 1.181897  | 1.647354  |
| 34            | 1             | 0           | 4.960977                | -1.063739 | -2.018850 |
| 35            | 1             | 0           | 2.732397                | -2.025737 | -1.510317 |
| 36            | 1             | 0           | 6.623114                | 0.377302  | -1.276363 |
| 37            | 1             | 0           | 0.556723                | 1.103370  | -0.029043 |
| 38            | 1             | 0           | -1.065732               | 3.317648  | 2.582511  |
| 39            | 1             | 0           | -2.760352               | 3.238990  | 0.592918  |
| 40            | 1             | 0           | -2.604570               | 3.311548  | -0.926559 |
| 41            | 1             | 0           | -0.336636               | 3.080554  | -1.333393 |
| 42            | 1             | 0           | -0.815682               | 4.543291  | -1.264900 |
| 43            | 1             | 0           | -0.434580               | 2.884370  | 1.210581  |
| 44            | 1             | 0           | 1.590033                | 2.267603  | 0.110091  |
| 45            | 1             | 0           | -1.342623               | 6.431919  | 0.197560  |
| 46            | 1             | 0           | -0.843277               | 5.107283  | 0.846557  |

### INT1-5wd

| Center<br>Number | Atomic<br>Number | Atomic<br>Type | Coordinates (Angstroms) |           |           |
|------------------|------------------|----------------|-------------------------|-----------|-----------|
|                  |                  |                | X                       | Y         | Z         |
| 1                | 6                | 0              | 2.485070                | -0.413117 | 1.433647  |
| 2                | 6                | 0              | 2.034219                | -1.344342 | 0.475498  |
| 3                | 6                | 0              | 2.998484                | -1.942533 | -0.362050 |
| 4                | 6                | 0              | 4.347603                | -1.607864 | -0.264620 |
| 5                | 6                | 0              | 4.758459                | -0.660475 | 0.682083  |
| 6                | 6                | 0              | 3.829805                | -0.074339 | 1.545869  |
| 7                | 6                | 0              | 0.596496                | -1.580817 | 0.348746  |
| 8                | 6                | 0              | -0.031923               | -2.497641 | -0.410897 |
| 9                | 6                | 0              | -1.505429               | -2.641400 | -0.421062 |
| 10               | 8                | 0              | -1.950644               | -3.835010 | -0.402297 |
| 11               | 8                | 0              | 6.058318                | -0.216044 | 0.770734  |
| 12               | 6                | 0              | -2.389737               | -1.500891 | -0.338861 |
| 13               | 6                | 0              | -2.015274               | -0.154489 | -0.771620 |
| 14               | 6                | 0              | -2.867960               | 0.917390  | -0.383546 |
| 15               | 6                | 0              | -4.066432               | 0.689163  | 0.285424  |
| 16               | 6                | 0              | -4.512191               | -0.618305 | 0.573111  |
| 17               | 6                | 0              | -3.693437               | -1.687986 | 0.240107  |
| 18               | 8                | 0              | -0.978114               | 0.068106  | -1.503026 |
| 19               | 8                | 0              | -4.139736               | -2.939557 | 0.525659  |
| 20               | 8                | 0              | -4.879724               | 1.712118  | 0.663828  |
| 21               | 8                | 0              | -3.621620               | 4.114365  | 0.424849  |
| 22               | 8                | 0              | -0.910831               | 3.912448  | 0.623804  |
| 23               | 8                | 0              | 0.201400                | 2.392444  | -1.256570 |
| 24               | 8                | 0              | 2.906006                | 1.533889  | -1.493980 |
| 25               | 8                | 0              | 5.281403                | 2.400299  | -0.250165 |
| 26               | 1                | 0              | -5.470863               | -0.785236 | 1.050740  |
| 27               | 1                | 0              | -2.583656               | 1.923565  | -0.666922 |
| 28               | 1                | 0              | -4.431784               | 2.582991  | 0.514679  |
| 29               | 1                | 0              | -3.437354               | -3.561871 | 0.180161  |
| 30               | 1                | 0              | 0.511105                | -3.261667 | -0.962345 |
| 31               | 1                | 0              | -0.025542               | -0.896714 | 0.922031  |
| 32               | 1                | 0              | 1.763050                | 0.068387  | 2.086985  |
| 33               | 1                | 0              | 4.164521                | 0.660284  | 2.270535  |
| 34               | 1                | 0              | 5.072277                | -2.057238 | -0.937607 |
| 35               | 1                | 0              | 2.693226                | -2.655709 | -1.120695 |
| 36               | 1                | 0              | 6.637016                | -0.720397 | 0.179472  |
| 37               | 1                | 0              | -0.270794               | 1.506355  | -1.364203 |
| 38               | 1                | 0              | -0.655228               | 3.566718  | 1.489029  |
| 39               | 1                | 0              | -2.633288               | 4.050872  | 0.476645  |
| 40               | 1                | 0              | -3.818443               | 4.652826  | -0.352810 |
| 41               | 1                | 0              | 5.782211                | 1.637558  | 0.091348  |
| 42               | 1                | 0              | 5.888255                | 2.877880  | -0.831496 |
| 43               | 1                | 0              | 2.864773                | 0.591551  | -1.276601 |
| 44               | 1                | 0              | 3.716766                | 1.863494  | -1.049441 |
| 45               | 1                | 0              | -0.463113               | 3.325157  | -0.050871 |
| 46               | 1                | 0              | 1.158680                | 2.192607  | -1.262279 |

### TS2-5wd

| Center<br>Number | Atomic<br>Number | Atomic<br>Type | Coordinates (Angstroms) |           |           |
|------------------|------------------|----------------|-------------------------|-----------|-----------|
|                  |                  |                | X                       | Y         | Z         |
| 1                | 6                | 0              | -1.787320               | -0.220606 | -0.021520 |
| 2                | 6                | 0              | -2.458995               | -1.487027 | 0.080253  |
| 3                | 6                | 0              | -3.878593               | -1.471965 | 0.192881  |
| 4                | 6                | 0              | -4.607094               | -0.284561 | 0.272764  |
| 5                | 6                | 0              | -3.925330               | 0.934710  | 0.167481  |
| 6                | 6                | 0              | -2.533624               | 0.971973  | 0.005947  |
| 7                | 6                | 0              | -1.762737               | -2.764124 | -0.209196 |
| 8                | 8                | 0              | -2.467172               | -3.789910 | -0.571138 |
| 9                | 8                | 0              | -4.559196               | -2.647111 | 0.194695  |
| 10               | 8                | 0              | -4.668231               | 2.072555  | 0.236473  |
| 11               | 8                | 0              | -0.461332               | -0.126050 | -0.163966 |
| 12               | 6                | 0              | -0.358890               | -2.757220 | -0.187607 |
| 13               | 6                | 0              | 0.304182                | -1.687468 | 0.470099  |
| 14               | 6                | 0              | 1.759295                | -1.484427 | 0.302606  |
| 15               | 6                | 0              | 2.372701                | -1.633958 | -0.951801 |
| 16               | 6                | 0              | 3.738872                | -1.415655 | -1.116994 |
| 17               | 6                | 0              | 4.514464                | -1.050676 | -0.011553 |
| 18               | 6                | 0              | 3.931225                | -0.906255 | 1.251087  |
| 19               | 6                | 0              | 2.558044                | -1.109378 | 1.395793  |
| 20               | 8                | 0              | 5.861250                | -0.772737 | -0.118513 |

|    |   |   |           |           |           |
|----|---|---|-----------|-----------|-----------|
| 21 | 8 | 0 | 0.781222  | 2.200473  | -0.856449 |
| 22 | 8 | 0 | -0.631920 | 4.319928  | -0.032043 |
| 23 | 8 | 0 | -3.319505 | 4.348354  | -0.308238 |
| 24 | 8 | 0 | 3.091098  | 2.291240  | 0.693322  |
| 25 | 8 | 0 | 5.736966  | 2.114602  | -0.173529 |
| 26 | 1 | 0 | -5.687655 | -0.308966 | 0.360021  |
| 27 | 1 | 0 | -2.012799 | 1.919883  | -0.057126 |
| 28 | 1 | 0 | -4.120308 | 2.875421  | 0.042620  |
| 29 | 1 | 0 | -3.868345 | -3.329331 | -0.118637 |
| 30 | 1 | 0 | 0.195291  | -3.500369 | -0.751703 |
| 31 | 1 | 0 | -0.050691 | -1.422317 | 1.466738  |
| 32 | 1 | 0 | 2.102682  | -0.983653 | 2.374415  |
| 33 | 1 | 0 | 4.551933  | -0.629597 | 2.097312  |
| 34 | 1 | 0 | 4.197102  | -1.511393 | -2.097447 |
| 35 | 1 | 0 | 1.767882  | -1.901721 | -1.812195 |
| 36 | 1 | 0 | 6.203639  | -1.076667 | -0.972823 |
| 37 | 1 | 0 | 0.346818  | 1.347616  | -0.607401 |
| 38 | 1 | 0 | -0.352935 | 4.494545  | 0.876356  |
| 39 | 1 | 0 | -2.331179 | 4.337787  | -0.228295 |
| 40 | 1 | 0 | -3.516552 | 4.705278  | -1.184259 |
| 41 | 1 | 0 | 5.955579  | 1.163665  | -0.174738 |
| 42 | 1 | 0 | 5.952710  | 2.435841  | -1.059406 |
| 43 | 1 | 0 | 3.034095  | 1.463739  | 1.193105  |
| 44 | 1 | 0 | 4.001204  | 2.288799  | 0.321137  |
| 45 | 1 | 0 | -0.112756 | 3.521991  | -0.331953 |
| 46 | 1 | 0 | 1.641652  | 2.218520  | -0.382054 |

### INT2-5wd

| Center<br>Number | Atomic<br>Number | Atomic<br>Type | Coordinates (Angstroms) |           |           |
|------------------|------------------|----------------|-------------------------|-----------|-----------|
|                  |                  |                | X                       | Y         | Z         |
| 1                | 6                | 0              | 2.636469                | -1.293154 | 1.297157  |
| 2                | 6                | 0              | 1.668197                | -1.289896 | 0.286283  |
| 3                | 6                | 0              | 2.089986                | -1.210717 | -1.047484 |
| 4                | 6                | 0              | 3.442645                | -1.109102 | -1.370066 |
| 5                | 6                | 0              | 4.393854                | -1.107799 | -0.344724 |
| 6                | 6                | 0              | 3.999400                | -1.213429 | 0.990553  |
| 7                | 6                | 0              | 0.197890                | -1.389340 | 0.618002  |
| 8                | 6                | 0              | -0.431355               | -2.686275 | 0.191394  |
| 9                | 6                | 0              | -1.791804               | -2.752117 | 0.032313  |
| 10               | 8                | 0              | -2.503846               | -3.838872 | -0.192540 |
| 11               | 8                | 0              | 5.744720                | -0.950468 | -0.594041 |
| 12               | 6                | 0              | -2.527184               | -1.461670 | 0.078319  |
| 13               | 6                | 0              | -1.834103               | -0.242126 | 0.019612  |
| 14               | 6                | 0              | -2.487460               | 0.988354  | -0.049183 |
| 15               | 6                | 0              | -3.893887               | 1.000402  | -0.058586 |
| 16               | 6                | 0              | -4.623598               | -0.193743 | -0.009270 |
| 17               | 6                | 0              | -3.941970               | -1.415624 | 0.041362  |
| 18               | 8                | 0              | -0.458675               | -0.237674 | -0.035534 |
| 19               | 8                | 0              | -4.633962               | -2.579733 | 0.027632  |
| 20               | 8                | 0              | -4.598849               | 2.164950  | -0.106143 |
| 21               | 8                | 0              | -3.099112               | 4.389395  | -0.416825 |
| 22               | 8                | 0              | -0.536327               | 4.243880  | 0.438592  |
| 23               | 8                | 0              | 0.918113                | 2.197261  | -0.516046 |
| 24               | 8                | 0              | 3.265967                | 2.062675  | 0.935877  |
| 25               | 8                | 0              | 5.863353                | 1.883295  | -0.063539 |
| 26               | 1                | 0              | -5.707850               | -0.173609 | -0.035604 |
| 27               | 1                | 0              | -1.919158               | 1.909712  | -0.077987 |
| 28               | 1                | 0              | -4.000967               | 2.947455  | -0.215598 |
| 29               | 1                | 0              | -3.883027               | -3.298038 | -0.070169 |
| 30               | 1                | 0              | 0.191674                | -3.573465 | 0.139266  |
| 31               | 1                | 0              | 0.070532                | -1.197923 | 1.698498  |
| 32               | 1                | 0              | 2.329432                | -1.358272 | 2.337691  |
| 33               | 1                | 0              | 4.752159                | -1.215205 | 1.772226  |
| 34               | 1                | 0              | 3.755513                | -1.019350 | -2.406776 |
| 35               | 1                | 0              | 1.347638                | -1.208739 | -1.839116 |
| 36               | 1                | 0              | 5.933149                | -1.084363 | -1.535113 |
| 37               | 1                | 0              | 0.491837                | 1.331336  | -0.357004 |
| 38               | 1                | 0              | -0.461760               | 4.230554  | 1.401830  |
| 39               | 1                | 0              | -2.153343               | 4.349473  | -0.122974 |
| 40               | 1                | 0              | -3.088787               | 4.730806  | -1.320677 |
| 41               | 1                | 0              | 6.011793                | 0.942746  | -0.277721 |
| 42               | 1                | 0              | 6.098005                | 2.376696  | -0.860946 |
| 43               | 1                | 0              | 3.197800                | 1.182241  | 1.334794  |



|    |   |   |          |          |           |
|----|---|---|----------|----------|-----------|
| 44 | 1 | 0 | 4.158280 | 2.072826 | 0.522534  |
| 45 | 1 | 0 | 0.009308 | 3.480108 | 0.107503  |
| 46 | 1 | 0 | 1.794226 | 2.154763 | -0.068196 |

### INT1-5we

| Center<br>Number | Atomic<br>Number | Atomic<br>Type | Coordinates (Angstroms) |           |           |
|------------------|------------------|----------------|-------------------------|-----------|-----------|
|                  |                  |                | X                       | Y         | Z         |
| 1                | 6                | 0              | -2.441139               | 0.337742  | -0.901869 |
| 2                | 6                | 0              | -3.027805               | -0.864494 | -0.307947 |
| 3                | 6                | 0              | -4.351337               | -0.769032 | 0.247948  |
| 4                | 6                | 0              | -5.008326               | 0.446333  | 0.392755  |
| 5                | 6                | 0              | -4.372663               | 1.608243  | -0.076211 |
| 6                | 6                | 0              | -3.138472               | 1.568817  | -0.709597 |
| 7                | 6                | 0              | -2.355845               | -2.150800 | -0.242496 |
| 8                | 8                | 0              | -3.019854               | -3.228948 | -0.094622 |
| 9                | 8                | 0              | -4.995284               | -1.879409 | 0.688683  |
| 10               | 8                | 0              | -5.060758               | 2.781707  | 0.099656  |
| 11               | 8                | 0              | -1.360168               | 0.310624  | -1.601635 |
| 12               | 6                | 0              | -0.889502               | -2.305988 | -0.241084 |
| 13               | 6                | 0              | -0.044930               | -1.408146 | 0.304088  |
| 14               | 6                | 0              | 1.410990                | -1.486134 | 0.394337  |
| 15               | 6                | 0              | 2.172423                | -2.561598 | -0.107637 |
| 16               | 6                | 0              | 3.563468                | -2.534149 | -0.077972 |
| 17               | 6                | 0              | 4.220167                | -1.420407 | 0.461737  |
| 18               | 6                | 0              | 3.492646                | -0.355675 | 0.995935  |
| 19               | 6                | 0              | 2.102764                | -0.395105 | 0.957813  |
| 20               | 8                | 0              | 5.593395                | -1.293844 | 0.449539  |
| 21               | 8                | 0              | 0.329899                | 2.222740  | -0.983248 |
| 22               | 8                | 0              | 0.186877                | 2.468039  | 1.678862  |
| 23               | 8                | 0              | 3.227655                | 2.271117  | -1.149136 |
| 24               | 8                | 0              | 5.668596                | 0.963790  | -1.336901 |
| 25               | 8                | 0              | 2.970323                | 3.040735  | 1.613055  |
| 26               | 1                | 0              | -5.993469               | 0.490825  | 0.841861  |
| 27               | 1                | 0              | -2.695867               | 2.471935  | -1.121064 |
| 28               | 1                | 0              | -4.549169               | 3.520736  | -0.260121 |
| 29               | 1                | 0              | -4.405169               | -2.648542 | 0.433507  |
| 30               | 1                | 0              | -0.543484               | -3.269619 | -0.607553 |
| 31               | 1                | 0              | -0.471119               | -0.488914 | 0.696822  |
| 32               | 1                | 0              | 1.540664                | 0.445002  | 1.352363  |
| 33               | 1                | 0              | 4.008628                | 0.504600  | 1.408598  |
| 34               | 1                | 0              | 4.136993                | -3.360901 | -0.487822 |
| 35               | 1                | 0              | 1.679285                | -3.423841 | -0.544567 |
| 36               | 1                | 0              | 6.012351                | -2.103033 | 0.120082  |
| 37               | 1                | 0              | -0.278098               | 1.478732  | -1.280632 |
| 38               | 1                | 0              | 0.145216                | 2.400819  | 0.685152  |
| 39               | 1                | 0              | -0.422358               | 3.174599  | 1.928526  |
| 40               | 1                | 0              | 1.253631                | 1.961382  | -1.144705 |
| 41               | 1                | 0              | 4.047491                | 1.730891  | -1.233512 |
| 42               | 1                | 0              | 3.374194                | 3.046124  | -1.708649 |
| 43               | 1                | 0              | 5.920854                | 0.670959  | -2.222930 |
| 44               | 1                | 0              | 5.805896                | 0.193679  | -0.753585 |
| 45               | 1                | 0              | 2.014799                | 2.899048  | 1.769195  |
| 46               | 1                | 0              | 3.098658                | 2.795475  | 0.676221  |

### TS2-5we

| Center<br>Number | Atomic<br>Number | Atomic<br>Type | Coordinates (Angstroms) |           |           |
|------------------|------------------|----------------|-------------------------|-----------|-----------|
|                  |                  |                | X                       | Y         | Z         |
| 1                | 6                | 0              | 1.581119                | -2.381885 | -0.627894 |
| 2                | 6                | 0              | 1.093920                | -1.440370 | 0.294456  |
| 3                | 6                | 0              | 2.018370                | -0.621243 | 0.964513  |
| 4                | 6                | 0              | 3.386573                | -0.739218 | 0.735466  |
| 5                | 6                | 0              | 3.844768                | -1.680953 | -0.188794 |
| 6                | 6                | 0              | 2.946932                | -2.508927 | -0.872229 |
| 7                | 6                | 0              | -0.353394               | -1.255002 | 0.524648  |
| 8                | 6                | 0              | -1.263769               | -2.347304 | 0.441127  |
| 9                | 6                | 0              | -2.636177               | -2.074778 | 0.403235  |
| 10               | 8                | 0              | -3.555915               | -2.979208 | 0.537802  |
| 11               | 8                | 0              | 5.204988                | -1.720905 | -0.418547 |

|    |   |   |           |           |           |
|----|---|---|-----------|-----------|-----------|
| 12 | 6 | 0 | -3.052453 | -0.686374 | 0.073686  |
| 13 | 6 | 0 | -4.422716 | -0.321527 | 0.181597  |
| 14 | 6 | 0 | -4.898882 | 0.917803  | -0.255514 |
| 15 | 6 | 0 | -4.004926 | 1.790327  | -0.879255 |
| 16 | 6 | 0 | -2.660619 | 1.455685  | -1.065424 |
| 17 | 6 | 0 | -2.165642 | 0.229785  | -0.581978 |
| 18 | 8 | 0 | -5.309802 | -1.204592 | 0.703073  |
| 19 | 8 | 0 | -0.868411 | -0.043551 | -0.775453 |
| 20 | 8 | 0 | -4.508869 | 2.996189  | -1.299315 |
| 21 | 8 | 0 | 0.663569  | 2.176399  | -0.397548 |
| 22 | 8 | 0 | 3.485981  | 2.385874  | -0.631269 |
| 23 | 8 | 0 | 5.627775  | 0.885172  | -1.476374 |
| 24 | 8 | 0 | 0.611598  | 2.321313  | 2.300606  |
| 25 | 1 | 0 | -5.947198 | 1.172986  | -0.150735 |
| 26 | 1 | 0 | -1.975451 | 2.148381  | -1.544101 |
| 27 | 1 | 0 | -3.816585 | 3.509641  | -1.739681 |
| 28 | 1 | 0 | -4.791030 | -2.085225 | 0.727414  |
| 29 | 1 | 0 | -0.911987 | -3.366139 | 0.317924  |
| 30 | 1 | 0 | -0.564638 | -0.494849 | 1.277861  |
| 31 | 1 | 0 | 1.662580  | 0.125182  | 1.667356  |
| 32 | 1 | 0 | 4.091421  | -0.095623 | 1.250664  |
| 33 | 1 | 0 | 3.311730  | -3.230173 | -1.598229 |
| 34 | 1 | 0 | 0.884497  | -3.007815 | -1.176162 |
| 35 | 1 | 0 | 5.431446  | -2.446459 | -1.019651 |
| 36 | 1 | 0 | 0.189922  | 1.337584  | -0.618515 |
| 37 | 1 | 0 | 0.538314  | 2.322074  | 1.310122  |
| 38 | 1 | 0 | 0.136866  | 3.103954  | 2.608911  |
| 39 | 1 | 0 | 1.613347  | 2.050900  | -0.589643 |
| 40 | 1 | 0 | 4.214598  | 1.810939  | -0.968019 |
| 41 | 1 | 0 | 3.651621  | 3.262457  | -1.004409 |
| 42 | 1 | 0 | 5.746309  | 0.832803  | -2.434343 |
| 43 | 1 | 0 | 5.618196  | -0.038297 | -1.157146 |
| 44 | 8 | 0 | 3.451484  | 2.458084  | 2.242583  |
| 45 | 1 | 0 | 2.486196  | 2.436658  | 2.400500  |
| 46 | 1 | 0 | 3.532031  | 2.436698  | 1.269576  |

## INT2-5we

| Center Number | Atomic Number | Atomic Type | Coordinates (Angstroms) |           |           |
|---------------|---------------|-------------|-------------------------|-----------|-----------|
|               |               |             | X                       | Y         | Z         |
| 1             | 6             | 0           | -2.186517               | 0.269981  | -0.382059 |
| 2             | 6             | 0           | -3.133006               | -0.657788 | 0.079719  |
| 3             | 6             | 0           | -4.501526               | -0.301679 | 0.005591  |
| 4             | 6             | 0           | -4.893925               | 0.956685  | -0.470614 |
| 5             | 6             | 0           | -3.914815               | 1.851054  | -0.908418 |
| 6             | 6             | 0           | -2.552110               | 1.522886  | -0.879308 |
| 7             | 6             | 0           | -2.712179               | -2.019207 | 0.505661  |
| 8             | 8             | 0           | -3.667079               | -2.917074 | 0.656240  |
| 9             | 8             | 0           | -5.434035               | -1.205664 | 0.380504  |
| 10            | 8             | 0           | -4.349443               | 3.072645  | -1.363643 |
| 11            | 8             | 0           | -0.853801               | -0.068188 | -0.412032 |
| 12            | 6             | 0           | -1.367190               | -2.220644 | 0.670361  |
| 13            | 6             | 0           | -0.441282               | -1.040365 | 0.641086  |
| 14            | 6             | 0           | 1.008207                | -1.351846 | 0.356754  |
| 15            | 6             | 0           | 1.372160                | -2.306100 | -0.602681 |
| 16            | 6             | 0           | 2.712057                | -2.532237 | -0.920664 |
| 17            | 6             | 0           | 3.702714                | -1.791928 | -0.267922 |
| 18            | 6             | 0           | 3.364934                | -0.844120 | 0.699360  |
| 19            | 6             | 0           | 2.020776                | -0.630467 | 1.002778  |
| 20            | 8             | 0           | 5.045882                | -1.930565 | -0.566984 |
| 21            | 8             | 0           | 0.822049                | 2.197894  | -0.385369 |
| 22            | 8             | 0           | 0.877607                | 2.471463  | 2.326374  |
| 23            | 8             | 0           | 3.621274                | 2.284997  | -0.690642 |
| 24            | 8             | 0           | 5.586868                | 0.632402  | -1.653689 |
| 25            | 8             | 0           | 3.717990                | 2.362474  | 2.185681  |
| 26            | 1             | 0           | -5.944213               | 1.222474  | -0.517749 |
| 27            | 1             | 0           | -1.792311               | 2.221635  | -1.214006 |
| 28            | 1             | 0           | -3.597145               | 3.605067  | -1.658383 |
| 29            | 1             | 0           | -4.865693               | -2.070194 | 0.553563  |
| 30            | 1             | 0           | -0.971356               | -3.190036 | 0.955594  |
| 31            | 1             | 0           | -0.492135               | -0.447392 | 1.570688  |
| 32            | 1             | 0           | 1.759261                | 0.121722  | 1.740954  |
| 33            | 1             | 0           | 4.142164                | -0.270411 | 1.192775  |
| 34            | 1             | 0           | 2.983771                | -3.266780 | -1.674189 |

|    |   |   |          |           |           |
|----|---|---|----------|-----------|-----------|
| 35 | 1 | 0 | 0.597686 | -2.871572 | -1.111615 |
| 36 | 1 | 0 | 5.184388 | -2.664970 | -1.183347 |
| 37 | 1 | 0 | 0.357906 | 1.346796  | -0.513897 |
| 38 | 1 | 0 | 0.764003 | 2.438816  | 1.343283  |
| 39 | 1 | 0 | 0.485027 | 3.304932  | 2.616700  |
| 40 | 1 | 0 | 1.768916 | 2.055576  | -0.590761 |
| 41 | 1 | 0 | 4.284385 | 1.656669  | -1.067073 |
| 42 | 1 | 0 | 3.833727 | 3.148372  | -1.070956 |
| 43 | 1 | 0 | 5.641420 | 0.568954  | -2.616751 |
| 44 | 1 | 0 | 5.527373 | -0.287427 | -1.327560 |
| 45 | 1 | 0 | 2.759669 | 2.422991  | 2.372196  |
| 46 | 1 | 0 | 3.764867 | 2.326351  | 1.211151  |

### INT1-5wf

| Center<br>Number | Atomic<br>Number | Atomic<br>Type | Coordinates (Angstroms) |           |           |
|------------------|------------------|----------------|-------------------------|-----------|-----------|
|                  |                  |                | X                       | Y         | Z         |
| 1                | 6                | 0              | -2.430890               | 0.158473  | -0.877796 |
| 2                | 6                | 0              | -2.900924               | -1.122794 | -0.347012 |
| 3                | 6                | 0              | -4.169403               | -1.152321 | 0.338859  |
| 4                | 6                | 0              | -4.855706               | 0.005521  | 0.684847  |
| 5                | 6                | 0              | -4.329799               | 1.238449  | 0.250519  |
| 6                | 6                | 0              | -3.223786               | 1.300729  | -0.578657 |
| 7                | 6                | 0              | -2.146644               | -2.352263 | -0.436067 |
| 8                | 8                | 0              | -2.709097               | -3.490640 | -0.335902 |
| 9                | 8                | 0              | -4.701476               | -2.338629 | 0.735588  |
| 10               | 8                | 0              | -4.949803               | 2.389267  | 0.657741  |
| 11               | 8                | 0              | -1.369334               | 0.296751  | -1.593238 |
| 12               | 6                | 0              | -0.669011               | -2.374251 | -0.529052 |
| 13               | 6                | 0              | 0.110249                | -1.547233 | 0.192422  |
| 14               | 6                | 0              | 1.573155                | -1.536580 | 0.255139  |
| 15               | 6                | 0              | 2.387539                | -2.144335 | -0.720526 |
| 16               | 6                | 0              | 3.776255                | -2.069638 | -0.652094 |
| 17               | 6                | 0              | 4.381443                | -1.378006 | 0.403756  |
| 18               | 6                | 0              | 3.601897                | -0.773458 | 1.393087  |
| 19               | 6                | 0              | 2.212464                | -0.853611 | 1.310361  |
| 20               | 8                | 0              | 5.748499                | -1.240413 | 0.507847  |
| 21               | 8                | 0              | 6.477221                | 1.498599  | 0.336846  |
| 22               | 8                | 0              | 4.471596                | 2.806498  | -1.023333 |
| 23               | 8                | 0              | 2.092281                | 2.320995  | 0.264705  |
| 24               | 8                | 0              | -0.465864               | 2.782170  | -0.796863 |
| 25               | 8                | 0              | -2.546756               | 4.042065  | 0.649452  |
| 26               | 1                | 0              | -5.757633               | -0.044878 | 1.283871  |
| 27               | 1                | 0              | -2.912228               | 2.252432  | -0.983650 |
| 28               | 1                | 0              | -4.305887               | 3.121625  | 0.553340  |
| 29               | 1                | 0              | -4.098036               | -3.043595 | 0.364070  |
| 30               | 1                | 0              | -0.253418               | -3.206443 | -1.092663 |
| 31               | 1                | 0              | -0.383109               | -0.789319 | 0.797632  |
| 32               | 1                | 0              | 1.609012                | -0.387759 | 2.085685  |
| 33               | 1                | 0              | 4.084753                | -0.243852 | 2.207729  |
| 34               | 1                | 0              | 4.386916                | -2.529328 | -1.424156 |
| 35               | 1                | 0              | 1.933758                | -2.660381 | -1.560383 |
| 36               | 1                | 0              | 6.199418                | -1.740455 | -0.189118 |
| 37               | 1                | 0              | -0.738611               | 1.887588  | -1.134514 |
| 38               | 1                | 0              | -1.783898               | 3.621025  | 0.184385  |
| 39               | 1                | 0              | -2.429205               | 4.995507  | 0.551588  |
| 40               | 1                | 0              | 0.439016                | 2.667596  | -0.437958 |
| 41               | 1                | 0              | 2.152641                | 1.383180  | 0.498597  |
| 42               | 1                | 0              | 2.920208                | 2.510143  | -0.236299 |
| 43               | 1                | 0              | 6.653543                | 1.865873  | 1.213519  |
| 44               | 1                | 0              | 6.283063                | 0.550772  | 0.474902  |
| 45               | 1                | 0              | 4.521120                | 2.533341  | -1.948814 |
| 46               | 1                | 0              | 5.199419                | 2.331523  | -0.557218 |

### TS2-5wf

| Center<br>Number | Atomic<br>Number | Atomic<br>Type | Coordinates (Angstroms) |           |           |
|------------------|------------------|----------------|-------------------------|-----------|-----------|
|                  |                  |                | X                       | Y         | Z         |
| 1                | 6                | 0              | 1.819645                | -2.094006 | -0.843651 |
| 2                | 6                | 0              | 1.212097                | -1.567074 | 0.307518  |

|    |   |   |           |           |           |
|----|---|---|-----------|-----------|-----------|
| 3  | 6 | 0 | 2.039141  | -1.046875 | 1.317623  |
| 4  | 6 | 0 | 3.429641  | -1.067512 | 1.198201  |
| 5  | 6 | 0 | 4.008056  | -1.596249 | 0.039498  |
| 6  | 6 | 0 | 3.206000  | -2.107672 | -0.986380 |
| 7  | 6 | 0 | -0.258433 | -1.527333 | 0.453251  |
| 8  | 6 | 0 | -1.071471 | -2.607866 | 0.020126  |
| 9  | 6 | 0 | -2.463673 | -2.419140 | -0.027778 |
| 10 | 8 | 0 | -3.317878 | -3.379786 | -0.177892 |
| 11 | 8 | 0 | 5.382914  | -1.577000 | -0.043810 |
| 12 | 6 | 0 | -2.957538 | -1.021257 | -0.022619 |
| 13 | 6 | 0 | -4.349272 | -0.757321 | 0.118015  |
| 14 | 6 | 0 | -4.878760 | 0.533984  | 0.024663  |
| 15 | 6 | 0 | -4.015677 | 1.578452  | -0.326170 |
| 16 | 6 | 0 | -2.673780 | 1.336787  | -0.622769 |
| 17 | 6 | 0 | -2.107119 | 0.072737  | -0.397699 |
| 18 | 8 | 0 | -5.198926 | -1.789273 | 0.363569  |
| 19 | 8 | 0 | -0.782118 | -0.040551 | -0.540464 |
| 20 | 8 | 0 | -4.503288 | 2.857680  | -0.361516 |
| 21 | 8 | 0 | 0.014562  | 2.484365  | 0.488937  |
| 22 | 8 | 0 | 2.765050  | 2.305630  | 0.844213  |
| 23 | 8 | 0 | 6.600506  | 0.986021  | -0.159605 |
| 24 | 8 | 0 | -2.139827 | 4.286245  | 0.342059  |
| 25 | 1 | 0 | -5.931728 | 0.712755  | 0.211655  |
| 26 | 1 | 0 | -2.035354 | 2.149507  | -0.937250 |
| 27 | 1 | 0 | -3.742256 | 3.473610  | -0.273770 |
| 28 | 1 | 0 | -4.637724 | -2.617880 | 0.185971  |
| 29 | 1 | 0 | -0.634361 | -3.525339 | -0.360450 |
| 30 | 1 | 0 | -0.579539 | -0.998924 | 1.351545  |
| 31 | 1 | 0 | 1.589771  | -0.629343 | 2.214743  |
| 32 | 1 | 0 | 4.068793  | -0.689287 | 1.989874  |
| 33 | 1 | 0 | 3.661768  | -2.505883 | -1.888663 |
| 34 | 1 | 0 | 1.198689  | -2.481066 | -1.645226 |
| 35 | 1 | 0 | 5.684931  | -2.057795 | -0.829261 |
| 36 | 1 | 0 | -0.164704 | 1.585010  | 0.136411  |
| 37 | 1 | 0 | -1.339911 | 3.713602  | 0.401650  |
| 38 | 1 | 0 | -1.845098 | 5.121509  | -0.042855 |
| 39 | 1 | 0 | 0.988891  | 2.538989  | 0.590666  |
| 40 | 1 | 0 | 2.867137  | 1.348658  | 0.954847  |
| 41 | 1 | 0 | 3.422653  | 2.549158  | 0.150593  |
| 42 | 1 | 0 | 7.019193  | 1.208692  | 0.682783  |
| 43 | 1 | 0 | 6.201489  | 0.102005  | -0.038050 |
| 44 | 8 | 0 | 4.751683  | 2.848160  | -0.971374 |
| 45 | 1 | 0 | 4.550997  | 2.707565  | -1.906028 |
| 46 | 1 | 0 | 5.441794  | 2.184606  | -0.733100 |

## INT2-5wf

| Center Number | Atomic Number | Atomic Type | Coordinates (Angstroms) |           |           |
|---------------|---------------|-------------|-------------------------|-----------|-----------|
|               |               |             | X                       | Y         | Z         |
| 1             | 6             | 0           | -2.141986               | 0.027335  | -0.298212 |
| 2             | 6             | 0           | -2.986560               | -1.045453 | 0.024333  |
| 3             | 6             | 0           | -4.380071               | -0.795878 | 0.054513  |
| 4             | 6             | 0           | -4.891912               | 0.497211  | -0.136013 |
| 5             | 6             | 0           | -4.005030               | 1.537252  | -0.433669 |
| 6             | 6             | 0           | -2.633916               | 1.296323  | -0.581428 |
| 7             | 6             | 0           | -2.428104               | -2.413275 | 0.190189  |
| 8             | 8             | 0           | -3.285246               | -3.412851 | 0.180236  |
| 9             | 8             | 0           | -5.222081               | -1.833432 | 0.281085  |
| 10            | 8             | 0           | -4.490514               | 2.812061  | -0.565202 |
| 11            | 8             | 0           | -0.779438               | -0.147900 | -0.374137 |
| 12            | 6             | 0           | -1.061066               | -2.496987 | 0.298282  |
| 13            | 6             | 0           | -0.274139               | -1.231531 | 0.499748  |
| 14            | 6             | 0           | 1.203867                | -1.352018 | 0.218411  |
| 15            | 6             | 0           | 1.667578                | -1.599812 | -1.080136 |
| 16            | 6             | 0           | 3.032608                | -1.696834 | -1.351737 |
| 17            | 6             | 0           | 3.952062                | -1.561512 | -0.306362 |
| 18            | 6             | 0           | 3.513900                | -1.326064 | 0.998572  |
| 19            | 6             | 0           | 2.142032                | -1.216863 | 1.249358  |
| 20            | 8             | 0           | 5.315756                | -1.640088 | -0.510356 |
| 21            | 8             | 0           | 6.671804                | 0.784460  | 0.006713  |
| 22            | 8             | 0           | 4.850224                | 2.774639  | -0.505367 |
| 23            | 8             | 0           | 2.737089                | 2.143121  | 1.123730  |
| 24            | 8             | 0           | 0.074393                | 2.543156  | 0.483783  |
| 25            | 8             | 0           | -2.164829               | 4.288127  | 0.240875  |

|    |   |   |           |           |           |
|----|---|---|-----------|-----------|-----------|
| 26 | 1 | 0 | -5.956450 | 0.684189  | -0.045096 |
| 27 | 1 | 0 | -1.963297 | 2.092783  | -0.866425 |
| 28 | 1 | 0 | -3.743195 | 3.435816  | -0.436450 |
| 29 | 1 | 0 | -4.590026 | -2.657161 | 0.272538  |
| 30 | 1 | 0 | -0.552096 | -3.451341 | 0.388481  |
| 31 | 1 | 0 | -0.398013 | -0.829185 | 1.521355  |
| 32 | 1 | 0 | 1.802575  | -1.025811 | 2.264250  |
| 33 | 1 | 0 | 4.240187  | -1.228608 | 1.799055  |
| 34 | 1 | 0 | 3.379663  | -1.873767 | -2.366245 |
| 35 | 1 | 0 | 0.951271  | -1.705156 | -1.888637 |
| 36 | 1 | 0 | 5.510121  | -1.894417 | -1.424809 |
| 37 | 1 | 0 | -0.112231 | 1.628492  | 0.203090  |
| 38 | 1 | 0 | -1.342419 | 3.762844  | 0.356234  |
| 39 | 1 | 0 | -1.890165 | 5.144323  | -0.111786 |
| 40 | 1 | 0 | 1.031761  | 2.544984  | 0.706780  |
| 41 | 1 | 0 | 2.771127  | 1.175131  | 1.159270  |
| 42 | 1 | 0 | 3.462442  | 2.401320  | 0.506359  |
| 43 | 1 | 0 | 7.029376  | 0.807640  | 0.904521  |
| 44 | 1 | 0 | 6.251677  | -0.092864 | -0.096078 |
| 45 | 1 | 0 | 4.677639  | 2.786812  | -1.456007 |
| 46 | 1 | 0 | 5.527221  | 2.072274  | -0.356377 |

### INT1-5wg

| Center<br>Number | Atomic<br>Number | Atomic<br>Type | Coordinates (Angstroms) |           |           |
|------------------|------------------|----------------|-------------------------|-----------|-----------|
|                  |                  |                | X                       | Y         | Z         |
| 1                | 6                | 0              | 2.128372                | -0.851591 | 1.268050  |
| 2                | 6                | 0              | 1.450330                | -1.435509 | 0.179928  |
| 3                | 6                | 0              | 2.207617                | -1.774565 | -0.959707 |
| 4                | 6                | 0              | 3.571560                | -1.510836 | -1.023256 |
| 5                | 6                | 0              | 4.217530                | -0.895816 | 0.057915  |
| 6                | 6                | 0              | 3.498827                | -0.590575 | 1.222388  |
| 7                | 6                | 0              | -0.006829               | -1.565143 | 0.223678  |
| 8                | 6                | 0              | -0.786704               | -2.352381 | -0.539778 |
| 9                | 6                | 0              | -2.261804               | -2.342778 | -0.388946 |
| 10               | 8                | 0              | -2.836436               | -3.468390 | -0.248320 |
| 11               | 8                | 0              | 5.531620                | -0.549313 | -0.105639 |
| 12               | 6                | 0              | -2.982540               | -1.094970 | -0.289076 |
| 13               | 6                | 0              | -2.496884               | 0.157975  | -0.868600 |
| 14               | 6                | 0              | -3.202098               | 1.339440  | -0.510769 |
| 15               | 6                | 0              | -4.251358               | 1.327501  | 0.391562  |
| 16               | 6                | 0              | -4.808810               | 0.121019  | 0.862065  |
| 17               | 6                | 0              | -4.200986               | -1.068237 | 0.477597  |
| 18               | 8                | 0              | -1.497607               | 0.234198  | -1.677016 |
| 19               | 8                | 0              | -4.751749               | -2.231532 | 0.916805  |
| 20               | 8                | 0              | -4.785613               | 2.506579  | 0.839169  |
| 21               | 8                | 0              | 6.543259                | 0.420245  | 2.209934  |
| 22               | 8                | 0              | -0.372808               | 2.654396  | -0.991454 |
| 23               | 8                | 0              | 2.344865                | 2.197355  | -0.291019 |
| 24               | 8                | 0              | 4.836672                | 1.848779  | -1.588336 |
| 25               | 8                | 0              | -2.261104               | 4.032839  | 0.635090  |
| 26               | 1                | 0              | -5.669224               | 0.115631  | 1.521231  |
| 27               | 1                | 0              | -2.874386               | 2.275607  | -0.939165 |
| 28               | 1                | 0              | -4.120927               | 3.208321  | 0.680726  |
| 29               | 1                | 0              | -4.198928               | -2.962036 | 0.522384  |
| 30               | 1                | 0              | -0.372544               | -3.098961 | -1.213780 |
| 31               | 1                | 0              | -0.504328               | -0.904057 | 0.932022  |
| 32               | 1                | 0              | 1.569178                | -0.579045 | 2.159361  |
| 33               | 1                | 0              | 4.003218                | -0.120185 | 2.060248  |
| 34               | 1                | 0              | 4.141738                | -1.735862 | -1.919032 |
| 35               | 1                | 0              | 1.714638                | -2.207231 | -1.824630 |
| 36               | 1                | 0              | 5.918929                | -0.208945 | 0.739755  |
| 37               | 1                | 0              | -0.718696               | 1.770009  | -1.287539 |
| 38               | 1                | 0              | -1.559760               | 3.576192  | 0.113533  |
| 39               | 1                | 0              | -2.080399               | 4.978322  | 0.558336  |
| 40               | 1                | 0              | 0.577180                | 2.528617  | -0.796978 |
| 41               | 1                | 0              | 2.332725                | 1.397141  | 0.255503  |
| 42               | 1                | 0              | 3.166862                | 2.119025  | -0.821102 |
| 43               | 1                | 0              | 6.954791                | 1.293318  | 2.136480  |
| 44               | 1                | 0              | 7.192488                | -0.138852 | 2.660219  |
| 45               | 1                | 0              | 4.819701                | 1.703504  | -2.543876 |
| 46               | 1                | 0              | 5.241626                | 1.047049  | -1.205722 |

**TS2-5wg**

| Center<br>Number | Atomic<br>Number | Atomic<br>Type | Coordinates (Angstroms) |           |           |
|------------------|------------------|----------------|-------------------------|-----------|-----------|
|                  |                  |                | X                       | Y         | Z         |
| 1                | 6                | 0              | -2.177617               | 0.062284  | -0.372955 |
| 2                | 6                | 0              | -2.993808               | -1.023721 | 0.090378  |
| 3                | 6                | 0              | -4.374838               | -0.763137 | 0.314432  |
| 4                | 6                | 0              | -4.920099               | 0.521503  | 0.214507  |
| 5                | 6                | 0              | -4.090541               | 1.557785  | -0.229204 |
| 6                | 6                | 0              | -2.768308               | 1.314592  | -0.601623 |
| 7                | 6                | 0              | -2.491288               | -2.419395 | 0.087452  |
| 8                | 8                | 0              | -3.349092               | -3.387735 | 0.017284  |
| 9                | 8                | 0              | -5.197924               | -1.792599 | 0.646670  |
| 10               | 8                | 0              | -4.590947               | 2.831824  | -0.283141 |
| 11               | 8                | 0              | -0.865211               | -0.052667 | -0.601387 |
| 12               | 6                | 0              | -1.098957               | -2.597700 | 0.049863  |
| 13               | 6                | 0              | -0.269007               | -1.497898 | 0.401883  |
| 14               | 6                | 0              | 1.189008                | -1.524720 | 0.171221  |
| 15               | 6                | 0              | 1.738389                | -2.049280 | -1.012290 |
| 16               | 6                | 0              | 3.109246                | -2.015699 | -1.247667 |
| 17               | 6                | 0              | 3.972607                | -1.455524 | -0.293187 |
| 18               | 6                | 0              | 3.446547                | -0.954344 | 0.908680  |
| 19               | 6                | 0              | 2.066367                | -0.980118 | 1.122505  |
| 20               | 8                | 0              | 5.302109                | -1.431483 | -0.580767 |
| 21               | 8                | 0              | 6.693829                | 0.544687  | 0.806903  |
| 22               | 8                | 0              | 5.206627                | 2.561331  | -0.554661 |
| 23               | 8                | 0              | 2.723333                | 2.317899  | 0.657119  |
| 24               | 8                | 0              | 0.062552                | 2.603211  | -0.137205 |
| 25               | 8                | 0              | -2.171421               | 4.321031  | 0.114062  |
| 26               | 1                | 0              | -5.960645               | 0.699571  | 0.462001  |
| 27               | 1                | 0              | -2.164015               | 2.118385  | -0.993750 |
| 28               | 1                | 0              | -3.832026               | 3.455403  | -0.296156 |
| 29               | 1                | 0              | -4.643067               | -2.622643 | 0.452053  |
| 30               | 1                | 0              | -0.676983               | -3.523321 | -0.328407 |
| 31               | 1                | 0              | -0.541535               | -0.950483 | 1.305239  |
| 32               | 1                | 0              | 1.665858                | -0.576527 | 2.049392  |
| 33               | 1                | 0              | 4.111832                | -0.551494 | 1.666528  |
| 34               | 1                | 0              | 3.527678                | -2.400987 | -2.172132 |
| 35               | 1                | 0              | 1.076738                | -2.463466 | -1.766893 |
| 36               | 1                | 0              | 5.786869                | -0.836055 | 0.029548  |
| 37               | 1                | 0              | -0.150282               | 1.654262  | -0.278591 |
| 38               | 1                | 0              | -1.350292               | 3.779912  | 0.066475  |
| 39               | 1                | 0              | -1.957703               | 5.169282  | -0.295346 |
| 40               | 1                | 0              | 1.011744                | 2.633864  | 0.104507  |
| 41               | 1                | 0              | 2.716703                | 1.355862  | 0.775886  |
| 42               | 1                | 0              | 3.560760                | 2.491179  | 0.171077  |
| 43               | 1                | 0              | 7.635803                | 0.531592  | 0.580712  |
| 44               | 1                | 0              | 6.658773                | 0.636010  | 1.770795  |
| 45               | 1                | 0              | 5.224599                | 2.338822  | -1.495194 |
| 46               | 1                | 0              | 5.762139                | 1.889095  | -0.110725 |

**INT2-5wg**

| Center<br>Number | Atomic<br>Number | Atomic<br>Type | Coordinates (Angstroms) |           |           |
|------------------|------------------|----------------|-------------------------|-----------|-----------|
|                  |                  |                | X                       | Y         | Z         |
| 1                | 6                | 0              | -2.141185               | -1.072996 | -1.122344 |
| 2                | 6                | 0              | -1.173621               | -1.333140 | -0.145852 |
| 3                | 6                | 0              | -1.605241               | -1.648956 | 1.151278  |
| 4                | 6                | 0              | -2.959934               | -1.670653 | 1.474430  |
| 5                | 6                | 0              | -3.919847               | -1.383729 | 0.492436  |
| 6                | 6                | 0              | -3.507675               | -1.104762 | -0.818191 |
| 7                | 6                | 0              | 0.295991                | -1.236950 | -0.469336 |
| 8                | 6                | 0              | 1.086334                | -2.501615 | -0.281894 |
| 9                | 6                | 0              | 2.456468                | -2.418992 | -0.224857 |
| 10               | 8                | 0              | 3.313222                | -3.419692 | -0.239396 |
| 11               | 8                | 0              | -5.233045               | -1.401395 | 0.864143  |
| 12               | 6                | 0              | 3.022446                | -1.050749 | -0.087980 |
| 13               | 6                | 0              | 2.191082                | 0.024441  | 0.261506  |
| 14               | 6                | 0              | 2.696419                | 1.291727  | 0.528870  |
| 15               | 6                | 0              | 4.062946                | 1.528678  | 0.341463  |
| 16               | 6                | 0              | 4.936878                | 0.487058  | 0.012191  |

|    |   |   |           |           |           |
|----|---|---|-----------|-----------|-----------|
| 17 | 6 | 0 | 4.414944  | -0.804334 | -0.163531 |
| 18 | 8 | 0 | 0.833164  | -0.148206 | 0.385149  |
| 19 | 8 | 0 | 5.246372  | -1.844579 | -0.416021 |
| 20 | 8 | 0 | 4.556561  | 2.801191  | 0.466382  |
| 21 | 8 | 0 | -6.741920 | 0.341155  | -0.713197 |
| 22 | 8 | 0 | -0.114001 | 2.603202  | -0.168614 |
| 23 | 8 | 0 | -2.771840 | 2.230107  | -0.899438 |
| 24 | 8 | 0 | -5.174645 | 2.404339  | 0.479060  |
| 25 | 8 | 0 | 2.178045  | 4.318214  | -0.144220 |
| 26 | 1 | 0 | 5.999022  | 0.670172  | -0.109475 |
| 27 | 1 | 0 | 2.039024  | 2.088448  | 0.840079  |
| 28 | 1 | 0 | 3.804565  | 3.428092  | 0.397074  |
| 29 | 1 | 0 | 4.612336  | -2.667167 | -0.381614 |
| 30 | 1 | 0 | 0.573719  | -3.456206 | -0.346329 |
| 31 | 1 | 0 | 0.396638  | -0.839674 | -1.495356 |
| 32 | 1 | 0 | -1.830326 | -0.839321 | -2.138066 |
| 33 | 1 | 0 | -4.244768 | -0.907756 | -1.590765 |
| 34 | 1 | 0 | -3.290853 | -1.892179 | 2.484384  |
| 35 | 1 | 0 | -0.865703 | -1.859218 | 1.917990  |
| 36 | 1 | 0 | -5.786781 | -0.937201 | 0.202676  |
| 37 | 1 | 0 | 0.083859  | 1.662108  | -0.007251 |
| 38 | 1 | 0 | 1.339164  | 3.809753  | -0.191419 |
| 39 | 1 | 0 | 1.951944  | 5.173369  | 0.243853  |
| 40 | 1 | 0 | -1.069453 | 2.628237  | -0.392116 |
| 41 | 1 | 0 | -2.733322 | 1.267430  | -1.010584 |
| 42 | 1 | 0 | -3.585900 | 2.374903  | -0.366225 |
| 43 | 1 | 0 | -7.678621 | 0.356098  | -0.466930 |
| 44 | 1 | 0 | -6.726310 | 0.340973  | -1.681724 |
| 45 | 1 | 0 | -5.103999 | 2.167666  | 1.413740  |
| 46 | 1 | 0 | -5.755562 | 1.726603  | 0.078134  |

### INT1-5wh

| Center<br>Number | Atomic<br>Number | Atomic<br>Type | Coordinates (Angstroms) |           |           |
|------------------|------------------|----------------|-------------------------|-----------|-----------|
|                  |                  |                | X                       | Y         | Z         |
| 1                | 6                | 0              | 2.354938                | -0.397255 | 1.094654  |
| 2                | 6                | 0              | 1.848723                | -1.486574 | 0.355866  |
| 3                | 6                | 0              | 2.770634                | -2.319600 | -0.309083 |
| 4                | 6                | 0              | 4.136838                | -2.052891 | -0.272821 |
| 5                | 6                | 0              | 4.603649                | -0.940728 | 0.439755  |
| 6                | 6                | 0              | 3.716954                | -0.123022 | 1.143750  |
| 7                | 6                | 0              | 0.399258                | -1.618137 | 0.249001  |
| 8                | 6                | 0              | -0.322567               | -2.549267 | -0.405971 |
| 9                | 6                | 0              | -1.796828               | -2.498267 | -0.425907 |
| 10               | 8                | 0              | -2.411764               | -3.607504 | -0.326390 |
| 11               | 8                | 0              | 5.929369                | -0.565740 | 0.446855  |
| 12               | 6                | 0              | -2.519040               | -1.236095 | -0.456384 |
| 13               | 6                | 0              | -1.988227               | -0.002666 | -1.036855 |
| 14               | 6                | 0              | -2.751993               | 1.180141  | -0.835792 |
| 15               | 6                | 0              | -3.898537               | 1.201260  | -0.057938 |
| 16               | 6                | 0              | -4.476007               | 0.011627  | 0.424425  |
| 17               | 6                | 0              | -3.813285               | -1.186176 | 0.171385  |
| 18               | 8                | 0              | -0.884665               | 0.074365  | -1.700454 |
| 19               | 8                | 0              | -4.404448               | -2.328917 | 0.610021  |
| 20               | 8                | 0              | -4.500710               | 2.390139  | 0.253287  |
| 21               | 8                | 0              | 0.087048                | 2.259598  | -0.393554 |
| 22               | 8                | 0              | 2.812599                | 2.953860  | -0.431212 |
| 23               | 8                | 0              | 5.468539                | 2.062176  | -0.710795 |
| 24               | 8                | 0              | -0.873950               | 1.183375  | 2.005095  |
| 25               | 8                | 0              | -2.115706               | 4.047166  | 0.237732  |
| 26               | 1                | 0              | -5.404670               | 0.020522  | 0.983069  |
| 27               | 1                | 0              | -2.377979               | 2.096824  | -1.270197 |
| 28               | 1                | 0              | -3.835988               | 3.101123  | 0.129765  |
| 29               | 1                | 0              | -3.818872               | -3.074568 | 0.297245  |
| 30               | 1                | 0              | 0.126178                | -3.427801 | -0.863732 |
| 31               | 1                | 0              | -0.150132               | -0.814750 | 0.731653  |
| 32               | 1                | 0              | 1.659925                | 0.255857  | 1.613808  |
| 33               | 1                | 0              | 4.097638                | 0.730946  | 1.694185  |
| 34               | 1                | 0              | 4.835010                | -2.686621 | -0.812627 |
| 35               | 1                | 0              | 2.419639                | -3.169120 | -0.886376 |
| 36               | 1                | 0              | 6.470490                | -1.197116 | -0.050238 |
| 37               | 1                | 0              | -0.143820               | 1.488334  | -0.983092 |
| 38               | 1                | 0              | -1.325198               | 3.520423  | -0.007600 |

|    |   |   |           |          |           |
|----|---|---|-----------|----------|-----------|
| 39 | 1 | 0 | -1.998617 | 4.912041 | -0.176039 |
| 40 | 1 | 0 | 1.053365  | 2.408379 | -0.447180 |
| 41 | 1 | 0 | 3.694387  | 2.531099 | -0.517671 |
| 42 | 1 | 0 | 2.927651  | 3.854741 | -0.760744 |
| 43 | 1 | 0 | 5.783887  | 2.093856 | -1.623943 |
| 44 | 1 | 0 | 5.779418  | 1.209982 | -0.353981 |
| 45 | 1 | 0 | -0.475677 | 1.590143 | 1.203519  |
| 46 | 1 | 0 | -1.754187 | 0.913451 | 1.706998  |

### TS2-5wh

| Center<br>Number | Atomic<br>Number | Atomic<br>Type | Coordinates (Angstroms) |           |           |
|------------------|------------------|----------------|-------------------------|-----------|-----------|
|                  |                  |                | X                       | Y         | Z         |
| 1                | 6                | 0              | -1.710543               | -0.186806 | -0.601680 |
| 2                | 6                | 0              | -2.530302               | -1.242165 | -0.085524 |
| 3                | 6                | 0              | -3.925081               | -0.994132 | 0.034673  |
| 4                | 6                | 0              | -4.481858               | 0.266767  | -0.208513 |
| 5                | 6                | 0              | -3.643164               | 1.280324  | -0.683978 |
| 6                | 6                | 0              | -2.298037               | 1.033157  | -0.963014 |
| 7                | 6                | 0              | -1.995911               | -2.614816 | 0.108344  |
| 8                | 8                | 0              | -2.825081               | -3.609462 | 0.079886  |
| 9                | 8                | 0              | -4.749242               | -2.006485 | 0.411696  |
| 10               | 8                | 0              | -4.159395               | 2.537582  | -0.860510 |
| 11               | 8                | 0              | -0.383356               | -0.304192 | -0.749499 |
| 12               | 6                | 0              | -0.602582               | -2.749442 | 0.211024  |
| 13               | 6                | 0              | 0.157689                | -1.577059 | 0.480094  |
| 14               | 6                | 0              | 1.628600                | -1.525716 | 0.370520  |
| 15               | 6                | 0              | 2.341809                | -2.310467 | -0.550310 |
| 16               | 6                | 0              | 3.717979                | -2.156520 | -0.712056 |
| 17               | 6                | 0              | 4.395361                | -1.200461 | 0.053296  |
| 18               | 6                | 0              | 3.712348                | -0.423271 | 0.992238  |
| 19               | 6                | 0              | 2.338263                | -0.585111 | 1.136692  |
| 20               | 8                | 0              | 5.739791                | -0.939574 | -0.104245 |
| 21               | 8                | 0              | 0.455137                | 2.206079  | 0.062797  |
| 22               | 8                | 0              | -1.132755               | 2.444369  | 2.377592  |
| 23               | 8                | 0              | 3.146313                | 2.895232  | 0.213700  |
| 24               | 8                | 0              | 5.505884                | 1.836598  | -0.847699 |
| 25               | 8                | 0              | -1.759338               | 3.994048  | -0.223240 |
| 26               | 1                | 0              | -5.536873               | 0.446067  | -0.033944 |
| 27               | 1                | 0              | -1.674122               | 1.814300  | -1.372829 |
| 28               | 1                | 0              | -3.413734               | 3.173016  | -0.840913 |
| 29               | 1                | 0              | -4.167551               | -2.837087 | 0.340527  |
| 30               | 1                | 0              | -0.129068               | -3.701018 | -0.007041 |
| 31               | 1                | 0              | -0.219678               | -0.931909 | 1.274759  |
| 32               | 1                | 0              | 1.801453                | 0.043705  | 1.841013  |
| 33               | 1                | 0              | 4.255075                | 0.313125  | 1.575132  |
| 34               | 1                | 0              | 4.256413                | -2.753942 | -1.442440 |
| 35               | 1                | 0              | 1.813638                | -3.029131 | -1.168643 |
| 36               | 1                | 0              | 6.135904                | -1.541904 | -0.751523 |
| 37               | 1                | 0              | 0.304293                | 1.291629  | -0.278072 |
| 38               | 1                | 0              | -0.912913               | 3.497869  | -0.256490 |
| 39               | 1                | 0              | -1.538574               | 4.926106  | -0.347435 |
| 40               | 1                | 0              | 1.422946                | 2.372726  | 0.071261  |
| 41               | 1                | 0              | 3.934518                | 2.455439  | -0.176152 |
| 42               | 1                | 0              | 3.270585                | 3.839519  | 0.050685  |
| 43               | 1                | 0              | 5.579063                | 1.919178  | -1.808062 |
| 44               | 1                | 0              | 5.730258                | 0.909117  | -0.644196 |
| 45               | 1                | 0              | -0.470577               | 2.262683  | 1.678329  |
| 46               | 1                | 0              | -1.772159               | 3.011249  | 1.921365  |

### INT2-5wh

| Center<br>Number | Atomic<br>Number | Atomic<br>Type | Coordinates (Angstroms) |           |           |
|------------------|------------------|----------------|-------------------------|-----------|-----------|
|                  |                  |                | X                       | Y         | Z         |
| 1                | 6                | 0              | 2.393114                | -0.652788 | 1.173503  |
| 2                | 6                | 0              | 1.571017                | -1.471156 | 0.387402  |
| 3                | 6                | 0              | 2.160898                | -2.239780 | -0.624143 |
| 4                | 6                | 0              | 3.533833                | -2.173182 | -0.869720 |
| 5                | 6                | 0              | 4.326745                | -1.323841 | -0.091308 |
| 6                | 6                | 0              | 3.765826                | -0.577344 | 0.946690  |



|    |   |   |           |           |           |
|----|---|---|-----------|-----------|-----------|
| 7  | 6 | 0 | 0.075725  | -1.401467 | 0.558300  |
| 8  | 6 | 0 | -0.696864 | -2.679067 | 0.416666  |
| 9  | 6 | 0 | -2.057258 | -2.597403 | 0.240477  |
| 10 | 8 | 0 | -2.923793 | -3.588844 | 0.275208  |
| 11 | 8 | 0 | 5.675883  | -1.141926 | -0.324943 |
| 12 | 6 | 0 | -2.597733 | -1.243083 | -0.056971 |
| 13 | 6 | 0 | -1.734354 | -0.204604 | -0.437043 |
| 14 | 6 | 0 | -2.203669 | 1.040692  | -0.837324 |
| 15 | 6 | 0 | -3.576478 | 1.300210  | -0.760027 |
| 16 | 6 | 0 | -4.482088 | 0.294026  | -0.407047 |
| 17 | 6 | 0 | -3.989067 | -0.982507 | -0.093355 |
| 18 | 8 | 0 | -0.374030 | -0.401660 | -0.453377 |
| 19 | 8 | 0 | -4.847190 | -1.992666 | 0.188240  |
| 20 | 8 | 0 | -4.049607 | 2.561200  | -1.017272 |
| 21 | 8 | 0 | 0.590921  | 2.264874  | 0.131739  |
| 22 | 8 | 0 | 3.290306  | 2.834063  | 0.313578  |
| 23 | 8 | 0 | 5.565677  | 1.692563  | -0.839278 |
| 24 | 8 | 0 | -1.073603 | 2.697031  | 2.386461  |
| 25 | 8 | 0 | -1.659684 | 4.060941  | -0.303961 |
| 26 | 1 | 0 | -5.547542 | 0.493983  | -0.370664 |
| 27 | 1 | 0 | -1.511600 | 1.804045  | -1.156879 |
| 28 | 1 | 0 | -3.299787 | 3.187360  | -0.950124 |
| 29 | 1 | 0 | -4.221963 | -2.818856 | 0.265308  |
| 30 | 1 | 0 | -0.201603 | -3.625251 | 0.609882  |
| 31 | 1 | 0 | -0.136374 | -0.900413 | 1.519416  |
| 32 | 1 | 0 | 1.951584  | -0.046442 | 1.959677  |
| 33 | 1 | 0 | 4.398695  | 0.070060  | 1.544508  |
| 34 | 1 | 0 | 3.979319  | -2.758097 | -1.669833 |
| 35 | 1 | 0 | 1.536296  | -2.880060 | -1.239520 |
| 36 | 1 | 0 | 5.981125  | -1.713691 | -1.044785 |
| 37 | 1 | 0 | 0.450104  | 1.332600  | -0.125654 |
| 38 | 1 | 0 | -0.795722 | 3.600339  | -0.309071 |
| 39 | 1 | 0 | -1.475068 | 4.992045  | -0.484307 |
| 40 | 1 | 0 | 1.563325  | 2.416487  | 0.157227  |
| 41 | 1 | 0 | 4.042725  | 2.362781  | -0.109590 |
| 42 | 1 | 0 | 3.473190  | 3.775120  | 0.192349  |
| 43 | 1 | 0 | 5.655931  | 1.863706  | -1.786297 |
| 44 | 1 | 0 | 5.739323  | 0.739052  | -0.724076 |
| 45 | 1 | 0 | -0.387622 | 2.458136  | 1.730675  |
| 46 | 1 | 0 | -1.691242 | 3.230250  | 1.864000  |

### INT1-5wi

| Center<br>Number | Atomic<br>Number | Atomic<br>Type | Coordinates (Angstroms) |           |           |
|------------------|------------------|----------------|-------------------------|-----------|-----------|
|                  |                  |                | X                       | Y         | Z         |
| 1                | 6                | 0              | 2.232270                | -0.631421 | 1.037542  |
| 2                | 6                | 0              | 1.563367                | -1.507550 | 0.157543  |
| 3                | 6                | 0              | 2.351651                | -2.318343 | -0.684527 |
| 4                | 6                | 0              | 3.741959                | -2.258341 | -0.650605 |
| 5                | 6                | 0              | 4.376102                | -1.377620 | 0.235035  |
| 6                | 6                | 0              | 3.623060                | -0.564764 | 1.085759  |
| 7                | 6                | 0              | 0.100031                | -1.508156 | 0.138971  |
| 8                | 6                | 0              | -0.716118               | -2.419972 | -0.423623 |
| 9                | 6                | 0              | -2.186753               | -2.374379 | -0.266153 |
| 10               | 8                | 0              | -2.749965               | -3.495214 | -0.045934 |
| 11               | 8                | 0              | 5.745545                | -1.257855 | 0.301695  |
| 12               | 6                | 0              | -2.933809               | -1.134948 | -0.235002 |
| 13               | 6                | 0              | -2.499020               | 0.094867  | -0.897734 |
| 14               | 6                | 0              | -3.257573               | 1.267564  | -0.629393 |
| 15               | 6                | 0              | -4.297120               | 1.283235  | 0.284547  |
| 16               | 6                | 0              | -4.799535               | 0.092744  | 0.845465  |
| 17               | 6                | 0              | -4.149307               | -1.097225 | 0.539119  |
| 18               | 8                | 0              | -1.491015               | 0.165010  | -1.697113 |
| 19               | 8                | 0              | -4.660158               | -2.242675 | 1.064116  |
| 20               | 8                | 0              | -4.868663               | 2.470356  | 0.656408  |
| 21               | 8                | 0              | 6.552952                | 1.459959  | 0.389170  |
| 22               | 8                | 0              | 4.287371                | 3.029108  | 0.543941  |
| 23               | 8                | 0              | 2.258779                | 1.988456  | -1.016165 |
| 24               | 8                | 0              | -0.490405               | 2.642958  | -1.032863 |
| 25               | 8                | 0              | -2.528794               | 4.147034  | 0.257179  |
| 26               | 1                | 0              | -5.653653               | 0.099088  | 1.512765  |
| 27               | 1                | 0              | -2.968798               | 2.180091  | -1.131403 |
| 28               | 1                | 0              | -4.217144               | 3.179854  | 0.467086  |

|    |   |   |           |           |           |
|----|---|---|-----------|-----------|-----------|
| 29 | 1 | 0 | -4.089876 | -2.981391 | 0.707302  |
| 30 | 1 | 0 | -0.332431 | -3.329205 | -0.880584 |
| 31 | 1 | 0 | -0.363183 | -0.664669 | 0.645939  |
| 32 | 1 | 0 | 1.650941  | 0.010795  | 1.693274  |
| 33 | 1 | 0 | 4.125840  | 0.117610  | 1.762679  |
| 34 | 1 | 0 | 4.332592  | -2.880015 | -1.317664 |
| 35 | 1 | 0 | 1.876013  | -2.990603 | -1.391186 |
| 36 | 1 | 0 | 6.178758  | -1.844947 | -0.335471 |
| 37 | 1 | 0 | -0.808474 | 1.747992  | -1.327656 |
| 38 | 1 | 0 | -1.760085 | 3.639652  | -0.093583 |
| 39 | 1 | 0 | -2.192054 | 4.680180  | 0.988514  |
| 40 | 1 | 0 | 0.480701  | 2.555742  | -0.952566 |
| 41 | 1 | 0 | 2.237134  | 1.056690  | -0.754163 |
| 42 | 1 | 0 | 2.974352  | 2.386120  | -0.467662 |
| 43 | 1 | 0 | 7.172158  | 1.585484  | 1.120832  |
| 44 | 1 | 0 | 6.359549  | 0.502235  | 0.363876  |
| 45 | 1 | 0 | 4.548317  | 3.931039  | 0.315395  |
| 46 | 1 | 0 | 5.108931  | 2.487014  | 0.489146  |

### TS2-5wi

| Center<br>Number | Atomic<br>Number | Atomic<br>Type | Coordinates (Angstroms) |           |           |
|------------------|------------------|----------------|-------------------------|-----------|-----------|
|                  |                  |                | X                       | Y         | Z         |
| 1                | 6                | 0              | 1.707906                | -2.525917 | -0.732367 |
| 2                | 6                | 0              | 1.159535                | -1.688347 | 0.253157  |
| 3                | 6                | 0              | 2.029922                | -0.859425 | 0.981478  |
| 4                | 6                | 0              | 3.401336                | -0.859222 | 0.744154  |
| 5                | 6                | 0              | 3.918615                | -1.690074 | -0.253165 |
| 6                | 6                | 0              | 3.078402                | -2.534805 | -0.987684 |
| 7                | 6                | 0              | -0.295623               | -1.578379 | 0.475974  |
| 8                | 6                | 0              | -1.198690               | -2.649159 | 0.235354  |
| 9                | 6                | 0              | -2.574389               | -2.364600 | 0.239659  |
| 10               | 8                | 0              | -3.502236               | -3.268275 | 0.255759  |
| 11               | 8                | 0              | 5.274639                | -1.607443 | -0.491012 |
| 12               | 6                | 0              | -2.973272               | -0.941325 | 0.105180  |
| 13               | 6                | 0              | -4.326789               | -0.555535 | 0.314022  |
| 14               | 6                | 0              | -4.768070               | 0.757710  | 0.117852  |
| 15               | 6                | 0              | -3.862929               | 1.689250  | -0.404307 |
| 16               | 6                | 0              | -2.571620               | 1.310649  | -0.773162 |
| 17               | 6                | 0              | -2.082440               | 0.035814  | -0.451539 |
| 18               | 8                | 0              | -5.224428               | -1.485837 | 0.734128  |
| 19               | 8                | 0              | -0.784971               | -0.198852 | -0.673522 |
| 20               | 8                | 0              | -4.253917               | 2.995659  | -0.533988 |
| 21               | 8                | 0              | 0.264753                | 2.317192  | 0.178122  |
| 22               | 8                | 0              | 3.009755                | 2.709283  | -0.150479 |
| 23               | 8                | 0              | 5.573702                | 1.199332  | -0.780952 |
| 24               | 8                | 0              | -1.713233               | 4.269833  | -0.251328 |
| 25               | 1                | 0              | -5.786358               | 1.038927  | 0.362493  |
| 26               | 1                | 0              | -1.899136               | 2.027962  | -1.221044 |
| 27               | 1                | 0              | -3.441974               | 3.550146  | -0.550042 |
| 28               | 1                | 0              | -4.736454               | -2.369605 | 0.614967  |
| 29               | 1                | 0              | -0.850327               | -3.638090 | -0.044072 |
| 30               | 1                | 0              | -0.539015               | -0.919754 | 1.310540  |
| 31               | 1                | 0              | 1.623743                | -0.190610 | 1.734964  |
| 32               | 1                | 0              | 4.063613                | -0.206755 | 1.302622  |
| 33               | 1                | 0              | 3.489018                | -3.176084 | -1.762784 |
| 34               | 1                | 0              | 1.055978                | -3.160034 | -1.324540 |
| 35               | 1                | 0              | 5.539837                | -2.219248 | -1.193589 |
| 36               | 1                | 0              | 0.026955                | 1.414592  | -0.125906 |
| 37               | 1                | 0              | -0.992164               | 3.622789  | -0.062528 |
| 38               | 1                | 0              | -1.637549               | 4.962745  | 0.417166  |
| 39               | 1                | 0              | 1.231202                | 2.418701  | 0.040502  |
| 40               | 1                | 0              | 3.525045                | 2.153832  | -0.757068 |
| 41               | 1                | 0              | 3.527444                | 2.656967  | 0.678875  |
| 42               | 1                | 0              | 6.279777                | 1.532671  | -1.350404 |
| 43               | 1                | 0              | 5.639247                | 0.224494  | -0.800329 |
| 44               | 8                | 0              | 4.985140                | 2.116479  | 1.764450  |
| 45               | 1                | 0              | 5.539402                | 2.790579  | 2.178862  |
| 46               | 1                | 0              | 5.456729                | 1.827000  | 0.954262  |

### INT2-5wi

| Center<br>Number | Atomic<br>Number | Atomic<br>Type | Coordinates (Angstroms) |           |           |
|------------------|------------------|----------------|-------------------------|-----------|-----------|
|                  |                  |                | X                       | Y         | Z         |
| 1                | 6                | 0              | -2.094729               | 0.030193  | -0.283080 |
| 2                | 6                | 0              | -3.031370               | -0.936111 | 0.114308  |
| 3                | 6                | 0              | -4.392778               | -0.548548 | 0.156728  |
| 4                | 6                | 0              | -4.780522               | 0.776805  | -0.096889 |
| 5                | 6                | 0              | -3.804368               | 1.706780  | -0.472007 |
| 6                | 6                | 0              | -2.467833               | 1.323291  | -0.630950 |
| 7                | 6                | 0              | -2.604668               | -2.342830 | 0.341648  |
| 8                | 8                | 0              | -3.557877               | -3.250119 | 0.403225  |
| 9                | 8                | 0              | -5.326137               | -1.484666 | 0.456688  |
| 10               | 8                | 0              | -4.165850               | 3.014021  | -0.667677 |
| 11               | 8                | 0              | -0.760250               | -0.281924 | -0.372640 |
| 12               | 6                | 0              | -1.250518               | -2.558000 | 0.427850  |
| 13               | 6                | 0              | -0.346070               | -1.367487 | 0.558479  |
| 14               | 6                | 0              | 1.118462                | -1.583723 | 0.271782  |
| 15               | 6                | 0              | 1.548125                | -2.373209 | -0.802638 |
| 16               | 6                | 0              | 2.900883                | -2.456950 | -1.138169 |
| 17               | 6                | 0              | 3.837830                | -1.740193 | -0.386690 |
| 18               | 6                | 0              | 3.436068                | -0.967949 | 0.705040  |
| 19               | 6                | 0              | 2.080212                | -0.892576 | 1.020359  |
| 20               | 8                | 0              | 5.185458                | -1.730084 | -0.694186 |
| 21               | 8                | 0              | 5.584834                | 1.074763  | -0.852245 |
| 22               | 8                | 0              | 5.121524                | 1.928003  | 1.740304  |
| 23               | 8                | 0              | 3.110366                | 2.688793  | -0.066502 |
| 24               | 8                | 0              | 0.378991                | 2.408642  | 0.329899  |
| 25               | 8                | 0              | -1.649610               | 4.326515  | -0.215205 |
| 26               | 1                | 0              | -5.819509               | 1.072088  | 0.002772  |
| 27               | 1                | 0              | -1.724275               | 2.025846  | -0.974077 |
| 28               | 1                | 0              | -3.354724               | 3.565443  | -0.608858 |
| 29               | 1                | 0              | -4.776118               | -2.366395 | 0.480256  |
| 30               | 1                | 0              | -0.839776               | -3.553416 | 0.564032  |
| 31               | 1                | 0              | -0.433682               | -0.895934 | 1.553858  |
| 32               | 1                | 0              | 1.765153                | -0.269202 | 1.852962  |
| 33               | 1                | 0              | 4.172909                | -0.415842 | 1.278314  |
| 34               | 1                | 0              | 3.222047                | -3.058914 | -1.983938 |
| 35               | 1                | 0              | 0.814891                | -2.914289 | -1.392909 |
| 36               | 1                | 0              | 5.370633                | -2.305141 | -1.451231 |
| 37               | 1                | 0              | 0.150022                | 1.486824  | 0.115033  |
| 38               | 1                | 0              | -0.914334               | 3.716751  | 0.022247  |
| 39               | 1                | 0              | -1.634399               | 5.036251  | 0.439757  |
| 40               | 1                | 0              | 1.346543                | 2.493416  | 0.174140  |
| 41               | 1                | 0              | 3.564438                | 2.130141  | -0.717378 |
| 42               | 1                | 0              | 3.659139                | 2.572284  | 0.736648  |
| 43               | 1                | 0              | 6.289292                | 1.407611  | -1.424014 |
| 44               | 1                | 0              | 5.611060                | 0.099952  | -0.920200 |
| 45               | 1                | 0              | 5.723858                | 2.568192  | 2.141271  |
| 46               | 1                | 0              | 5.542896                | 1.635822  | 0.903409  |

### INT1-5wj

| Center<br>Number | Atomic<br>Number | Atomic<br>Type | Coordinates (Angstroms) |           |           |
|------------------|------------------|----------------|-------------------------|-----------|-----------|
|                  |                  |                | X                       | Y         | Z         |
| 1                | 6                | 0              | -2.904010               | -2.348358 | 0.237877  |
| 2                | 6                | 0              | -1.693073               | -1.869468 | -0.373477 |
| 3                | 6                | 0              | -1.644977               | -0.473774 | -0.796758 |
| 4                | 6                | 0              | -2.717032               | 0.369893  | -0.394097 |
| 5                | 6                | 0              | -3.807040               | -0.121937 | 0.317923  |
| 6                | 6                | 0              | -3.933509               | -1.492479 | 0.610551  |
| 7                | 6                | 0              | -0.582181               | -2.792910 | -0.504837 |
| 8                | 8                | 0              | -0.771773               | -4.052613 | -0.503110 |
| 9                | 8                | 0              | -0.690766               | -0.002986 | -1.531100 |
| 10               | 8                | 0              | -4.813481               | 0.699388  | 0.732912  |
| 11               | 8                | 0              | -3.053206               | -3.667766 | 0.522529  |
| 12               | 6                | 0              | 0.830264                | -2.362565 | -0.528813 |
| 13               | 6                | 0              | 1.295437                | -1.296123 | 0.152266  |
| 14               | 6                | 0              | 2.679595                | -0.842386 | 0.268213  |
| 15               | 6                | 0              | 2.975112                | 0.218150  | 1.150289  |
| 16               | 6                | 0              | 4.269454                | 0.717193  | 1.287943  |
| 17               | 6                | 0              | 5.309785                | 0.157314  | 0.534318  |
| 18               | 6                | 0              | 5.041732                | -0.897234 | -0.352223 |

|    |   |   |           |           |           |
|----|---|---|-----------|-----------|-----------|
| 19 | 6 | 0 | 3.744797  | -1.384696 | -0.479235 |
| 20 | 8 | 0 | 6.558733  | 0.682682  | 0.702774  |
| 21 | 8 | 0 | -0.098485 | 2.400573  | -0.805418 |
| 22 | 8 | 0 | -1.202153 | 2.380752  | 1.666878  |
| 23 | 8 | 0 | -3.642837 | 3.224521  | 0.830334  |
| 24 | 8 | 0 | 2.700820  | 2.715797  | -1.031460 |
| 25 | 8 | 0 | -2.217781 | 4.062305  | -1.586656 |
| 26 | 1 | 0 | -4.808709 | -1.874768 | 1.123052  |
| 27 | 1 | 0 | -2.692491 | 1.406866  | -0.705186 |
| 28 | 1 | 0 | -4.513419 | 1.636747  | 0.687787  |
| 29 | 1 | 0 | -2.246061 | -4.118088 | 0.139142  |
| 30 | 1 | 0 | 1.500822  | -3.060910 | -1.023890 |
| 31 | 1 | 0 | 0.571155  | -0.681104 | 0.680347  |
| 32 | 1 | 0 | 2.173655  | 0.662681  | 1.734266  |
| 33 | 1 | 0 | 4.485809  | 1.531741  | 1.971495  |
| 34 | 1 | 0 | 5.845823  | -1.326241 | -0.943969 |
| 35 | 1 | 0 | 3.560879  | -2.191345 | -1.181419 |
| 36 | 1 | 0 | 7.200858  | 0.227869  | 0.138624  |
| 37 | 1 | 0 | -1.376806 | 1.439621  | 1.813539  |
| 38 | 1 | 0 | -2.774935 | 2.991733  | 1.256340  |
| 39 | 1 | 0 | -4.059975 | 3.894819  | 1.388228  |
| 40 | 1 | 0 | -0.711769 | 2.404366  | 0.801564  |
| 41 | 1 | 0 | 0.865409  | 2.537575  | -0.904768 |
| 42 | 1 | 0 | -0.307025 | 1.463025  | -1.149065 |
| 43 | 1 | 0 | 3.053088  | 2.539722  | -1.914861 |
| 44 | 1 | 0 | 3.122808  | 2.061792  | -0.450976 |
| 45 | 1 | 0 | -2.814662 | 3.890436  | -0.836605 |
| 46 | 1 | 0 | -1.413150 | 3.538517  | -1.384737 |

## TS2-5wj

| Center<br>Number | Atomic<br>Number | Atomic<br>Type | Coordinates (Angstroms) |           |           |
|------------------|------------------|----------------|-------------------------|-----------|-----------|
|                  |                  |                | X                       | Y         | Z         |
| 1                | 6                | 0              | -2.976503               | -0.395725 | -1.324388 |
| 2                | 6                | 0              | -2.329542               | -1.084649 | -0.285613 |
| 3                | 6                | 0              | -3.050802               | -1.332708 | 0.895264  |
| 4                | 6                | 0              | -4.376881               | -0.930255 | 1.031726  |
| 5                | 6                | 0              | -5.013830               | -0.267652 | -0.028329 |
| 6                | 6                | 0              | -4.308714               | 0.005523  | -1.209568 |
| 7                | 6                | 0              | -0.926174               | -1.521702 | -0.441866 |
| 8                | 6                | 0              | -0.488573               | -2.769213 | 0.086339  |
| 9                | 6                | 0              | 0.887373                | -3.035827 | 0.122578  |
| 10               | 8                | 0              | 1.389166                | -4.203451 | 0.376518  |
| 11               | 8                | 0              | -6.313655               | 0.147817  | 0.033598  |
| 12               | 6                | 0              | 1.811231                | -1.883837 | -0.029616 |
| 13               | 6                | 0              | 1.377761                | -0.537320 | 0.201816  |
| 14               | 6                | 0              | 2.321581                | 0.501591  | 0.252450  |
| 15               | 6                | 0              | 3.680110                | 0.238172  | 0.034090  |
| 16               | 6                | 0              | 4.136839                | -1.067871 | -0.174811 |
| 17               | 6                | 0              | 3.208704                | -2.112219 | -0.167159 |
| 18               | 8                | 0              | 0.086038                | -0.227222 | 0.397264  |
| 19               | 8                | 0              | 3.667249                | -3.384869 | -0.281570 |
| 20               | 8                | 0              | 4.602946                | 1.241924  | 0.017951  |
| 21               | 8                | 0              | 1.228142                | 3.360709  | -1.756607 |
| 22               | 8                | 0              | 3.273372                | 3.662106  | -0.026858 |
| 23               | 8                | 0              | -0.463779               | 2.376837  | 0.110440  |
| 24               | 8                | 0              | 1.159360                | 3.745949  | 1.989175  |
| 25               | 8                | 0              | -3.205688               | 2.825473  | 0.056812  |
| 26               | 1                | 0              | 5.193332                | -1.273301 | -0.306575 |
| 27               | 1                | 0              | 1.985427                | 1.512137  | 0.437835  |
| 28               | 1                | 0              | 4.157139                | 2.120957  | 0.053111  |
| 29               | 1                | 0              | 2.862147                | -3.958550 | -0.030786 |
| 30               | 1                | 0              | -1.187839               | -3.465835 | 0.536796  |
| 31               | 1                | 0              | -0.493224               | -1.211111 | -1.394014 |
| 32               | 1                | 0              | -2.434651               | -0.175125 | -2.239936 |
| 33               | 1                | 0              | -4.813613               | 0.514692  | -2.024519 |
| 34               | 1                | 0              | -4.917774               | -1.127143 | 1.953187  |
| 35               | 1                | 0              | -2.562709               | -1.839729 | 1.721546  |
| 36               | 1                | 0              | -6.703176               | -0.072398 | 0.892318  |
| 37               | 1                | 0              | 1.382216                | 2.692228  | -2.437607 |
| 38               | 1                | 0              | 2.599487                | 3.617404  | -0.756804 |
| 39               | 1                | 0              | 3.807299                | 4.452768  | -0.182688 |
| 40               | 1                | 0              | 0.532871                | 2.984982  | -1.156759 |
| 41               | 1                | 0              | -1.430487               | 2.547190  | 0.097325  |

|    |   |   |           |          |           |
|----|---|---|-----------|----------|-----------|
| 42 | 1 | 0 | -0.336147 | 1.394670 | 0.215460  |
| 43 | 1 | 0 | -3.602836 | 2.983397 | 0.924683  |
| 44 | 1 | 0 | -3.618573 | 2.009477 | -0.271928 |
| 45 | 1 | 0 | 1.964993  | 3.807907 | 1.445234  |
| 46 | 1 | 0 | 0.515422  | 3.285347 | 1.412851  |

### INT2-5wj

| Center<br>Number | Atomic<br>Number | Atomic<br>Type | Coordinates (Angstroms) |           |           |
|------------------|------------------|----------------|-------------------------|-----------|-----------|
|                  |                  |                | X                       | Y         | Z         |
| 1                | 6                | 0              | 3.312033                | -2.032017 | -0.013608 |
| 2                | 6                | 0              | 1.906708                | -1.860534 | -0.051126 |
| 3                | 6                | 0              | 1.408657                | -0.553041 | 0.051377  |
| 4                | 6                | 0              | 2.242777                | 0.557738  | 0.161143  |
| 5                | 6                | 0              | 3.633162                | 0.357729  | 0.155829  |
| 6                | 6                | 0              | 4.173785                | -0.930177 | 0.069040  |
| 7                | 6                | 0              | 0.980512                | -3.023097 | -0.053988 |
| 8                | 8                | 0              | 1.515804                | -4.213181 | 0.131522  |
| 9                | 8                | 0              | 0.048641                | -0.338351 | 0.110627  |
| 10               | 8                | 0              | 4.500599                | 1.408597  | 0.232253  |
| 11               | 8                | 0              | 3.817121                | -3.287981 | -0.038568 |
| 12               | 6                | 0              | -0.352401               | -2.741304 | -0.213939 |
| 13               | 6                | 0              | -0.768822               | -1.350356 | -0.600974 |
| 14               | 6                | 0              | -2.211202               | -1.025205 | -0.295584 |
| 15               | 6                | 0              | -3.105227               | -0.686208 | -1.316612 |
| 16               | 6                | 0              | -4.446940               | -0.399571 | -1.039217 |
| 17               | 6                | 0              | -4.903226               | -0.443315 | 0.284196  |
| 18               | 6                | 0              | -4.016323               | -0.768357 | 1.321113  |
| 19               | 6                | 0              | -2.686772               | -1.062457 | 1.023219  |
| 20               | 8                | 0              | -6.222850               | -0.151839 | 0.503990  |
| 21               | 8                | 0              | -0.649432               | 2.340204  | -0.102821 |
| 22               | 8                | 0              | 1.161459                | 3.486817  | -1.784706 |
| 23               | 8                | 0              | 3.059650                | 3.763894  | 0.109879  |
| 24               | 8                | 0              | -3.362145               | 2.673391  | -0.484411 |
| 25               | 8                | 0              | 0.803415                | 3.660797  | 1.968821  |
| 26               | 1                | 0              | 5.248397                | -1.076701 | 0.083401  |
| 27               | 1                | 0              | 1.823230                | 1.549650  | 0.247085  |
| 28               | 1                | 0              | 4.010093                | 2.263644  | 0.214703  |
| 29               | 1                | 0              | 2.964695                | -3.885818 | 0.032360  |
| 30               | 1                | 0              | -1.104816               | -3.523253 | -0.196302 |
| 31               | 1                | 0              | -0.583558               | -1.140467 | -1.669383 |
| 32               | 1                | 0              | -2.756706               | -0.640992 | -2.344926 |
| 33               | 1                | 0              | -5.142902               | -0.152041 | -1.834558 |
| 34               | 1                | 0              | -4.368112               | -0.795328 | 2.348991  |
| 35               | 1                | 0              | -2.002529               | -1.321844 | 1.825134  |
| 36               | 1                | 0              | -6.425215               | -0.188648 | 1.449893  |
| 37               | 1                | 0              | 1.379971                | 2.878602  | -2.503480 |
| 38               | 1                | 0              | 2.450369                | 3.739220  | -0.674644 |
| 39               | 1                | 0              | 3.566997                | 4.584561  | 0.048405  |
| 40               | 1                | 0              | 0.433269                | 3.055526  | -1.272203 |
| 41               | 1                | 0              | -1.616384               | 2.479755  | -0.220260 |
| 42               | 1                | 0              | -0.508063               | 1.370674  | -0.031374 |
| 43               | 1                | 0              | -3.845912               | 3.038378  | 0.269613  |
| 44               | 1                | 0              | -3.751257               | 1.796540  | -0.643004 |
| 45               | 1                | 0              | 1.639985                | 3.772695  | 1.482332  |
| 46               | 1                | 0              | 0.210027                | 3.218118  | 1.330310  |

### INT1-6w

| Center<br>Number | Atomic<br>Number | Atomic<br>Type | Coordinates (Angstroms) |           |           |
|------------------|------------------|----------------|-------------------------|-----------|-----------|
|                  |                  |                | X                       | Y         | Z         |
| 1                | 6                | 0              | 2.319539                | -0.576421 | 0.931306  |
| 2                | 6                | 0              | 1.723821                | -1.699123 | 0.323031  |
| 3                | 6                | 0              | 2.566837                | -2.623031 | -0.326820 |
| 4                | 6                | 0              | 3.940546                | -2.409507 | -0.407304 |
| 5                | 6                | 0              | 4.495532                | -1.260466 | 0.172055  |
| 6                | 6                | 0              | 3.689984                | -0.356731 | 0.867815  |
| 7                | 6                | 0              | 0.266969                | -1.774920 | 0.311291  |
| 8                | 6                | 0              | -0.530960               | -2.739276 | -0.186253 |
| 9                | 6                | 0              | -2.002123               | -2.628113 | -0.140716 |

|    |   |   |           |           |           |
|----|---|---|-----------|-----------|-----------|
| 10 | 8 | 0 | -2.642407 | -3.696438 | 0.125822  |
| 11 | 8 | 0 | 5.825639  | -0.928681 | 0.044145  |
| 12 | 6 | 0 | -2.687135 | -1.358164 | -0.303520 |
| 13 | 6 | 0 | -2.136276 | -0.213905 | -1.032817 |
| 14 | 6 | 0 | -2.883139 | 0.993914  | -0.990532 |
| 15 | 6 | 0 | -4.032371 | 1.131750  | -0.230534 |
| 16 | 6 | 0 | -4.629077 | 0.023430  | 0.399284  |
| 17 | 6 | 0 | -3.982264 | -1.204677 | 0.311412  |
| 18 | 8 | 0 | -1.031379 | -0.238215 | -1.700427 |
| 19 | 8 | 0 | -4.591368 | -2.271401 | 0.893287  |
| 20 | 8 | 0 | -4.624819 | 2.356889  | -0.089039 |
| 21 | 8 | 0 | -0.047969 | 2.138430  | -0.887613 |
| 22 | 8 | 0 | -0.332031 | 1.957192  | 1.808961  |
| 23 | 8 | 0 | 2.670524  | 2.682747  | -0.567520 |
| 24 | 8 | 0 | 2.247121  | 2.755900  | 2.206743  |
| 25 | 8 | 0 | 5.252352  | 1.649535  | -1.287965 |
| 26 | 8 | 0 | -2.259120 | 4.017140  | -0.451254 |
| 27 | 1 | 0 | -5.561178 | 0.117248  | 0.944480  |
| 28 | 1 | 0 | -2.502474 | 1.837409  | -1.548358 |
| 29 | 1 | 0 | -3.965480 | 3.039333  | -0.337290 |
| 30 | 1 | 0 | -4.015863 | -3.060785 | 0.678343  |
| 31 | 1 | 0 | -0.142860 | -3.685745 | -0.555137 |
| 32 | 1 | 0 | -0.223173 | -0.894112 | 0.716455  |
| 33 | 1 | 0 | 1.689800  | 0.154392  | 1.428487  |
| 34 | 1 | 0 | 4.137424  | 0.524627  | 1.314439  |
| 35 | 1 | 0 | 4.574235  | -3.112510 | -0.941024 |
| 36 | 1 | 0 | 2.145968  | -3.500812 | -0.806908 |
| 37 | 1 | 0 | 6.309007  | -1.613015 | -0.442038 |
| 38 | 1 | 0 | -0.303260 | 1.258791  | -1.293362 |
| 39 | 1 | 0 | -1.469252 | 3.470718  | -0.644578 |
| 40 | 1 | 0 | -2.165529 | 4.819191  | -0.981243 |
| 41 | 1 | 0 | 0.928496  | 2.239568  | -0.937905 |
| 42 | 1 | 0 | 3.496242  | 2.237847  | -0.841747 |
| 43 | 1 | 0 | 2.670076  | 2.679424  | 0.413013  |
| 44 | 1 | 0 | 5.465194  | 1.631715  | -2.230451 |
| 45 | 1 | 0 | 5.594216  | 0.813752  | -0.924212 |
| 46 | 1 | 0 | -0.330570 | 1.942463  | 0.817646  |
| 47 | 1 | 0 | -0.854493 | 1.202051  | 2.106182  |
| 48 | 1 | 0 | 1.325376  | 2.408590  | 2.237854  |
| 49 | 1 | 0 | 2.746448  | 2.276509  | 2.880045  |

## TS2-6w

| Center Number | Atomic Number | Atomic Type | Coordinates (Angstroms) |           |           |
|---------------|---------------|-------------|-------------------------|-----------|-----------|
|               |               |             | X                       | Y         | Z         |
| 1             | 6             | 0           | -1.968651               | -0.193102 | -0.627848 |
| 2             | 6             | 0           | -2.832786               | -1.122191 | 0.037264  |
| 3             | 6             | 0           | -4.193204               | -0.745931 | 0.211535  |
| 4             | 6             | 0           | -4.664674               | 0.528328  | -0.125247 |
| 5             | 6             | 0           | -3.782637               | 1.416852  | -0.749856 |
| 6             | 6             | 0           | -2.481972               | 1.030612  | -1.077729 |
| 7             | 6             | 0           | -2.398005               | -2.512760 | 0.327296  |
| 8             | 8             | 0           | -3.304264               | -3.429999 | 0.449453  |
| 9             | 8             | 0           | -5.067842               | -1.644496 | 0.734777  |
| 10            | 8             | 0           | -4.206672               | 2.689666  | -1.026813 |
| 11            | 8             | 0           | -0.666325               | -0.432021 | -0.838250 |
| 12            | 6             | 0           | -1.015991               | -2.758162 | 0.349800  |
| 13            | 6             | 0           | -0.146065               | -1.637606 | 0.462329  |
| 14            | 6             | 0           | 1.313033                | -1.725321 | 0.257769  |
| 15            | 6             | 0           | 1.890063                | -2.628952 | -0.649651 |
| 16            | 6             | 0           | 3.258952                | -2.607616 | -0.913169 |
| 17            | 6             | 0           | 4.067247                | -1.667664 | -0.263317 |
| 18            | 6             | 0           | 3.521027                | -0.777359 | 0.664195  |
| 19            | 6             | 0           | 2.152334                | -0.805588 | 0.909128  |
| 20            | 8             | 0           | 5.412245                | -1.532596 | -0.531586 |
| 21            | 8             | 0           | 0.393398                | 2.085505  | -0.357522 |
| 22            | 8             | 0           | 3.090871                | 2.543939  | -0.304524 |
| 23            | 8             | 0           | 5.328913                | 1.222237  | -1.447505 |
| 24            | 8             | 0           | -1.672312               | 4.034010  | -0.797269 |
| 25            | 8             | 0           | 0.295765                | 2.290072  | 2.360128  |
| 26            | 1             | 0           | -5.689193               | 0.810818  | 0.089978  |
| 27            | 1             | 0           | -1.830198               | 1.711871  | -1.604866 |
| 28            | 1             | 0           | -3.411732               | 3.255097  | -1.133569 |
| 29            | 1             | 0           | -4.559618               | -2.524683 | 0.711836  |

|    |   |   |           |           |           |
|----|---|---|-----------|-----------|-----------|
| 30 | 1 | 0 | -0.636302 | -3.762041 | 0.190459  |
| 31 | 1 | 0 | -0.413178 | -0.899642 | 1.219844  |
| 32 | 1 | 0 | 1.723994  | -0.084902 | 1.598992  |
| 33 | 1 | 0 | 4.164486  | -0.056535 | 1.156515  |
| 34 | 1 | 0 | 3.691535  | -3.295187 | -1.634677 |
| 35 | 1 | 0 | 1.259683  | -3.335889 | -1.179535 |
| 36 | 1 | 0 | 5.707010  | -2.204127 | -1.164507 |
| 37 | 1 | 0 | 0.147407  | 1.157903  | -0.594322 |
| 38 | 1 | 0 | -0.911198 | 3.424458  | -0.681306 |
| 39 | 1 | 0 | -1.341611 | 4.784033  | -1.308077 |
| 40 | 1 | 0 | 1.370733  | 2.179621  | -0.472500 |
| 41 | 1 | 0 | 3.808329  | 2.025977  | -0.722984 |
| 42 | 1 | 0 | 3.219961  | 2.464438  | 0.665006  |
| 43 | 1 | 0 | 5.394844  | 1.269544  | -2.410535 |
| 44 | 1 | 0 | 5.490110  | 0.288970  | -1.216490 |
| 45 | 1 | 0 | 0.214140  | 2.179374  | 1.379403  |
| 46 | 1 | 0 | -0.241918 | 1.596400  | 2.763634  |
| 47 | 8 | 0 | 3.025314  | 2.443537  | 2.489082  |
| 48 | 1 | 0 | 2.051578  | 2.325427  | 2.595835  |
| 49 | 1 | 0 | 3.446380  | 1.768988  | 3.037104  |

## INT2-6w

| Center<br>Number | Atomic<br>Number | Atomic<br>Type | Coordinates (Angstroms) |           |           |
|------------------|------------------|----------------|-------------------------|-----------|-----------|
|                  |                  |                | X                       | Y         | Z         |
| 1                | 6                | 0              | 2.183584                | -0.859945 | 0.928815  |
| 2                | 6                | 0              | 1.238750                | -1.641688 | 0.251386  |
| 3                | 6                | 0              | 1.685852                | -2.522990 | -0.741700 |
| 4                | 6                | 0              | 3.039014                | -2.602550 | -1.075705 |
| 5                | 6                | 0              | 3.957931                | -1.789760 | -0.403699 |
| 6                | 6                | 0              | 3.539038                | -0.932259 | 0.614863  |
| 7                | 6                | 0              | -0.229544               | -1.423831 | 0.508932  |
| 8                | 6                | 0              | -1.112845               | -2.635390 | 0.539766  |
| 9                | 6                | 0              | -2.471680               | -2.447931 | 0.451489  |
| 10               | 8                | 0              | -3.412150               | -3.350159 | 0.638881  |
| 11               | 8                | 0              | 5.298245                | -1.751005 | -0.734039 |
| 12               | 6                | 0              | -2.919010               | -1.082842 | 0.063319  |
| 13               | 6                | 0              | -2.003724               | -0.164889 | -0.473327 |
| 14               | 6                | 0              | -2.397366               | 1.074568  | -0.962591 |
| 15               | 6                | 0              | -3.734307               | 1.462725  | -0.819993 |
| 16               | 6                | 0              | -4.691399               | 0.577770  | -0.311613 |
| 17               | 6                | 0              | -4.283143               | -0.703524 | 0.092354  |
| 18               | 8                | 0              | -0.668904               | -0.481789 | -0.560700 |
| 19               | 8                | 0              | -5.198607               | -1.603284 | 0.526602  |
| 20               | 8                | 0              | -4.115548               | 2.732728  | -1.167282 |
| 21               | 8                | 0              | 0.533020                | 2.135870  | -0.277126 |
| 22               | 8                | 0              | 0.495346                | 2.302050  | 2.466418  |
| 23               | 8                | 0              | 3.228675                | 2.472275  | -0.273831 |
| 24               | 8                | 0              | 3.238117                | 2.344611  | 2.514190  |
| 25               | 8                | 0              | 5.344579                | 1.045103  | -1.510953 |
| 26               | 8                | 0              | -1.565485               | 4.082363  | -0.819886 |
| 27               | 1                | 0              | -5.731290               | 0.873749  | -0.224804 |
| 28               | 1                | 0              | -1.673578               | 1.740728  | -1.405551 |
| 29               | 1                | 0              | -3.310111               | 3.289710  | -1.215576 |
| 30               | 1                | 0              | -4.640281               | -2.471752 | 0.641197  |
| 31               | 1                | 0              | -0.683540               | -3.601087 | 0.786755  |
| 32               | 1                | 0              | -0.330785               | -0.823788 | 1.431029  |
| 33               | 1                | 0              | 1.855071                | -0.162719 | 1.693910  |
| 34               | 1                | 0              | 4.268135                | -0.312693 | 1.126241  |
| 35               | 1                | 0              | 3.374575                | -3.271667 | -1.863486 |
| 36               | 1                | 0              | 0.964789                | -3.135586 | -1.274246 |
| 37               | 1                | 0              | 5.501721                | -2.402770 | -1.421098 |
| 38               | 1                | 0              | 0.288713                | 1.208726  | -0.470948 |
| 39               | 1                | 0              | -0.790670               | 3.503827  | -0.660828 |
| 40               | 1                | 0              | -1.236642               | 4.840459  | -1.320149 |
| 41               | 1                | 0              | 1.514204                | 2.209585  | -0.401645 |
| 42               | 1                | 0              | 3.897989                | 1.915038  | -0.721454 |
| 43               | 1                | 0              | 3.382315                | 2.373030  | 0.690852  |
| 44               | 1                | 0              | 5.406194                | 1.136840  | -2.471072 |
| 45               | 1                | 0              | 5.458534                | 0.094234  | -1.327443 |
| 46               | 1                | 0              | 0.386131                | 2.227343  | 1.487267  |
| 47               | 1                | 0              | -0.035721               | 1.594465  | 2.854879  |
| 48               | 1                | 0              | 2.264111                | 2.265364  | 2.647773  |
| 49               | 1                | 0              | 3.644921                | 1.634078  | 3.026433  |

-----  
**INT1-6wb**

| Center<br>Number | Atomic<br>Number | Atomic<br>Type | Coordinates (Angstroms) |           |           |
|------------------|------------------|----------------|-------------------------|-----------|-----------|
|                  |                  |                | X                       | Y         | Z         |
| 1                | 6                | 0              | 3.322909                | 0.721825  | 0.797662  |
| 2                | 6                | 0              | 3.071328                | -0.379815 | -0.047830 |
| 3                | 6                | 0              | 4.160699                | -0.919103 | -0.765241 |
| 4                | 6                | 0              | 5.438868                | -0.385862 | -0.644589 |
| 5                | 6                | 0              | 5.661112                | 0.708809  | 0.207291  |
| 6                | 6                | 0              | 4.598138                | 1.263584  | 0.930090  |
| 7                | 6                | 0              | 1.709572                | -0.895844 | -0.139480 |
| 8                | 6                | 0              | 1.288427                | -1.969885 | -0.845762 |
| 9                | 6                | 0              | -0.064120               | -2.539734 | -0.786365 |
| 10               | 8                | 0              | -0.128530               | -3.806505 | -0.929883 |
| 11               | 8                | 0              | 6.896667                | 1.274868  | 0.366726  |
| 12               | 6                | 0              | -1.268861               | -1.777665 | -0.480659 |
| 13               | 6                | 0              | -1.442315               | -0.365847 | -0.777700 |
| 14               | 6                | 0              | -2.592572               | 0.283935  | -0.274809 |
| 15               | 6                | 0              | -3.580987               | -0.408628 | 0.418307  |
| 16               | 6                | 0              | -3.494231               | -1.798414 | 0.611854  |
| 17               | 6                | 0              | -2.374179               | -2.467048 | 0.132158  |
| 18               | 8                | 0              | -0.598385               | 0.312939  | -1.512441 |
| 19               | 8                | 0              | -2.333062               | -3.813892 | 0.310058  |
| 20               | 8                | 0              | -4.679276               | 0.227001  | 0.908675  |
| 21               | 8                | 0              | -1.908796               | 2.052638  | -3.075511 |
| 22               | 8                | 0              | -2.317104               | 3.769788  | -0.888429 |
| 23               | 8                | 0              | -4.541647               | 2.938851  | 0.522879  |
| 24               | 8                | 0              | 0.039782                | 2.544399  | -0.037936 |
| 25               | 8                | 0              | -0.846563               | -0.975494 | 2.653945  |
| 26               | 8                | 0              | -0.075353               | 1.688626  | 2.624681  |
| 27               | 1                | 0              | -4.289819               | -2.345041 | 1.105119  |
| 28               | 1                | 0              | -2.703360               | 1.340907  | -0.467034 |
| 29               | 1                | 0              | -4.622003               | 1.201734  | 0.733763  |
| 30               | 1                | 0              | -1.514931               | -4.124263 | -0.174028 |
| 31               | 1                | 0              | 1.993958                | -2.589524 | -1.393611 |
| 32               | 1                | 0              | 0.979624                | -0.337057 | 0.438619  |
| 33               | 1                | 0              | 2.499886                | 1.158997  | 1.354943  |
| 34               | 1                | 0              | 4.780559                | 2.111210  | 1.582610  |
| 35               | 1                | 0              | 6.265126                | -0.812345 | -1.205859 |
| 36               | 1                | 0              | 4.012087                | -1.763628 | -1.429659 |
| 37               | 1                | 0              | 7.551985                | 0.823496  | -0.187139 |
| 38               | 1                | 0              | -1.396445               | 1.397645  | -2.516704 |
| 39               | 1                | 0              | -1.499370               | 3.443132  | -0.443320 |
| 41               | 1                | 0              | -5.316614               | 3.270592  | 0.047652  |
| 42               | 1                | 0              | 0.023798                | 2.235664  | 0.894534  |
| 43               | 1                | 0              | -0.140458               | 1.735372  | -0.580863 |
| 44               | 1                | 0              | -1.816899               | -0.984751 | 2.648191  |
| 45               | 1                | 0              | -0.617540               | -1.323485 | 1.775098  |
| 46               | 1                | 0              | -2.295125               | 3.282660  | -1.742879 |
| 47               | 1                | 0              | -1.267593               | 2.422953  | -3.697889 |
| 48               | 1                | 0              | -0.325752               | 0.735212  | 2.643495  |
| 49               | 1                | 0              | 0.789722                | 1.738903  | 3.054792  |

-----  
**TS2-6wb**

| Center<br>Number | Atomic<br>Number | Atomic<br>Type | Coordinates (Angstroms) |           |           |
|------------------|------------------|----------------|-------------------------|-----------|-----------|
|                  |                  |                | X                       | Y         | Z         |
| 1                | 6                | 0              | 3.158589                | -0.048330 | 1.253763  |
| 2                | 6                | 0              | 2.610416                | -0.812584 | 0.208246  |
| 3                | 6                | 0              | 3.400503                | -1.046401 | -0.931537 |
| 4                | 6                | 0              | 4.699783                | -0.553778 | -1.020012 |
| 5                | 6                | 0              | 5.230451                | 0.194045  | 0.041901  |
| 6                | 6                | 0              | 4.458197                | 0.446753  | 1.182710  |
| 7                | 6                | 0              | 1.221929                | -1.299518 | 0.304645  |
| 8                | 6                | 0              | 0.816973                | -2.523386 | -0.317644 |
| 9                | 6                | 0              | -0.540621               | -2.798729 | -0.475916 |
| 10               | 8                | 0              | -1.000799               | -3.962071 | -0.848010 |
| 11               | 8                | 0              | 6.499926                | 0.706263  | 0.013993  |
| 12               | 6                | 0              | -1.502512               | -1.676697 | -0.336306 |



|    |   |   |           |           |           |
|----|---|---|-----------|-----------|-----------|
| 13 | 6 | 0 | -1.078731 | -0.314186 | -0.459337 |
| 14 | 6 | 0 | -2.022800 | 0.713624  | -0.563277 |
| 15 | 6 | 0 | -3.391153 | 0.423595  | -0.518777 |
| 16 | 6 | 0 | -3.845940 | -0.897553 | -0.417976 |
| 17 | 6 | 0 | -2.905855 | -1.926978 | -0.369451 |
| 18 | 8 | 0 | 0.222276  | 0.031146  | -0.486817 |
| 19 | 8 | 0 | -3.349677 | -3.211681 | -0.360223 |
| 20 | 8 | 0 | -4.321917 | 1.416054  | -0.568185 |
| 21 | 8 | 0 | 0.830953  | 2.004830  | -2.310282 |
| 22 | 8 | 0 | -0.439305 | 3.913688  | -0.635780 |
| 23 | 8 | 0 | -3.193856 | 3.900870  | -0.794854 |
| 24 | 8 | 0 | 0.406036  | 2.170212  | 1.365327  |
| 25 | 8 | 0 | -1.796089 | -1.268101 | 2.798923  |
| 26 | 8 | 0 | -1.723557 | 1.493549  | 3.037988  |
| 27 | 1 | 0 | -4.906598 | -1.123187 | -0.420470 |
| 28 | 1 | 0 | -1.677279 | 1.733899  | -0.637063 |
| 29 | 1 | 0 | -3.884244 | 2.301599  | -0.659177 |
| 30 | 1 | 0 | -2.514757 | -3.761481 | -0.559976 |
| 31 | 1 | 0 | 1.553133  | -3.199295 | -0.740897 |
| 32 | 1 | 0 | 0.755444  | -1.054739 | 1.258443  |
| 33 | 1 | 0 | 2.558075  | 0.159136  | 2.134438  |
| 34 | 1 | 0 | 4.880172  | 1.029907  | 1.994739  |
| 35 | 1 | 0 | 5.299742  | -0.739810 | -1.906058 |
| 36 | 1 | 0 | 2.991619  | -1.610678 | -1.763526 |
| 37 | 1 | 0 | 6.940607  | 0.473267  | -0.817486 |
| 38 | 1 | 0 | 0.654955  | 1.257481  | -1.688960 |
| 39 | 1 | 0 | -0.186647 | 3.414730  | 0.176775  |
| 40 | 1 | 0 | -2.203630 | 3.919219  | -0.765489 |
| 41 | 1 | 0 | -3.438142 | 4.303770  | -1.640289 |
| 42 | 1 | 0 | -0.339462 | 1.954270  | 1.970378  |
| 43 | 1 | 0 | 0.444829  | 1.411753  | 0.742737  |
| 44 | 1 | 0 | -2.689581 | -1.602653 | 2.966304  |
| 45 | 1 | 0 | -1.646724 | -1.428082 | 1.846622  |
| 46 | 1 | 0 | -0.028277 | 3.377684  | -1.348724 |
| 47 | 1 | 0 | 1.786652  | 2.150241  | -2.264862 |
| 48 | 1 | 0 | -1.775243 | 0.510193  | 2.979452  |
| 49 | 1 | 0 | -1.501955 | 1.685444  | 3.960273  |

-----

### INT2-6wb

| Center<br>Number | Atomic<br>Number | Atomic<br>Type | Coordinates (Angstroms) |           |           |
|------------------|------------------|----------------|-------------------------|-----------|-----------|
|                  |                  |                | X                       | Y         | Z         |
| 1                | 6                | 0              | 3.220473                | -0.281498 | 1.353779  |
| 2                | 6                | 0              | 2.484271                | -0.817459 | 0.290024  |
| 3                | 6                | 0              | 3.101770                | -0.925239 | -0.964340 |
| 4                | 6                | 0              | 4.418599                | -0.506928 | -1.157786 |
| 5                | 6                | 0              | 5.140318                | 0.022167  | -0.078305 |
| 6                | 6                | 0              | 4.542979                | 0.131479  | 1.181744  |
| 7                | 6                | 0              | 1.039391                | -1.204917 | 0.477513  |
| 8                | 6                | 0              | 0.652096                | -2.559502 | -0.043657 |
| 9                | 6                | 0              | -0.658952               | -2.827703 | -0.328802 |
| 10               | 8                | 0              | -1.163807               | -4.012758 | -0.641548 |
| 11               | 8                | 0              | 6.439625                | 0.450248  | -0.199469 |
| 12               | 6                | 0              | -1.595291               | -1.674233 | -0.334579 |
| 13               | 6                | 0              | -1.098444               | -0.359677 | -0.316218 |
| 14               | 6                | 0              | -1.917517               | 0.753328  | -0.461552 |
| 15               | 6                | 0              | -3.295872               | 0.556156  | -0.628197 |
| 16               | 6                | 0              | -3.841312               | -0.733512 | -0.653587 |
| 17               | 6                | 0              | -2.989342               | -1.836408 | -0.530992 |
| 18               | 8                | 0              | 0.253684                | -0.132092 | -0.199664 |
| 19               | 8                | 0              | -3.495934               | -3.093545 | -0.620373 |
| 20               | 8                | 0              | -4.144033               | 1.615301  | -0.765174 |
| 21               | 8                | 0              | 1.177378                | 1.675744  | -2.154743 |
| 22               | 8                | 0              | -0.043337               | 3.801015  | -0.708929 |
| 23               | 8                | 0              | -2.786471               | 3.989136  | -0.976048 |
| 24               | 8                | 0              | 0.520865                | 2.212696  | 1.514556  |
| 25               | 8                | 0              | -2.104790               | -0.990806 | 2.796286  |
| 26               | 8                | 0              | -1.812245               | 1.767799  | 2.961355  |
| 27               | 1                | 0              | -4.906272               | -0.878962 | -0.798971 |
| 28               | 1                | 0              | -1.491505               | 1.744913  | -0.434899 |
| 29               | 1                | 0              | -3.632995               | 2.462851  | -0.825215 |
| 30               | 1                | 0              | -2.652902               | -3.690130 | -0.646929 |
| 31               | 1                | 0              | 1.405396                | -3.341142 | -0.058557 |

|    |   |   |           |           |           |
|----|---|---|-----------|-----------|-----------|
| 32 | 1 | 0 | 0.776063  | -1.085521 | 1.540356  |
| 33 | 1 | 0 | 2.755211  | -0.179302 | 2.330151  |
| 34 | 1 | 0 | 5.112080  | 0.542664  | 2.009396  |
| 35 | 1 | 0 | 4.884232  | -0.590142 | -2.136041 |
| 36 | 1 | 0 | 2.543843  | -1.333671 | -1.801557 |
| 37 | 1 | 0 | 6.751892  | 0.325681  | -1.108166 |
| 38 | 1 | 0 | 0.925194  | 0.977606  | -1.514774 |
| 39 | 1 | 0 | 0.130526  | 3.381514  | 0.165630  |
| 40 | 1 | 0 | -1.799717 | 3.928591  | -0.917629 |
| 41 | 1 | 0 | -2.973534 | 4.386312  | -1.838544 |
| 42 | 1 | 0 | -0.299238 | 2.084937  | 2.045760  |
| 43 | 1 | 0 | 0.570330  | 1.414490  | 0.955064  |
| 44 | 1 | 0 | -3.029509 | -1.251775 | 2.918497  |
| 45 | 1 | 0 | -1.904233 | -1.211718 | 1.867875  |
| 46 | 1 | 0 | 0.366205  | 3.168398  | -1.337909 |
| 47 | 1 | 0 | 2.144017  | 1.707878  | -2.109910 |
| 48 | 1 | 0 | -1.945296 | 0.791601  | 2.917413  |
| 49 | 1 | 0 | -1.676272 | 1.966698  | 3.898704  |

### TS2-6wc

| Center<br>Number | Atomic<br>Number | Atomic<br>Type | Coordinates (Angstroms) |           |           |
|------------------|------------------|----------------|-------------------------|-----------|-----------|
|                  |                  |                | X                       | Y         | Z         |
| 1                | 6                | 0              | 0.896069                | 3.890135  | 0.195460  |
| 2                | 6                | 0              | -0.113463               | 2.899344  | 0.050771  |
| 3                | 6                | 0              | 0.304980                | 1.581455  | -0.312367 |
| 4                | 6                | 0              | 1.666605                | 1.290810  | -0.469092 |
| 5                | 6                | 0              | 2.634141                | 2.277554  | -0.230897 |
| 6                | 6                | 0              | 2.257048                | 3.586125  | 0.093060  |
| 7                | 6                | 0              | -1.546939               | 3.291035  | 0.049589  |
| 8                | 8                | 0              | -1.841771               | 4.546543  | -0.086268 |
| 9                | 8                | 0              | -0.581642               | 0.591348  | -0.533770 |
| 10               | 8                | 0              | 3.963286                | 1.992793  | -0.309307 |
| 11               | 8                | 0              | 0.534873                | 5.177191  | 0.432334  |
| 12               | 6                | 0              | -2.497130               | 2.262823  | 0.096565  |
| 13               | 6                | 0              | -2.067362               | 0.957498  | 0.479624  |
| 14               | 6                | 0              | -2.923823               | -0.232176 | 0.298699  |
| 15               | 6                | 0              | -2.788653               | -1.328980 | 1.169042  |
| 16               | 6                | 0              | -3.549664               | -2.483775 | 1.005706  |
| 17               | 6                | 0              | -4.463315               | -2.562419 | -0.053006 |
| 18               | 6                | 0              | -4.606670               | -1.485954 | -0.940351 |
| 19               | 6                | 0              | -3.838610               | -0.337448 | -0.762412 |
| 20               | 8                | 0              | -5.185062               | -3.717919 | -0.173972 |
| 21               | 8                | 0              | 0.422160                | -1.790432 | -0.108898 |
| 22               | 8                | 0              | 2.467144                | -1.755745 | 1.678437  |
| 23               | 8                | 0              | 4.298278                | -0.697547 | -0.239532 |
| 24               | 8                | 0              | 2.627110                | -2.208955 | -1.859670 |
| 25               | 8                | 0              | 3.549577                | -4.284760 | 1.565175  |
| 26               | 1                | 0              | 3.003315                | 4.359070  | 0.240215  |
| 27               | 1                | 0              | 1.967353                | 0.289377  | -0.743785 |
| 28               | 1                | 0              | 4.099766                | 1.010102  | -0.365582 |
| 29               | 1                | 0              | -0.470266               | 5.184991  | 0.260158  |
| 30               | 1                | 0              | -3.511184               | 2.446351  | -0.242370 |
| 31               | 1                | 0              | -1.450604               | 0.893109  | 1.378010  |
| 32               | 1                | 0              | -2.076726               | -1.274630 | 1.988512  |
| 33               | 1                | 0              | -3.446462               | -3.325248 | 1.683075  |
| 34               | 1                | 0              | -5.308909               | -1.553681 | -1.766917 |
| 35               | 1                | 0              | -3.943117               | 0.483112  | -1.464972 |
| 36               | 1                | 0              | -5.785444               | -3.666018 | -0.931794 |
| 37               | 1                | 0              | -0.013870               | -0.897271 | -0.272264 |
| 38               | 1                | 0              | 2.238122                | -1.342836 | 2.521553  |
| 39               | 1                | 0              | 3.833265                | -0.968792 | 0.577004  |
| 40               | 1                | 0              | 3.812635                | -1.200174 | -0.936187 |
| 41               | 1                | 0              | 1.785266                | -2.125180 | -1.367275 |
| 42               | 1                | 0              | 2.929891                | -3.130322 | -1.692048 |
| 43               | 1                | 0              | 1.648990                | -1.742175 | 1.119456  |
| 44               | 1                | 0              | -0.292599               | -2.430443 | 0.010677  |
| 45               | 1                | 0              | 4.422644                | -4.279586 | 1.979606  |
| 46               | 1                | 0              | 3.180431                | -3.379781 | 1.691640  |
| 47               | 8                | 0              | 3.569548                | -4.710943 | -1.138494 |
| 48               | 1                | 0              | 3.579438                | -4.632571 | -0.153625 |
| 49               | 1                | 0              | 3.030780                | -5.486162 | -1.343712 |

## INT1-6wd

| Center<br>Number | Atomic<br>Number | Atomic<br>Type | Coordinates (Angstroms) |           |           |
|------------------|------------------|----------------|-------------------------|-----------|-----------|
|                  |                  |                | X                       | Y         | Z         |
| 1                | 6                | 0              | -3.731910               | -1.809585 | 0.369188  |
| 2                | 6                | 0              | -2.445358               | -1.697190 | -0.264998 |
| 3                | 6                | 0              | -2.028554               | -0.382442 | -0.756845 |
| 4                | 6                | 0              | -2.816099               | 0.739662  | -0.368644 |
| 5                | 6                | 0              | -4.003356               | 0.582259  | 0.340387  |
| 6                | 6                | 0              | -4.491526               | -0.695664 | 0.691517  |
| 7                | 6                | 0              | -1.617482               | -2.874001 | -0.356568 |
| 8                | 8                | 0              | -2.101040               | -4.049168 | -0.272250 |
| 9                | 8                | 0              | -1.019021               | -0.239268 | -1.542528 |
| 10               | 8                | 0              | -4.768688               | 1.645093  | 0.702850  |
| 11               | 8                | 0              | -4.216137               | -3.031907 | 0.713057  |
| 12               | 6                | 0              | -0.139714               | -2.774622 | -0.438048 |
| 13               | 6                | 0              | 0.557835                | -1.937255 | 0.350020  |
| 14               | 6                | 0              | 2.006424                | -1.724575 | 0.369045  |
| 15               | 6                | 0              | 2.582126                | -1.002998 | 1.435380  |
| 16               | 6                | 0              | 3.935984                | -0.669556 | 1.443747  |
| 17               | 6                | 0              | 4.739773                | -1.044432 | 0.364464  |
| 18               | 6                | 0              | 4.204667                | -1.791570 | -0.691968 |
| 19               | 6                | 0              | 2.853091                | -2.124895 | -0.684115 |
| 20               | 8                | 0              | 6.038680                | -0.585218 | 0.364401  |
| 21               | 8                | 0              | -3.616252               | 4.034759  | 0.177554  |
| 22               | 8                | 0              | -1.013528               | 4.078393  | -0.461432 |
| 23               | 8                | 0              | 0.127520                | 2.084993  | -1.926121 |
| 24               | 8                | 0              | 1.092512                | 3.772624  | 1.373336  |
| 25               | 8                | 0              | 2.436929                | 1.900268  | -0.183012 |
| 26               | 8                | 0              | 5.198774                | 2.161241  | -0.263249 |
| 27               | 1                | 0              | -5.440395               | -0.803496 | 1.204392  |
| 28               | 1                | 0              | -2.498869               | 1.723712  | -0.692317 |
| 29               | 1                | 0              | -4.327736               | 2.500084  | 0.459785  |
| 30               | 1                | 0              | -3.553716               | -3.694094 | 0.363519  |
| 31               | 1                | 0              | 0.347990                | -3.496005 | -1.089799 |
| 32               | 1                | 0              | -0.007148               | -1.299355 | 1.027868  |
| 33               | 1                | 0              | 1.954948                | -0.685384 | 2.264050  |
| 34               | 1                | 0              | 4.366041                | -0.094372 | 2.256985  |
| 35               | 1                | 0              | 4.832214                | -2.074782 | -1.532182 |
| 36               | 1                | 0              | 2.444577                | -2.665563 | -1.531599 |
| 37               | 1                | 0              | 6.544671                | -0.982500 | -0.360435 |
| 38               | 1                | 0              | -0.339648               | 1.203062  | -1.773490 |
| 39               | 1                | 0              | -0.379686               | 4.066563  | 0.286798  |
| 40               | 1                | 0              | -2.648665               | 4.047948  | -0.061344 |
| 41               | 1                | 0              | -4.065088               | 4.583002  | -0.479125 |
| 42               | 1                | 0              | 5.665730                | 1.327607  | -0.071363 |
| 43               | 1                | 0              | 5.603996                | 2.512688  | -1.067466 |
| 44               | 1                | 0              | 2.339660                | 1.016773  | 0.206152  |
| 45               | 1                | 0              | 3.410192                | 2.026459  | -0.276326 |
| 46               | 1                | 0              | -0.679347               | 3.357761  | -1.055707 |
| 47               | 1                | 0              | 0.989077                | 2.011619  | -1.475729 |
| 48               | 1                | 0              | 0.908555                | 3.384028  | 2.238620  |
| 49               | 1                | 0              | 1.619259                | 3.100951  | 0.882495  |

## TS2-6wd

| Center<br>Number | Atomic<br>Number | Atomic<br>Type | Coordinates (Angstroms) |           |           |
|------------------|------------------|----------------|-------------------------|-----------|-----------|
|                  |                  |                | X                       | Y         | Z         |
| 1                | 6                | 0              | 2.382083                | -1.388227 | 1.423192  |
| 2                | 6                | 0              | 1.575754                | -1.813813 | 0.353444  |
| 3                | 6                | 0              | 2.190727                | -2.071090 | -0.882742 |
| 4                | 6                | 0              | 3.564480                | -1.911270 | -1.052342 |
| 5                | 6                | 0              | 4.346042                | -1.489944 | 0.028874  |
| 6                | 6                | 0              | 3.761360                | -1.236126 | 1.273689  |
| 7                | 6                | 0              | 0.111336                | -1.925441 | 0.522880  |
| 8                | 6                | 0              | -0.633506               | -2.945460 | -0.124218 |
| 9                | 6                | 0              | -2.034660               | -2.840356 | -0.146361 |
| 10               | 8                | 0              | -2.817192               | -3.810680 | -0.499902 |
| 11               | 8                | 0              | 5.700012                | -1.258168 | -0.086541 |
| 12               | 6                | 0              | -2.629316               | -1.509625 | 0.128593  |
| 13               | 6                | 0              | -1.860584               | -0.301227 | 0.018707  |

|    |   |   |           |           |           |
|----|---|---|-----------|-----------|-----------|
| 14 | 6 | 0 | -2.507065 | 0.947677  | 0.032439  |
| 15 | 6 | 0 | -3.897245 | 1.024833  | 0.187226  |
| 16 | 6 | 0 | -4.675144 | -0.135691 | 0.297842  |
| 17 | 6 | 0 | -4.044093 | -1.378806 | 0.232686  |
| 18 | 8 | 0 | -0.531243 | -0.309124 | -0.118331 |
| 19 | 8 | 0 | -4.816777 | -2.495560 | 0.241451  |
| 20 | 8 | 0 | -4.543039 | 2.221014  | 0.242365  |
| 21 | 8 | 0 | 5.636704  | 1.621643  | -0.118192 |
| 22 | 8 | 0 | 0.743805  | 1.563239  | -1.610712 |
| 23 | 8 | 0 | -0.353529 | 3.956096  | -0.785308 |
| 24 | 8 | 0 | -2.939447 | 4.354140  | -0.203169 |
| 25 | 8 | 0 | 2.916140  | 1.819105  | 0.213714  |
| 26 | 1 | 0 | -5.754562 | -0.073447 | 0.380531  |
| 27 | 1 | 0 | -1.906336 | 1.846585  | -0.038405 |
| 28 | 1 | 0 | -3.918636 | 2.972938  | 0.074857  |
| 29 | 1 | 0 | -4.181281 | -3.234061 | -0.060287 |
| 30 | 1 | 0 | -0.143029 | -3.733321 | -0.686571 |
| 31 | 1 | 0 | -0.224261 | -1.622533 | 1.515240  |
| 32 | 1 | 0 | 1.926120  | -1.176437 | 2.386464  |
| 33 | 1 | 0 | 4.384622  | -0.912426 | 2.100896  |
| 34 | 1 | 0 | 4.023529  | -2.091018 | -2.020468 |
| 35 | 1 | 0 | 1.582639  | -2.373837 | -1.729016 |
| 36 | 1 | 0 | 6.033878  | -1.598316 | -0.930446 |
| 37 | 1 | 0 | 0.266008  | 0.854129  | -1.112127 |
| 38 | 1 | 0 | 0.274495  | 4.116110  | -0.047724 |
| 39 | 1 | 0 | -1.982371 | 4.202124  | -0.431742 |
| 40 | 1 | 0 | -3.286596 | 4.952226  | -0.877876 |
| 41 | 1 | 0 | 5.854743  | 0.670260  | -0.132919 |
| 42 | 1 | 0 | 6.029372  | 1.997970  | -0.917458 |
| 43 | 1 | 0 | 2.751112  | 1.021576  | 0.740530  |
| 44 | 1 | 0 | 3.888527  | 1.812271  | 0.042104  |
| 45 | 1 | 0 | -0.054158 | 3.094893  | -1.165336 |
| 46 | 1 | 0 | 1.597925  | 1.648653  | -1.143419 |
| 47 | 8 | 0 | 1.671105  | 4.108971  | 1.139545  |
| 48 | 1 | 0 | 1.433573  | 4.011989  | 2.071026  |
| 49 | 1 | 0 | 2.171366  | 3.295666  | 0.899342  |

## INT2-6wd

| Center<br>Number | Atomic<br>Number | Atomic<br>Type | Coordinates (Angstroms) |           |           |
|------------------|------------------|----------------|-------------------------|-----------|-----------|
|                  |                  |                | X                       | Y         | Z         |
| 1                | 6                | 0              | 4.137600                | -1.258727 | -0.045684 |
| 2                | 6                | 0              | 2.735283                | -1.446123 | -0.106031 |
| 3                | 6                | 0              | 1.926523                | -0.299132 | -0.111312 |
| 4                | 6                | 0              | 2.452653                | 0.992058  | -0.081677 |
| 5                | 6                | 0              | 3.850314                | 1.144016  | -0.045934 |
| 6                | 6                | 0              | 4.694268                | 0.026086  | -0.032878 |
| 7                | 6                | 0              | 2.127069                | -2.799439 | -0.016998 |
| 8                | 8                | 0              | 2.937873                | -3.800984 | 0.262350  |
| 9                | 8                | 0              | 0.556411                | -0.424792 | -0.081327 |
| 10               | 8                | 0              | 4.435027                | 2.373679  | -0.030672 |
| 11               | 8                | 0              | 4.939990                | -2.347400 | 0.028814  |
| 12               | 6                | 0              | 0.769440                | -2.873939 | -0.197450 |
| 13               | 6                | 0              | 0.028095                | -1.666070 | -0.695038 |
| 14               | 6                | 0              | -1.454722               | -1.675551 | -0.407730 |
| 15               | 6                | 0              | -2.388847               | -1.476114 | -1.432134 |
| 16               | 6                | 0              | -3.761528               | -1.452585 | -1.163724 |
| 17               | 6                | 0              | -4.202642               | -1.613192 | 0.151776  |
| 18               | 6                | 0              | -3.287562               | -1.820834 | 1.189088  |
| 19               | 6                | 0              | -1.924104               | -1.857925 | 0.900190  |
| 20               | 8                | 0              | -5.561691               | -1.509956 | 0.377229  |
| 21               | 8                | 0              | 2.684508                | 4.425907  | 0.083406  |
| 22               | 8                | 0              | 0.132407                | 3.905072  | 0.692272  |
| 23               | 8                | 0              | -0.870100               | 1.447666  | 1.477349  |
| 24               | 8                | 0              | -1.944804               | 4.071415  | -1.166710 |
| 25               | 8                | 0              | -3.061478               | 1.698099  | -0.296323 |
| 26               | 8                | 0              | -5.738736               | 1.351741  | 0.189998  |
| 27               | 1                | 0              | 5.770436                | 0.154636  | 0.012417  |
| 28               | 1                | 0              | 1.789818                | 1.848862  | -0.097281 |
| 29               | 1                | 0              | 3.756743                | 3.095462  | 0.016739  |
| 30               | 1                | 0              | 4.260842                | -3.131811 | 0.141975  |
| 31               | 1                | 0              | 0.236979                | -3.816336 | -0.117662 |
| 32               | 1                | 0              | 0.170636                | -1.504482 | -1.778020 |
| 33               | 1                | 0              | -2.045729               | -1.337148 | -2.453892 |

|    |   |   |           |           |           |
|----|---|---|-----------|-----------|-----------|
| 34 | 1 | 0 | -4.486564 | -1.298806 | -1.956327 |
| 35 | 1 | 0 | -3.636929 | -1.937039 | 2.211418  |
| 36 | 1 | 0 | -1.209876 | -2.014627 | 1.702338  |
| 37 | 1 | 0 | -5.779654 | -1.797110 | 1.276687  |
| 38 | 1 | 0 | -0.387936 | 0.737739  | 1.007662  |
| 39 | 1 | 0 | -0.522845 | 4.068459  | -0.020988 |
| 40 | 1 | 0 | 1.736812  | 4.233395  | 0.320702  |
| 41 | 1 | 0 | 2.975589  | 5.126599  | 0.681619  |
| 42 | 1 | 0 | -5.883330 | 0.391341  | 0.291610  |
| 43 | 1 | 0 | -6.126889 | 1.765495  | 0.972764  |
| 44 | 1 | 0 | -2.893833 | 0.925663  | -0.858758 |
| 45 | 1 | 0 | -4.021393 | 1.641829  | -0.069436 |
| 46 | 1 | 0 | -0.121934 | 3.022785  | 1.051239  |
| 47 | 1 | 0 | -1.726037 | 1.509328  | 1.005833  |
| 48 | 1 | 0 | -1.733651 | 4.027063  | -2.108475 |
| 49 | 1 | 0 | -2.407552 | 3.229940  | -0.950053 |

### INT1-6we

| Center Number | Atomic Number | Atomic Type | Coordinates (Angstroms) |           |           |
|---------------|---------------|-------------|-------------------------|-----------|-----------|
|               |               |             | X                       | Y         | Z         |
| 1             | 6             | 0           | -3.669759               | -1.740244 | 0.181704  |
| 2             | 6             | 0           | -2.382134               | -1.590672 | -0.437451 |
| 3             | 6             | 0           | -1.977726               | -0.258399 | -0.871297 |
| 4             | 6             | 0           | -2.782174               | 0.834985  | -0.451268 |
| 5             | 6             | 0           | -3.949967               | 0.646161  | 0.284444  |
| 6             | 6             | 0           | -4.434731               | -0.645492 | 0.568184  |
| 7             | 6             | 0           | -1.523283               | -2.754258 | -0.529685 |
| 8             | 8             | 0           | -1.998179               | -3.933407 | -0.529507 |
| 9             | 8             | 0           | -0.944689               | -0.054685 | -1.620685 |
| 10            | 8             | 0           | -4.678779               | 1.706711  | 0.730662  |
| 11            | 8             | 0           | -4.149211               | -2.978675 | 0.468763  |
| 12            | 6             | 0           | -0.048754               | -2.632130 | -0.498823 |
| 13            | 6             | 0           | 0.574017                | -1.713078 | 0.264106  |
| 14            | 6             | 0           | 2.007534                | -1.472424 | 0.413694  |
| 15            | 6             | 0           | 2.434862                | -0.530602 | 1.372133  |
| 16            | 6             | 0           | 3.776146                | -0.189747 | 1.511247  |
| 17            | 6             | 0           | 4.724010                | -0.782524 | 0.673145  |
| 18            | 6             | 0           | 4.334979                | -1.735689 | -0.277381 |
| 19            | 6             | 0           | 2.988859                | -2.074500 | -0.400173 |
| 20            | 8             | 0           | 6.022009                | -0.339710 | 0.790644  |
| 21            | 8             | 0           | 0.307488                | 2.060611  | -0.801012 |
| 22            | 8             | 0           | -2.875976               | 3.769364  | 0.980865  |
| 23            | 8             | 0           | -1.342993               | 4.153487  | -1.329262 |
| 24            | 8             | 0           | 2.951807                | 1.437407  | -1.510809 |
| 25            | 8             | 0           | -0.757764               | 2.002608  | 1.746665  |
| 26            | 8             | 0           | 5.292320                | 2.287802  | -0.213147 |
| 27            | 1             | 0           | -5.370138               | -0.786180 | 1.097392  |
| 28            | 1             | 0           | -2.488660               | 1.830645  | -0.757508 |
| 29            | 1             | 0           | -4.112074               | 2.520539  | 0.720834  |
| 30            | 1             | 0           | -3.483997               | -3.622001 | 0.095931  |
| 31            | 1             | 0           | 0.495567                | -3.402969 | -1.039160 |
| 32            | 1             | 0           | -0.054293               | -1.027191 | 0.827554  |
| 33            | 1             | 0           | 1.696526                | -0.040697 | 2.000530  |
| 34            | 1             | 0           | 4.094332                | 0.551728  | 2.236361  |
| 35            | 1             | 0           | 5.074861                | -2.188697 | -0.931198 |
| 36            | 1             | 0           | 2.700105                | -2.794643 | -1.158802 |
| 37            | 1             | 0           | 6.613695                | -0.846649 | 0.214694  |
| 38            | 1             | 0           | -0.159297               | 1.239767  | -1.183085 |
| 39            | 1             | 0           | -1.325861               | 1.225127  | 1.633891  |
| 40            | 1             | 0           | -2.161999               | 3.256580  | 1.417881  |
| 41            | 1             | 0           | -2.451600               | 4.047993  | 0.139141  |
| 42            | 1             | 0           | 5.780132                | 1.517776  | 0.131342  |
| 43            | 1             | 0           | 5.915193                | 2.767912  | -0.775133 |
| 44            | 1             | 0           | 2.965139                | 0.476807  | -1.390459 |
| 45            | 1             | 0           | 3.755404                | 1.762630  | -1.048521 |
| 46            | 1             | 0           | -0.263570               | 2.046495  | 0.891474  |
| 47            | 1             | 0           | 1.262997                | 1.949485  | -0.994042 |
| 48            | 1             | 0           | -0.878536               | 4.991940  | -1.448678 |
| 49            | 1             | 0           | -0.643468               | 3.463175  | -1.201338 |

### TS2-6we

| Center<br>Number | Atomic<br>Number | Atomic<br>Type | Coordinates (Angstroms) |           |           |
|------------------|------------------|----------------|-------------------------|-----------|-----------|
|                  |                  |                | X                       | Y         | Z         |
| 1                | 6                | 0              | 2.503042                | -0.938483 | 1.238274  |
| 2                | 6                | 0              | 1.762363                | -1.678420 | 0.301546  |
| 3                | 6                | 0              | 2.433505                | -2.202842 | -0.816041 |
| 4                | 6                | 0              | 3.799279                | -1.995509 | -0.997724 |
| 5                | 6                | 0              | 4.510920                | -1.251494 | -0.049918 |
| 6                | 6                | 0              | 3.870347                | -0.732040 | 1.077477  |
| 7                | 6                | 0              | 0.302210                | -1.822837 | 0.469674  |
| 8                | 6                | 0              | -0.394925               | -2.976769 | 0.016120  |
| 9                | 6                | 0              | -1.795744               | -2.932015 | -0.034297 |
| 10               | 8                | 0              | -2.543290               | -3.974179 | -0.222521 |
| 11               | 8                | 0              | 5.849827                | -0.956189 | -0.196661 |
| 12               | 6                | 0              | -2.440763               | -1.595524 | 0.017782  |
| 13               | 6                | 0              | -1.717478               | -0.396778 | -0.294082 |
| 14               | 6                | 0              | -2.408773               | 0.816735  | -0.444278 |
| 15               | 6                | 0              | -3.794266               | 0.879214  | -0.239215 |
| 16               | 6                | 0              | -4.529486               | -0.277466 | 0.045769  |
| 17               | 6                | 0              | -3.855956               | -1.498609 | 0.132157  |
| 18               | 8                | 0              | -0.388033               | -0.389923 | -0.474568 |
| 19               | 8                | 0              | -4.587160               | -2.626895 | 0.321228  |
| 20               | 8                | 0              | -4.468785               | 2.060094  | -0.314440 |
| 21               | 8                | 0              | 5.672918                | 1.898589  | -0.370648 |
| 22               | 8                | 0              | 0.655650                | 2.048787  | 0.037246  |
| 23               | 8                | 0              | -1.186150               | 2.842529  | 1.930462  |
| 24               | 8                | 0              | -2.719045               | 4.120098  | -0.059571 |
| 25               | 8                | 0              | 3.237783                | 2.663478  | 0.717980  |
| 26               | 1                | 0              | -5.606109               | -0.235645 | 0.168213  |
| 27               | 1                | 0              | -1.855782               | 1.709388  | -0.699766 |
| 28               | 1                | 0              | -3.834556               | 2.824911  | -0.321219 |
| 29               | 1                | 0              | -3.927168               | -3.380821 | 0.130267  |
| 30               | 1                | 0              | 0.133349                | -3.838337 | -0.378539 |
| 31               | 1                | 0              | -0.062855               | -1.359646 | 1.387628  |
| 32               | 1                | 0              | 1.999316                | -0.510289 | 2.100401  |
| 33               | 1                | 0              | 4.441537                | -0.159632 | 1.800555  |
| 34               | 1                | 0              | 4.304921                | -2.389121 | -1.875212 |
| 35               | 1                | 0              | 1.877406                | -2.758105 | -1.564367 |
| 36               | 1                | 0              | 6.217737                | -1.405474 | -0.972229 |
| 37               | 1                | 0              | 0.414027                | 1.106030  | -0.159577 |
| 38               | 1                | 0              | -1.706525               | 2.038069  | 2.068548  |
| 39               | 1                | 0              | -2.240779               | 3.807035  | 0.740401  |
| 40               | 1                | 0              | -2.019474               | 4.129177  | -0.750036 |
| 41               | 1                | 0              | 5.869919                | 0.942569  | -0.374491 |
| 42               | 1                | 0              | 5.833699                | 2.206928  | -1.272474 |
| 43               | 1                | 0              | 3.369487                | 2.565848  | 1.670205  |
| 44               | 1                | 0              | 4.070423                | 2.343816  | 0.302050  |
| 45               | 1                | 0              | -0.457496               | 2.560287  | 1.326257  |
| 46               | 1                | 0              | 1.617356                | 2.117697  | 0.237400  |
| 47               | 8                | 0              | -0.519470               | 3.764290  | -1.741730 |
| 48               | 1                | 0              | 0.041358                | 4.520202  | -1.959188 |
| 49               | 1                | 0              | 0.020601                | 3.176700  | -1.158514 |

## INT2-6we

| Center<br>Number | Atomic<br>Number | Atomic<br>Type | Coordinates (Angstroms) |           |           |
|------------------|------------------|----------------|-------------------------|-----------|-----------|
|                  |                  |                | X                       | Y         | Z         |
| 1                | 6                | 0              | -3.959300               | -1.435410 | -0.024279 |
| 2                | 6                | 0              | -2.551695               | -1.575460 | 0.048672  |
| 3                | 6                | 0              | -1.778937               | -0.406967 | -0.033737 |
| 4                | 6                | 0              | -2.348396               | 0.857835  | -0.158638 |
| 5                | 6                | 0              | -3.748792               | 0.968463  | -0.193685 |
| 6                | 6                | 0              | -4.558180               | -0.172454 | -0.125468 |
| 7                | 6                | 0              | -1.900646               | -2.911700 | 0.062847  |
| 8                | 8                | 0              | -2.679348               | -3.956947 | -0.138196 |
| 9                | 8                | 0              | -0.404721               | -0.490877 | -0.058608 |
| 10               | 8                | 0              | -4.360359               | 2.182472  | -0.291328 |
| 11               | 8                | 0              | -4.726924               | -2.551624 | -0.017173 |
| 12               | 6                | 0              | -0.541475               | -2.928622 | 0.247827  |
| 13               | 6                | 0              | 0.159984                | -1.665506 | 0.655249  |
| 14               | 6                | 0              | 1.642548                | -1.625280 | 0.374110  |
| 15               | 6                | 0              | 2.536670                | -1.128333 | 1.329940  |
| 16               | 6                | 0              | 3.899658                | -1.013576 | 1.052124  |

|    |   |   |           |           |           |
|----|---|---|-----------|-----------|-----------|
| 17 | 6 | 0 | 4.372378  | -1.387471 | -0.206466 |
| 18 | 6 | 0 | 3.501191  | -1.897302 | -1.174586 |
| 19 | 6 | 0 | 2.144347  | -2.015961 | -0.874948 |
| 20 | 8 | 0 | 5.717807  | -1.189825 | -0.455950 |
| 21 | 8 | 0 | 0.822068  | 2.029455  | 0.092705  |
| 22 | 8 | 0 | -2.524470 | 4.180545  | -0.216193 |
| 23 | 8 | 0 | -0.385660 | 3.517413  | -1.898443 |
| 24 | 8 | 0 | 3.410884  | 2.431097  | 0.811791  |
| 25 | 8 | 0 | -0.752684 | 3.484696  | 1.843224  |
| 26 | 8 | 0 | 5.730341  | 1.668167  | -0.489036 |
| 27 | 1 | 0 | -5.638298 | -0.082656 | -0.170795 |
| 28 | 1 | 0 | -1.721362 | 1.734591  | -0.217723 |
| 29 | 1 | 0 | -3.688676 | 2.914966  | -0.290896 |
| 30 | 1 | 0 | -4.023504 | -3.320618 | -0.070507 |
| 31 | 1 | 0 | 0.019994  | -3.857474 | 0.241009  |
| 32 | 1 | 0 | 0.001360  | -1.425427 | 1.721671  |
| 33 | 1 | 0 | 2.164712  | -0.815738 | 2.302123  |
| 34 | 1 | 0 | 4.593970  | -0.625828 | 1.790593  |
| 35 | 1 | 0 | 3.878006  | -2.185370 | -2.152351 |
| 36 | 1 | 0 | 1.460567  | -2.405210 | -1.622928 |
| 37 | 1 | 0 | 5.966744  | -1.580191 | -1.307123 |
| 38 | 1 | 0 | 0.554116  | 1.086904  | 0.053536  |
| 39 | 1 | 0 | -1.128712 | 2.898426  | 2.513313  |
| 40 | 1 | 0 | -2.004867 | 4.039653  | 0.606295  |
| 41 | 1 | 0 | -1.854832 | 4.063978  | -0.925820 |
| 42 | 1 | 0 | 5.863161  | 0.701507  | -0.534125 |
| 43 | 1 | 0 | 5.833103  | 1.992793  | -1.393723 |
| 44 | 1 | 0 | 3.538935  | 2.105241  | 1.712585  |
| 45 | 1 | 0 | 4.202543  | 2.129106  | 0.309024  |
| 46 | 1 | 0 | -0.144672 | 2.923125  | 1.307060  |
| 47 | 1 | 0 | 1.788782  | 2.075868  | 0.293348  |
| 48 | 1 | 0 | 0.182926  | 4.221993  | -2.235616 |
| 49 | 1 | 0 | 0.164416  | 3.000253  | -1.265055 |

### INT1-6wf

| Center Number | Atomic Number | Atomic Type | Coordinates (Angstroms) |           |           |
|---------------|---------------|-------------|-------------------------|-----------|-----------|
|               |               |             | X                       | Y         | Z         |
| 1             | 6             | 0           | -1.835864               | -1.622341 | -1.560071 |
| 2             | 6             | 0           | -1.307662               | -1.815327 | -0.267921 |
| 3             | 6             | 0           | -2.212235               | -2.092058 | 0.776858  |
| 4             | 6             | 0           | -3.583032               | -2.153560 | 0.547522  |
| 5             | 6             | 0           | -4.076995               | -1.938186 | -0.745188 |
| 6             | 6             | 0           | -3.204064               | -1.685385 | -1.805543 |
| 7             | 6             | 0           | 0.130448                | -1.653875 | -0.066150 |
| 8             | 6             | 0           | 0.838290                | -1.878701 | 1.057825  |
| 9             | 6             | 0           | 2.306299                | -1.740068 | 1.131670  |
| 10            | 8             | 0           | 2.904055                | -2.621557 | 1.832185  |
| 11            | 8             | 0           | -5.425904               | -1.905434 | -1.025800 |
| 12            | 6             | 0           | 3.052690                | -0.740459 | 0.391411  |
| 13            | 6             | 0           | 2.484357                | 0.531314  | -0.061268 |
| 14            | 6             | 0           | 3.283089                | 1.330771  | -0.935039 |
| 15            | 6             | 0           | 4.582904                | 0.967351  | -1.256559 |
| 16            | 6             | 0           | 5.186328                | -0.191573 | -0.737487 |
| 17            | 6             | 0           | 4.434617                | -1.009628 | 0.095795  |
| 18            | 8             | 0           | 1.334522                | 0.947048  | 0.332228  |
| 19            | 8             | 0           | 5.044720                | -2.109795 | 0.604913  |
| 20            | 8             | 0           | 5.369360                | 1.736342  | -2.076014 |
| 21            | 8             | 0           | -0.321108               | 2.581359  | -0.862072 |
| 22            | 8             | 0           | -0.393780               | 4.621923  | 0.877667  |
| 23            | 8             | 0           | -2.887785               | 1.551862  | -0.127771 |
| 24            | 8             | 0           | -1.934868               | 0.760542  | 2.436448  |
| 25            | 8             | 0           | -2.654365               | 3.420665  | 1.971585  |
| 26            | 8             | 0           | -5.277347               | 0.947665  | -1.462417 |
| 27            | 1             | 0           | 6.217966                | -0.433337 | -0.964286 |
| 28            | 1             | 0           | 2.861426                | 2.264650  | -1.296913 |
| 29            | 1             | 0           | 4.874512                | 2.513665  | -2.373232 |
| 30            | 1             | 0           | 4.377482                | -2.518997 | 1.231160  |
| 31            | 1             | 0           | 0.382388                | -2.309537 | 1.945940  |
| 32            | 1             | 0           | 0.671516                | -1.283358 | -0.933397 |
| 33            | 1             | 0           | -1.161380               | -1.401322 | -2.382714 |
| 34            | 1             | 0           | -3.605016               | -1.517081 | -2.799524 |
| 35            | 1             | 0           | -4.268499               | -2.339046 | 1.369713  |

|    |   |   |           |           |           |
|----|---|---|-----------|-----------|-----------|
| 36 | 1 | 0 | -1.848225 | -2.229678 | 1.789172  |
| 37 | 1 | 0 | -5.945154 | -2.163843 | -0.249607 |
| 38 | 1 | 0 | 0.352119  | 1.951970  | -0.455990 |
| 39 | 1 | 0 | -0.318393 | 3.919171  | 0.172528  |
| 40 | 1 | 0 | -0.514542 | 5.461389  | 0.415416  |
| 41 | 1 | 0 | -1.195773 | 2.162365  | -0.740050 |
| 42 | 1 | 0 | -3.698832 | 1.262701  | -0.597854 |
| 43 | 1 | 0 | -2.679336 | 0.883987  | 0.553327  |
| 44 | 1 | 0 | -6.010298 | 1.501500  | -1.161967 |
| 45 | 1 | 0 | -5.580537 | 0.026327  | -1.369073 |
| 46 | 1 | 0 | -1.871083 | 3.950000  | 1.700315  |
| 47 | 1 | 0 | -2.938090 | 2.982151  | 1.143986  |
| 48 | 1 | 0 | -2.129776 | 1.718757  | 2.534925  |
| 49 | 1 | 0 | -2.507495 | 0.302967  | 3.065374  |

### TS2-6wf

| Center<br>Number | Atomic<br>Number | Atomic<br>Type | Coordinates (Angstroms) |           |           |
|------------------|------------------|----------------|-------------------------|-----------|-----------|
|                  |                  |                | X                       | Y         | Z         |
| 1                | 6                | 0              | -1.810675               | -0.178461 | -0.238739 |
| 2                | 6                | 0              | -2.763535               | -1.233047 | -0.053035 |
| 3                | 6                | 0              | -4.131810               | -0.864423 | 0.074129  |
| 4                | 6                | 0              | -4.541629               | 0.472036  | 0.151363  |
| 5                | 6                | 0              | -3.575335               | 1.471075  | -0.014549 |
| 6                | 6                | 0              | -2.249419               | 1.152227  | -0.302123 |
| 7                | 6                | 0              | -2.383707               | -2.658423 | -0.230014 |
| 8                | 8                | 0              | -3.307520               | -3.506083 | -0.552756 |
| 9                | 8                | 0              | -5.077401               | -1.838339 | 0.138640  |
| 10               | 8                | 0              | -3.945461               | 2.784423  | 0.128619  |
| 11               | 8                | 0              | -0.496462               | -0.391643 | -0.339499 |
| 12               | 6                | 0              | -1.016580               | -2.977078 | -0.143157 |
| 13               | 6                | 0              | -0.152329               | -2.031528 | 0.470864  |
| 14               | 6                | 0              | 1.320346                | -2.082216 | 0.386880  |
| 15               | 6                | 0              | 1.990912                | -2.597639 | -0.734220 |
| 16               | 6                | 0              | 3.372769                | -2.466863 | -0.868454 |
| 17               | 6                | 0              | 4.098393                | -1.803274 | 0.127749  |
| 18               | 6                | 0              | 3.459864                | -1.316964 | 1.271520  |
| 19               | 6                | 0              | 2.080358                | -1.452750 | 1.387682  |
| 20               | 8                | 0              | 5.449683                | -1.554110 | 0.021827  |
| 21               | 8                | 0              | 0.466626                | 1.632833  | 1.358808  |
| 22               | 8                | 0              | 0.787363                | 4.540652  | -0.681227 |
| 23               | 8                | 0              | 2.769207                | 2.399940  | -0.021843 |
| 24               | 8                | 0              | 5.352185                | 1.335920  | 0.298586  |
| 25               | 8                | 0              | -1.263068               | 3.757532  | 1.092620  |
| 26               | 1                | 0              | -5.582368               | 0.719290  | 0.328600  |
| 27               | 1                | 0              | -1.522009               | 1.931949  | -0.477511 |
| 28               | 1                | 0              | -3.137245               | 3.303560  | 0.310797  |
| 29               | 1                | 0              | -4.580442               | -2.681583 | -0.133760 |
| 30               | 1                | 0              | -0.634455               | -3.866851 | -0.633228 |
| 31               | 1                | 0              | -0.500039               | -1.604021 | 1.412186  |
| 32               | 1                | 0              | 1.577888                | -1.033506 | 2.254097  |
| 33               | 1                | 0              | 4.041256                | -0.809846 | 2.034406  |
| 34               | 1                | 0              | 3.878708                | -2.846318 | -1.751996 |
| 35               | 1                | 0              | 1.424431                | -3.071202 | -1.529730 |
| 36               | 1                | 0              | 5.805868                | -1.926991 | -0.798182 |
| 37               | 1                | 0              | 0.185374                | 0.883015  | 0.785944  |
| 38               | 1                | 0              | -0.708796               | 2.959066  | 1.302163  |
| 39               | 1                | 0              | -1.312716               | 4.279319  | 1.905059  |
| 40               | 1                | 0              | 1.340933                | 1.894152  | 0.994964  |
| 41               | 1                | 0              | 3.656477                | 1.997018  | 0.087696  |
| 42               | 1                | 0              | 2.467921                | 2.196614  | -0.931044 |
| 43               | 1                | 0              | 6.034636                | 1.810652  | -0.194196 |
| 44               | 1                | 0              | 5.523741                | 0.387798  | 0.148092  |
| 45               | 1                | 0              | 0.017773                | 4.394865  | -0.090071 |
| 46               | 1                | 0              | 1.555939                | 4.222990  | -0.178228 |
| 47               | 8                | 0              | 1.238446                | 2.389024  | -2.366888 |
| 48               | 1                | 0              | 0.915112                | 3.216172  | -1.942459 |
| 49               | 1                | 0              | 1.577472                | 2.646653  | -3.234056 |

### INT2-6wf



| Center<br>Number | Atomic<br>Number | Atomic<br>Type | Coordinates (Angstroms) |           |           |
|------------------|------------------|----------------|-------------------------|-----------|-----------|
|                  |                  |                | X                       | Y         | Z         |
| 1                | 6                | 0              | -2.195133               | -1.497789 | -1.461006 |
| 2                | 6                | 0              | -1.328928               | -1.955465 | -0.459639 |
| 3                | 6                | 0              | -1.873143               | -2.345437 | 0.770434  |
| 4                | 6                | 0              | -3.244332               | -2.246537 | 1.013886  |
| 5                | 6                | 0              | -4.081875               | -1.746256 | 0.011653  |
| 6                | 6                | 0              | -3.567376               | -1.395349 | -1.238000 |
| 7                | 6                | 0              | 0.162746                | -1.839871 | -0.657036 |
| 8                | 6                | 0              | 1.028821                | -2.918901 | -0.075879 |
| 9                | 6                | 0              | 2.363055                | -2.660606 | 0.128006  |
| 10               | 8                | 0              | 3.297735                | -3.532471 | 0.448079  |
| 11               | 8                | 0              | -5.431815               | -1.529732 | 0.209693  |
| 12               | 6                | 0              | 2.785113                | -1.237591 | 0.022850  |
| 13               | 6                | 0              | 1.821791                | -0.220267 | -0.009321 |
| 14               | 6                | 0              | 2.159727                | 1.126657  | 0.049582  |
| 15               | 6                | 0              | 3.510857                | 1.482842  | 0.029781  |
| 16               | 6                | 0              | 4.514886                | 0.509195  | 0.069189  |
| 17               | 6                | 0              | 4.143679                | -0.845401 | 0.103877  |
| 18               | 8                | 0              | 0.485442                | -0.516571 | -0.061380 |
| 19               | 8                | 0              | 5.091084                | -1.807462 | 0.217089  |
| 20               | 8                | 0              | 3.866049                | 2.806940  | -0.041890 |
| 21               | 8                | 0              | -0.589827               | 1.771947  | -1.599180 |
| 22               | 8                | 0              | 1.188493                | 3.868955  | -1.129884 |
| 23               | 8                | 0              | -2.709917               | 2.299900  | 0.105062  |
| 24               | 8                | 0              | -1.054293               | 1.984152  | 2.339832  |
| 25               | 8                | 0              | -0.713475               | 4.339258  | 0.913640  |
| 26               | 8                | 0              | -5.331995               | 1.345029  | -0.167595 |
| 27               | 1                | 0              | 5.562486                | 0.790077  | 0.077019  |
| 28               | 1                | 0              | 1.384036                | 1.874987  | 0.078638  |
| 29               | 1                | 0              | 3.076661                | 3.321652  | -0.297585 |
| 30               | 1                | 0              | 4.530842                | -2.675858 | 0.336122  |
| 31               | 1                | 0              | 0.626043                | -3.923099 | 0.012278  |
| 32               | 1                | 0              | 0.357881                | -1.694954 | -1.735028 |
| 33               | 1                | 0              | -1.789362               | -1.187088 | -2.420024 |
| 34               | 1                | 0              | -4.235697               | -1.018872 | -2.005586 |
| 35               | 1                | 0              | -3.654354               | -2.527509 | 1.980319  |
| 36               | 1                | 0              | -1.212289               | -2.700505 | 1.555397  |
| 37               | 1                | 0              | -5.701837               | -1.833934 | 1.088767  |
| 38               | 1                | 0              | -0.266665               | 0.946094  | -1.193163 |
| 39               | 1                | 0              | 0.617162                | 3.129973  | -1.457449 |
| 40               | 1                | 0              | 1.221480                | 4.528595  | -1.835853 |
| 41               | 1                | 0              | -1.414668               | 1.968097  | -1.098134 |
| 42               | 1                | 0              | -3.618188               | 1.940843  | 0.009514  |
| 43               | 1                | 0              | -2.353237               | 1.968677  | 0.955005  |
| 44               | 1                | 0              | -5.987575               | 1.840543  | 0.340992  |
| 45               | 1                | 0              | -5.511411               | 0.402657  | 0.009809  |
| 46               | 1                | 0              | 0.007065                | 4.299964  | 0.249963  |
| 47               | 1                | 0              | -1.514117               | 4.067425  | 0.433451  |
| 48               | 1                | 0              | -0.750023               | 2.859782  | 2.010349  |
| 49               | 1                | 0              | -1.353392               | 2.127534  | 3.247211  |

### INT1-7w

| Center<br>Number | Atomic<br>Number | Atomic<br>Type | Coordinates (Angstroms) |           |           |
|------------------|------------------|----------------|-------------------------|-----------|-----------|
|                  |                  |                | X                       | Y         | Z         |
| 1                | 6                | 0              | -3.817485               | -1.404261 | 0.224760  |
| 2                | 6                | 0              | -2.499180               | -1.555291 | -0.333458 |
| 3                | 6                | 0              | -1.996321               | -0.492262 | -1.206784 |
| 4                | 6                | 0              | -2.826305               | 0.652793  | -1.375642 |
| 5                | 6                | 0              | -4.020599               | 0.803453  | -0.694124 |
| 6                | 6                | 0              | -4.550373               | -0.226181 | 0.105048  |
| 7                | 6                | 0              | -1.752631               | -2.758110 | -0.000051 |
| 8                | 8                | 0              | -2.346667               | -3.810547 | 0.400475  |
| 9                | 8                | 0              | -0.864887               | -0.536332 | -1.823496 |
| 10               | 8                | 0              | -4.732979               | 1.972740  | -0.768512 |
| 11               | 8                | 0              | -4.376600               | -2.409426 | 0.944376  |
| 12               | 6                | 0              | -0.279038               | -2.810947 | -0.032843 |
| 13               | 6                | 0              | 0.478982                | -1.774870 | 0.375426  |
| 14               | 6                | 0              | 1.935768                | -1.662395 | 0.378786  |
| 15               | 6                | 0              | 2.516040                | -0.539512 | 1.002622  |
| 16               | 6                | 0              | 3.881739                | -0.292458 | 0.927144  |

|    |   |   |           |           |           |
|----|---|---|-----------|-----------|-----------|
| 17 | 6 | 0 | 4.696578  | -1.166763 | 0.204829  |
| 18 | 6 | 0 | 4.157675  | -2.313918 | -0.391942 |
| 19 | 6 | 0 | 2.788905  | -2.555283 | -0.300270 |
| 20 | 8 | 0 | 6.019158  | -0.806525 | 0.066545  |
| 21 | 8 | 0 | 0.053564  | 1.853138  | -1.060283 |
| 22 | 8 | 0 | 2.697769  | 2.650414  | -0.780160 |
| 23 | 8 | 0 | -0.095404 | 1.508323  | 1.677902  |
| 24 | 8 | 0 | 2.118256  | 3.049151  | 1.936010  |
| 25 | 8 | 0 | -2.148378 | 3.522027  | -0.580101 |
| 26 | 8 | 0 | -2.765851 | 2.321378  | 1.886586  |
| 27 | 8 | 0 | 5.377040  | 1.743282  | -1.261918 |
| 28 | 1 | 0 | -5.515367 | -0.125052 | 0.587863  |
| 29 | 1 | 0 | -2.468660 | 1.439997  | -2.027778 |
| 30 | 1 | 0 | -4.136313 | 2.672710  | -1.087460 |
| 31 | 1 | 0 | -3.750878 | -3.185885 | 0.851985  |
| 32 | 1 | 0 | 0.147272  | -3.774287 | -0.303467 |
| 33 | 1 | 0 | -0.037000 | -0.878796 | 0.710344  |
| 34 | 1 | 0 | 1.874908  | 0.161650  | 1.525177  |
| 35 | 1 | 0 | 4.317758  | 0.589095  | 1.385403  |
| 36 | 1 | 0 | 4.797954  | -2.990911 | -0.950995 |
| 37 | 1 | 0 | 2.378134  | -3.426519 | -0.800734 |
| 38 | 1 | 0 | 6.510130  | -1.476379 | -0.431993 |
| 39 | 1 | 0 | -0.168653 | 0.961919  | -1.459844 |
| 40 | 1 | 0 | -1.332803 | 3.024832  | -0.826563 |
| 41 | 1 | 0 | -1.904169 | 4.456741  | -0.557269 |
| 42 | 1 | 0 | 1.017973  | 2.024416  | -1.142065 |
| 43 | 1 | 0 | 3.565889  | 2.235555  | -0.950841 |
| 44 | 1 | 0 | 2.638433  | 2.779852  | 0.191166  |
| 45 | 1 | 0 | 5.667004  | 1.770323  | -2.183327 |
| 46 | 1 | 0 | 5.741312  | 0.918714  | -0.893886 |
| 47 | 1 | 0 | -0.090948 | 1.566376  | 0.692712  |
| 48 | 1 | 0 | -1.006000 | 1.768373  | 1.932526  |
| 49 | 1 | 0 | 1.281866  | 2.521615  | 1.994062  |
| 50 | 1 | 0 | 2.698545  | 2.717770  | 2.633452  |
| 51 | 1 | 0 | -2.666114 | 2.806060  | 1.037558  |
| 52 | 1 | 0 | -3.322956 | 1.556881  | 1.673565  |

## TS2-7w

| Center<br>Number | Atomic<br>Number | Atomic<br>Type | Coordinates (Angstroms) |           |           |
|------------------|------------------|----------------|-------------------------|-----------|-----------|
|                  |                  |                | X                       | Y         | Z         |
| 1                | 6                | 0              | 2.359682                | -0.712896 | 0.914665  |
| 2                | 6                | 0              | 1.587586                | -1.674457 | 0.241367  |
| 3                | 6                | 0              | 2.234371                | -2.561062 | -0.634454 |
| 4                | 6                | 0              | 3.609329                | -2.477612 | -0.852847 |
| 5                | 6                | 0              | 4.351504                | -1.498530 | -0.181345 |
| 6                | 6                | 0              | 3.734409                | -0.629557 | 0.721968  |
| 7                | 6                | 0              | 0.121357                | -1.662561 | 0.411130  |
| 8                | 6                | 0              | -0.661302               | -2.854032 | 0.451421  |
| 9                | 6                | 0              | -2.053809               | -2.705701 | 0.420117  |
| 10               | 8                | 0              | -2.905417               | -3.650313 | 0.666100  |
| 11               | 8                | 0              | 5.698901                | -1.306308 | -0.398241 |
| 12               | 6                | 0              | -2.576043               | -1.386071 | -0.030063 |
| 13               | 6                | 0              | -1.782629               | -0.505977 | -0.834118 |
| 14               | 6                | 0              | -2.376285               | 0.619532  | -1.425145 |
| 15               | 6                | 0              | -3.691423               | 0.965840  | -1.110922 |
| 16               | 6                | 0              | -4.497764               | 0.132284  | -0.328469 |
| 17               | 6                | 0              | -3.946827               | -1.065232 | 0.148275  |
| 18               | 8                | 0              | -0.472791               | -0.705288 | -1.040252 |
| 19               | 8                | 0              | -4.752940               | -1.933594 | 0.808934  |
| 20               | 8                | 0              | -4.214279               | 2.159646  | -1.540891 |
| 21               | 8                | 0              | 0.469945                | 1.851201  | -0.801585 |
| 22               | 8                | 0              | -0.024425               | 1.639655  | 1.918898  |
| 23               | 8                | 0              | 3.035665                | 2.642154  | -0.355085 |
| 24               | 8                | 0              | 2.408905                | 2.774858  | 2.377382  |
| 25               | 8                | 0              | 5.570968                | 1.526207  | -0.995463 |
| 26               | 8                | 0              | -1.735378               | 3.550778  | -0.874273 |
| 27               | 1                | 0              | -5.531488               | 0.385495  | -0.121938 |
| 28               | 1                | 0              | -1.775417               | 1.268844  | -2.048053 |
| 29               | 1                | 0              | -3.472665               | 2.777492  | -1.684545 |
| 30               | 1                | 0              | -4.198327               | -2.784468 | 0.871551  |
| 31               | 1                | 0              | -0.204974               | -3.838187 | 0.426524  |
| 32               | 1                | 0              | -0.203675               | -0.854499 | 1.066849  |
| 33               | 1                | 0              | 1.870966                | -0.010833 | 1.582223  |

|    |   |   |           |           |           |
|----|---|---|-----------|-----------|-----------|
| 34 | 1 | 0 | 4.328050  | 0.119090  | 1.235566  |
| 35 | 1 | 0 | 4.097412  | -3.149668 | -1.553237 |
| 36 | 1 | 0 | 1.652591  | -3.302146 | -1.173795 |
| 37 | 1 | 0 | 6.042022  | -1.945914 | -1.039598 |
| 38 | 1 | 0 | 0.310211  | 0.900180  | -1.015524 |
| 39 | 1 | 0 | -0.894095 | 3.038866  | -0.931645 |
| 40 | 1 | 0 | -1.496736 | 4.485781  | -0.926191 |
| 41 | 1 | 0 | 1.441534  | 2.030195  | -0.784466 |
| 42 | 1 | 0 | 3.869831  | 2.179431  | -0.572977 |
| 43 | 1 | 0 | 2.969081  | 2.669518  | 0.624150  |
| 44 | 1 | 0 | 5.908975  | 1.781806  | -1.863858 |
| 45 | 1 | 0 | 5.764157  | 0.575462  | -0.900781 |
| 46 | 1 | 0 | 0.104611  | 1.687575  | 0.943779  |
| 47 | 1 | 0 | -0.943823 | 1.952239  | 2.045009  |
| 48 | 1 | 0 | 1.491393  | 2.407467  | 2.371392  |
| 49 | 1 | 0 | 2.906084  | 2.249619  | 3.017877  |
| 50 | 8 | 0 | -2.683507 | 2.541530  | 1.594061  |
| 51 | 1 | 0 | -2.446377 | 2.969543  | 0.743106  |
| 52 | 1 | 0 | -3.227449 | 1.779093  | 1.342432  |

## INT2-7w

| Center<br>Number | Atomic<br>Number | Atomic<br>Type | Coordinates (Angstroms) |           |           |
|------------------|------------------|----------------|-------------------------|-----------|-----------|
|                  |                  |                | X                       | Y         | Z         |
| 1                | 6                | 0              | -4.041760               | -1.042065 | 0.058606  |
| 2                | 6                | 0              | -2.665862               | -1.366107 | -0.008209 |
| 3                | 6                | 0              | -1.822931               | -0.492768 | -0.714915 |
| 4                | 6                | 0              | -2.303038               | 0.651086  | -1.345575 |
| 5                | 6                | 0              | -3.647262               | 0.998705  | -1.169017 |
| 6                | 6                | 0              | -4.528803               | 0.162325  | -0.476004 |
| 7                | 6                | 0              | -2.138199               | -2.651358 | 0.530882  |
| 8                | 8                | 0              | -3.027197               | -3.566905 | 0.854963  |
| 9                | 8                | 0              | -0.479414               | -0.762022 | -0.812053 |
| 10               | 8                | 0              | -4.120150               | 2.193835  | -1.652314 |
| 11               | 8                | 0              | -4.887357               | -1.911509 | 0.657979  |
| 12               | 6                | 0              | -0.769567               | -2.752439 | 0.599011  |
| 13               | 6                | 0              | 0.018613                | -1.492699 | 0.397467  |
| 14               | 6                | 0              | 1.505532                | -1.617939 | 0.210564  |
| 15               | 6                | 0              | 2.360924                | -0.776740 | 0.934150  |
| 16               | 6                | 0              | 3.735561                | -0.779086 | 0.707682  |
| 17               | 6                | 0              | 4.263165                | -1.620239 | -0.273299 |
| 18               | 6                | 0              | 3.434023                | -2.489738 | -0.990675 |
| 19               | 6                | 0              | 2.060475                | -2.485178 | -0.739790 |
| 20               | 8                | 0              | 5.618006                | -1.511980 | -0.517502 |
| 21               | 8                | 0              | 0.601710                | 1.875024  | -0.772238 |
| 22               | 8                | 0              | 3.169833                | 2.568830  | -0.311384 |
| 23               | 8                | 0              | 0.080937                | 1.766641  | 1.967735  |
| 24               | 8                | 0              | 2.596865                | 2.706183  | 2.428502  |
| 25               | 8                | 0              | -1.625425               | 3.589554  | -0.913615 |
| 26               | 8                | 0              | -2.590078               | 2.625926  | 1.564187  |
| 27               | 8                | 0              | 5.626699                | 1.339102  | -1.016824 |
| 28               | 1                | 0              | -5.573100               | 0.431551  | -0.361964 |
| 29               | 1                | 0              | -1.634339               | 1.288111  | -1.906776 |
| 30               | 1                | 0              | -3.363613               | 2.802449  | -1.747844 |
| 31               | 1                | 0              | -4.285120               | -2.741464 | 0.836129  |
| 32               | 1                | 0              | -0.271104               | -3.654327 | 0.939211  |
| 33               | 1                | 0              | -0.158799               | -0.771003 | 1.210090  |
| 34               | 1                | 0              | 1.942344                | -0.089692 | 1.663126  |
| 35               | 1                | 0              | 4.395064                | -0.114738 | 1.256238  |
| 36               | 1                | 0              | 3.854218                | -3.147398 | -1.746930 |
| 37               | 1                | 0              | 1.409481                | -3.145800 | -1.304559 |
| 38               | 1                | 0              | 5.893901                | -2.132319 | -1.208102 |
| 39               | 1                | 0              | 0.457035                | 0.927298  | -0.961759 |
| 40               | 1                | 0              | -0.774971               | 3.095385  | -0.948745 |
| 41               | 1                | 0              | -1.405261               | 4.527851  | -0.986672 |
| 42               | 1                | 0              | 1.578180                | 2.045147  | -0.736446 |
| 43               | 1                | 0              | 3.974660                | 2.065857  | -0.551891 |
| 44               | 1                | 0              | 3.122194                | 2.585829  | 0.669527  |
| 45               | 1                | 0              | 5.966885                | 1.598788  | -1.883136 |
| 46               | 1                | 0              | 5.768591                | 0.376727  | -0.949526 |
| 47               | 1                | 0              | 0.214782                | 1.775944  | 0.994143  |
| 48               | 1                | 0              | -0.839855               | 2.079460  | 2.077216  |
| 49               | 1                | 0              | 1.652933                | 2.416161  | 2.426539  |
| 50               | 1                | 0              | 3.057162                | 2.122305  | 3.045430  |

|    |   |   |           |          |          |
|----|---|---|-----------|----------|----------|
| 51 | 1 | 0 | -2.346016 | 3.034103 | 0.705780 |
| 52 | 1 | 0 | -3.115922 | 1.847774 | 1.326160 |

### INT1-7wb

| Center Number | Atomic Number | Atomic Type | Coordinates (Angstroms) |           |           |
|---------------|---------------|-------------|-------------------------|-----------|-----------|
|               |               |             | X                       | Y         | Z         |
| 1             | 6             | 0           | -2.773659               | -2.432568 | -0.201276 |
| 2             | 6             | 0           | -1.539021               | -1.781670 | -0.577147 |
| 3             | 6             | 0           | -1.580570               | -0.333013 | -0.746643 |
| 4             | 6             | 0           | -2.766109               | 0.350433  | -0.387669 |
| 5             | 6             | 0           | -3.893262               | -0.322703 | 0.071881  |
| 6             | 6             | 0           | -3.914374               | -1.726149 | 0.153663  |
| 7             | 6             | 0           | -0.372196               | -2.617406 | -0.838632 |
| 8             | 8             | 0           | -0.518995               | -3.870088 | -1.046945 |
| 9             | 8             | 0           | -0.579623               | 0.359400  | -1.214748 |
| 10            | 8             | 0           | -5.020644               | 0.342956  | 0.437210  |
| 11            | 8             | 0           | -2.845190               | -3.786764 | -0.136046 |
| 12            | 6             | 0           | 1.025906                | -2.160666 | -0.836550 |
| 13            | 6             | 0           | 1.534190                | -1.172882 | -0.068439 |
| 14            | 6             | 0           | 2.934173                | -0.760922 | 0.011378  |
| 15            | 6             | 0           | 3.236372                | 0.499309  | 0.569518  |
| 16            | 6             | 0           | 4.542580                | 0.977233  | 0.626167  |
| 17            | 6             | 0           | 5.588039                | 0.187093  | 0.134011  |
| 18            | 6             | 0           | 5.317897                | -1.077473 | -0.412487 |
| 19            | 6             | 0           | 4.006803                | -1.539306 | -0.471937 |
| 20            | 8             | 0           | 6.856561                | 0.695049  | 0.216184  |
| 21            | 8             | 0           | -0.772046               | 2.795650  | -2.380059 |
| 22            | 8             | 0           | -2.096869               | 3.846273  | -0.103648 |
| 23            | 8             | 0           | -4.701126               | 3.053296  | 0.335966  |
| 24            | 8             | 0           | -0.045027               | 2.165820  | 0.780219  |
| 25            | 8             | 0           | 0.536849                | 0.681618  | 3.056933  |
| 26            | 8             | 0           | -1.190176               | -1.418623 | 2.593298  |
| 27            | 1             | 0           | -4.807105               | -2.253892 | 0.469409  |
| 28            | 1             | 0           | -2.776383               | 1.426237  | -0.495026 |
| 29            | 1             | 0           | -4.884923               | 1.324026  | 0.367328  |
| 30            | 1             | 0           | -1.974811               | -4.116876 | -0.514142 |
| 31            | 1             | 0           | 1.679728                | -2.790541 | -1.435602 |
| 32            | 1             | 0           | 0.853150                | -0.588988 | 0.540022  |
| 33            | 1             | 0           | 2.430305                | 1.124190  | 0.938203  |
| 34            | 1             | 0           | 4.761614                | 1.953924  | 1.045377  |
| 35            | 1             | 0           | 6.132500                | -1.693201 | -0.782985 |
| 36            | 1             | 0           | 3.819265                | -2.523290 | -0.889021 |
| 37            | 1             | 0           | 7.495900                | 0.072819  | -0.162532 |
| 38            | 1             | 0           | -0.803685               | 1.874881  | -2.002949 |
| 39            | 1             | 0           | -1.475637               | 3.330033  | 0.454244  |
| 40            | 1             | 0           | -3.769542               | 3.344418  | 0.166532  |
| 41            | 1             | 0           | -5.228051               | 3.436965  | -0.379569 |
| 42            | 1             | 0           | 0.179978                | 1.682308  | 1.607255  |
| 43            | 1             | 0           | -0.232955               | 1.471787  | 0.096747  |
| 44            | 1             | 0           | -2.104872               | -1.145698 | 2.759377  |
| 45            | 1             | 0           | -1.158221               | -1.569244 | 1.630160  |
| 46            | 1             | 0           | -1.788479               | 3.612345  | -1.007467 |
| 47            | 1             | 0           | 0.105828                | 3.118927  | -2.097689 |
| 48            | 1             | 0           | -0.072362               | -0.083104 | 2.922587  |
| 49            | 1             | 0           | 1.428424                | 0.316670  | 2.961297  |
| 50            | 8             | 0           | 1.694275                | 3.427762  | -0.918756 |
| 51            | 1             | 0           | 1.171657                | 3.013227  | -0.191183 |
| 52            | 1             | 0           | 2.394147                | 2.787414  | -1.112266 |

### TS2-7wb

| Center Number | Atomic Number | Atomic Type | Coordinates (Angstroms) |           |           |
|---------------|---------------|-------------|-------------------------|-----------|-----------|
|               |               |             | X                       | Y         | Z         |
| 1             | 6             | 0           | -3.346138               | -1.720501 | -0.318991 |
| 2             | 6             | 0           | -1.928120               | -1.594133 | -0.369330 |
| 3             | 6             | 0           | -1.392122               | -0.269519 | -0.461680 |
| 4             | 6             | 0           | -2.243384               | 0.841022  | -0.463259 |
| 5             | 6             | 0           | -3.627860               | 0.668038  | -0.342381 |
| 6             | 6             | 0           | -4.190992               | -0.612194 | -0.262639 |

|    |   |   |           |           |           |
|----|---|---|-----------|-----------|-----------|
| 7  | 6 | 0 | -1.081144 | -2.785531 | -0.629941 |
| 8  | 8 | 0 | -1.663542 | -3.880429 | -1.033430 |
| 9  | 8 | 0 | -0.067074 | -0.040389 | -0.551871 |
| 10 | 8 | 0 | -4.470778 | 1.735742  | -0.291777 |
| 11 | 8 | 0 | -3.902458 | -2.960859 | -0.338410 |
| 12 | 6 | 0 | 0.302061  | -2.632369 | -0.539567 |
| 13 | 6 | 0 | 0.833041  | -1.486462 | 0.133197  |
| 14 | 6 | 0 | 2.262560  | -1.137077 | 0.017091  |
| 15 | 6 | 0 | 2.970950  | -0.689084 | 1.144508  |
| 16 | 6 | 0 | 4.322413  | -0.359071 | 1.064760  |
| 17 | 6 | 0 | 4.982648  | -0.450099 | -0.167885 |
| 18 | 6 | 0 | 4.288036  | -0.873146 | -1.311523 |
| 19 | 6 | 0 | 2.942161  | -1.216847 | -1.210821 |
| 20 | 8 | 0 | 6.306810  | -0.104989 | -0.200587 |
| 21 | 8 | 0 | 0.894183  | 2.068003  | -2.151071 |
| 22 | 8 | 0 | -0.436525 | 3.917439  | -0.417406 |
| 23 | 8 | 0 | -3.178360 | 4.132646  | -0.458152 |
| 24 | 8 | 0 | 0.662228  | 1.929248  | 1.235890  |
| 25 | 8 | 0 | 0.080424  | 0.627796  | 3.611987  |
| 26 | 8 | 0 | -1.859724 | -1.203390 | 2.838559  |
| 27 | 1 | 0 | -5.265854 | -0.744119 | -0.206363 |
| 28 | 1 | 0 | -1.813651 | 1.830562  | -0.521744 |
| 29 | 1 | 0 | -3.968715 | 2.587947  | -0.373478 |
| 30 | 1 | 0 | -3.137276 | -3.569748 | -0.622010 |
| 31 | 1 | 0 | 0.960982  | -3.332051 | -1.043663 |
| 32 | 1 | 0 | 0.428009  | -1.265044 | 1.120260  |
| 33 | 1 | 0 | 2.458173  | -0.599719 | 2.097181  |
| 34 | 1 | 0 | 4.868270  | -0.021447 | 1.939512  |
| 35 | 1 | 0 | 4.800910  | -0.929082 | -2.267124 |
| 36 | 1 | 0 | 2.407594  | -1.535856 | -2.099964 |
| 37 | 1 | 0 | 6.655709  | -0.195765 | -1.100321 |
| 38 | 1 | 0 | 0.505561  | 1.280465  | -1.711469 |
| 39 | 1 | 0 | -0.148194 | 3.378607  | 0.349999  |
| 40 | 1 | 0 | -2.189978 | 4.070163  | -0.468618 |
| 41 | 1 | 0 | -3.421178 | 4.594791  | -1.273148 |
| 42 | 1 | 0 | 0.516012  | 1.542661  | 2.129450  |
| 43 | 1 | 0 | 0.393364  | 1.213318  | 0.612056  |
| 44 | 1 | 0 | -2.733773 | -0.832291 | 3.029469  |
| 45 | 1 | 0 | -1.856655 | -1.345510 | 1.873082  |
| 46 | 1 | 0 | -0.074522 | 3.409823  | -1.175659 |
| 47 | 1 | 0 | 1.713937  | 2.230893  | -1.636781 |
| 48 | 1 | 0 | -0.591667 | -0.035191 | 3.326546  |
| 49 | 1 | 0 | 0.839114  | 0.112216  | 3.920209  |
| 50 | 8 | 0 | 2.926939  | 2.525880  | -0.222774 |
| 51 | 1 | 0 | 2.231487  | 2.322361  | 0.445171  |
| 52 | 1 | 0 | 3.520705  | 1.760264  | -0.199492 |

## INT2-7wb

| Center<br>Number | Atomic<br>Number | Atomic<br>Type | Coordinates (Angstroms) |           |           |
|------------------|------------------|----------------|-------------------------|-----------|-----------|
|                  |                  |                | X                       | Y         | Z         |
| 1                | 6                | 0              | -3.402579               | -1.638263 | -0.514755 |
| 2                | 6                | 0              | -1.990999               | -1.567634 | -0.420007 |
| 3                | 6                | 0              | -1.408228               | -0.287968 | -0.397714 |
| 4                | 6                | 0              | -2.165360               | 0.878365  | -0.445153 |
| 5                | 6                | 0              | -3.564355               | 0.769635  | -0.502869 |
| 6                | 6                | 0              | -4.189639               | -0.482994 | -0.532083 |
| 7                | 6                | 0              | -1.136233               | -2.778981 | -0.511862 |
| 8                | 8                | 0              | -1.734901               | -3.916474 | -0.834022 |
| 9                | 8                | 0              | -0.036964               | -0.152078 | -0.368699 |
| 10               | 8                | 0              | -4.361699               | 1.874700  | -0.525748 |
| 11               | 8                | 0              | -3.993328               | -2.857891 | -0.607584 |
| 12               | 6                | 0              | 0.202997                | -2.605681 | -0.294583 |
| 13               | 6                | 0              | 0.705408                | -1.294564 | 0.241394  |
| 14               | 6                | 0              | 2.169569                | -1.035926 | -0.005227 |
| 15               | 6                | 0              | 3.053271                | -0.870464 | 1.066707  |
| 16               | 6                | 0              | 4.414942                | -0.639985 | 0.851101  |
| 17               | 6                | 0              | 4.901788                | -0.559840 | -0.458636 |
| 18               | 6                | 0              | 4.028631                | -0.714746 | -1.545100 |
| 19               | 6                | 0              | 2.676154                | -0.957991 | -1.310079 |
| 20               | 8                | 0              | 6.244359                | -0.323534 | -0.619331 |
| 21               | 8                | 0              | 1.112423                | 2.090475  | -1.874799 |
| 22               | 8                | 0              | -0.285501               | 3.937405  | -0.241786 |

|    |   |   |           |           |           |
|----|---|---|-----------|-----------|-----------|
| 23 | 8 | 0 | -2.997448 | 4.223459  | -0.510714 |
| 24 | 8 | 0 | 0.664443  | 1.913803  | 1.496974  |
| 25 | 8 | 0 | 0.127709  | 0.368029  | 3.721375  |
| 26 | 8 | 0 | -1.979000 | -1.224644 | 2.844130  |
| 27 | 1 | 0 | -5.269929 | -0.557662 | -0.593964 |
| 28 | 1 | 0 | -1.678847 | 1.843087  | -0.423569 |
| 29 | 1 | 0 | -3.822452 | 2.708259  | -0.527640 |
| 30 | 1 | 0 | -3.194382 | -3.503691 | -0.718730 |
| 31 | 1 | 0 | 0.903905  | -3.430234 | -0.381149 |
| 32 | 1 | 0 | 0.507861  | -1.189992 | 1.318636  |
| 33 | 1 | 0 | 2.676558  | -0.915193 | 2.084762  |
| 34 | 1 | 0 | 5.099257  | -0.514100 | 1.683786  |
| 35 | 1 | 0 | 4.407734  | -0.647450 | -2.561020 |
| 36 | 1 | 0 | 2.003016  | -1.080544 | -2.153013 |
| 37 | 1 | 0 | 6.468574  | -0.280677 | -1.561050 |
| 38 | 1 | 0 | 0.709153  | 1.260031  | -1.561051 |
| 39 | 1 | 0 | -0.073807 | 3.435759  | 0.570795  |
| 40 | 1 | 0 | -2.013775 | 4.131398  | -0.437510 |
| 41 | 1 | 0 | -3.156156 | 4.702810  | -1.336333 |
| 42 | 1 | 0 | 0.514811  | 1.451770  | 2.355063  |
| 43 | 1 | 0 | 0.409874  | 1.247547  | 0.827875  |
| 44 | 1 | 0 | -2.823056 | -0.791522 | 3.038979  |
| 45 | 1 | 0 | -1.973495 | -1.336565 | 1.876314  |
| 46 | 1 | 0 | 0.122915  | 3.385356  | -0.945618 |
| 47 | 1 | 0 | 1.901543  | 2.195350  | -1.298538 |
| 48 | 1 | 0 | -0.606350 | -0.206656 | 3.400035  |
| 49 | 1 | 0 | 0.885787  | -0.223135 | 3.834250  |
| 50 | 8 | 0 | 3.032355  | 2.454637  | 0.167528  |
| 51 | 1 | 0 | 2.295203  | 2.269975  | 0.793874  |
| 52 | 1 | 0 | 3.594267  | 1.665218  | 0.209438  |

### INT1-7wc

| Center Number | Atomic Number | Atomic Type | Coordinates (Angstroms) |           |           |
|---------------|---------------|-------------|-------------------------|-----------|-----------|
|               |               |             | X                       | Y         | Z         |
| 1             | 6             | 0           | -0.313119               | 1.357429  | 0.320556  |
| 2             | 6             | 0           | 0.453331                | 2.593488  | 0.262321  |
| 3             | 6             | 0           | -0.204772               | 3.758329  | -0.272687 |
| 4             | 6             | 0           | -1.458813               | 3.696405  | -0.865597 |
| 5             | 6             | 0           | -2.142966               | 2.467562  | -0.883268 |
| 6             | 6             | 0           | -1.594316               | 1.332156  | -0.286434 |
| 7             | 6             | 0           | 1.826562                | 2.737388  | 0.720142  |
| 8             | 8             | 0           | 2.290573                | 3.888404  | 1.014289  |
| 9             | 8             | 0           | 0.408250                | 4.968833  | -0.245857 |
| 10            | 8             | 0           | -3.361897               | 2.448163  | -1.477014 |
| 11            | 8             | 0           | 0.135179                | 0.304262  | 0.942385  |
| 12            | 6             | 0           | 2.811133                | 1.642381  | 0.789512  |
| 13            | 6             | 0           | 2.833777                | 0.577825  | -0.039030 |
| 14            | 6             | 0           | 3.854453                | -0.464813 | -0.120738 |
| 15            | 6             | 0           | 5.014385                | -0.490240 | 0.681792  |
| 16            | 6             | 0           | 5.946386                | -1.516914 | 0.573814  |
| 17            | 6             | 0           | 5.740033                | -2.554612 | -0.349236 |
| 18            | 6             | 0           | 4.599087                | -2.552724 | -1.159705 |
| 19            | 6             | 0           | 3.675261                | -1.518381 | -1.041633 |
| 20            | 8             | 0           | 6.618279                | -3.591443 | -0.501602 |
| 21            | 8             | 0           | -1.149593               | -1.783353 | 0.704790  |
| 22            | 8             | 0           | -4.485500               | 0.022174  | -1.463643 |
| 23            | 8             | 0           | -2.568422               | -2.049277 | -1.531645 |
| 24            | 8             | 0           | -3.240053               | -1.669059 | 2.383986  |
| 25            | 8             | 0           | -5.440904               | -0.497310 | 1.059005  |
| 26            | 8             | 0           | -4.363750               | -4.094977 | -1.103192 |
| 27            | 8             | 0           | -5.353223               | -3.298670 | 1.386662  |
| 28            | 1             | 0           | -1.908327               | 4.587847  | -1.287736 |
| 29            | 1             | 0           | -2.167054               | 0.415047  | -0.247044 |
| 30            | 1             | 0           | -3.759147               | 1.532543  | -1.456515 |
| 31            | 1             | 0           | 1.242576                | 4.831460  | 0.293212  |
| 32            | 1             | 0           | 3.632431                | 1.845315  | 1.472618  |
| 33            | 1             | 0           | 2.003554                | 0.457445  | -0.729238 |
| 34            | 1             | 0           | 2.791225                | -1.525581 | -1.673632 |
| 35            | 1             | 0           | 4.449786                | -3.359398 | -1.870019 |
| 36            | 1             | 0           | 6.833609                | -1.517203 | 1.201628  |
| 37            | 1             | 0           | 5.197427                | 0.300924  | 1.401539  |
| 38            | 1             | 0           | 7.367665                | -3.495309 | 0.103686  |

|    |   |   |           |           |           |
|----|---|---|-----------|-----------|-----------|
| 39 | 1 | 0 | -0.582702 | -0.862227 | 0.799080  |
| 40 | 1 | 0 | -1.985016 | -2.091462 | -2.301215 |
| 41 | 1 | 0 | -3.821643 | -0.689916 | -1.579885 |
| 42 | 1 | 0 | -4.884095 | -0.147009 | -0.575422 |
| 43 | 1 | 0 | -4.622779 | -0.555446 | 1.591591  |
| 44 | 1 | 0 | -5.729374 | -1.434422 | 1.055344  |
| 45 | 1 | 0 | -1.978452 | -1.960699 | -0.728116 |
| 46 | 1 | 0 | -0.544492 | -2.519456 | 0.868663  |
| 47 | 1 | 0 | -5.024463 | -4.084387 | -1.808297 |
| 48 | 1 | 0 | -3.711824 | -3.392233 | -1.332028 |
| 49 | 1 | 0 | -5.038011 | -3.635463 | 0.519023  |
| 50 | 1 | 0 | -4.551288 | -2.981387 | 1.846104  |
| 51 | 1 | 0 | -2.424348 | -1.723589 | 1.816340  |
| 52 | 1 | 0 | -2.939285 | -1.569046 | 3.296160  |

-----

### TS2-7wc

| Center<br>Number | Atomic<br>Number | Atomic<br>Type | Coordinates (Angstroms) |           |           |
|------------------|------------------|----------------|-------------------------|-----------|-----------|
|                  |                  |                | X                       | Y         | Z         |
| 1                | 6                | 0              | -3.590310               | -1.291011 | -0.857668 |
| 2                | 6                | 0              | -2.963428               | -0.829619 | 0.311518  |
| 3                | 6                | 0              | -2.753359               | -1.745867 | 1.357995  |
| 4                | 6                | 0              | -3.168555               | -3.071566 | 1.256070  |
| 5                | 6                | 0              | -3.800746               | -3.507556 | 0.084359  |
| 6                | 6                | 0              | -4.010394               | -2.614055 | -0.976081 |
| 7                | 6                | 0              | -2.462719               | 0.555026  | 0.433790  |
| 8                | 6                | 0              | -3.126459               | 1.654105  | -0.189139 |
| 9                | 6                | 0              | -2.456424               | 2.882234  | -0.257217 |
| 10               | 8                | 0              | -3.016445               | 3.996575  | -0.612550 |
| 11               | 8                | 0              | -4.186826               | -4.818249 | 0.032268  |
| 12               | 6                | 0              | -0.991294               | 2.878479  | -0.006266 |
| 13               | 6                | 0              | -0.288342               | 4.107191  | 0.124712  |
| 14               | 6                | 0              | 1.103253                | 4.157144  | 0.242900  |
| 15               | 6                | 0              | 1.834963                | 2.965846  | 0.163121  |
| 16               | 6                | 0              | 1.185585                | 1.738078  | -0.043335 |
| 17               | 6                | 0              | -0.212766               | 1.684612  | -0.113411 |
| 18               | 8                | 0              | -0.982034               | 5.273952  | 0.121675  |
| 19               | 8                | 0              | -0.793727               | 0.483843  | -0.309233 |
| 20               | 8                | 0              | 3.185682                | 3.041605  | 0.292192  |
| 21               | 8                | 0              | 0.494598                | -1.672491 | 0.331714  |
| 22               | 8                | 0              | 2.670021                | -1.187507 | 1.884327  |
| 23               | 8                | 0              | 4.309445                | 0.614992  | 0.431799  |
| 24               | 8                | 0              | 4.294929                | -0.784632 | -1.934504 |
| 25               | 8                | 0              | 4.416683                | -3.493103 | -1.198923 |
| 26               | 8                | 0              | 4.396567                | -3.331056 | 1.589944  |
| 27               | 1                | 0              | 1.608210                | 5.109157  | 0.364206  |
| 28               | 1                | 0              | 1.757796                | 0.822531  | -0.121435 |
| 29               | 1                | 0              | 3.593632                | 2.132138  | 0.307614  |
| 30               | 1                | 0              | -1.916725               | 5.001891  | -0.182820 |
| 31               | 1                | 0              | -4.083943               | 1.528270  | -0.683341 |
| 32               | 1                | 0              | -2.011081               | 0.749344  | 1.408646  |
| 33               | 1                | 0              | -2.259565               | -1.413127 | 2.267450  |
| 34               | 1                | 0              | -3.010950               | -3.773691 | 2.068258  |
| 35               | 1                | 0              | -4.490659               | -2.956922 | -1.888581 |
| 36               | 1                | 0              | -3.739280               | -0.610844 | -1.690210 |
| 37               | 1                | 0              | -4.618142               | -5.013660 | -0.812278 |
| 38               | 1                | 0              | -0.019434               | -0.830738 | 0.103271  |
| 39               | 1                | 0              | 2.403023                | -0.918549 | 2.773714  |
| 40               | 1                | 0              | 3.776138                | 0.027532  | 1.006136  |
| 41               | 1                | 0              | 4.348786                | 0.149194  | -0.438459 |
| 42               | 1                | 0              | 3.355011                | -0.990858 | -2.099163 |
| 43               | 1                | 0              | 4.645463                | -1.671050 | -1.699739 |
| 44               | 1                | 0              | 1.834690                | -1.360179 | 1.379060  |
| 45               | 1                | 0              | -0.158393               | -2.307513 | 0.659654  |
| 46               | 1                | 0              | 5.249850                | -3.102512 | 1.981921  |
| 47               | 1                | 0              | 3.800768                | -2.570402 | 1.776689  |
| 48               | 1                | 0              | 4.447520                | -3.491100 | -0.216690 |
| 49               | 1                | 0              | 3.474383                | -3.374200 | -1.426948 |
| 50               | 8                | 0              | 1.907180                | -2.344482 | -1.910991 |
| 51               | 1                | 0              | 1.331456                | -2.152112 | -1.132396 |
| 52               | 1                | 0              | 1.318853                | -2.596417 | -2.634385 |

-----

**INT2-7wc**

| Center<br>Number | Atomic<br>Number | Atomic<br>Type | Coordinates (Angstroms) |           |           |
|------------------|------------------|----------------|-------------------------|-----------|-----------|
|                  |                  |                | X                       | Y         | Z         |
| 1                | 6                | 0              | 0.529748                | 1.680396  | -0.123469 |
| 2                | 6                | 0              | 1.444188                | 2.735771  | 0.006632  |
| 3                | 6                | 0              | 0.919379                | 4.050324  | 0.057635  |
| 4                | 6                | 0              | -0.455982               | 4.285213  | -0.067193 |
| 5                | 6                | 0              | -1.332338               | 3.201134  | -0.206305 |
| 6                | 6                | 0              | -0.844608               | 1.881652  | -0.225426 |
| 7                | 6                | 0              | 2.889993                | 2.464004  | 0.225003  |
| 8                | 8                | 0              | 3.632907                | 3.478695  | 0.619609  |
| 9                | 8                | 0              | 1.770215                | 5.085264  | 0.253687  |
| 10               | 8                | 0              | -2.660710               | 3.468801  | -0.328779 |
| 11               | 8                | 0              | 0.986193                | 0.379963  | -0.088557 |
| 12               | 6                | 0              | 3.309027                | 1.172060  | 0.028562  |
| 13               | 6                | 0              | 2.372394                | 0.190874  | -0.609990 |
| 14               | 6                | 0              | 2.684323                | -1.268092 | -0.385387 |
| 15               | 6                | 0              | 3.041066                | -1.744016 | 0.883318  |
| 16               | 6                | 0              | 3.247495                | -3.104554 | 1.111607  |
| 17               | 6                | 0              | 3.095012                | -4.015228 | 0.056903  |
| 18               | 6                | 0              | 2.741249                | -3.559064 | -1.218058 |
| 19               | 6                | 0              | 2.538128                | -2.194189 | -1.427715 |
| 20               | 8                | 0              | 3.280662                | -5.364024 | 0.211496  |
| 21               | 8                | 0              | -0.719199               | -1.667244 | -0.498755 |
| 22               | 8                | 0              | -4.130023               | 1.232148  | -0.491666 |
| 23               | 8                | 0              | -2.913835               | -0.889524 | -1.941237 |
| 24               | 8                | 0              | -2.055000               | -1.967309 | 1.895153  |
| 25               | 8                | 0              | -4.172674               | -0.046475 | 1.937804  |
| 26               | 8                | 0              | -4.927509               | -2.714733 | -1.379012 |
| 27               | 8                | 0              | -4.759806               | -2.737413 | 1.407819  |
| 28               | 1                | 0              | -0.841254               | 5.298734  | -0.034310 |
| 29               | 1                | 0              | -1.518038               | 1.041137  | -0.328909 |
| 30               | 1                | 0              | -3.189012               | 2.627155  | -0.399087 |
| 31               | 1                | 0              | 2.678995                | 4.609540  | 0.443245  |
| 32               | 1                | 0              | 4.340619                | 0.878942  | 0.194802  |
| 33               | 1                | 0              | 2.262242                | 0.361299  | -1.695304 |
| 34               | 1                | 0              | 2.257088                | -1.845918 | -2.418532 |
| 35               | 1                | 0              | 2.630329                | -4.273696 | -2.027234 |
| 36               | 1                | 0              | 3.522254                | -3.458909 | 2.101801  |
| 37               | 1                | 0              | 3.153954                | -1.039273 | 1.701503  |
| 38               | 1                | 0              | 3.518679                | -5.571043 | 1.126570  |
| 39               | 1                | 0              | -0.070001               | -0.927787 | -0.375374 |
| 40               | 1                | 0              | -2.682755               | -0.731080 | -2.866689 |
| 41               | 1                | 0              | -3.744345               | 0.547486  | -1.074836 |
| 42               | 1                | 0              | -4.185093               | 0.804306  | 0.397562  |
| 43               | 1                | 0              | -3.264183               | -0.378687 | 2.066137  |
| 44               | 1                | 0              | -4.663113               | -0.883931 | 1.787660  |
| 45               | 1                | 0              | -2.085021               | -1.185262 | -1.491860 |
| 46               | 1                | 0              | -0.203026               | -2.421072 | -0.820236 |
| 47               | 1                | 0              | -5.766619               | -2.377307 | -1.719682 |
| 48               | 1                | 0              | -4.242224               | -2.066710 | -1.657815 |
| 49               | 1                | 0              | -4.858911               | -2.781766 | 0.430986  |
| 50               | 1                | 0              | -3.797573               | -2.765060 | 1.571561  |
| 51               | 1                | 0              | -1.514859               | -1.918254 | 1.073753  |
| 52               | 1                | 0              | -1.462336               | -2.265754 | 2.597091  |

**INT1-7wd**

| Center<br>Number | Atomic<br>Number | Atomic<br>Type | Coordinates (Angstroms) |           |           |
|------------------|------------------|----------------|-------------------------|-----------|-----------|
|                  |                  |                | X                       | Y         | Z         |
| 1                | 6                | 0              | -0.369545               | -1.485247 | -0.332984 |
| 2                | 6                | 0              | 0.441563                | -2.701789 | -0.358431 |
| 3                | 6                | 0              | -0.188104               | -3.932045 | 0.059836  |
| 4                | 6                | 0              | -1.462230               | -3.971782 | 0.610643  |
| 5                | 6                | 0              | -2.190937               | -2.772062 | 0.711972  |
| 6                | 6                | 0              | -1.662903               | -1.570556 | 0.253540  |
| 7                | 6                | 0              | 1.821545                | -2.763322 | -0.803635 |
| 8                | 8                | 0              | 2.341213                | -3.876008 | -1.156897 |
| 9                | 8                | 0              | 0.473333                | -5.112465 | -0.049592 |
| 10               | 8                | 0              | -3.438433               | -2.842132 | 1.249641  |



|    |   |   |           |           |           |
|----|---|---|-----------|-----------|-----------|
| 11 | 8 | 0 | 0.031910  | -0.366832 | -0.847312 |
| 12 | 6 | 0 | 2.763192  | -1.627907 | -0.809125 |
| 13 | 6 | 0 | 2.752940  | -0.611958 | 0.077869  |
| 14 | 6 | 0 | 3.740286  | 0.457659  | 0.214341  |
| 15 | 6 | 0 | 4.894936  | 0.564295  | -0.589053 |
| 16 | 6 | 0 | 5.793827  | 1.613593  | -0.429059 |
| 17 | 6 | 0 | 5.558399  | 2.593105  | 0.548716  |
| 18 | 6 | 0 | 4.422808  | 2.509689  | 1.362189  |
| 19 | 6 | 0 | 3.532318  | 1.453361  | 1.191693  |
| 20 | 8 | 0 | 6.403280  | 3.649037  | 0.752842  |
| 21 | 8 | 0 | -1.731797 | 1.466002  | -0.634591 |
| 22 | 8 | 0 | -2.872825 | 1.736609  | 1.739497  |
| 23 | 8 | 0 | -4.668390 | -0.403983 | 1.168099  |
| 24 | 8 | 0 | -2.093657 | 3.857806  | -2.021918 |
| 25 | 8 | 0 | -4.723253 | 3.694284  | 1.304243  |
| 26 | 8 | 0 | -4.780766 | 3.471176  | -1.383486 |
| 27 | 8 | 0 | -4.291596 | 0.670427  | -1.363070 |
| 28 | 1 | 0 | -1.891177 | -4.914757 | 0.929622  |
| 29 | 1 | 0 | -2.263023 | -0.675075 | 0.303827  |
| 30 | 1 | 0 | -3.878322 | -1.951695 | 1.226793  |
| 31 | 1 | 0 | 1.318907  | -4.895268 | -0.547794 |
| 32 | 1 | 0 | 3.589827  | -1.762267 | -1.502872 |
| 33 | 1 | 0 | 1.920860  | -0.557121 | 0.773834  |
| 34 | 1 | 0 | 2.651826  | 1.397909  | 1.826235  |
| 35 | 1 | 0 | 4.250929  | 3.271805  | 2.115357  |
| 36 | 1 | 0 | 6.677891  | 1.675824  | -1.058171 |
| 37 | 1 | 0 | 5.099799  | -0.180586 | -1.351111 |
| 38 | 1 | 0 | 7.147323  | 3.614154  | 0.134486  |
| 39 | 1 | 0 | -0.976181 | 0.775932  | -0.761191 |
| 40 | 1 | 0 | -2.243052 | 1.798801  | 2.469485  |
| 41 | 1 | 0 | -4.104170 | 0.262485  | 1.608841  |
| 42 | 1 | 0 | -4.691558 | -0.083298 | 0.235015  |
| 43 | 1 | 0 | -3.336096 | 0.858918  | -1.210611 |
| 44 | 1 | 0 | -4.676068 | 1.562680  | -1.467536 |
| 45 | 1 | 0 | -2.341349 | 1.676384  | 0.893074  |
| 46 | 1 | 0 | -1.590472 | 2.271920  | -1.171846 |
| 47 | 1 | 0 | -5.537496 | 3.462156  | 1.770399  |
| 48 | 1 | 0 | -4.057995 | 3.007174  | 1.553660  |
| 49 | 1 | 0 | -4.851180 | 3.624651  | -0.404649 |
| 50 | 1 | 0 | -5.483696 | 3.984255  | -1.803343 |
| 51 | 1 | 0 | -1.948557 | 3.890228  | -2.976517 |
| 52 | 1 | 0 | -3.067690 | 3.803224  | -1.895714 |

### TS2-7wd

| Center<br>Number | Atomic<br>Number | Atomic<br>Type | Coordinates (Angstroms) |           |           |
|------------------|------------------|----------------|-------------------------|-----------|-----------|
|                  |                  |                | X                       | Y         | Z         |
| 1                | 6                | 0              | -1.758477               | 3.436800  | -0.663941 |
| 2                | 6                | 0              | -1.287533               | 2.557728  | 0.326126  |
| 3                | 6                | 0              | -2.235070               | 1.859386  | 1.096091  |
| 4                | 6                | 0              | -3.602132               | 2.039117  | 0.904644  |
| 5                | 6                | 0              | -4.048733               | 2.928036  | -0.080788 |
| 6                | 6                | 0              | -3.123088               | 3.629414  | -0.867285 |
| 7                | 6                | 0              | 0.151968                | 2.294783  | 0.523655  |
| 8                | 6                | 0              | 1.151140                | 3.264498  | 0.220480  |
| 9                | 6                | 0              | 2.489978                | 2.852915  | 0.168348  |
| 10               | 8                | 0              | 3.494744                | 3.670440  | 0.102643  |
| 11               | 8                | 0              | -5.401353               | 3.065449  | -0.234810 |
| 12               | 6                | 0              | 2.759467                | 1.394966  | 0.074182  |
| 13               | 6                | 0              | 4.089932                | 0.908574  | 0.203113  |
| 14               | 6                | 0              | 4.412431                | -0.438364 | 0.011985  |
| 15               | 6                | 0              | 3.403739                | -1.322735 | -0.388150 |
| 16               | 6                | 0              | 2.098503                | -0.866846 | -0.616069 |
| 17               | 6                | 0              | 1.758703                | 0.472003  | -0.368744 |
| 18               | 8                | 0              | 5.087830                | 1.775238  | 0.514492  |
| 19               | 8                | 0              | 0.485097                | 0.848782  | -0.578394 |
| 20               | 8                | 0              | 3.729290                | -2.635798 | -0.551971 |
| 21               | 8                | 0              | -1.065074               | -1.229976 | -0.030641 |
| 22               | 8                | 0              | -0.042404               | -3.029914 | 1.646416  |
| 23               | 8                | 0              | 1.476217                | -4.159835 | -0.462269 |
| 24               | 8                | 0              | -0.754064               | -3.273887 | -1.888150 |
| 25               | 8                | 0              | -3.194677               | -4.142588 | -0.695267 |
| 26               | 8                | 0              | -2.012700               | -4.928941 | 1.603334  |
| 27               | 1                | 0              | 5.431186                | -0.782873 | 0.151351  |

|    |   |   |           |           |           |
|----|---|---|-----------|-----------|-----------|
| 28 | 1 | 0 | 1.333251  | -1.556143 | -0.944781 |
| 29 | 1 | 0 | 2.907617  | -3.187472 | -0.628175 |
| 30 | 1 | 0 | 4.658941  | 2.693552  | 0.397966  |
| 31 | 1 | 0 | 0.889067  | 4.278470  | -0.062707 |
| 32 | 1 | 0 | 0.344478  | 1.649553  | 1.382587  |
| 33 | 1 | 0 | -1.894049 | 1.158745  | 1.853404  |
| 34 | 1 | 0 | -4.328317 | 1.495490  | 1.499922  |
| 35 | 1 | 0 | -3.470964 | 4.312220  | -1.637735 |
| 36 | 1 | 0 | -1.051159 | 3.967987  | -1.292648 |
| 37 | 1 | 0 | -5.601405 | 3.700676  | -0.937540 |
| 38 | 1 | 0 | -0.590435 | -0.375854 | -0.227659 |
| 39 | 1 | 0 | 0.310854  | -2.667416 | 2.469317  |
| 40 | 1 | 0 | 1.094524  | -3.876991 | 0.393996  |
| 41 | 1 | 0 | 0.747423  | -3.969081 | -1.096695 |
| 42 | 1 | 0 | -0.849755 | -2.459742 | -1.343921 |
| 43 | 1 | 0 | -1.571326 | -3.766051 | -1.678199 |
| 44 | 1 | 0 | -0.402566 | -2.266503 | 1.116432  |
| 45 | 1 | 0 | -2.035975 | -1.084695 | 0.022543  |
| 46 | 1 | 0 | -1.598801 | -5.802364 | 1.596429  |
| 47 | 1 | 0 | -1.277348 | -4.278154 | 1.705933  |
| 48 | 1 | 0 | -2.824606 | -4.525691 | 0.142764  |
| 49 | 1 | 0 | -3.866283 | -4.759309 | -1.015228 |
| 50 | 8 | 0 | -3.784085 | -1.519589 | 0.042399  |
| 51 | 1 | 0 | -4.338063 | -1.031430 | -0.580795 |
| 52 | 1 | 0 | -3.731814 | -2.443639 | -0.290710 |

### INT2-7wd

| Center<br>Number | Atomic<br>Number | Atomic<br>Type | Coordinates (Angstroms) |           |           |
|------------------|------------------|----------------|-------------------------|-----------|-----------|
|                  |                  |                | X                       | Y         | Z         |
| 1                | 6                | 0              | -1.877024               | 0.072062  | -0.071467 |
| 2                | 6                | 0              | -3.148584               | -0.505434 | 0.059218  |
| 3                | 6                | 0              | -4.269791               | 0.356461  | -0.020982 |
| 4                | 6                | 0              | -4.110882               | 1.740919  | -0.173691 |
| 5                | 6                | 0              | -2.821488               | 2.275959  | -0.284185 |
| 6                | 6                | 0              | -1.691964               | 1.441803  | -0.245060 |
| 7                | 6                | 0              | -3.302278               | -1.982029 | 0.140935  |
| 8                | 8                | 0              | -4.521355               | -2.462222 | -0.011843 |
| 9                | 8                | 0              | -5.511208               | -0.182566 | 0.032184  |
| 10               | 8                | 0              | -2.695366               | 3.625951  | -0.427910 |
| 11               | 8                | 0              | -0.759460               | -0.732741 | -0.096151 |
| 12               | 6                | 0              | -2.156023               | -2.710160 | 0.335902  |
| 13               | 6                | 0              | -0.882047               | -1.996235 | 0.681641  |
| 14               | 6                | 0              | 0.400075                | -2.747036 | 0.412256  |
| 15               | 6                | 0              | 0.554088                | -3.543897 | -0.729805 |
| 16               | 6                | 0              | 1.770689                | -4.163177 | -1.018836 |
| 17               | 6                | 0              | 2.861580                | -3.983124 | -0.157900 |
| 18               | 6                | 0              | 2.726676                | -3.194087 | 0.989638  |
| 19               | 6                | 0              | 1.502349                | -2.584379 | 1.263326  |
| 20               | 8                | 0              | 4.086155                | -4.556488 | -0.386901 |
| 21               | 8                | 0              | 1.514152                | 0.804735  | 0.112643  |
| 22               | 8                | 0              | 1.267295                | 2.937687  | 1.729838  |
| 23               | 8                | 0              | -0.073926               | 4.371661  | -0.327949 |
| 24               | 8                | 0              | 4.164398                | 0.269804  | -0.140706 |
| 25               | 8                | 0              | 3.696941                | 4.154570  | 1.351297  |
| 26               | 8                | 0              | 4.322677                | 2.920051  | -0.965245 |
| 27               | 8                | 0              | 1.628577                | 2.789239  | -1.869550 |
| 28               | 1                | 0              | -4.980184               | 2.387978  | -0.222340 |
| 29               | 1                | 0              | -0.698392               | 1.854396  | -0.336732 |
| 30               | 1                | 0              | -1.738346               | 3.888504  | -0.433044 |
| 31               | 1                | 0              | -5.321759               | -1.209434 | 0.017588  |
| 32               | 1                | 0              | -2.178004               | -3.794112 | 0.386271  |
| 33               | 1                | 0              | -0.868685               | -1.654500 | 1.732181  |
| 34               | 1                | 0              | 1.406198                | -1.964067 | 2.150923  |
| 35               | 1                | 0              | 3.578784                | -3.062689 | 1.648833  |
| 36               | 1                | 0              | 1.874939                | -4.780336 | -1.907541 |
| 37               | 1                | 0              | -0.288012               | -3.677784 | -1.401973 |
| 38               | 1                | 0              | 4.070396                | -5.069509 | -1.207528 |
| 39               | 1                | 0              | 0.822159                | 0.110564  | 0.061809  |
| 40               | 1                | 0              | 0.931259                | 2.747389  | 2.615639  |
| 41               | 1                | 0              | 0.283269                | 4.041151  | 0.520647  |
| 42               | 1                | 0              | 0.509657                | 3.941608  | -0.995253 |
| 43               | 1                | 0              | 1.512821                | 1.995439  | -1.304571 |
| 44               | 1                | 0              | 2.575961                | 2.999844  | -1.752138 |

|    |   |   |          |           |           |
|----|---|---|----------|-----------|-----------|
| 45 | 1 | 0 | 1.331250 | 2.071899  | 1.248005  |
| 46 | 1 | 0 | 2.409847 | 0.395066  | 0.066674  |
| 47 | 1 | 0 | 3.564094 | 5.110946  | 1.306415  |
| 48 | 1 | 0 | 2.817298 | 3.765578  | 1.571405  |
| 49 | 1 | 0 | 4.185150 | 3.443169  | -0.132188 |
| 50 | 1 | 0 | 5.101780 | 3.285703  | -1.404734 |
| 51 | 1 | 0 | 4.453349 | -0.371374 | -0.803541 |
| 52 | 1 | 0 | 4.361889 | 1.161258  | -0.508398 |

### INT1-7we

| Center<br>Number | Atomic<br>Number | Atomic<br>Type | Coordinates (Angstroms) |           |           |
|------------------|------------------|----------------|-------------------------|-----------|-----------|
|                  |                  |                | X                       | Y         | Z         |
| 1                | 6                | 0              | -2.845151               | -2.386876 | 0.626350  |
| 2                | 6                | 0              | -1.983479               | -1.847882 | -0.349543 |
| 3                | 6                | 0              | -2.550852               | -1.019513 | -1.339814 |
| 4                | 6                | 0              | -3.912359               | -0.717113 | -1.346137 |
| 5                | 6                | 0              | -4.732754               | -1.232524 | -0.338774 |
| 6                | 6                | 0              | -4.204198               | -2.085508 | 0.637460  |
| 7                | 6                | 0              | -0.532274               | -2.034708 | -0.323522 |
| 8                | 6                | 0              | 0.169953                | -2.926682 | 0.399356  |
| 9                | 6                | 0              | 1.647780                | -3.004993 | 0.336542  |
| 10               | 8                | 0              | 2.145847                | -4.172271 | 0.239944  |
| 11               | 8                | 0              | -6.044262               | -0.811967 | -0.323187 |
| 12               | 6                | 0              | 2.472011                | -1.818801 | 0.278236  |
| 13               | 6                | 0              | 3.759660                | -1.911161 | -0.358451 |
| 14               | 6                | 0              | 4.511812                | -0.786532 | -0.668920 |
| 15               | 6                | 0              | 4.019734                | 0.479352  | -0.288979 |
| 16               | 6                | 0              | 2.849796                | 0.606903  | 0.453211  |
| 17               | 6                | 0              | 2.050941                | -0.517794 | 0.791171  |
| 18               | 8                | 0              | 4.251679                | -3.122769 | -0.727600 |
| 19               | 8                | 0              | 1.013090                | -0.375268 | 1.550777  |
| 20               | 8                | 0              | 4.751412                | 1.568157  | -0.648874 |
| 21               | 8                | 0              | 0.011967                | 1.961383  | 1.220478  |
| 22               | 8                | 0              | 3.162926                | 3.773508  | -0.467661 |
| 23               | 8                | 0              | 1.745449                | 3.920477  | 1.961386  |
| 24               | 8                | 0              | 0.757726                | 2.734689  | -1.371250 |
| 25               | 8                | 0              | -2.705178               | 1.893687  | 0.296283  |
| 26               | 8                | 0              | -5.444283               | 1.870992  | 0.714334  |
| 27               | 8                | 0              | -1.839689               | 3.837352  | -1.504595 |
| 28               | 1                | 0              | 5.450733                | -0.881638 | -1.202240 |
| 29               | 1                | 0              | 2.545570                | 1.579348  | 0.815327  |
| 30               | 1                | 0              | 4.216371                | 2.395748  | -0.513332 |
| 31               | 1                | 0              | 3.595998                | -3.796643 | -0.389038 |
| 32               | 1                | 0              | -0.314496               | -3.710513 | 0.977008  |
| 33               | 1                | 0              | 0.028987                | -1.330444 | -0.934753 |
| 34               | 1                | 0              | -1.912081               | -0.596339 | -2.110560 |
| 35               | 1                | 0              | -4.338138               | -0.064498 | -2.101248 |
| 36               | 1                | 0              | -4.845226               | -2.481171 | 1.420015  |
| 37               | 1                | 0              | -2.445648               | -3.017286 | 1.413998  |
| 38               | 1                | 0              | -6.558382               | -1.312265 | 0.328700  |
| 39               | 1                | 0              | 0.358801                | 1.014077  | 1.402773  |
| 40               | 1                | 0              | -0.053476               | 3.233304  | -1.597523 |
| 41               | 1                | 0              | 2.349064                | 3.496494  | -0.950666 |
| 42               | 1                | 0              | 2.828600                | 3.924627  | 0.442959  |
| 43               | 1                | 0              | -5.819579               | 1.037206  | 0.376023  |
| 44               | 1                | 0              | -5.791076               | 1.971075  | 1.611195  |
| 45               | 1                | 0              | -2.618469               | 1.039170  | -0.156460 |
| 46               | 1                | 0              | -3.658224               | 1.939318  | 0.543942  |
| 47               | 1                | 0              | 0.540542                | 2.346412  | -0.493223 |
| 48               | 1                | 0              | -0.960320               | 1.942825  | 1.167349  |
| 49               | 1                | 0              | -2.359086               | 3.783644  | -2.317458 |
| 50               | 1                | 0              | -2.231925               | 3.175919  | -0.890168 |
| 51               | 1                | 0              | 2.163569                | 3.674010  | 2.796604  |
| 52               | 1                | 0              | 1.050698                | 3.236856  | 1.791367  |

### TS2-7we

| Center<br>Number | Atomic<br>Number | Atomic<br>Type | Coordinates (Angstroms) |   |   |
|------------------|------------------|----------------|-------------------------|---|---|
|                  |                  |                | X                       | Y | Z |

|    |   |   |           |           |           |
|----|---|---|-----------|-----------|-----------|
| 1  | 6 | 0 | -4.168317 | -1.183369 | 0.326145  |
| 2  | 6 | 0 | -2.791047 | -1.496449 | 0.153183  |
| 3  | 6 | 0 | -1.908480 | -0.419617 | -0.188599 |
| 4  | 6 | 0 | -2.407334 | 0.886381  | -0.306428 |
| 5  | 6 | 0 | -3.757195 | 1.159700  | -0.050373 |
| 6  | 6 | 0 | -4.649959 | 0.127492  | 0.265689  |
| 7  | 6 | 0 | -2.355152 | -2.914447 | 0.077591  |
| 8  | 8 | 0 | -3.255858 | -3.830186 | -0.088239 |
| 9  | 8 | 0 | -0.603755 | -0.619687 | -0.423536 |
| 10 | 8 | 0 | -4.239046 | 2.432012  | -0.100267 |
| 11 | 8 | 0 | -5.055795 | -2.188644 | 0.543344  |
| 12 | 6 | 0 | -0.973004 | -3.168294 | 0.084784  |
| 13 | 6 | 0 | -0.106042 | -2.129892 | 0.520703  |
| 14 | 6 | 0 | 1.356387  | -2.176119 | 0.317426  |
| 15 | 6 | 0 | 2.213640  | -1.604542 | 1.272634  |
| 16 | 6 | 0 | 3.590423  | -1.552354 | 1.068437  |
| 17 | 6 | 0 | 4.123328  | -2.050207 | -0.123735 |
| 18 | 6 | 0 | 3.294018  | -2.635961 | -1.086599 |
| 19 | 6 | 0 | 1.920248  | -2.697479 | -0.858423 |
| 20 | 8 | 0 | 5.480476  | -1.894850 | -0.311952 |
| 21 | 8 | 0 | 5.705449  | 0.972681  | -0.414664 |
| 22 | 8 | 0 | 0.815381  | 1.626843  | -0.505841 |
| 23 | 8 | 0 | -0.197808 | 3.494856  | 1.313380  |
| 24 | 8 | 0 | 2.466570  | 4.450606  | 1.183717  |
| 25 | 8 | 0 | 3.342260  | 1.842603  | 0.657285  |
| 26 | 8 | 0 | -2.211876 | 4.218911  | -0.456402 |
| 27 | 1 | 0 | -5.702944 | 0.331783  | 0.425285  |
| 28 | 1 | 0 | -1.732663 | 1.688551  | -0.567207 |
| 29 | 1 | 0 | -3.501384 | 3.079357  | -0.258898 |
| 30 | 1 | 0 | -4.529269 | -3.032007 | 0.324981  |
| 31 | 1 | 0 | -0.586336 | -4.089470 | -0.339044 |
| 32 | 1 | 0 | -0.383632 | -1.619693 | 1.444220  |
| 33 | 1 | 0 | 1.795201  | -1.189010 | 2.185390  |
| 34 | 1 | 0 | 4.255049  | -1.121769 | 1.810711  |
| 35 | 1 | 0 | 3.715904  | -3.018621 | -2.011828 |
| 36 | 1 | 0 | 1.273733  | -3.126489 | -1.617312 |
| 37 | 1 | 0 | 5.768568  | -2.342289 | -1.121779 |
| 38 | 1 | 0 | 0.390121  | 0.727382  | -0.458284 |
| 39 | 1 | 0 | 0.627329  | 4.016440  | 1.386732  |
| 40 | 1 | 0 | -1.565547 | 4.105445  | 0.279032  |
| 41 | 1 | 0 | -1.678984 | 3.987875  | -1.247929 |
| 42 | 1 | 0 | 5.758322  | -0.002461 | -0.434485 |
| 43 | 1 | 0 | 5.910620  | 1.269045  | -1.311734 |
| 44 | 1 | 0 | 3.271953  | 1.312107  | 1.463185  |
| 45 | 1 | 0 | 4.188232  | 1.559389  | 0.230128  |
| 46 | 1 | 0 | 0.081968  | 2.734336  | 0.756815  |
| 47 | 1 | 0 | 1.751867  | 1.558424  | -0.228030 |
| 48 | 1 | 0 | 2.928860  | 4.835211  | 1.939752  |
| 49 | 1 | 0 | 2.896101  | 3.583583  | 1.016536  |
| 50 | 8 | 0 | -0.338615 | 3.298789  | -2.349132 |
| 51 | 1 | 0 | -0.643887 | 2.781496  | -3.105891 |
| 52 | 1 | 0 | 0.162663  | 2.670850  | -1.776500 |

## INT2-7we

| Center<br>Number | Atomic<br>Number | Atomic<br>Type | Coordinates (Angstroms) |           |           |
|------------------|------------------|----------------|-------------------------|-----------|-----------|
|                  |                  |                | X                       | Y         | Z         |
| 1                | 6                | 0              | -1.552462               | -2.651605 | 0.850567  |
| 2                | 6                | 0              | -1.145045               | -2.159712 | -0.396644 |
| 3                | 6                | 0              | -2.126633               | -1.758367 | -1.311518 |
| 4                | 6                | 0              | -3.483142               | -1.825634 | -0.991150 |
| 5                | 6                | 0              | -3.863645               | -2.287053 | 0.270261  |
| 6                | 6                | 0              | -2.903601               | -2.716937 | 1.192084  |
| 7                | 6                | 0              | 0.316794                | -1.941534 | -0.704623 |
| 8                | 6                | 0              | 1.257817                | -3.044869 | -0.318246 |
| 9                | 6                | 0              | 2.593169                | -2.760782 | -0.171368 |
| 10               | 8                | 0              | 3.568133                | -3.632186 | -0.002112 |
| 11               | 8                | 0              | -5.213525               | -2.261353 | 0.565393  |
| 12               | 6                | 0              | 2.971246                | -1.322138 | -0.164272 |
| 13               | 6                | 0              | 4.324320                | -0.904958 | -0.127001 |
| 14               | 6                | 0              | 4.663315                | 0.451825  | -0.024774 |
| 15               | 6                | 0              | 3.645661                | 1.408941  | 0.080598  |
| 16               | 6                | 0              | 2.295430                | 1.022634  | 0.074874  |
| 17               | 6                | 0              | 1.987358                | -0.329288 | -0.049340 |

|    |   |   |           |           |           |
|----|---|---|-----------|-----------|-----------|
| 18 | 8 | 0 | 5.297286  | -1.847043 | -0.165272 |
| 19 | 8 | 0 | 0.660757  | -0.686352 | 0.010686  |
| 20 | 8 | 0 | 4.001233  | 2.720827  | 0.183223  |
| 21 | 8 | 0 | -1.028973 | 1.474447  | 0.284406  |
| 22 | 8 | 0 | 1.795434  | 4.286918  | 0.530424  |
| 23 | 8 | 0 | 0.035769  | 3.009052  | 2.319458  |
| 24 | 8 | 0 | -0.196369 | 3.638716  | -1.305752 |
| 25 | 8 | 0 | -3.601122 | 1.654987  | -0.717464 |
| 26 | 8 | 0 | -5.775915 | 0.541930  | 0.491968  |
| 27 | 8 | 0 | -2.909379 | 4.363274  | -0.955753 |
| 28 | 1 | 0 | 5.705147  | 0.753230  | -0.001643 |
| 29 | 1 | 0 | 1.508793  | 1.757155  | 0.160498  |
| 30 | 1 | 0 | 3.195968  | 3.292874  | 0.290085  |
| 31 | 1 | 0 | 4.762503  | -2.739480 | -0.100676 |
| 32 | 1 | 0 | 0.890303  | -4.066147 | -0.307457 |
| 33 | 1 | 0 | 0.409340  | -1.670371 | -1.771360 |
| 34 | 1 | 0 | -1.829111 | -1.371370 | -2.282592 |
| 35 | 1 | 0 | -4.244589 | -1.511653 | -1.697951 |
| 36 | 1 | 0 | -3.208086 | -3.081813 | 2.169260  |
| 37 | 1 | 0 | -0.801011 | -2.967157 | 1.567796  |
| 38 | 1 | 0 | -5.383522 | -2.674933 | 1.425024  |
| 39 | 1 | 0 | -0.578809 | 0.612183  | 0.155406  |
| 40 | 1 | 0 | -1.058443 | 4.102589  | -1.279418 |
| 41 | 1 | 0 | 1.156886  | 4.216461  | -0.215926 |
| 42 | 1 | 0 | 1.283957  | 3.926980  | 1.287607  |
| 43 | 1 | 0 | -5.696863 | -0.428515 | 0.579919  |
| 44 | 1 | 0 | -6.001392 | 0.873362  | 1.371692  |
| 45 | 1 | 0 | -3.595258 | 1.234116  | -1.588553 |
| 46 | 1 | 0 | -4.383848 | 1.276161  | -0.243842 |
| 47 | 1 | 0 | -0.403637 | 2.788170  | -0.862940 |
| 48 | 1 | 0 | -1.970857 | 1.382250  | 0.022788  |
| 49 | 1 | 0 | -3.429851 | 4.806796  | -1.638156 |
| 50 | 1 | 0 | -3.277734 | 3.456347  | -0.881139 |
| 51 | 1 | 0 | 0.421066  | 2.429621  | 2.989954  |
| 52 | 1 | 0 | -0.421064 | 2.414268  | 1.681322  |

#### 1-4H2O

| Center Number | Atomic Number | Atomic Type | Coordinates (Angstroms) |           |           |
|---------------|---------------|-------------|-------------------------|-----------|-----------|
|               |               |             | X                       | Y         | Z         |
| 1             | 6             | 0           | -2.336904               | 2.321566  | -0.579662 |
| 2             | 6             | 0           | -1.260112               | 1.577428  | 0.007316  |
| 3             | 6             | 0           | -1.487269               | 0.180061  | 0.195389  |
| 4             | 6             | 0           | -2.643675               | -0.437152 | -0.277080 |
| 5             | 6             | 0           | -3.630577               | 0.320719  | -0.925937 |
| 6             | 6             | 0           | -3.483128               | 1.705394  | -1.071296 |
| 7             | 6             | 0           | -0.040882               | 2.298801  | 0.391903  |
| 8             | 8             | 0           | -0.109358               | 3.541961  | 0.647385  |
| 9             | 8             | 0           | -0.586227               | -0.550105 | 0.899409  |
| 10            | 8             | 0           | -4.761318               | -0.249902 | -1.396411 |
| 11            | 8             | 0           | -2.263280               | 3.671952  | -0.699617 |
| 12            | 6             | 0           | 1.298442                | 1.708854  | 0.432637  |
| 13            | 6             | 0           | 1.720259                | 0.682479  | -0.341893 |
| 14            | 6             | 0           | 3.068940                | 0.133858  | -0.413397 |
| 15            | 6             | 0           | 3.320644                | -0.938714 | -1.295797 |
| 16            | 6             | 0           | 4.582267                | -1.516589 | -1.400081 |
| 17            | 6             | 0           | 5.631945                | -1.025998 | -0.613938 |
| 18            | 6             | 0           | 5.410045                | 0.040769  | 0.272854  |
| 19            | 6             | 0           | 4.145103                | 0.608148  | 0.367902  |
| 20            | 8             | 0           | 6.854371                | -1.623599 | -0.750016 |
| 21            | 8             | 0           | -1.205637               | -3.058755 | 1.223748  |
| 22            | 8             | 0           | -3.679439               | -3.538427 | 1.151658  |
| 23            | 8             | 0           | -4.799708               | -2.854503 | -1.001444 |
| 24            | 8             | 0           | 0.167431                | 0.573787  | 3.366587  |
| 25            | 1             | 0           | -4.264633               | 2.300279  | -1.530139 |
| 26            | 1             | 0           | -2.795571               | -1.492904 | -0.101158 |
| 27            | 1             | 0           | -4.772711               | -1.242958 | -1.224438 |
| 28            | 1             | 0           | -1.464729               | 3.950616  | -0.172655 |
| 29            | 1             | 0           | 1.996077                | 2.265873  | 1.052934  |
| 30            | 1             | 0           | 0.998448                | 0.202005  | -0.997159 |
| 31            | 1             | 0           | 2.509258                | -1.324837 | -1.906359 |
| 32            | 1             | 0           | 4.765041                | -2.342335 | -2.079896 |
| 33            | 1             | 0           | 6.226772                | 0.417753  | 0.881275  |
| 34            | 1             | 0           | 3.996107                | 1.429011  | 1.061180  |

|    |   |   |           |           |           |
|----|---|---|-----------|-----------|-----------|
| 35 | 1 | 0 | 7.501937  | -1.216273 | -0.154303 |
| 36 | 1 | 0 | -0.069263 | 0.192551  | 2.495059  |
| 37 | 1 | 0 | -2.240650 | -3.265879 | 1.187840  |
| 38 | 1 | 0 | -4.358414 | -3.142575 | -0.088242 |
| 39 | 1 | 0 | -5.705684 | -3.193121 | -0.988524 |
| 40 | 1 | 0 | -0.793752 | -3.592379 | 0.529674  |
| 41 | 1 | 0 | -0.871456 | -1.518477 | 0.989247  |
| 42 | 1 | 0 | -4.077088 | -3.025144 | 1.869356  |
| 43 | 1 | 0 | 0.715052  | 1.341789  | 3.152395  |

### TS1-4H2O

| Center Number | Atomic Number | Atomic Type | Coordinates (Angstroms) |           |           |
|---------------|---------------|-------------|-------------------------|-----------|-----------|
|               |               |             | X                       | Y         | Z         |
| 1             | 6             | 0           | -2.219934               | 2.436650  | -0.457790 |
| 2             | 6             | 0           | -1.173277               | 1.651631  | 0.129933  |
| 3             | 6             | 0           | -1.382777               | 0.239489  | 0.163461  |
| 4             | 6             | 0           | -2.488063               | -0.337480 | -0.458366 |
| 5             | 6             | 0           | -3.450549               | 0.466091  | -1.082110 |
| 6             | 6             | 0           | -3.321850               | 1.859653  | -1.083511 |
| 7             | 6             | 0           | 0.013141                | 2.344017  | 0.649596  |
| 8             | 8             | 0           | -0.086582               | 3.555276  | 1.020086  |
| 9             | 8             | 0           | -0.546815               | -0.549031 | 0.883616  |
| 10            | 8             | 0           | -4.547174               | -0.079897 | -1.660849 |
| 11            | 8             | 0           | -2.162550               | 3.793383  | -0.443251 |
| 12            | 6             | 0           | 1.355471                | 1.760899  | 0.695104  |
| 13            | 6             | 0           | 1.810290                | 0.812679  | -0.157422 |
| 14            | 6             | 0           | 3.159741                | 0.269031  | -0.240741 |
| 15            | 6             | 0           | 3.427982                | -0.726057 | -1.205329 |
| 16            | 6             | 0           | 4.687051                | -1.305746 | -1.324435 |
| 17            | 6             | 0           | 5.717889                | -0.894968 | -0.470583 |
| 18            | 6             | 0           | 5.481452                | 0.098074  | 0.494536  |
| 19            | 6             | 0           | 4.218267                | 0.666999  | 0.604755  |
| 20            | 8             | 0           | 6.937775                | -1.493671 | -0.621822 |
| 21            | 8             | 0           | -0.827499               | -3.040719 | 0.411438  |
| 22            | 8             | 0           | -3.191379               | -3.417519 | 0.878023  |
| 23            | 8             | 0           | -4.643746               | -2.727610 | -1.174463 |
| 24            | 8             | 0           | -2.299801               | -1.122855 | 3.161748  |
| 25            | 1             | 0           | -4.086501               | 2.488885  | -1.524507 |
| 26            | 1             | 0           | -2.629026               | -1.405108 | -0.394677 |
| 27            | 1             | 0           | -4.581504               | -1.064049 | -1.490147 |
| 28            | 1             | 0           | -1.402023               | 4.029136  | 0.154120  |
| 29            | 1             | 0           | 2.025247                | 2.261496  | 1.389488  |
| 30            | 1             | 0           | 1.109076                | 0.395475  | -0.875687 |
| 31            | 1             | 0           | 2.630664                | -1.050992 | -1.867824 |
| 32            | 1             | 0           | 4.881844                | -2.073321 | -2.066265 |
| 33            | 1             | 0           | 6.285592                | 0.415436  | 1.151813  |
| 34            | 1             | 0           | 4.056658                | 1.428769  | 1.360122  |
| 35            | 1             | 0           | 7.568518                | -1.151965 | 0.030464  |
| 36            | 1             | 0           | -1.653888               | -0.884360 | 2.470315  |
| 37            | 1             | 0           | -1.955308               | -3.245280 | 0.615333  |
| 38            | 1             | 0           | -4.106231               | -3.008344 | -0.350746 |
| 39            | 1             | 0           | -5.551342               | -3.027478 | -1.022929 |
| 40            | 1             | 0           | -0.667575               | -3.223920 | -0.525671 |
| 41            | 1             | 0           | -0.663676               | -1.548700 | 0.643902  |
| 42            | 1             | 0           | -3.367215               | -2.774962 | 1.582551  |
| 43            | 1             | 0           | -1.960151               | -1.945352 | 3.541568  |

### INT1-4H2O

| Center Number | Atomic Number | Atomic Type | Coordinates (Angstroms) |           |           |
|---------------|---------------|-------------|-------------------------|-----------|-----------|
|               |               |             | X                       | Y         | Z         |
| 1             | 6             | 0           | 3.391978                | -1.600253 | -0.098893 |
| 2             | 6             | 0           | 2.361541                | -0.821590 | 0.470711  |
| 3             | 6             | 0           | 2.732918                | 0.330872  | 1.195165  |
| 4             | 6             | 0           | 4.065719                | 0.701867  | 1.340801  |
| 5             | 6             | 0           | 5.068114                | -0.083804 | 0.758876  |
| 6             | 6             | 0           | 4.728251                | -1.240198 | 0.038998  |
| 7             | 6             | 0           | 0.942195                | -1.117457 | 0.303257  |
| 8             | 6             | 0           | 0.392497                | -2.117102 | -0.420817 |

|    |   |   |           |           |           |
|----|---|---|-----------|-----------|-----------|
| 9  | 6 | 0 | -1.048995 | -2.400380 | -0.441799 |
| 10 | 8 | 0 | -1.374875 | -3.632063 | -0.484867 |
| 11 | 8 | 0 | 6.363422  | 0.324788  | 0.922960  |
| 12 | 6 | 0 | -2.068702 | -1.369529 | -0.312562 |
| 13 | 6 | 0 | -3.302463 | -1.719797 | 0.337184  |
| 14 | 6 | 0 | -4.246968 | -0.769907 | 0.712160  |
| 15 | 6 | 0 | -4.018793 | 0.566562  | 0.347191  |
| 16 | 6 | 0 | -2.936599 | 0.920330  | -0.446098 |
| 17 | 6 | 0 | -1.911578 | -0.000238 | -0.772337 |
| 18 | 8 | 0 | -3.560391 | -3.013308 | 0.677038  |
| 19 | 8 | 0 | -0.905226 | 0.430865  | -1.482229 |
| 20 | 8 | 0 | -4.900395 | 1.519903  | 0.779436  |
| 21 | 8 | 0 | -0.520617 | 2.824012  | -0.018689 |
| 22 | 8 | 0 | 2.088404  | 3.227562  | -1.054741 |
| 23 | 8 | 0 | 1.636102  | 0.784663  | -2.274787 |
| 24 | 8 | 0 | -3.097814 | 3.754281  | 0.975874  |
| 25 | 1 | 0 | -5.123471 | -1.058536 | 1.280963  |
| 26 | 1 | 0 | -2.840942 | 1.936721  | -0.803430 |
| 27 | 1 | 0 | -4.446503 | 2.391118  | 0.736584  |
| 28 | 1 | 0 | -2.830936 | -3.554226 | 0.267604  |
| 29 | 1 | 0 | 1.006922  | -2.867762 | -0.911338 |
| 30 | 1 | 0 | 0.269477  | -0.429240 | 0.809484  |
| 31 | 1 | 0 | 1.958603  | 0.952734  | 1.635205  |
| 32 | 1 | 0 | 4.340082  | 1.595196  | 1.892265  |
| 33 | 1 | 0 | 5.508950  | -1.848679 | -0.408293 |
| 34 | 1 | 0 | 3.151499  | -2.497241 | -0.659580 |
| 35 | 1 | 0 | 6.972217  | -0.289749 | 0.485818  |
| 36 | 1 | 0 | -0.619841 | 2.012854  | -0.570709 |
| 37 | 1 | 0 | -2.212698 | 3.490523  | 0.645706  |
| 38 | 1 | 0 | -3.301329 | 4.587179  | 0.527401  |
| 39 | 1 | 0 | 0.364718  | 3.163296  | -0.261397 |
| 40 | 1 | 0 | 1.977479  | 2.368188  | -1.531076 |
| 41 | 1 | 0 | 2.099121  | 3.906233  | -1.744216 |
| 42 | 1 | 0 | 0.744325  | 0.523422  | -1.931279 |
| 43 | 1 | 0 | 2.258757  | 0.176083  | -1.850696 |

## INT1'-4H2O

| Center Number | Atomic Number | Atomic Type | Coordinates (Angstroms) |           |           |
|---------------|---------------|-------------|-------------------------|-----------|-----------|
|               |               |             | X                       | Y         | Z         |
| 1             | 6             | 0           | 4.109840                | 0.854465  | 0.551174  |
| 2             | 6             | 0           | 3.029122                | 0.351212  | -0.204493 |
| 3             | 6             | 0           | 3.285580                | -0.728443 | -1.076190 |
| 4             | 6             | 0           | 4.555519                | -1.286342 | -1.194108 |
| 5             | 6             | 0           | 5.609465                | -0.767202 | -0.433023 |
| 6             | 6             | 0           | 5.383403                | 0.307526  | 0.442487  |
| 7             | 6             | 0           | 1.671793                | 0.881984  | -0.123545 |
| 8             | 6             | 0           | 1.236618                | 1.904290  | 0.646535  |
| 9             | 6             | 0           | -0.111206               | 2.485015  | 0.575882  |
| 10            | 8             | 0           | -0.170811               | 3.746192  | 0.768318  |
| 11            | 8             | 0           | 6.840962                | -1.345770 | -0.581626 |
| 12            | 6             | 0           | -1.311852               | 1.741179  | 0.221288  |
| 13            | 6             | 0           | -2.405128               | 2.459384  | -0.376397 |
| 14            | 6             | 0           | -3.533940               | 1.821026  | -0.876674 |
| 15            | 6             | 0           | -3.634729               | 0.427115  | -0.736365 |
| 16            | 6             | 0           | -2.646035               | -0.301703 | -0.080206 |
| 17            | 6             | 0           | -1.490199               | 0.319056  | 0.445056  |
| 18            | 8             | 0           | -2.354807               | 3.813204  | -0.503721 |
| 19            | 8             | 0           | -0.646988               | -0.402992 | 1.145429  |
| 20            | 8             | 0           | -4.745287               | -0.178686 | -1.239040 |
| 21            | 8             | 0           | 0.012167                | -2.568069 | -0.315511 |
| 22            | 8             | 0           | -2.409713               | -3.804312 | 0.434603  |
| 23            | 8             | 0           | -4.648900               | -2.906550 | -0.921654 |
| 24            | 8             | 0           | -1.976780               | -2.164530 | 2.666279  |
| 25            | 1             | 0           | -4.324901               | 2.394488  | -1.346645 |
| 26            | 1             | 0           | -2.765345               | -1.364425 | 0.071636  |
| 27            | 1             | 0           | -4.701534               | -1.158129 | -1.091839 |
| 28            | 1             | 0           | -1.540638               | 4.100786  | 0.000631  |
| 29            | 1             | 0           | 1.925253                | 2.474956  | 1.264854  |
| 30            | 1             | 0           | 0.950255                | 0.386364  | -0.767889 |
| 31            | 1             | 0           | 2.470573                | -1.138385 | -1.665832 |
| 32            | 1             | 0           | 4.740678                | -2.118299 | -1.865760 |
| 33            | 1             | 0           | 6.203380                | 0.708201  | 1.031277  |
| 34            | 1             | 0           | 3.959186                | 1.683526  | 1.234370  |

|    |   |   |           |           |           |
|----|---|---|-----------|-----------|-----------|
| 35 | 1 | 0 | 7.489645  | -0.920141 | -0.000240 |
| 36 | 1 | 0 | -1.458712 | -1.496573 | 2.128288  |
| 37 | 1 | 0 | -1.592082 | -3.486949 | -0.009198 |
| 38 | 1 | 0 | -3.859642 | -3.245399 | -0.428856 |
| 39 | 1 | 0 | -5.420564 | -3.233765 | -0.437938 |
| 40 | 1 | 0 | 0.141228  | -2.260779 | -1.223393 |
| 41 | 1 | 0 | -0.196097 | -1.747166 | 0.213623  |
| 42 | 1 | 0 | -2.369679 | -3.339454 | 1.301602  |
| 43 | 1 | 0 | -1.339257 | -2.558119 | 3.278155  |

### INT2-4H2O

| Center<br>Number | Atomic<br>Number | Atomic<br>Type | Coordinates (Angstroms) |           |           |
|------------------|------------------|----------------|-------------------------|-----------|-----------|
|                  |                  |                | X                       | Y         | Z         |
| 1                | 6                | 0              | -1.474722               | 1.341637  | 1.797836  |
| 2                | 6                | 0              | -0.656915               | 1.188428  | 0.655741  |
| 3                | 6                | 0              | -0.612927               | -0.079320 | 0.047766  |
| 4                | 6                | 0              | -1.328534               | -1.164580 | 0.551153  |
| 5                | 6                | 0              | -2.149045               | -0.970368 | 1.672720  |
| 6                | 6                | 0              | -2.213468               | 0.271948  | 2.313949  |
| 7                | 6                | 0              | 0.056932                | 2.330407  | 0.043539  |
| 8                | 6                | 0              | 0.851233                | 2.057654  | -1.043967 |
| 9                | 6                | 0              | 1.200423                | 0.639968  | -1.410207 |
| 10               | 8                | 0              | 0.084042                | -0.281240 | -1.112026 |
| 11               | 6                | 0              | 2.463628                | 0.076749  | -0.774213 |
| 12               | 6                | 0              | 2.807216                | 0.339642  | 0.559787  |
| 13               | 6                | 0              | 3.939812                | -0.233598 | 1.141435  |
| 14               | 6                | 0              | 4.758814                | -1.076227 | 0.377659  |
| 15               | 6                | 0              | 4.439014                | -1.344903 | -0.957442 |
| 16               | 6                | 0              | 3.296126                | -0.772262 | -1.518126 |
| 17               | 8                | 0              | 5.895738                | -1.661015 | 0.882772  |
| 18               | 8                | 0              | -0.161914               | 3.531425  | 0.547961  |
| 19               | 8                | 0              | -2.908260               | -1.988808 | 2.179986  |
| 20               | 8                | 0              | -1.568834               | 2.565456  | 2.387483  |
| 21               | 8                | 0              | -1.676556               | 2.037916  | -2.720772 |
| 22               | 8                | 0              | -3.626908               | 0.454792  | -1.554917 |
| 23               | 8                | 0              | -3.384892               | -3.751749 | 0.159792  |
| 24               | 8                | 0              | -3.146562               | -2.202999 | -2.107864 |
| 25               | 1                | 0              | -2.857313               | 0.415219  | 3.175061  |
| 26               | 1                | 0              | -1.261983               | -2.127674 | 0.060987  |
| 27               | 1                | 0              | -3.042851               | -2.685544 | 1.487534  |
| 28               | 1                | 0              | -1.027704               | 3.176616  | 1.761492  |
| 29               | 1                | 0              | 1.423081                | 2.848891  | -1.521289 |
| 30               | 1                | 0              | 1.302859                | 0.543095  | -2.494478 |
| 31               | 1                | 0              | 3.050299                | -0.988236 | -2.554989 |
| 32               | 1                | 0              | 5.085460                | -1.992556 | -1.541521 |
| 33               | 1                | 0              | 4.189296                | -0.024681 | 2.178405  |
| 34               | 1                | 0              | 2.186243                | 1.003541  | 1.152143  |
| 35               | 1                | 0              | 6.027416                | -1.401995 | 1.807000  |
| 36               | 1                | 0              | -3.356796               | -3.197028 | -0.659659 |
| 37               | 1                | 0              | -4.285584               | -4.101641 | 0.213195  |
| 38               | 1                | 0              | -3.297541               | -1.249233 | -1.893888 |
| 39               | 1                | 0              | -2.204671               | -2.263334 | -2.323398 |
| 40               | 1                | 0              | -2.008599               | 2.944435  | -2.795622 |
| 41               | 1                | 0              | -0.877771               | 2.103050  | -2.138232 |
| 42               | 1                | 0              | -2.917284               | 1.021309  | -1.944660 |
| 43               | 1                | 0              | -4.438916               | 0.714493  | -2.013177 |

### TS3-4H2O

| Center<br>Number | Atomic<br>Number | Atomic<br>Type | Coordinates (Angstroms) |           |           |
|------------------|------------------|----------------|-------------------------|-----------|-----------|
|                  |                  |                | X                       | Y         | Z         |
| 1                | 6                | 0              | 2.979947                | -0.577415 | -0.256615 |
| 2                | 6                | 0              | 2.348024                | -0.043825 | 0.873116  |
| 3                | 6                | 0              | 2.895380                | 1.114959  | 1.450346  |
| 4                | 6                | 0              | 4.020866                | 1.735767  | 0.912199  |
| 5                | 6                | 0              | 4.628677                | 1.192006  | -0.226852 |
| 6                | 6                | 0              | 4.112708                | 0.029390  | -0.808568 |
| 7                | 6                | 0              | 1.080241                | -0.630800 | 1.476762  |
| 8                | 8                | 0              | -0.038963               | 0.288394  | 1.179693  |



|    |   |   |           |           |           |
|----|---|---|-----------|-----------|-----------|
| 9  | 6 | 0 | -0.638841 | 0.162348  | -0.036499 |
| 10 | 6 | 0 | -0.541690 | -1.029193 | -0.790419 |
| 11 | 6 | 0 | 0.161522  | -2.188818 | -0.239584 |
| 12 | 6 | 0 | 0.691509  | -2.040780 | 1.080603  |
| 13 | 6 | 0 | -1.396950 | 1.242963  | -0.475452 |
| 14 | 6 | 0 | -2.108993 | 1.128852  | -1.679108 |
| 15 | 6 | 0 | -2.010232 | -0.018873 | -2.476588 |
| 16 | 6 | 0 | -1.235424 | -1.087176 | -2.026904 |
| 17 | 8 | 0 | 0.174246  | -3.294141 | -0.890618 |
| 18 | 8 | 0 | -2.916511 | 2.136451  | -2.114398 |
| 19 | 8 | 0 | -1.177264 | -2.218878 | -2.776820 |
| 20 | 8 | 0 | 5.733350  | 1.841881  | -0.722417 |
| 21 | 8 | 0 | -1.441053 | -2.403946 | 2.595104  |
| 22 | 8 | 0 | -3.412272 | -0.997701 | 1.526105  |
| 23 | 8 | 0 | -3.778777 | 3.421420  | 0.116153  |
| 24 | 8 | 0 | -3.344062 | 1.658920  | 2.203193  |
| 25 | 1 | 0 | -2.563405 | -0.093916 | -3.406067 |
| 26 | 1 | 0 | -1.442877 | 2.143609  | 0.122704  |
| 27 | 1 | 0 | -3.195660 | 2.694626  | -1.341891 |
| 28 | 1 | 0 | -0.644525 | -2.870889 | -2.224909 |
| 29 | 1 | 0 | 1.423778  | -2.797706 | 1.366380  |
| 30 | 1 | 0 | 1.154438  | -0.559865 | 2.564888  |
| 31 | 1 | 0 | 2.426800  | 1.542592  | 2.333171  |
| 32 | 1 | 0 | 4.435924  | 2.631815  | 1.363209  |
| 33 | 1 | 0 | 4.590851  | -0.398925 | -1.685103 |
| 34 | 1 | 0 | 2.597906  | -1.481131 | -0.718331 |
| 35 | 1 | 0 | 6.062820  | 1.390295  | -1.513901 |
| 36 | 1 | 0 | -3.674323 | 2.767800  | 0.852204  |
| 37 | 1 | 0 | -4.726966 | 3.606065  | 0.057669  |
| 38 | 1 | 0 | -3.339175 | 0.703562  | 1.937048  |
| 39 | 1 | 0 | -2.432337 | 1.847279  | 2.468372  |
| 40 | 1 | 0 | -1.669589 | -3.344034 | 2.538837  |
| 41 | 1 | 0 | -0.432562 | -2.282699 | 1.851560  |
| 42 | 1 | 0 | -2.659354 | -1.540407 | 1.928782  |
| 43 | 1 | 0 | -4.221763 | -1.353708 | 1.918789  |

## 2-4H2O

| Center<br>Number | Atomic<br>Number | Atomic<br>Type | Coordinates (Angstroms) |           |           |
|------------------|------------------|----------------|-------------------------|-----------|-----------|
|                  |                  |                | X                       | Y         | Z         |
| 1                | 6                | 0              | 3.161218                | -1.334875 | -1.355539 |
| 2                | 6                | 0              | 2.565235                | -0.122399 | -0.969614 |
| 3                | 6                | 0              | 3.078549                | 0.533735  | 0.158583  |
| 4                | 6                | 0              | 4.146846                | -0.000873 | 0.883012  |
| 5                | 6                | 0              | 4.720721                | -1.212383 | 0.481926  |
| 6                | 6                | 0              | 4.226645                | -1.882698 | -0.643767 |
| 7                | 6                | 0              | 1.376348                | 0.377298  | -1.765291 |
| 8                | 6                | 0              | 1.089173                | 1.877058  | -1.710659 |
| 9                | 6                | 0              | 0.447044                | 2.317475  | -0.419050 |
| 10               | 6                | 0              | -0.338705               | 1.338935  | 0.283465  |
| 11               | 6                | 0              | -0.459819               | 0.014173  | -0.223683 |
| 12               | 8                | 0              | 0.172583                | -0.372578 | -1.362386 |
| 13               | 6                | 0              | -1.265805               | -0.926154 | 0.400384  |
| 14               | 6                | 0              | -1.981481               | -0.554142 | 1.554426  |
| 15               | 6                | 0              | -1.868554               | 0.734142  | 2.103179  |
| 16               | 6                | 0              | -1.057756               | 1.667701  | 1.473604  |
| 17               | 8                | 0              | -0.967856               | 2.913727  | 1.993442  |
| 18               | 8                | 0              | -2.791601               | -1.424418 | 2.190702  |
| 19               | 8                | 0              | 0.570670                | 3.502846  | -0.019323 |
| 20               | 8                | 0              | 5.775000                | -1.786714 | 1.147049  |
| 21               | 8                | 0              | -3.275853               | -3.551790 | 0.667178  |
| 22               | 8                | 0              | -3.842440               | -2.255709 | -1.581246 |
| 23               | 8                | 0              | -4.761636               | -0.077457 | -0.777586 |
| 24               | 8                | 0              | -3.129112               | 1.762736  | -1.661498 |
| 25               | 1                | 0              | -2.423594               | 0.999537  | 2.995463  |
| 26               | 1                | 0              | -1.334191               | -1.928056 | -0.003079 |
| 27               | 1                | 0              | -2.936249               | -2.253784 | 1.649391  |
| 28               | 1                | 0              | -0.375924               | 3.433863  | 1.386766  |
| 29               | 1                | 0              | 2.001733                | 2.451968  | -1.883000 |
| 30               | 1                | 0              | 1.500982                | 0.076942  | -2.806135 |
| 31               | 1                | 0              | 2.786756                | -1.860106 | -2.230260 |
| 32               | 1                | 0              | 4.684133                | -2.817091 | -0.953043 |
| 33               | 1                | 0              | 4.531347                | 0.523224  | 1.753447  |
| 34               | 1                | 0              | 2.661919                | 1.477719  | 0.490045  |

|    |   |   |           |           |           |
|----|---|---|-----------|-----------|-----------|
| 35 | 1 | 0 | 6.038148  | -1.235946 | 1.899844  |
| 36 | 1 | 0 | -3.522907 | -3.106974 | -0.199472 |
| 37 | 1 | 0 | -4.069550 | -4.017163 | 0.967423  |
| 38 | 1 | 0 | -4.242491 | -1.317976 | -1.256608 |
| 39 | 1 | 0 | -2.988447 | -2.051702 | -1.987928 |
| 40 | 1 | 0 | -2.346869 | 1.725806  | -1.092137 |
| 41 | 1 | 0 | 0.379614  | 2.130768  | -2.508504 |
| 42 | 1 | 0 | -3.758649 | 1.045347  | -1.305755 |
| 43 | 1 | 0 | -5.621767 | 0.076550  | -1.192976 |

wB97XD (PCM, solvent=n-octanol) /6-311+G(d,p)

1

| Center<br>Number | Atomic<br>Number | Atomic<br>Type | Coordinates (Angstroms) |           |           |
|------------------|------------------|----------------|-------------------------|-----------|-----------|
|                  |                  |                | X                       | Y         | Z         |
| 1                | 6                | 0              | -3.979565               | -1.444565 | -0.182550 |
| 2                | 6                | 0              | -4.167048               | -0.210280 | -0.792298 |
| 3                | 6                | 0              | -3.247203               | 0.806334  | -0.556400 |
| 4                | 6                | 0              | -2.077766               | 0.591240  | 0.228019  |
| 5                | 6                | 0              | -1.969075               | -0.659277 | 0.881402  |
| 6                | 6                | 0              | -2.898440               | -1.672272 | 0.674373  |
| 7                | 8                | 0              | -4.904798               | -2.399648 | -0.429919 |
| 8                | 8                | 0              | -3.496996               | 1.997406  | -1.121931 |
| 9                | 8                | 0              | -0.954855               | -0.834920 | 1.760038  |
| 10               | 6                | 0              | -1.086603               | 1.682257  | 0.317174  |
| 11               | 6                | 0              | 0.359049                | 1.449836  | 0.434531  |
| 12               | 6                | 0              | 0.973023                | 0.359664  | -0.055804 |
| 13               | 6                | 0              | 2.862921                | -1.078347 | -0.714651 |
| 14               | 6                | 0              | 2.411930                | 0.102778  | -0.109838 |
| 15               | 6                | 0              | 3.374620                | 0.978256  | 0.422453  |
| 16               | 6                | 0              | 4.726318                | 0.686468  | 0.351457  |
| 17               | 6                | 0              | 5.152555                | -0.498314 | -0.259231 |
| 18               | 6                | 0              | 4.216411                | -1.384523 | -0.793709 |
| 19               | 8                | 0              | 6.489367                | -0.729927 | -0.299230 |
| 20               | 8                | 0              | -1.467029               | 2.863980  | 0.194707  |
| 21               | 1                | 0              | -5.032688               | -0.025517 | -1.416410 |
| 22               | 1                | 0              | -2.795563               | -2.621117 | 1.193126  |
| 23               | 1                | 0              | -4.694802               | -3.211245 | 0.044852  |
| 24               | 1                | 0              | -2.857859               | 2.638878  | -0.735353 |
| 25               | 1                | 0              | -1.009183               | -1.709771 | 2.159528  |
| 26               | 1                | 0              | 0.912764                | 2.304815  | 0.811713  |
| 27               | 1                | 0              | 0.353333                | -0.428893 | -0.478643 |
| 28               | 1                | 0              | 2.140748                | -1.773644 | -1.133485 |
| 29               | 1                | 0              | 3.068703                | 1.902111  | 0.902261  |
| 30               | 1                | 0              | 5.465478                | 1.364713  | 0.763932  |
| 31               | 1                | 0              | 4.541315                | -2.305983 | -1.268038 |
| 32               | 1                | 0              | 6.675480                | -1.565006 | -0.742376 |

2

| Center<br>Number | Atomic<br>Number | Atomic<br>Type | Coordinates (Angstroms) |           |           |
|------------------|------------------|----------------|-------------------------|-----------|-----------|
|                  |                  |                | X                       | Y         | Z         |
| 1                | 8                | 0              | 0.055831                | -0.756406 | 0.008556  |
| 2                | 6                | 0              | -0.688107               | 0.395742  | 0.455703  |
| 3                | 6                | 0              | -0.221613               | 1.642145  | -0.289941 |
| 4                | 6                | 0              | 1.269248                | 1.823115  | -0.161153 |
| 5                | 6                | 0              | 3.466787                | 0.640804  | -0.004678 |
| 6                | 6                | 0              | 4.203771                | -0.534465 | 0.027070  |
| 7                | 6                | 0              | 3.525810                | -1.754469 | 0.041376  |
| 8                | 6                | 0              | 2.127954                | -1.827997 | 0.040875  |
| 9                | 6                | 0              | 1.401855                | -0.647857 | 0.017411  |
| 10               | 6                | 0              | 2.044687                | 0.612120  | -0.014179 |
| 11               | 8                | 0              | 1.787956                | 2.948656  | -0.220614 |
| 12               | 8                | 0              | 4.118549                | 1.809656  | -0.041155 |
| 13               | 8                | 0              | 4.288831                | -2.867936 | 0.068643  |
| 14               | 6                | 0              | -2.151430               | 0.101122  | 0.264422  |
| 15               | 6                | 0              | -3.046469               | 0.242944  | 1.325789  |

|    |   |   |           |           |           |
|----|---|---|-----------|-----------|-----------|
| 16 | 6 | 0 | -4.407147 | 0.011287  | 1.153180  |
| 17 | 6 | 0 | -4.886053 | -0.379765 | -0.096699 |
| 18 | 6 | 0 | -4.002000 | -0.534849 | -1.167746 |
| 19 | 6 | 0 | -2.646354 | -0.289143 | -0.982151 |
| 20 | 8 | 0 | -6.224116 | -0.599653 | -0.215124 |
| 21 | 1 | 0 | -0.478163 | 0.520113  | 1.526401  |
| 22 | 1 | 0 | -0.457479 | 1.553780  | -1.358390 |
| 23 | 1 | 0 | -0.733174 | 2.528417  | 0.091710  |
| 24 | 1 | 0 | 5.286466  | -0.505523 | 0.031223  |
| 25 | 1 | 0 | 1.607496  | -2.778644 | 0.074485  |
| 26 | 1 | 0 | 3.438903  | 2.522488  | -0.100458 |
| 27 | 1 | 0 | 3.738617  | -3.659359 | 0.070052  |
| 28 | 1 | 0 | -2.680776 | 0.539502  | 2.305056  |
| 29 | 1 | 0 | -5.101775 | 0.123399  | 1.978707  |
| 30 | 1 | 0 | -4.371707 | -0.844495 | -2.141231 |
| 31 | 1 | 0 | -1.967328 | -0.415675 | -1.820255 |
| 32 | 1 | 0 | -6.443116 | -0.862946 | -1.115425 |

(1,1)-a

| Center<br>Number | Atomic<br>Number | Atomic<br>Type | Coordinates (Angstroms) |           |           |
|------------------|------------------|----------------|-------------------------|-----------|-----------|
|                  |                  |                | X                       | Y         | Z         |
| 1                | 6                | 0              | -0.345853               | -4.060586 | -0.838704 |
| 2                | 6                | 0              | 0.222011                | -3.449198 | 0.288168  |
| 3                | 6                | 0              | -0.584098               | -3.271166 | 1.420998  |
| 4                | 6                | 0              | -1.908277               | -3.694451 | 1.437707  |
| 5                | 6                | 0              | -2.452851               | -4.278950 | 0.296112  |
| 6                | 6                | 0              | -1.672336               | -4.470342 | -0.843254 |
| 7                | 6                | 0              | 1.604490                | -2.954608 | 0.288393  |
| 8                | 8                | 0              | 2.290364                | -0.578403 | -1.093200 |
| 9                | 6                | 0              | 3.491322                | -0.368090 | -0.505878 |
| 10               | 6                | 0              | 4.327064                | -1.480412 | -0.219454 |
| 11               | 6                | 0              | 3.974123                | -2.886924 | -0.450466 |
| 12               | 6                | 0              | 2.584369                | -3.379481 | -0.520200 |
| 13               | 6                | 0              | 5.637003                | -1.177107 | 0.271353  |
| 14               | 6                | 0              | 6.040327                | 0.124621  | 0.550822  |
| 15               | 6                | 0              | 5.169273                | 1.175376  | 0.284688  |
| 16               | 6                | 0              | 3.897613                | 0.931057  | -0.242806 |
| 17               | 8                | 0              | 4.873612                | -3.747045 | -0.555829 |
| 18               | 8                | 0              | 6.533415                | -2.147916 | 0.489676  |
| 19               | 8                | 0              | 5.600488                | 2.427739  | 0.526006  |
| 20               | 8                | 0              | -3.788175               | -4.594426 | 0.323730  |
| 21               | 8                | 0              | -5.545188               | -2.453416 | -0.437730 |
| 22               | 6                | 0              | -5.136199               | -1.187633 | -0.232704 |
| 23               | 6                | 0              | -5.980713               | -0.161963 | -0.644506 |
| 24               | 6                | 0              | -5.604959               | 1.157697  | -0.418538 |
| 25               | 6                | 0              | -4.342688               | 1.498360  | 0.161032  |
| 26               | 6                | 0              | -3.538449               | 0.414634  | 0.602755  |
| 27               | 6                | 0              | -3.920068               | -0.903132 | 0.398057  |
| 28               | 6                | 0              | -3.999801               | 2.917939  | 0.308847  |
| 29               | 6                | 0              | -2.612034               | 3.409834  | 0.422213  |
| 30               | 6                | 0              | -1.596468               | 2.926705  | -0.305344 |
| 31               | 8                | 0              | -2.399516               | 0.681689  | 1.282726  |
| 32               | 6                | 0              | -0.213920               | 3.421526  | -0.268636 |
| 33               | 6                | 0              | 0.632718                | 3.223745  | -1.368436 |
| 34               | 6                | 0              | 1.954580                | 3.654686  | -1.346785 |
| 35               | 6                | 0              | 2.456833                | 4.262531  | -0.197186 |
| 36               | 6                | 0              | 1.634774                | 4.474018  | 0.908601  |
| 37               | 6                | 0              | 0.310201                | 4.059347  | 0.864344  |
| 38               | 8                | 0              | -4.898653               | 3.783985  | 0.289114  |
| 39               | 8                | 0              | -6.476588               | 2.108087  | -0.781240 |
| 40               | 8                | 0              | 3.792478                | 4.576512  | -0.180754 |
| 41               | 1                | 0              | -1.785469               | 2.096551  | -0.984184 |
| 42               | 1                | 0              | -2.500345               | 4.298125  | 1.038363  |
| 43               | 1                | 0              | -6.939558               | -0.380645 | -1.098267 |
| 44               | 1                | 0              | -3.285778               | -1.708172 | 0.752579  |
| 45               | 1                | 0              | -6.128963               | 2.963741  | -0.429271 |
| 46               | 1                | 0              | -4.910411               | -3.100029 | -0.079831 |
| 47               | 1                | 0              | 0.249642                | 2.733602  | -2.259289 |
| 48               | 1                | 0              | 2.604650                | 3.509391  | -2.203325 |
| 49               | 1                | 0              | 2.032106                | 4.934740  | 1.807968  |
| 50               | 1                | 0              | -0.311397               | 4.201319  | 1.742467  |
| 51               | 1                | 0              | 3.985448                | 5.183832  | 0.544052  |

|    |   |   |           |           |           |
|----|---|---|-----------|-----------|-----------|
| 52 | 1 | 0 | 1.824678  | -2.170830 | 1.011155  |
| 53 | 1 | 0 | 2.445801  | -4.224239 | -1.189756 |
| 54 | 1 | 0 | 7.038955  | 0.311144  | 0.926401  |
| 55 | 1 | 0 | 3.234499  | 1.755960  | -0.476180 |
| 56 | 1 | 0 | 6.151547  | -2.978236 | 0.111190  |
| 57 | 1 | 0 | 4.951081  | 3.090492  | 0.229280  |
| 58 | 1 | 0 | -0.167433 | -2.800141 | 2.306836  |
| 59 | 1 | 0 | -2.526192 | -3.565765 | 2.320371  |
| 60 | 1 | 0 | -2.103440 | -4.912374 | -1.736459 |
| 61 | 1 | 0 | 0.241829  | -4.186893 | -1.742131 |
| 62 | 1 | 0 | -4.005312 | -5.198999 | -0.396536 |
| 63 | 1 | 0 | 1.855207  | 0.267518  | -1.250628 |
| 64 | 1 | 0 | -1.976975 | -0.142754 | 1.548049  |

(1,1)-b

| Center Number | Atomic Number | Atomic Type | Coordinates (Angstroms) |           |           |
|---------------|---------------|-------------|-------------------------|-----------|-----------|
|               |               |             | X                       | Y         | Z         |
| 1             | 6             | 0           | 3.738669                | -2.712214 | -0.752688 |
| 2             | 6             | 0           | 3.887182                | -2.666985 | 0.626170  |
| 3             | 6             | 0           | 2.927451                | -2.010165 | 1.389416  |
| 4             | 6             | 0           | 1.751792                | -1.455022 | 0.804428  |
| 5             | 6             | 0           | 1.679596                | -1.476359 | -0.608595 |
| 6             | 6             | 0           | 2.646560                | -2.107846 | -1.380155 |
| 7             | 8             | 0           | 4.707522                | -3.340670 | -1.457616 |
| 8             | 8             | 0           | 3.147735                | -1.942493 | 2.709895  |
| 9             | 8             | 0           | 0.656056                | -0.827230 | -1.217837 |
| 10            | 6             | 0           | 0.737424                | -0.875647 | 1.707201  |
| 11            | 6             | 0           | -0.704611               | -0.868139 | 1.425960  |
| 12            | 6             | 0           | -1.334876               | -1.768701 | 0.656379  |
| 13            | 6             | 0           | -3.257479               | -2.620487 | -0.628732 |
| 14            | 6             | 0           | -2.779878               | -1.858526 | 0.444648  |
| 15            | 6             | 0           | -3.717260               | -1.181121 | 1.241544  |
| 16            | 6             | 0           | -5.071563               | -1.240696 | 0.961369  |
| 17            | 6             | 0           | -5.522748               | -1.979431 | -0.136378 |
| 18            | 6             | 0           | -4.613463               | -2.679784 | -0.929479 |
| 19            | 8             | 0           | -6.860388               | -1.974563 | -0.383553 |
| 20            | 8             | 0           | 1.090470                | -0.437207 | 2.820027  |
| 21            | 1             | 0           | 4.760835                | -3.091841 | 1.104861  |
| 22            | 1             | 0           | 2.571073                | -2.096923 | -2.463962 |
| 23            | 1             | 0           | 4.547852                | -3.257540 | -2.403888 |
| 24            | 1             | 0           | 2.499230                | -1.293849 | 3.071565  |
| 25            | 1             | 0           | 0.795688                | -0.824087 | -2.170852 |
| 26            | 1             | 0           | -1.253418               | -0.130645 | 2.004427  |
| 27            | 1             | 0           | -0.738746               | -2.497032 | 0.110817  |
| 28            | 1             | 0           | -2.553953               | -3.164154 | -1.253321 |
| 29            | 1             | 0           | -3.388004               | -0.594145 | 2.092628  |
| 30            | 1             | 0           | -5.791142               | -0.706577 | 1.572355  |
| 31            | 1             | 0           | -4.960220               | -3.265775 | -1.775754 |
| 32            | 1             | 0           | -7.067554               | -2.544172 | -1.132598 |
| 33            | 6             | 0           | 4.255478                | 0.825643  | -1.613790 |
| 34            | 6             | 0           | 4.461440                | 0.770249  | -0.243671 |
| 35            | 6             | 0           | 3.574976                | 1.431705  | 0.600288  |
| 36            | 6             | 0           | 2.426216                | 2.112097  | 0.101122  |
| 37            | 6             | 0           | 2.307074                | 2.204241  | -1.305556 |
| 38            | 6             | 0           | 3.196272                | 1.558855  | -2.157138 |
| 39            | 8             | 0           | 5.138202                | 0.165612  | -2.400204 |
| 40            | 8             | 0           | 3.841526                | 1.382751  | 1.912321  |
| 41            | 8             | 0           | 1.326078                | 2.984792  | -1.820252 |
| 42            | 6             | 0           | 1.477665                | 2.692294  | 1.076063  |
| 43            | 6             | 0           | 0.033922                | 2.802427  | 0.835046  |
| 44            | 6             | 0           | -0.640847               | 1.982876  | 0.010936  |
| 45            | 6             | 0           | -2.587612               | 1.096813  | -1.204793 |
| 46            | 6             | 0           | -2.088330               | 1.915936  | -0.183024 |
| 47            | 6             | 0           | -3.012473               | 2.621254  | 0.605366  |
| 48            | 6             | 0           | -4.375248               | 2.513321  | 0.380269  |
| 49            | 6             | 0           | -4.847704               | 1.691133  | -0.647424 |
| 50            | 6             | 0           | -3.949577               | 0.989708  | -1.451318 |
| 51            | 8             | 0           | -6.194276               | 1.603897  | -0.803349 |
| 52            | 8             | 0           | 1.896076                | 3.034147  | 2.201042  |
| 53            | 1             | 0           | 5.299256                | 0.224388  | 0.171440  |
| 54            | 1             | 0           | 3.084228                | 1.651568  | -3.233984 |
| 55            | 1             | 0           | 4.925111                | 0.293310  | -3.330860 |

|    |   |   |           |          |           |
|----|---|---|-----------|----------|-----------|
| 56 | 1 | 0 | 3.216441  | 1.999775 | 2.356955  |
| 57 | 1 | 0 | 1.394881  | 3.009253 | -2.780639 |
| 58 | 1 | 0 | -0.469143 | 3.505668 | 1.493057  |
| 59 | 1 | 0 | -0.075449 | 1.262505 | -0.574230 |
| 60 | 1 | 0 | -1.893178 | 0.519826 | -1.808579 |
| 61 | 1 | 0 | -2.667820 | 3.251545 | 1.419001  |
| 62 | 1 | 0 | -5.087392 | 3.044450 | 1.002728  |
| 63 | 1 | 0 | -4.313657 | 0.336655 | -2.239137 |
| 64 | 1 | 0 | -6.415215 | 0.930926 | -1.456609 |

**(1,1)-g**

| Center<br>Number | Atomic<br>Number | Atomic<br>Type | Coordinates (Angstroms) |           |           |
|------------------|------------------|----------------|-------------------------|-----------|-----------|
|                  |                  |                | X                       | Y         | Z         |
| 1                | 8                | 0              | -0.837068               | -1.001847 | 1.157323  |
| 2                | 6                | 0              | 1.391284                | -1.905029 | -0.345434 |
| 3                | 6                | 0              | 0.975186                | -0.906917 | -1.141407 |
| 4                | 6                | 0              | -0.369336               | -0.809550 | -1.719886 |
| 5                | 6                | 0              | -2.690119               | -1.686887 | -1.916162 |
| 6                | 6                | 0              | -3.855084               | -2.246892 | -1.404191 |
| 7                | 6                | 0              | -3.984782               | -2.391727 | -0.029291 |
| 8                | 6                | 0              | -2.968803               | -1.984265 | 0.837826  |
| 9                | 6                | 0              | -1.795007               | -1.454358 | 0.318673  |
| 10               | 6                | 0              | -1.589029               | -1.332062 | -1.079975 |
| 11               | 8                | 0              | -0.447602               | -0.298452 | -2.859857 |
| 12               | 8                | 0              | -2.644093               | -1.496392 | -3.243337 |
| 13               | 8                | 0              | -5.141698               | -2.917355 | 0.430643  |
| 14               | 6                | 0              | 2.748886                | -2.102584 | 0.162277  |
| 15               | 6                | 0              | 3.030692                | -3.245152 | 0.927109  |
| 16               | 6                | 0              | 4.297054                | -3.477825 | 1.445285  |
| 17               | 6                | 0              | 5.317088                | -2.555605 | 1.206212  |
| 18               | 6                | 0              | 5.059726                | -1.407205 | 0.450135  |
| 19               | 6                | 0              | 3.790520                | -1.189527 | -0.063220 |
| 20               | 8                | 0              | 6.539312                | -2.821149 | 1.735080  |
| 21               | 1                | 0              | 0.670052                | -2.658821 | -0.037340 |
| 22               | 1                | 0              | 1.668148                | -0.168618 | -1.533771 |
| 23               | 1                | 0              | -4.663633               | -2.520816 | -2.070757 |
| 24               | 1                | 0              | -3.105256               | -2.050131 | 1.913320  |
| 25               | 1                | 0              | -1.829317               | -0.965392 | -3.422527 |
| 26               | 1                | 0              | -5.152719               | -2.925603 | 1.394181  |
| 27               | 1                | 0              | 2.240510                | -3.965609 | 1.120002  |
| 28               | 1                | 0              | 4.506771                | -4.363421 | 2.035301  |
| 29               | 1                | 0              | 5.848766                | -0.682386 | 0.269192  |
| 30               | 1                | 0              | 3.615605                | -0.286644 | -0.639080 |
| 31               | 1                | 0              | 7.162780                | -2.121910 | 1.510256  |
| 32               | 8                | 0              | -1.986988               | 2.098916  | -1.419949 |
| 33               | 6                | 0              | 1.305173                | 2.352377  | 0.949029  |
| 34               | 6                | 0              | 0.068958                | 2.139341  | 0.463724  |
| 35               | 6                | 0              | -1.092504               | 2.132861  | 1.370241  |
| 36               | 6                | 0              | -3.452237               | 1.511149  | 1.879612  |
| 37               | 6                | 0              | -4.725335               | 1.076981  | 1.523252  |
| 38               | 6                | 0              | -5.046966               | 0.954696  | 0.179224  |
| 39               | 6                | 0              | -4.126788               | 1.295692  | -0.814969 |
| 40               | 6                | 0              | -2.859094               | 1.727213  | -0.454854 |
| 41               | 6                | 0              | -2.453206               | 1.824267  | 0.903054  |
| 42               | 8                | 0              | -0.899966               | 2.334704  | 2.592725  |
| 43               | 8                | 0              | -3.188763               | 1.594578  | 3.188362  |
| 44               | 8                | 0              | -6.287116               | 0.513049  | -0.124080 |
| 45               | 6                | 0              | 2.550239                | 2.338364  | 0.181871  |
| 46               | 6                | 0              | 3.773694                | 2.318955  | 0.869491  |
| 47               | 6                | 0              | 4.985189                | 2.261760  | 0.195370  |
| 48               | 6                | 0              | 4.995797                | 2.227808  | -1.199861 |
| 49               | 6                | 0              | 3.790234                | 2.267094  | -1.909556 |
| 50               | 6                | 0              | 2.586671                | 2.326614  | -1.221379 |
| 51               | 8                | 0              | 6.203973                | 2.161983  | -1.815367 |
| 52               | 1                | 0              | 1.406459                | 2.530301  | 2.017915  |
| 53               | 1                | 0              | -0.100331               | 1.925083  | -0.580002 |
| 54               | 1                | 0              | -5.445353               | 0.826792  | 2.292735  |
| 55               | 1                | 0              | -4.398526               | 1.229097  | -1.864425 |
| 56               | 1                | 0              | -2.254303               | 1.939137  | 3.257106  |
| 57               | 1                | 0              | -6.390684               | 0.417670  | -1.077436 |
| 58               | 1                | 0              | 3.773733                | 2.334128  | 1.955635  |
| 59               | 1                | 0              | 5.925215                | 2.237065  | 0.736041  |

|    |   |   |           |           |           |
|----|---|---|-----------|-----------|-----------|
| 60 | 1 | 0 | 3.794593  | 2.254802  | -2.995648 |
| 61 | 1 | 0 | 1.664849  | 2.369582  | -1.793008 |
| 62 | 1 | 0 | 6.096747  | 2.149281  | -2.772885 |
| 63 | 1 | 0 | -2.325267 | 1.862330  | -2.290657 |
| 64 | 1 | 0 | -1.137366 | -1.067703 | 2.070309  |

**(1,1)-g'**

| Center<br>Number | Atomic<br>Number | Atomic<br>Type | Coordinates (Angstroms) |           |           |
|------------------|------------------|----------------|-------------------------|-----------|-----------|
|                  |                  |                | X                       | Y         | Z         |
| 1                | 8                | 0              | 5.197464                | 0.712852  | -2.032605 |
| 2                | 6                | 0              | 2.408275                | 1.110427  | -1.135019 |
| 3                | 6                | 0              | 2.983151                | 2.209318  | -0.613027 |
| 4                | 6                | 0              | 4.170769                | 2.182474  | 0.243068  |
| 5                | 6                | 0              | 5.598830                | 0.653973  | 1.587432  |
| 6                | 6                | 0              | 6.337460                | -0.512666 | 1.763019  |
| 7                | 6                | 0              | 6.686114                | -1.266348 | 0.645725  |
| 8                | 6                | 0              | 6.316689                | -0.866005 | -0.640587 |
| 9                | 6                | 0              | 5.536171                | 0.274052  | -0.798383 |
| 10               | 6                | 0              | 5.103408                | 1.033858  | 0.309618  |
| 11               | 8                | 0              | 4.309291                | 3.114809  | 1.059216  |
| 12               | 8                | 0              | 5.337811                | 1.384003  | 2.685177  |
| 13               | 8                | 0              | 7.421216                | -2.378905 | 0.864939  |
| 14               | 6                | 0              | 1.073424                | 1.019677  | -1.720648 |
| 15               | 6                | 0              | 0.107751                | 2.024339  | -1.557027 |
| 16               | 6                | 0              | -1.185994               | 1.849805  | -2.018469 |
| 17               | 6                | 0              | -1.552610               | 0.650718  | -2.640521 |
| 18               | 6                | 0              | -0.594276               | -0.337100 | -2.861850 |
| 19               | 6                | 0              | 0.699472                | -0.151599 | -2.394364 |
| 20               | 8                | 0              | -2.829664               | 0.417329  | -3.041853 |
| 21               | 1                | 0              | 2.944747                | 0.166512  | -1.080390 |
| 22               | 1                | 0              | 2.485623                | 3.174845  | -0.629221 |
| 23               | 1                | 0              | 6.675088                | -0.799015 | 2.751507  |
| 24               | 1                | 0              | 6.639519                | -1.431193 | -1.509952 |
| 25               | 1                | 0              | 4.970058                | 2.242545  | 2.379906  |
| 26               | 1                | 0              | 7.606777                | -2.836557 | 0.037651  |
| 27               | 1                | 0              | 0.355575                | 2.943526  | -1.036406 |
| 28               | 1                | 0              | -1.919143               | 2.639538  | -1.890872 |
| 29               | 1                | 0              | -0.886351               | -1.261986 | -3.347443 |
| 30               | 1                | 0              | 1.427737                | -0.947294 | -2.521781 |
| 31               | 1                | 0              | -3.433160               | 0.868034  | -2.431971 |
| 32               | 8                | 0              | -3.865671               | 1.316507  | -0.454493 |
| 33               | 6                | 0              | -2.250347               | -1.026991 | 0.447168  |
| 34               | 6                | 0              | -3.042368               | -1.581916 | -0.486411 |
| 35               | 6                | 0              | -4.509066               | -1.521277 | -0.502491 |
| 36               | 6                | 0              | -6.537632               | -0.844407 | 0.772759  |
| 37               | 6                | 0              | -7.268776               | 0.047726  | 1.551137  |
| 38               | 6                | 0              | -6.827460               | 1.359069  | 1.673446  |
| 39               | 6                | 0              | -5.679837               | 1.799358  | 1.005981  |

**(1,1)-g''**

| Center<br>Number | Atomic<br>Number | Atomic<br>Type | Coordinates (Angstroms) |           |           |
|------------------|------------------|----------------|-------------------------|-----------|-----------|
|                  |                  |                | X                       | Y         | Z         |
| 1                | 8                | 0              | -2.314836               | -0.155961 | 2.949339  |
| 2                | 6                | 0              | -0.027788               | -0.507495 | 1.274299  |
| 3                | 6                | 0              | -0.070131               | 0.829738  | 1.387679  |
| 4                | 6                | 0              | -1.205048               | 1.648465  | 0.957268  |
| 5                | 6                | 0              | -3.556950               | 1.879629  | 0.180763  |
| 6                | 6                | 0              | -4.888211               | 1.479584  | 0.139056  |
| 7                | 6                | 0              | -5.321179               | 0.480419  | 0.997963  |
| 8                | 6                | 0              | -4.458697               | -0.088626 | 1.940870  |
| 9                | 6                | 0              | -3.133096               | 0.318020  | 1.985409  |
| 10               | 6                | 0              | -2.612687               | 1.268670  | 1.064167  |
| 11               | 8                | 0              | -0.899871               | 2.726624  | 0.374067  |
| 12               | 8                | 0              | -3.194857               | 2.845393  | -0.669429 |
| 13               | 8                | 0              | -6.613024               | 0.098437  | 0.896272  |
| 14               | 6                | 0              | 1.158238                | -1.350083 | 1.396813  |
| 15               | 6                | 0              | 2.458349                | -0.833024 | 1.534777  |
| 16               | 6                | 0              | 3.561265                | -1.667533 | 1.571312  |

|    |   |   |           |           |           |
|----|---|---|-----------|-----------|-----------|
| 17 | 6 | 0 | 3.389837  | -3.052804 | 1.472193  |
| 18 | 6 | 0 | 2.108155  | -3.591875 | 1.343695  |
| 19 | 6 | 0 | 1.010602  | -2.740419 | 1.305124  |
| 20 | 8 | 0 | 4.507961  | -3.819512 | 1.505103  |
| 21 | 1 | 0 | -0.941519 | -1.034116 | 1.009574  |
| 22 | 1 | 0 | 0.826717  | 1.407522  | 1.593335  |
| 23 | 1 | 0 | -5.568591 | 1.941088  | -0.565850 |
| 24 | 1 | 0 | -4.826547 | -0.827562 | 2.646874  |
| 25 | 1 | 0 | -2.257863 | 3.077205  | -0.458603 |
| 26 | 1 | 0 | -6.815464 | -0.597786 | 1.531330  |
| 27 | 1 | 0 | 2.621356  | 0.238662  | 1.588545  |
| 28 | 1 | 0 | 4.562948  | -1.260351 | 1.657955  |
| 29 | 1 | 0 | 1.970369  | -4.666375 | 1.265747  |
| 30 | 1 | 0 | 0.016360  | -3.165578 | 1.197201  |
| 31 | 1 | 0 | 4.282395  | -4.752443 | 1.421244  |
| 32 | 8 | 0 | 1.147267  | 2.102105  | -1.321082 |
| 33 | 6 | 0 | 0.134443  | -0.269131 | -2.315550 |
| 34 | 6 | 0 | 1.288574  | -0.826482 | -1.933248 |
| 35 | 6 | 0 | 2.677278  | -0.304211 | -2.034041 |
| 36 | 6 | 0 | 4.534267  | 0.837445  | -0.857057 |
| 37 | 6 | 0 | 5.005378  | 1.711658  | 0.118368  |
| 38 | 6 | 0 | 4.149901  | 2.674413  | 0.639676  |
| 39 | 6 | 0 | 2.838425  | 2.804774  | 0.173598  |
| 40 | 6 | 0 | 2.369303  | 1.926821  | -0.797490 |
| 41 | 6 | 0 | 3.173172  | 0.869544  | -1.300869 |
| 42 | 8 | 0 | 3.492640  | -1.066628 | -2.595149 |
| 43 | 8 | 0 | 5.398953  | -0.071457 | -1.318601 |
| 44 | 8 | 0 | 4.652574  | 3.497487  | 1.586835  |
| 45 | 6 | 0 | -1.204692 | -0.838685 | -2.116724 |
| 46 | 6 | 0 | -1.441360 | -2.076106 | -1.496440 |
| 47 | 6 | 0 | -2.728273 | -2.504566 | -1.210238 |
| 48 | 6 | 0 | -3.820881 | -1.702680 | -1.554469 |
| 49 | 6 | 0 | -3.613654 | -0.493404 | -2.215119 |
| 50 | 6 | 0 | -2.316566 | -0.070173 | -2.480706 |
| 51 | 8 | 0 | -5.060244 | -2.155267 | -1.221985 |
| 52 | 1 | 0 | 0.150976  | 0.714586  | -2.769195 |
| 53 | 1 | 0 | 1.306635  | -1.836557 | -1.527128 |
| 54 | 1 | 0 | 6.030318  | 1.636015  | 0.460235  |
| 55 | 1 | 0 | 2.199954  | 3.611136  | 0.521485  |
| 56 | 1 | 0 | 4.902445  | -0.624412 | -1.976365 |
| 57 | 1 | 0 | 3.985455  | 4.129722  | 1.876719  |
| 58 | 1 | 0 | -0.609324 | -2.713151 | -1.213027 |
| 59 | 1 | 0 | -2.901714 | -3.453137 | -0.712807 |
| 60 | 1 | 0 | -4.457383 | 0.129375  | -2.495837 |
| 61 | 1 | 0 | -2.166663 | 0.892029  | -2.961975 |
| 62 | 1 | 0 | -5.727328 | -1.494221 | -1.438514 |
| 63 | 1 | 0 | 0.531737  | 2.527743  | -0.685673 |
| 64 | 1 | 0 | -2.795628 | -0.760454 | 3.525290  |

(2,2)-a

| Center Number | Atomic Number | Atomic Type | Coordinates (Angstroms) |           |           |
|---------------|---------------|-------------|-------------------------|-----------|-----------|
|               |               |             | X                       | Y         | Z         |
| 1             | 8             | 0           | 2.561128                | 0.768159  | -0.132651 |
| 2             | 6             | 0           | 2.538724                | 2.080760  | 0.459540  |
| 3             | 6             | 0           | 3.670606                | 2.937127  | -0.101375 |
| 4             | 6             | 0           | 5.001888                | 2.243915  | 0.032303  |
| 5             | 6             | 0           | 6.172211                | 0.036735  | 0.011945  |
| 6             | 6             | 0           | 6.137335                | -1.345017 | -0.098429 |
| 7             | 6             | 0           | 4.900742                | -1.987000 | -0.208437 |
| 8             | 6             | 0           | 3.695559                | -1.269199 | -0.213245 |
| 9             | 6             | 0           | 3.742085                | 0.110044  | -0.101092 |
| 10            | 6             | 0           | 4.971990                | 0.801012  | 0.015221  |
| 11            | 8             | 0           | 6.056661                | 2.894361  | 0.108594  |
| 12            | 8             | 0           | 7.360552                | 0.647053  | 0.109222  |
| 13            | 8             | 0           | 4.920991                | -3.327675 | -0.305086 |
| 14            | 6             | 0           | 1.179795                | 2.678707  | 0.206725  |
| 15            | 6             | 0           | 0.407370                | 3.155980  | 1.265182  |
| 16            | 6             | 0           | -0.821295               | 3.769428  | 1.036048  |
| 17            | 6             | 0           | -1.283538               | 3.897339  | -0.269752 |
| 18            | 6             | 0           | -0.537782               | 3.407287  | -1.341181 |
| 19            | 6             | 0           | 0.691242                | 2.807155  | -1.095989 |
| 20            | 8             | 0           | -2.506133               | 4.495171  | -0.450337 |

|    |   |   |           |           |           |
|----|---|---|-----------|-----------|-----------|
| 21 | 1 | 0 | 2.686646  | 1.952290  | 1.539910  |
| 22 | 1 | 0 | 3.505032  | 3.132390  | -1.168587 |
| 23 | 1 | 0 | 3.706392  | 3.901685  | 0.409922  |
| 24 | 1 | 0 | 7.055264  | -1.920158 | -0.093282 |
| 25 | 1 | 0 | 2.736084  | -1.765983 | -0.299402 |
| 26 | 1 | 0 | 7.188627  | 1.618095  | 0.146195  |
| 27 | 1 | 0 | 4.025382  | -3.703039 | -0.210450 |
| 28 | 1 | 0 | 0.765958  | 3.055900  | 2.285555  |
| 29 | 1 | 0 | -1.420827 | 4.146348  | 1.857709  |
| 30 | 1 | 0 | -0.912246 | 3.493149  | -2.357168 |
| 31 | 1 | 0 | 1.268628  | 2.426418  | -1.933019 |
| 32 | 1 | 0 | -2.675058 | 4.640698  | -1.388748 |
| 33 | 8 | 0 | -2.561135 | -0.768162 | 0.132727  |
| 34 | 6 | 0 | -2.538726 | -2.080749 | -0.459492 |
| 35 | 6 | 0 | -3.670604 | -2.937137 | 0.101402  |
| 36 | 6 | 0 | -5.001892 | -2.243921 | -0.032196 |
| 37 | 6 | 0 | -6.172210 | -0.036732 | -0.011993 |
| 38 | 6 | 0 | -6.137334 | 1.345022  | 0.098368  |
| 39 | 6 | 0 | -4.900745 | 1.987002  | 0.208424  |
| 40 | 6 | 0 | -3.695564 | 1.269198  | 0.213285  |
| 41 | 6 | 0 | -3.742091 | -0.110046 | 0.101146  |
| 42 | 6 | 0 | -4.971993 | -0.801015 | -0.015192 |
| 43 | 8 | 0 | -6.056650 | -2.894374 | -0.108645 |
| 44 | 8 | 0 | -7.360550 | -0.647040 | -0.109357 |
| 45 | 8 | 0 | -4.920996 | 3.327679  | 0.305053  |
| 46 | 6 | 0 | -1.179794 | -2.678698 | -0.206696 |
| 47 | 6 | 0 | -0.407370 | -3.155942 | -1.265167 |
| 48 | 6 | 0 | 0.821295  | -3.769396 | -1.036051 |
| 49 | 6 | 0 | 1.283541  | -3.897343 | 0.269745  |
| 50 | 6 | 0 | 0.537786  | -3.407321 | 1.341188  |
| 51 | 6 | 0 | -0.691240 | -2.807182 | 1.096014  |
| 52 | 8 | 0 | 2.506136  | -4.495179 | 0.450311  |
| 53 | 1 | 0 | -2.686650 | -1.952251 | -1.539858 |
| 54 | 1 | 0 | -3.505013 | -3.132448 | 1.168602  |
| 55 | 1 | 0 | -3.706397 | -3.901673 | -0.409938 |
| 56 | 1 | 0 | -7.055261 | 1.920166  | 0.093167  |
| 57 | 1 | 0 | -2.736091 | 1.765980  | 0.299468  |
| 58 | 1 | 0 | -7.188624 | -1.618080 | -0.146371 |
| 59 | 1 | 0 | -4.025386 | 3.703046  | 0.210435  |
| 60 | 1 | 0 | -0.765959 | -3.055835 | -2.285536 |
| 61 | 1 | 0 | 1.420827  | -4.146293 | -1.857723 |
| 62 | 1 | 0 | 0.912249  | -3.493212 | 2.357173  |
| 63 | 1 | 0 | -1.268625 | -2.426469 | 1.933055  |
| 64 | 1 | 0 | 2.675063  | -4.640733 | 1.388718  |

(2,2)-b

| Center Number | Atomic Number | Atomic Type | Coordinates (Angstroms) |           |           |
|---------------|---------------|-------------|-------------------------|-----------|-----------|
|               |               |             | X                       | Y         | Z         |
| 1             | 8             | 0           | 0.727121                | -2.773813 | -0.160837 |
| 2             | 6             | 0           | -0.091799               | -1.584731 | -0.240820 |
| 3             | 6             | 0           | 0.330059                | -0.741396 | -1.435984 |
| 4             | 6             | 0           | 1.805633                | -0.434621 | -1.388748 |
| 5             | 6             | 0           | 4.049672                | -1.254764 | -0.653538 |
| 6             | 6             | 0           | 4.846551                | -2.233221 | -0.073757 |
| 7             | 6             | 0           | 4.238631                | -3.371092 | 0.455941  |
| 8             | 6             | 0           | 2.849690                | -3.549854 | 0.433968  |
| 9             | 6             | 0           | 2.063419                | -2.563708 | -0.139730 |
| 10            | 6             | 0           | 2.636461                | -1.398621 | -0.700782 |
| 11            | 8             | 0           | 2.267153                | 0.568856  | -1.950918 |
| 12            | 8             | 0           | 4.639360                | -0.176299 | -1.181316 |
| 13            | 8             | 0           | 5.057564                | -4.293745 | 1.006711  |
| 14            | 6             | 0           | -1.536975               | -2.003151 | -0.246538 |
| 15            | 6             | 0           | -2.301649               | -1.847588 | 0.911724  |
| 16            | 6             | 0           | -3.652225               | -2.170250 | 0.930503  |
| 17            | 6             | 0           | -4.256282               | -2.637435 | -0.233561 |
| 18            | 6             | 0           | -3.503030               | -2.848903 | -1.386955 |
| 19            | 6             | 0           | -2.148895               | -2.530853 | -1.385089 |
| 20            | 8             | 0           | -5.616370               | -2.806444 | -0.208640 |
| 21            | 1             | 0           | 0.095763                | -1.009073 | 0.671886  |
| 22            | 1             | 0           | 0.135608                | -1.266367 | -2.379045 |
| 23            | 1             | 0           | -0.233252               | 0.193242  | -1.450681 |
| 24            | 1             | 0           | 5.922698                | -2.115786 | -0.039233 |



|    |   |   |           |           |           |
|----|---|---|-----------|-----------|-----------|
| 25 | 1 | 0 | 2.382242  | -4.429270 | 0.862714  |
| 26 | 1 | 0 | 3.928685  | 0.390671  | -1.564024 |
| 27 | 1 | 0 | 4.552817  | -5.047140 | 1.333257  |
| 28 | 1 | 0 | -1.841932 | -1.442021 | 1.808366  |
| 29 | 1 | 0 | -4.252991 | -2.014850 | 1.820127  |
| 30 | 1 | 0 | -3.973494 | -3.228824 | -2.289337 |
| 31 | 1 | 0 | -1.577114 | -2.689165 | -2.294336 |
| 32 | 1 | 0 | -5.919602 | -3.230532 | -1.019528 |
| 33 | 8 | 0 | -0.539234 | 1.575282  | 0.832555  |
| 34 | 6 | 0 | -1.451832 | 2.607442  | 0.381275  |
| 35 | 6 | 0 | -0.968006 | 3.206103  | -0.932352 |
| 36 | 6 | 0 | 0.465284  | 3.664132  | -0.833918 |
| 37 | 6 | 0 | 2.711300  | 3.161378  | 0.134527  |
| 38 | 6 | 0 | 3.536069  | 2.365286  | 0.917223  |
| 39 | 6 | 0 | 2.966424  | 1.333554  | 1.661168  |
| 40 | 6 | 0 | 1.587401  | 1.089841  | 1.655114  |
| 41 | 6 | 0 | 0.775263  | 1.884998  | 0.862679  |
| 42 | 6 | 0 | 1.307875  | 2.938857  | 0.087417  |
| 43 | 8 | 0 | 0.891435  | 4.580184  | -1.553945 |
| 44 | 8 | 0 | 3.265446  | 4.133223  | -0.599040 |
| 45 | 8 | 0 | 3.808199  | 0.580500  | 2.399390  |
| 46 | 6 | 0 | -2.819442 | 1.977626  | 0.343876  |
| 47 | 6 | 0 | -3.658023 | 2.098444  | 1.454418  |
| 48 | 6 | 0 | -4.878035 | 1.433306  | 1.512755  |
| 49 | 6 | 0 | -5.274334 | 0.627960  | 0.446203  |
| 50 | 6 | 0 | -4.477570 | 0.548168  | -0.697915 |
| 51 | 6 | 0 | -3.253811 | 1.203344  | -0.735254 |
| 52 | 8 | 0 | -6.440940 | -0.066589 | 0.566616  |
| 53 | 1 | 0 | -1.438214 | 3.390809  | 1.150405  |
| 54 | 1 | 0 | -1.005865 | 2.471061  | -1.745591 |
| 55 | 1 | 0 | -1.601937 | 4.047006  | -1.221679 |
| 56 | 1 | 0 | 4.606600  | 2.527610  | 0.930207  |
| 57 | 1 | 0 | 1.150875  | 0.304156  | 2.261799  |
| 58 | 1 | 0 | 2.542078  | 4.552951  | -1.123109 |
| 59 | 1 | 0 | 3.329404  | -0.124167 | 2.850194  |
| 60 | 1 | 0 | -3.343276 | 2.702146  | 2.301451  |
| 61 | 1 | 0 | -5.510835 | 1.502577  | 2.391165  |
| 62 | 1 | 0 | -4.795571 | -0.059505 | -1.539260 |
| 63 | 1 | 0 | -2.636018 | 1.085343  | -1.619949 |
| 64 | 1 | 0 | -6.381482 | -0.901623 | 0.076486  |

(2,2)-b'

| Center<br>Number | Atomic<br>Number | Atomic<br>Type | Coordinates (Angstroms) |           |           |
|------------------|------------------|----------------|-------------------------|-----------|-----------|
|                  |                  |                | X                       | Y         | Z         |
| 1                | 8                | 0              | 0.903506                | -1.223887 | 1.011126  |
| 2                | 6                | 0              | 0.174524                | -1.735826 | -0.112792 |
| 3                | 6                | 0              | 0.791683                | -3.052808 | -0.573506 |
| 4                | 6                | 0              | 2.257204                | -2.868262 | -0.878924 |
| 5                | 6                | 0              | 4.346459                | -1.662613 | -0.217637 |
| 6                | 6                | 0              | 5.008293                | -0.762256 | 0.603354  |
| 7                | 6                | 0              | 4.272267                | -0.043593 | 1.546922  |
| 8                | 6                | 0              | 2.889080                | -0.201124 | 1.686440  |
| 9                | 6                | 0              | 2.240646                | -1.096705 | 0.855303  |
| 10               | 6                | 0              | 2.943345                | -1.859969 | -0.104321 |
| 11               | 8                | 0              | 2.833258                | -3.571857 | -1.723562 |
| 12               | 8                | 0              | 5.054460                | -2.354710 | -1.120531 |
| 13               | 8                | 0              | 4.961569                | 0.823391  | 2.316827  |
| 14               | 6                | 0              | -1.278480               | -1.853165 | 0.274708  |
| 15               | 6                | 0              | -2.231829               | -2.029598 | -0.733150 |
| 16               | 6                | 0              | -3.579894               | -2.146196 | -0.431099 |
| 17               | 6                | 0              | -3.998885               | -2.071563 | 0.898676  |
| 18               | 6                | 0              | -3.061743               | -1.891879 | 1.913687  |
| 19               | 6                | 0              | -1.707712               | -1.789274 | 1.597763  |
| 20               | 8                | 0              | -5.334852               | -2.177114 | 1.138230  |
| 21               | 1                | 0              | 0.265252                | -0.995733 | -0.920303 |
| 22               | 1                | 0              | 0.696477                | -3.804563 | 0.220530  |
| 23               | 1                | 0              | 0.280446                | -3.433647 | -1.460082 |
| 24               | 1                | 0              | 6.076903                | -0.612687 | 0.509976  |
| 25               | 1                | 0              | 2.319909                | 0.384962  | 2.399175  |
| 26               | 1                | 0              | 4.427908                | -2.964273 | -1.577942 |
| 27               | 1                | 0              | 4.366784                | 1.301089  | 2.905943  |
| 28               | 1                | 0              | -1.921187               | -2.057738 | -1.774383 |

|    |   |   |           |           |           |
|----|---|---|-----------|-----------|-----------|
| 29 | 1 | 0 | -4.319526 | -2.264488 | -1.215431 |
| 30 | 1 | 0 | -3.382510 | -1.823107 | 2.949364  |
| 31 | 1 | 0 | -0.986598 | -1.641537 | 2.394015  |
| 32 | 1 | 0 | -5.521483 | -2.008098 | 2.067777  |
| 33 | 8 | 0 | -0.945331 | 1.541113  | -1.169832 |
| 34 | 6 | 0 | -0.272915 | 2.302344  | -0.157887 |
| 35 | 6 | 0 | -0.593533 | 1.740984  | 1.225782  |
| 36 | 6 | 0 | -2.077998 | 1.629536  | 1.443310  |
| 37 | 6 | 0 | -4.288132 | 1.234775  | 0.346255  |
| 38 | 6 | 0 | -5.043377 | 0.982527  | -0.790381 |
| 39 | 6 | 0 | -4.398028 | 0.916004  | -2.024067 |
| 40 | 6 | 0 | -3.018846 | 1.117660  | -2.154764 |
| 41 | 6 | 0 | -2.278846 | 1.379046  | -1.014274 |
| 42 | 6 | 0 | -2.885618 | 1.445918  | 0.259785  |
| 43 | 8 | 0 | -2.561725 | 1.660831  | 2.586546  |
| 44 | 8 | 0 | -4.900228 | 1.262356  | 1.536220  |
| 45 | 8 | 0 | -5.173349 | 0.647618  | -3.098032 |
| 46 | 6 | 0 | 1.207980  | 2.286678  | -0.455183 |
| 47 | 6 | 0 | 2.054251  | 3.131794  | 0.269564  |
| 48 | 6 | 0 | 3.427777  | 3.115817  | 0.069112  |
| 49 | 6 | 0 | 3.978881  | 2.247008  | -0.874738 |
| 50 | 6 | 0 | 3.147394  | 1.412225  | -1.617289 |
| 51 | 6 | 0 | 1.770985  | 1.436794  | -1.404105 |
| 52 | 8 | 0 | 5.331463  | 2.267568  | -1.030168 |
| 53 | 1 | 0 | -0.650743 | 3.332746  | -0.224489 |
| 54 | 1 | 0 | -0.162804 | 0.736903  | 1.325695  |
| 55 | 1 | 0 | -0.160759 | 2.369081  | 2.007725  |
| 56 | 1 | 0 | -6.109760 | 0.809540  | -0.715156 |
| 57 | 1 | 0 | -2.526278 | 1.076545  | -3.120098 |
| 58 | 1 | 0 | -4.201576 | 1.414104  | 2.217537  |
| 59 | 1 | 0 | -4.641917 | 0.615093  | -3.901335 |
| 60 | 1 | 0 | 1.638508  | 3.816266  | 1.004684  |
| 61 | 1 | 0 | 4.082501  | 3.767067  | 0.638294  |
| 62 | 1 | 0 | 3.568801  | 0.735628  | -2.355825 |
| 63 | 1 | 0 | 1.134404  | 0.788164  | -1.994783 |
| 64 | 1 | 0 | 5.607494  | 1.570548  | -1.634779 |

(2,2)-g

| Center<br>Number | Atomic<br>Number | Atomic<br>Type | Coordinates (Angstroms) |           |           |
|------------------|------------------|----------------|-------------------------|-----------|-----------|
|                  |                  |                | X                       | Y         | Z         |
| 1                | 8                | 0              | -2.425834               | 0.509871  | 1.042501  |
| 2                | 6                | 0              | -3.365572               | 1.468768  | 0.509581  |
| 3                | 6                | 0              | -2.825145               | 2.092222  | -0.772950 |
| 4                | 6                | 0              | -1.442322               | 2.651945  | -0.573307 |
| 5                | 6                | 0              | 0.732806                | 2.354719  | 0.617903  |
| 6                | 6                | 0              | 1.537747                | 1.652268  | 1.503049  |
| 7                | 6                | 0              | 0.992908                | 0.567795  | 2.192385  |
| 8                | 6                | 0              | -0.345641               | 0.191862  | 2.045887  |
| 9                | 6                | 0              | -1.144982               | 0.908698  | 1.168780  |
| 10               | 6                | 0              | -0.627809               | 1.994645  | 0.423977  |
| 11               | 8                | 0              | -1.024056               | 3.595041  | -1.262349 |
| 12               | 8                | 0              | 1.272921                | 3.361962  | -0.079636 |
| 13               | 8                | 0              | 1.827438                | -0.095836 | 3.021512  |
| 14               | 6                | 0              | -4.673832               | 0.750671  | 0.316983  |
| 15               | 6                | 0              | -5.810436               | 1.135777  | 1.028476  |
| 16               | 6                | 0              | -7.025731               | 0.482560  | 0.847935  |
| 17               | 6                | 0              | -7.108252               | -0.580734 | -0.050161 |
| 18               | 6                | 0              | -5.977078               | -0.982923 | -0.765953 |
| 19               | 6                | 0              | -4.772579               | -0.314623 | -0.582402 |
| 20               | 8                | 0              | -8.316656               | -1.191778 | -0.190373 |
| 21               | 1                | 0              | -3.486117               | 2.253496  | 1.268147  |
| 22               | 1                | 0              | -2.759420               | 1.332675  | -1.561319 |
| 23               | 1                | 0              | -3.494276               | 2.881739  | -1.121763 |
| 24               | 1                | 0              | 2.576091                | 1.929434  | 1.639841  |
| 25               | 1                | 0              | -0.766333               | -0.642343 | 2.595959  |
| 26               | 1                | 0              | 0.571656                | 3.706697  | -0.684099 |
| 27               | 1                | 0              | 1.383676                | -0.858701 | 3.408988  |
| 28               | 1                | 0              | -5.751908               | 1.958356  | 1.736067  |
| 29               | 1                | 0              | -7.909818               | 0.784477  | 1.399188  |
| 30               | 1                | 0              | -6.039228               | -1.812062 | -1.465472 |
| 31               | 1                | 0              | -3.898211               | -0.631296 | -1.144284 |
| 32               | 1                | 0              | -8.258134               | -1.906788 | -0.833074 |
| 33               | 8                | 0              | 2.591810                | -1.631617 | -0.037076 |

|    |   |   |           |           |           |
|----|---|---|-----------|-----------|-----------|
| 34 | 6 | 0 | 3.297079  | -1.007385 | -1.122948 |
| 35 | 6 | 0 | 2.533533  | 0.206181  | -1.649357 |
| 36 | 6 | 0 | 1.090621  | -0.113785 | -1.935140 |
| 37 | 6 | 0 | -0.880277 | -1.486807 | -1.250133 |
| 38 | 6 | 0 | -1.459989 | -2.435701 | -0.423226 |
| 39 | 6 | 0 | -0.658954 | -3.087649 | 0.515098  |
| 40 | 6 | 0 | 0.709791  | -2.825432 | 0.633789  |
| 41 | 6 | 0 | 1.277394  | -1.875012 | -0.200937 |
| 42 | 6 | 0 | 0.503928  | -1.178220 | -1.155756 |
| 43 | 8 | 0 | 0.440768  | 0.542276  | -2.765647 |
| 44 | 8 | 0 | -1.650763 | -0.844363 | -2.139903 |
| 45 | 8 | 0 | -1.273462 | -3.996677 | 1.302871  |
| 46 | 6 | 0 | 4.664655  | -0.634145 | -0.611191 |
| 47 | 6 | 0 | 5.774081  | -0.681319 | -1.456103 |
| 48 | 6 | 0 | 7.026880  | -0.271806 | -1.012178 |
| 49 | 6 | 0 | 7.179804  | 0.184102  | 0.297547  |
| 50 | 6 | 0 | 6.079689  | 0.227942  | 1.156523  |
| 51 | 6 | 0 | 4.830623  | -0.176567 | 0.696923  |
| 52 | 8 | 0 | 8.428125  | 0.567351  | 0.686167  |
| 53 | 1 | 0 | 3.386451  | -1.753103 | -1.924330 |
| 54 | 1 | 0 | 2.551784  | 1.010407  | -0.904457 |
| 55 | 1 | 0 | 3.010928  | 0.585622  | -2.555634 |
| 56 | 1 | 0 | -2.518129 | -2.655946 | -0.489733 |
| 57 | 1 | 0 | 1.331024  | -3.348533 | 1.352594  |
| 58 | 1 | 0 | -1.068852 | -0.197765 | -2.611211 |
| 59 | 1 | 0 | -0.644592 | -4.404328 | 1.908893  |
| 60 | 1 | 0 | 5.664469  | -1.041321 | -2.475746 |
| 61 | 1 | 0 | 7.890695  | -0.308577 | -1.667287 |
| 62 | 1 | 0 | 6.197366  | 0.575834  | 2.179157  |
| 63 | 1 | 0 | 3.973690  | -0.157383 | 1.363212  |
| 64 | 1 | 0 | 8.417220  | 0.861283  | 1.603258  |

**(2,2)-g'**

| Center<br>Number | Atomic<br>Number | Atomic<br>Type | Coordinates (Angstroms) |           |           |
|------------------|------------------|----------------|-------------------------|-----------|-----------|
|                  |                  |                | X                       | Y         | Z         |
| 1                | 8                | 0              | 3.582171                | 0.063583  | -0.144704 |
| 2                | 6                | 0              | 3.580133                | -1.163125 | -0.928567 |
| 3                | 6                | 0              | 4.807033                | -1.992061 | -0.574818 |
| 4                | 6                | 0              | 6.070388                | -1.185696 | -0.746000 |
| 5                | 6                | 0              | 7.091470                | 1.094026  | -0.587268 |
| 6                | 6                | 0              | 6.979788                | 2.448464  | -0.301091 |
| 7                | 6                | 0              | 5.730304                | 2.968151  | 0.035110  |
| 8                | 6                | 0              | 4.580766                | 2.166773  | 0.076125  |
| 9                | 6                | 0              | 4.708490                | 0.821205  | -0.214347 |
| 10               | 6                | 0              | 5.953096                | 0.243255  | -0.546043 |
| 11               | 8                | 0              | 7.149638                | -1.734994 | -1.010036 |
| 12               | 8                | 0              | 8.296257                | 0.597872  | -0.889566 |
| 13               | 8                | 0              | 5.676260                | 4.287963  | 0.307180  |
| 14               | 6                | 0              | 2.258956                | -1.842524 | -0.698769 |
| 15               | 6                | 0              | 1.295760                | -1.850365 | -1.710828 |
| 16               | 6                | 0              | 0.047259                | -2.424946 | -1.510741 |
| 17               | 6                | 0              | -0.256076               | -2.996738 | -0.275064 |
| 18               | 6                | 0              | 0.695553                | -3.001824 | 0.746933  |
| 19               | 6                | 0              | 1.943355                | -2.431310 | 0.527749  |
| 20               | 8                | 0              | -1.494285               | -3.536515 | -0.124620 |
| 21               | 1                | 0              | 3.647479                | -0.852898 | -1.978676 |
| 22               | 1                | 0              | 4.856479                | -2.883412 | -1.203927 |
| 23               | 1                | 0              | 7.852598                | 3.089097  | -0.329617 |
| 24               | 1                | 0              | 3.607163                | 2.582059  | 0.312581  |
| 25               | 1                | 0              | 8.189684                | -0.373724 | -1.022497 |
| 26               | 1                | 0              | 4.780603                | 4.553062  | 0.545487  |
| 27               | 1                | 0              | 1.519591                | -1.393027 | -2.670625 |
| 28               | 1                | 0              | -0.700332               | -2.427228 | -2.296656 |
| 29               | 1                | 0              | 0.460140                | -3.441211 | 1.712140  |
| 30               | 1                | 0              | 2.662813                | -2.429155 | 1.341031  |
| 31               | 1                | 0              | -1.604451               | -3.884665 | 0.766723  |
| 32               | 8                | 0              | -3.889296               | 1.246324  | 0.282872  |
| 33               | 6                | 0              | -3.511366               | 0.196675  | 1.194896  |
| 34               | 6                | 0              | -3.885176               | -1.165739 | 0.618214  |
| 35               | 6                | 0              | -5.338060               | -1.214450 | 0.224745  |
| 36               | 6                | 0              | -7.256118               | 0.103983  | -0.688988 |
| 37               | 6                | 0              | -7.778456               | 1.294298  | -1.174716 |

|    |   |   |           |           |           |
|----|---|---|-----------|-----------|-----------|
| 38 | 6 | 0 | -6.974582 | 2.435270  | -1.165595 |
| 39 | 6 | 0 | -5.666288 | 2.418820  | -0.668674 |
| 40 | 6 | 0 | -5.157437 | 1.226353  | -0.178600 |
| 41 | 6 | 0 | -5.928754 | 0.040481  | -0.181794 |
| 42 | 8 | 0 | -5.966933 | -2.284480 | 0.217063  |
| 43 | 8 | 0 | -8.020381 | -0.994873 | -0.717957 |
| 44 | 8 | 0 | -7.527626 | 3.567422  | -1.651013 |
| 45 | 6 | 0 | -2.036121 | 0.325226  | 1.462844  |
| 46 | 6 | 0 | -1.538613 | 0.191472  | 2.759578  |
| 47 | 6 | 0 | -0.169556 | 0.224968  | 3.008175  |
| 48 | 6 | 0 | 0.720461  | 0.410728  | 1.950392  |
| 49 | 6 | 0 | 0.232343  | 0.582415  | 0.652177  |
| 50 | 6 | 0 | -1.134084 | 0.521084  | 0.414755  |
| 51 | 8 | 0 | 2.050256  | 0.417270  | 2.229093  |
| 52 | 1 | 0 | -3.678017 | -1.953210 | 1.345961  |
| 53 | 1 | 0 | -8.789113 | 1.334878  | -1.561964 |
| 54 | 1 | 0 | -5.056083 | 3.314712  | -0.643804 |
| 55 | 1 | 0 | -7.473737 | -1.740657 | -0.372820 |
| 56 | 1 | 0 | -6.899948 | 4.297888  | -1.611041 |
| 57 | 1 | 0 | -2.224989 | 0.048592  | 3.590245  |
| 58 | 1 | 0 | 0.217736  | 0.102267  | 4.014237  |
| 59 | 1 | 0 | 0.924598  | 0.730570  | -0.170123 |
| 60 | 1 | 0 | -1.501761 | 0.631852  | -0.600945 |
| 61 | 1 | 0 | 2.560746  | 0.331012  | 1.406022  |
| 62 | 1 | 0 | -3.280794 | -1.379178 | -0.272881 |
| 63 | 1 | 0 | -4.071399 | 0.359123  | 2.125664  |
| 64 | 1 | 0 | 4.765713  | -2.322528 | 0.470247  |

(2,2)-g''

| Center<br>Number | Atomic<br>Number | Atomic<br>Type | Coordinates (Angstroms) |           |           |
|------------------|------------------|----------------|-------------------------|-----------|-----------|
|                  |                  |                | X                       | Y         | Z         |
| 1                | 8                | 0              | -2.816419               | 1.458538  | 0.033036  |
| 2                | 6                | 0              | -3.471296               | 0.203041  | 0.312466  |
| 3                | 6                | 0              | -3.296263               | -0.167916 | 1.781076  |
| 4                | 6                | 0              | -1.843804               | -0.145442 | 2.184468  |
| 5                | 6                | 0              | 0.379679                | 0.920957  | 1.783847  |
| 6                | 6                | 0              | 1.169375                | 1.856050  | 1.132150  |
| 7                | 6                | 0              | 0.597548                | 2.628507  | 0.121475  |
| 8                | 6                | 0              | -0.741512               | 2.486736  | -0.256173 |
| 9                | 6                | 0              | -1.521265               | 1.550382  | 0.404330  |
| 10               | 6                | 0              | -0.988547               | 0.749717  | 1.440153  |
| 11               | 8                | 0              | -1.432845               | -0.829944 | 3.134830  |
| 12               | 8                | 0              | 0.929458                | 0.178020  | 2.754888  |
| 13               | 8                | 0              | 1.407975                | 3.521630  | -0.492019 |
| 14               | 6                | 0              | -4.909337               | 0.324907  | -0.110564 |
| 15               | 6                | 0              | -5.454776               | -0.598207 | -1.004730 |
| 16               | 6                | 0              | -6.789890               | -0.520479 | -1.387402 |
| 17               | 6                | 0              | -7.594248               | 0.499533  | -0.880194 |
| 18               | 6                | 0              | -7.061262               | 1.434804  | 0.010977  |
| 19               | 6                | 0              | -5.727384               | 1.339127  | 0.392051  |
| 20               | 8                | 0              | -8.892211               | 0.536850  | -1.289917 |
| 21               | 1                | 0              | -2.979465               | -0.555006 | -0.305459 |
| 22               | 1                | 0              | -3.832203               | 0.543827  | 2.422328  |
| 23               | 1                | 0              | -3.710656               | -1.160796 | 1.971776  |
| 24               | 1                | 0              | 2.214747                | 1.972363  | 1.391230  |
| 25               | 1                | 0              | -1.174705               | 3.079097  | -1.054570 |
| 26               | 1                | 0              | 0.211699                | -0.388627 | 3.127620  |
| 27               | 1                | 0              | 0.922444                | 4.016023  | -1.162027 |
| 28               | 1                | 0              | -4.826678               | -1.390560 | -1.403699 |
| 29               | 1                | 0              | -7.214480               | -1.237738 | -2.081753 |
| 30               | 1                | 0              | -7.685242               | 2.232364  | 0.404836  |
| 31               | 1                | 0              | -5.321519               | 2.073939  | 1.081446  |
| 32               | 1                | 0              | -9.350356               | 1.282006  | -0.887005 |
| 33               | 8                | 0              | 2.681662                | -0.184890 | -0.819358 |
| 34               | 6                | 0              | 2.357894                | -1.336320 | -0.029865 |
| 35               | 6                | 0              | 3.353259                | -2.457539 | -0.322125 |
| 36               | 6                | 0              | 4.768534                | -1.985054 | -0.105450 |
| 37               | 6                | 0              | 6.308735                | -0.016776 | -0.205421 |
| 38               | 6                | 0              | 6.534047                | 1.325670  | -0.477301 |
| 39               | 6                | 0              | 5.455322                | 2.124958  | -0.858258 |
| 40               | 6                | 0              | 4.155083                | 1.618575  | -0.970344 |
| 41               | 6                | 0              | 3.943106                | 0.279210  | -0.691949 |

|    |   |   |           |           |           |
|----|---|---|-----------|-----------|-----------|
| 42 | 6 | 0 | 5.004343  | -0.573104 | -0.306084 |
| 43 | 8 | 0 | 5.672738  | -2.778885 | 0.198293  |
| 44 | 8 | 0 | 7.346126  | -0.787358 | 0.145554  |
| 45 | 8 | 0 | 5.722129  | 3.426201  | -1.102571 |
| 46 | 6 | 0 | 0.934913  | -1.737251 | -0.322009 |
| 47 | 6 | 0 | 0.255905  | -2.532892 | 0.600655  |
| 48 | 6 | 0 | -1.034586 | -2.984519 | 0.346276  |
| 49 | 6 | 0 | -1.661710 | -2.633795 | -0.848967 |
| 50 | 6 | 0 | -1.003491 | -1.821236 | -1.771865 |
| 51 | 6 | 0 | 0.289192  | -1.381016 | -1.506774 |
| 52 | 8 | 0 | -2.931197 | -3.031536 | -1.154841 |
| 53 | 1 | 0 | 2.439743  | -1.044126 | 1.026594  |
| 54 | 1 | 0 | 3.255295  | -2.775783 | -1.368218 |
| 55 | 1 | 0 | 3.158546  | -3.325568 | 0.311556  |
| 56 | 1 | 0 | 7.529735  | 1.744290  | -0.396548 |
| 57 | 1 | 0 | 3.314924  | 2.256056  | -1.223761 |
| 58 | 1 | 0 | 7.002094  | -1.704718 | 0.263560  |
| 59 | 1 | 0 | 4.917332  | 3.894517  | -1.352169 |
| 60 | 1 | 0 | 0.731751  | -2.801191 | 1.540095  |
| 61 | 1 | 0 | -1.552623 | -3.595460 | 1.079906  |
| 62 | 1 | 0 | -1.510182 | -1.540080 | -2.689207 |
| 63 | 1 | 0 | 0.796407  | -0.748051 | -2.226549 |
| 64 | 1 | 0 | -3.281338 | -3.599567 | -0.459842 |

(1,2)-a

| Center<br>Number | Atomic<br>Number | Atomic<br>Type | Coordinates (Angstroms) |           |           |
|------------------|------------------|----------------|-------------------------|-----------|-----------|
|                  |                  |                | X                       | Y         | Z         |
| 1                | 6                | 0              | -0.204392               | -2.468348 | 1.344583  |
| 2                | 6                | 0              | -0.607054               | -2.664974 | 0.022769  |
| 3                | 6                | 0              | 0.205022                | -3.423220 | -0.823550 |
| 4                | 6                | 0              | 1.388812                | -3.989264 | -0.360796 |
| 5                | 6                | 0              | 1.777339                | -3.777054 | 0.959886  |
| 6                | 6                | 0              | 0.988404                | -3.010769 | 1.814660  |
| 7                | 6                | 0              | -1.942103               | -2.168644 | -0.474104 |
| 8                | 8                | 0              | -2.255923               | -0.948280 | 0.211594  |
| 9                | 6                | 0              | -3.491726               | -0.433369 | 0.014452  |
| 10               | 6                | 0              | -4.563166               | -1.232424 | -0.450429 |
| 11               | 6                | 0              | -4.392617               | -2.654839 | -0.625021 |
| 12               | 6                | 0              | -3.041068               | -3.205972 | -0.252655 |
| 13               | 6                | 0              | -5.833297               | -0.614532 | -0.623096 |
| 14               | 6                | 0              | -6.018895               | 0.727657  | -0.330167 |
| 15               | 6                | 0              | -4.937944               | 1.475483  | 0.145007  |
| 16               | 6                | 0              | -3.665776               | 0.908457  | 0.309299  |
| 17               | 8                | 0              | -5.305871               | -3.401154 | -1.011641 |
| 18               | 8                | 0              | -6.878325               | -1.331470 | -1.056218 |
| 19               | 8                | 0              | -5.180413               | 2.767067  | 0.425980  |
| 20               | 8                | 0              | 2.983598                | -4.302357 | 1.351809  |
| 21               | 8                | 0              | -3.128454               | 4.540702  | 1.202642  |
| 22               | 6                | 0              | -1.845361               | 4.153087  | 0.917368  |
| 23               | 6                | 0              | -1.261086               | 3.214202  | 1.763290  |
| 24               | 6                | 0              | 0.009043                | 2.735512  | 1.469334  |
| 25               | 6                | 0              | 0.720343                | 3.190927  | 0.350117  |
| 26               | 6                | 0              | 0.115662                | 4.153854  | -0.471811 |
| 27               | 6                | 0              | -1.157281               | 4.632683  | -0.197960 |
| 28               | 6                | 0              | 2.034307                | 2.610137  | 0.066324  |
| 29               | 8                | 0              | 2.358550                | 0.169640  | -1.411563 |
| 30               | 6                | 0              | 3.544683                | -0.082725 | -0.809324 |
| 31               | 6                | 0              | 4.492336                | 0.965561  | -0.706288 |
| 32               | 6                | 0              | 4.230785                | 2.374877  | -1.040149 |
| 33               | 6                | 0              | 2.902556                | 2.990830  | -0.883259 |
| 34               | 6                | 0              | 5.790636                | 0.608688  | -0.235773 |
| 35               | 6                | 0              | 6.072179                | -0.665300 | 0.248407  |
| 36               | 6                | 0              | 5.080318                | -1.639642 | 0.204110  |
| 37               | 6                | 0              | 3.829200                | -1.361548 | -0.356598 |
| 38               | 8                | 0              | 5.171134                | 3.115971  | -1.390220 |
| 39               | 8                | 0              | 6.787499                | 1.506488  | -0.209870 |
| 40               | 8                | 0              | 5.377130                | -2.864587 | 0.682225  |
| 41               | 1                | 0              | 2.309531                | 1.773978  | 0.706424  |
| 42               | 1                | 0              | 2.734186                | 3.861529  | -1.510526 |
| 43               | 1                | 0              | 7.057218                | -0.891683 | 0.637956  |
| 44               | 1                | 0              | 3.090770                | -2.146462 | -0.470378 |
| 45               | 1                | 0              | 6.471640                | 2.302407  | -0.697222 |

|    |   |   |           |           |           |
|----|---|---|-----------|-----------|-----------|
| 46 | 1 | 0 | 4.577487  | -3.418367 | 0.731493  |
| 47 | 1 | 0 | 0.455809  | 1.989159  | 2.119855  |
| 48 | 1 | 0 | -1.807402 | 2.859737  | 2.631001  |
| 49 | 1 | 0 | -1.620832 | 5.361157  | -0.856557 |
| 50 | 1 | 0 | 0.629612  | 4.523390  | -1.352819 |
| 51 | 1 | 0 | -3.379515 | 5.302024  | 0.665447  |
| 52 | 1 | 0 | -1.875810 | -1.936802 | -1.545896 |
| 53 | 1 | 0 | -3.072866 | -3.490985 | 0.807057  |
| 54 | 1 | 0 | -2.838078 | -4.107344 | -0.834997 |
| 55 | 1 | 0 | -6.991383 | 1.187972  | -0.455236 |
| 56 | 1 | 0 | -2.821118 | 1.495808  | 0.649870  |
| 57 | 1 | 0 | -6.569689 | -2.261923 | -1.168159 |
| 58 | 1 | 0 | -4.391267 | 3.233554  | 0.757071  |
| 59 | 1 | 0 | -0.090161 | -3.586802 | -1.856469 |
| 60 | 1 | 0 | 2.018667  | -4.580954 | -1.016651 |
| 61 | 1 | 0 | 1.302602  | -2.831183 | 2.838768  |
| 62 | 1 | 0 | -0.821199 | -1.877286 | 2.013244  |
| 63 | 1 | 0 | 3.075090  | -4.252316 | 2.310816  |
| 64 | 1 | 0 | 1.806149  | -0.620732 | -1.393758 |

(1,2)-b

| Center<br>Number | Atomic<br>Number | Atomic<br>Type | Coordinates (Angstroms) |           |           |
|------------------|------------------|----------------|-------------------------|-----------|-----------|
|                  |                  |                | X                       | Y         | Z         |
| 1                | 8                | 0              | -1.308884               | 3.733688  | -0.063812 |
| 2                | 6                | 0              | -2.587493               | 1.093217  | 0.379380  |
| 3                | 6                | 0              | -2.241767               | 1.488513  | 1.619230  |
| 4                | 6                | 0              | -0.831419               | 1.623105  | 2.043028  |
| 5                | 6                | 0              | 1.562068                | 1.971218  | 1.460960  |
| 6                | 6                | 0              | 2.580747                | 2.499287  | 0.679262  |
| 7                | 6                | 0              | 2.248442                | 3.348996  | -0.366908 |
| 8                | 6                | 0              | 0.933525                | 3.741941  | -0.602529 |
| 9                | 6                | 0              | -0.084080               | 3.226802  | 0.191128  |
| 10               | 6                | 0              | 0.187333                | 2.273989  | 1.212569  |
| 11               | 8                | 0              | -0.526291               | 1.108613  | 3.136358  |
| 12               | 8                | 0              | 1.920572                | 1.139157  | 2.448009  |
| 13               | 8                | 0              | 3.266487                | 3.772772  | -1.166249 |
| 14               | 6                | 0              | -3.926184               | 0.741883  | -0.088180 |
| 15               | 6                | 0              | -5.017529               | 0.559160  | 0.776771  |
| 16               | 6                | 0              | -6.267384               | 0.217233  | 0.287872  |
| 17               | 6                | 0              | -6.453544               | 0.050736  | -1.089217 |
| 18               | 6                | 0              | -5.382772               | 0.226562  | -1.966974 |
| 19               | 6                | 0              | -4.133499               | 0.560426  | -1.461199 |
| 20               | 8                | 0              | -7.696882               | -0.290912 | -1.508499 |
| 21               | 1                | 0              | -1.800191               | 1.000008  | -0.369333 |
| 22               | 1                | 0              | -2.962621               | 1.532673  | 2.430659  |
| 23               | 1                | 0              | 3.609565                | 2.224151  | 0.874199  |
| 24               | 1                | 0              | 0.681885                | 4.448394  | -1.385759 |
| 25               | 1                | 0              | 1.110534                | 0.963518  | 2.985000  |
| 26               | 1                | 0              | 2.947464                | 4.413737  | -1.812816 |
| 27               | 1                | 0              | -4.890791               | 0.666432  | 1.849271  |
| 28               | 1                | 0              | -7.107554               | 0.068882  | 0.957690  |
| 29               | 1                | 0              | -5.521997               | 0.091849  | -3.035616 |
| 30               | 1                | 0              | -3.300136               | 0.680201  | -2.147517 |
| 31               | 1                | 0              | -7.713505               | -0.401077 | -2.465601 |
| 32               | 8                | 0              | 1.553453                | -1.009968 | -0.719161 |
| 33               | 6                | 0              | 1.087730                | -1.846197 | 0.356857  |
| 34               | 6                | 0              | 1.833340                | -3.178843 | 0.344751  |
| 35               | 6                | 0              | 3.325696                | -2.973937 | 0.359470  |
| 36               | 6                | 0              | 5.193773                | -1.474270 | -0.354165 |
| 37               | 6                | 0              | 5.642405                | -0.311070 | -0.964495 |
| 38               | 6                | 0              | 4.703818                | 0.583715  | -1.480699 |
| 39               | 6                | 0              | 3.330314                | 0.316215  | -1.445533 |
| 40               | 6                | 0              | 2.890277                | -0.821624 | -0.793683 |
| 41               | 6                | 0              | 3.803532                | -1.749648 | -0.239554 |
| 42               | 8                | 0              | 4.087546                | -3.833617 | 0.829977  |
| 43               | 8                | 0              | 6.094996                | -2.332744 | 0.141088  |
| 44               | 8                | 0              | 5.172826                | 1.738469  | -2.000331 |
| 45               | 6                | 0              | -0.398547               | -2.026239 | 0.204703  |
| 46               | 6                | 0              | -1.233318               | -1.951809 | 1.317401  |
| 47               | 6                | 0              | -2.598699               | -2.204147 | 1.206996  |
| 48               | 6                | 0              | -3.142660               | -2.521531 | -0.036296 |
| 49               | 6                | 0              | -2.319599               | -2.589294 | -1.162583 |

|    |   |   |           |           |           |
|----|---|---|-----------|-----------|-----------|
| 50 | 6 | 0 | -0.958585 | -2.348601 | -1.036071 |
| 51 | 8 | 0 | -4.467651 | -2.774189 | -0.216262 |
| 52 | 1 | 0 | 1.303364  | -1.316501 | 1.294960  |
| 53 | 1 | 0 | 1.580263  | -3.738705 | -0.565197 |
| 54 | 1 | 0 | 1.538420  | -3.788000 | 1.202150  |
| 55 | 1 | 0 | 6.700695  | -0.083923 | -1.005550 |
| 56 | 1 | 0 | 2.608875  | 1.011841  | -1.856369 |
| 57 | 1 | 0 | 5.595126  | -3.092408 | 0.524309  |
| 58 | 1 | 0 | 4.475716  | 2.414935  | -1.988294 |
| 59 | 1 | 0 | -0.821909 | -1.685071 | 2.287033  |
| 60 | 1 | 0 | -3.238560 | -2.131826 | 2.081947  |
| 61 | 1 | 0 | -2.759045 | -2.822065 | -2.126743 |
| 62 | 1 | 0 | -0.324201 | -2.402519 | -1.915790 |
| 63 | 1 | 0 | -4.968479 | -2.506256 | 0.562038  |
| 64 | 1 | 0 | -1.987840 | 3.286864  | 0.462641  |

(1,2)-b'

| Center<br>Number | Atomic<br>Number | Atomic<br>Type | Coordinates (Angstroms) |           |           |
|------------------|------------------|----------------|-------------------------|-----------|-----------|
|                  |                  |                | X                       | Y         | Z         |
| 1                | 8                | 0              | 0.085897                | 2.264588  | -0.114562 |
| 2                | 6                | 0              | -0.819330               | 1.307536  | 0.486215  |
| 3                | 6                | 0              | -0.577448               | 1.237291  | 1.983927  |
| 4                | 6                | 0              | 0.867009                | 0.900794  | 2.260234  |
| 5                | 6                | 0              | 3.222637                | 1.150482  | 1.461607  |
| 6                | 6                | 0              | 4.140639                | 1.660682  | 0.555271  |
| 7                | 6                | 0              | 3.672295                | 2.368603  | -0.550144 |
| 8                | 6                | 0              | 2.306898                | 2.577203  | -0.776655 |
| 9                | 6                | 0              | 1.399323                | 2.054049  | 0.129614  |
| 10               | 6                | 0              | 1.826801                | 1.341947  | 1.272974  |
| 11               | 8                | 0              | 1.200259                | 0.314478  | 3.301010  |
| 12               | 8                | 0              | 3.673733                | 0.482211  | 2.530063  |
| 13               | 8                | 0              | 4.605863                | 2.832084  | -1.410854 |
| 14               | 6                | 0              | -2.213176               | 1.660197  | 0.043349  |
| 15               | 6                | 0              | -2.537669               | 1.494769  | -1.308158 |
| 16               | 6                | 0              | -3.804118               | 1.789053  | -1.786112 |
| 17               | 6                | 0              | -4.783788               | 2.244957  | -0.900953 |
| 18               | 6                | 0              | -4.482551               | 2.407230  | 0.449890  |
| 19               | 6                | 0              | -3.199517               | 2.119512  | 0.911621  |
| 20               | 8                | 0              | -6.015092               | 2.509745  | -1.417308 |
| 21               | 1                | 0              | -0.563983               | 0.333052  | 0.052823  |
| 22               | 1                | 0              | -0.783923               | 2.205731  | 2.457601  |
| 23               | 1                | 0              | -1.222185               | 0.488083  | 2.449581  |
| 24               | 1                | 0              | 5.201910                | 1.497903  | 0.696346  |
| 25               | 1                | 0              | 1.949117                | 3.109298  | -1.651314 |
| 26               | 1                | 0              | 2.886587                | 0.235039  | 3.071959  |
| 27               | 1                | 0              | 4.190405                | 3.310854  | -2.136741 |
| 28               | 1                | 0              | -1.783942               | 1.120994  | -1.995973 |
| 29               | 1                | 0              | -4.054959               | 1.651989  | -2.832418 |
| 30               | 1                | 0              | -5.243909               | 2.752138  | 1.143965  |
| 31               | 1                | 0              | -2.993011               | 2.244226  | 1.969282  |
| 32               | 1                | 0              | -6.612681               | 2.808833  | -0.723739 |
| 33               | 6                | 0              | -4.193302               | -1.591507 | -1.054946 |
| 34               | 6                | 0              | -4.166472               | -1.271557 | 0.294894  |
| 35               | 6                | 0              | -3.039726               | -1.588692 | 1.043022  |
| 36               | 6                | 0              | -1.881597               | -2.177302 | 0.452445  |
| 37               | 6                | 0              | -1.988020               | -2.546981 | -0.909962 |
| 38               | 6                | 0              | -3.115464               | -2.242911 | -1.662972 |
| 39               | 8                | 0              | -5.316511               | -1.283133 | -1.739933 |
| 40               | 8                | 0              | -3.079091               | -1.294887 | 2.353412  |
| 41               | 8                | 0              | -0.977268               | -3.261348 | -1.460388 |
| 42               | 6                | 0              | -0.701935               | -2.408971 | 1.313230  |
| 43               | 6                | 0              | 0.691785                | -2.369475 | 0.853979  |
| 44               | 6                | 0              | 1.127942                | -1.742161 | -0.252917 |
| 45               | 6                | 0              | 2.763181                | -0.815549 | -1.839312 |
| 46               | 6                | 0              | 2.513946                | -1.528907 | -0.659216 |
| 47               | 6                | 0              | 3.617505                | -1.994011 | 0.076408  |
| 48               | 6                | 0              | 4.911856                | -1.750657 | -0.346389 |
| 49               | 6                | 0              | 5.135441                | -1.027332 | -1.522812 |
| 50               | 6                | 0              | 4.056903                | -0.565612 | -2.277303 |
| 51               | 8                | 0              | 6.426432                | -0.801961 | -1.875608 |
| 52               | 8                | 0              | -0.875920               | -2.554219 | 2.541691  |
| 53               | 1                | 0              | -5.011368               | -0.787323 | 0.767864  |

|    |   |   |           |           |           |
|----|---|---|-----------|-----------|-----------|
| 54 | 1 | 0 | -3.169417 | -2.542433 | -2.705837 |
| 55 | 1 | 0 | -5.233887 | -1.535346 | -2.665949 |
| 56 | 1 | 0 | -2.314843 | -1.760638 | 2.769155  |
| 57 | 1 | 0 | -1.198491 | -3.505568 | -2.365548 |
| 58 | 1 | 0 | 1.385875  | -2.764712 | 1.589973  |
| 59 | 1 | 0 | 0.393104  | -1.325514 | -0.937167 |
| 60 | 1 | 0 | 1.926810  | -0.439302 | -2.421974 |
| 61 | 1 | 0 | 3.468180  | -2.543278 | 0.999894  |
| 62 | 1 | 0 | 5.761588  | -2.099029 | 0.230572  |
| 63 | 1 | 0 | 4.227254  | -0.000184 | -3.188825 |
| 64 | 1 | 0 | 6.469049  | -0.271382 | -2.678679 |

(1,2)-g

| Center<br>Number | Atomic<br>Number | Atomic<br>Type | Coordinates (Angstroms) |           |           |
|------------------|------------------|----------------|-------------------------|-----------|-----------|
|                  |                  |                | X                       | Y         | Z         |
| 1                | 8                | 0              | 0.947022                | -2.317453 | -0.770995 |
| 2                | 6                | 0              | -0.237922               | -1.566394 | -0.437396 |
| 3                | 6                | 0              | -0.560798               | -0.590194 | -1.562323 |
| 4                | 6                | 0              | 0.612691                | 0.322652  | -1.806870 |
| 5                | 6                | 0              | 3.104088                | 0.437237  | -1.934623 |
| 6                | 6                | 0              | 4.342618                | -0.177861 | -1.843806 |
| 7                | 6                | 0              | 4.407986                | -1.493770 | -1.386366 |
| 8                | 6                | 0              | 3.264541                | -2.213181 | -1.020944 |
| 9                | 6                | 0              | 2.031110                | -1.592106 | -1.122676 |
| 10               | 6                | 0              | 1.913853                | -0.260748 | -1.590258 |
| 11               | 8                | 0              | 0.453846                | 1.490429  | -2.202686 |
| 12               | 8                | 0              | 3.042661                | 1.702608  | -2.370655 |
| 13               | 8                | 0              | 5.640340                | -2.038905 | -1.294780 |
| 14               | 6                | 0              | -1.349994               | -2.531810 | -0.138461 |
| 15               | 6                | 0              | -2.001359               | -2.486815 | 1.095801  |
| 16               | 6                | 0              | -3.061953               | -3.341677 | 1.376041  |
| 17               | 6                | 0              | -3.474745               | -4.265571 | 0.416592  |
| 18               | 6                | 0              | -2.824977               | -4.330856 | -0.818914 |
| 19               | 6                | 0              | -1.773431               | -3.462574 | -1.089524 |
| 20               | 8                | 0              | -4.514622               | -5.082935 | 0.738882  |
| 21               | 1                | 0              | -0.007793               | -0.997203 | 0.470722  |
| 22               | 1                | 0              | -0.762121               | -1.139002 | -2.491351 |
| 23               | 1                | 0              | -1.451724               | -0.006367 | -1.323995 |
| 24               | 1                | 0              | 5.245695                | 0.363151  | -2.095965 |
| 25               | 1                | 0              | 3.326382                | -3.225660 | -0.637406 |
| 26               | 1                | 0              | 2.090414                | 1.958026  | -2.390724 |
| 27               | 1                | 0              | 5.588750                | -2.945404 | -0.971421 |
| 28               | 1                | 0              | -1.675706               | -1.778641 | 1.853528  |
| 29               | 1                | 0              | -3.568932               | -3.305626 | 2.334398  |
| 30               | 1                | 0              | -3.140626               | -5.055038 | -1.564794 |
| 31               | 1                | 0              | -1.274057               | -3.523455 | -2.052269 |
| 32               | 1                | 0              | -4.711349               | -5.679357 | 0.008673  |
| 33               | 6                | 0              | 3.786106                | 1.682913  | 1.088175  |
| 34               | 6                | 0              | 3.534688                | 0.404770  | 1.569254  |
| 35               | 6                | 0              | 2.274964                | 0.108556  | 2.075341  |
| 36               | 6                | 0              | 1.214756                | 1.064637  | 2.065181  |
| 37               | 6                | 0              | 1.542321                | 2.370376  | 1.621828  |
| 38               | 6                | 0              | 2.800860                | 2.674406  | 1.121283  |
| 39               | 8                | 0              | 5.028116                | 1.935962  | 0.623882  |
| 40               | 8                | 0              | 2.089650                | -1.132140 | 2.552236  |
| 41               | 8                | 0              | 0.609175                | 3.342158  | 1.747644  |
| 42               | 6                | 0              | -0.114825               | 0.638819  | 2.538704  |
| 43               | 6                | 0              | -1.383458               | 1.179552  | 2.034741  |
| 44               | 6                | 0              | -1.538167               | 1.701739  | 0.805983  |
| 45               | 6                | 0              | -2.739272               | 2.550405  | -1.164804 |
| 46               | 6                | 0              | -2.790270               | 2.080237  | 0.155290  |
| 47               | 6                | 0              | -4.046869               | 1.991396  | 0.779285  |
| 48               | 6                | 0              | -5.202752               | 2.360081  | 0.112928  |
| 49               | 6                | 0              | -5.128579               | 2.827462  | -1.204622 |
| 50               | 6                | 0              | -3.892305               | 2.922868  | -1.845278 |
| 51               | 8                | 0              | -6.295071               | 3.171202  | -1.806217 |
| 52               | 8                | 0              | -0.199638               | -0.321499 | 3.335059  |
| 53               | 1                | 0              | 4.307601                | -0.353414 | 1.561206  |
| 54               | 1                | 0              | 3.026135                | 3.683777  | 0.789292  |
| 55               | 1                | 0              | 5.086583                | 2.834074  | 0.279880  |
| 56               | 1                | 0              | 1.223666                | -1.132032 | 3.022811  |
| 57               | 1                | 0              | 0.960233                | 4.182027  | 1.432231  |



|    |   |   |           |          |           |
|----|---|---|-----------|----------|-----------|
| 58 | 1 | 0 | -2.232634 | 0.954281 | 2.673584  |
| 59 | 1 | 0 | -0.652092 | 1.851121 | 0.193658  |
| 60 | 1 | 0 | -1.778305 | 2.610934 | -1.669579 |
| 61 | 1 | 0 | -4.128135 | 1.630793 | 1.799553  |
| 62 | 1 | 0 | -6.171481 | 2.291294 | 0.595920  |
| 63 | 1 | 0 | -3.830620 | 3.282894 | -2.868145 |
| 64 | 1 | 0 | -6.135155 | 3.476123 | -2.706141 |

**(1,2)-g'**

| Center<br>Number | Atomic<br>Number | Atomic<br>Type | Coordinates (Angstroms) |           |           |
|------------------|------------------|----------------|-------------------------|-----------|-----------|
|                  |                  |                | X                       | Y         | Z         |
| 1                | 8                | 0              | -4.126952               | -2.299314 | 1.546798  |
| 2                | 6                | 0              | -1.806347               | -0.876414 | 0.569420  |
| 3                | 6                | 0              | -2.391183               | 0.037492  | 1.362833  |
| 4                | 6                | 0              | -3.748127               | 0.545594  | 1.136330  |
| 5                | 6                | 0              | -5.810311               | 0.394975  | -0.253126 |
| 6                | 6                | 0              | -6.770435               | -0.316409 | -0.963799 |
| 7                | 6                | 0              | -6.812473               | -1.699843 | -0.842844 |
| 8                | 6                | 0              | -5.922360               | -2.381480 | -0.006632 |
| 9                | 6                | 0              | -4.947472               | -1.667415 | 0.677883  |
| 10               | 6                | 0              | -4.817093               | -0.262473 | 0.532338  |
| 11               | 8                | 0              | -3.971305               | 1.749720  | 1.408391  |
| 12               | 8                | 0              | -5.843725               | 1.730728  | -0.362088 |
| 13               | 8                | 0              | -7.769359               | -2.349387 | -1.540573 |
| 14               | 6                | 0              | -0.429714               | -1.363207 | 0.646097  |
| 15               | 6                | 0              | 0.496458                | -0.921853 | 1.607479  |
| 16               | 6                | 0              | 1.786614                | -1.423418 | 1.646225  |
| 17               | 6                | 0              | 2.183496                | -2.399163 | 0.724508  |
| 18               | 6                | 0              | 1.283708                | -2.852145 | -0.241999 |
| 19               | 6                | 0              | -0.004930               | -2.332529 | -0.274283 |
| 20               | 8                | 0              | 3.451269                | -2.866987 | 0.823603  |
| 21               | 1                | 0              | -2.399891               | -1.313185 | -0.231593 |
| 22               | 1                | 0              | -1.842541               | 0.558887  | 2.140100  |
| 23               | 1                | 0              | -7.492665               | 0.209686  | -1.575704 |
| 24               | 1                | 0              | -6.006652               | -3.455811 | 0.128294  |
| 25               | 1                | 0              | -5.220348               | 2.091709  | 0.305155  |
| 26               | 1                | 0              | -7.726046               | -3.298658 | -1.380652 |
| 27               | 1                | 0              | 0.209027                | -0.173495 | 2.338197  |
| 28               | 1                | 0              | 2.500900                | -1.070176 | 2.382120  |
| 29               | 1                | 0              | 1.589537                | -3.600976 | -0.966326 |
| 30               | 1                | 0              | -0.696416               | -2.688206 | -1.032859 |
| 31               | 1                | 0              | 3.642918                | -3.487501 | 0.111537  |
| 32               | 8                | 0              | 3.194811                | 1.621220  | 0.168072  |
| 33               | 6                | 0              | 2.405936                | 1.771219  | -1.020271 |
| 34               | 6                | 0              | 2.116193                | 0.413761  | -1.658096 |
| 35               | 6                | 0              | 3.362643                | -0.406332 | -1.839499 |
| 36               | 6                | 0              | 5.596997                | -0.969388 | -0.878564 |
| 37               | 6                | 0              | 6.567661                | -0.799686 | 0.097096  |
| 38               | 6                | 0              | 6.369527                | 0.172461  | 1.078506  |
| 39               | 6                | 0              | 5.233881                | 0.990225  | 1.097105  |
| 40               | 6                | 0              | 4.278465                | 0.821906  | 0.106986  |
| 41               | 6                | 0              | 4.429207                | -0.158403 | -0.900356 |
| 42               | 8                | 0              | 3.432625                | -1.281410 | -2.718970 |
| 43               | 8                | 0              | 5.766061                | -1.929011 | -1.797467 |
| 44               | 8                | 0              | 7.339205                | 0.295528  | 2.010212  |
| 45               | 6                | 0              | 1.120080                | 2.463807  | -0.643072 |
| 46               | 6                | 0              | 0.352983                | 3.082384  | -1.632760 |
| 47               | 6                | 0              | -0.915394               | 3.578012  | -1.348157 |
| 48               | 6                | 0              | -1.428293               | 3.462786  | -0.055568 |
| 49               | 6                | 0              | -0.641137               | 2.909273  | 0.954993  |
| 50               | 6                | 0              | 0.617894                | 2.400816  | 0.656039  |
| 51               | 8                | 0              | -2.691146               | 3.911925  | 0.190833  |
| 52               | 1                | 0              | 1.620889                | 0.545937  | -2.622539 |
| 53               | 1                | 0              | 7.453956                | -1.422018 | 0.107860  |
| 54               | 1                | 0              | 5.096053                | 1.755204  | 1.853244  |
| 55               | 1                | 0              | 4.967404                | -1.918560 | -2.378660 |
| 56               | 1                | 0              | 7.117376                | 0.987371  | 2.643543  |
| 57               | 1                | 0              | 0.735955                | 3.157721  | -2.647453 |
| 58               | 1                | 0              | -1.523865               | 4.031116  | -2.123722 |
| 59               | 1                | 0              | -1.024127               | 2.864735  | 1.969931  |
| 60               | 1                | 0              | 1.215054                | 1.948706  | 1.439273  |
| 61               | 1                | 0              | -3.094436               | 3.332629  | 0.861034  |

|    |   |   |           |           |           |
|----|---|---|-----------|-----------|-----------|
| 62 | 1 | 0 | -4.332003 | -3.240312 | 1.574106  |
| 63 | 1 | 0 | 1.435209  | -0.155373 | -1.013348 |
| 64 | 1 | 0 | 2.983998  | 2.389161  | -1.720900 |

**(1,2)-g''**

| Center<br>Number | Atomic<br>Number | Atomic<br>Type | Coordinates (Angstroms) |           |           |
|------------------|------------------|----------------|-------------------------|-----------|-----------|
|                  |                  |                | X                       | Y         | Z         |
| 1                | 6                | 0              | -0.367360               | 2.394103  | 0.292791  |
| 2                | 6                | 0              | -1.360505               | 1.846345  | -0.517647 |
| 3                | 6                | 0              | -1.196242               | 1.889915  | -1.902802 |
| 4                | 6                | 0              | -0.060688               | 2.459965  | -2.467666 |
| 5                | 6                | 0              | 0.925911                | 3.001292  | -1.644004 |
| 6                | 6                | 0              | 0.770040                | 2.974035  | -0.258263 |
| 7                | 6                | 0              | -2.589662               | 1.254341  | 0.120265  |
| 8                | 8                | 0              | -3.117361               | 0.250711  | -0.758284 |
| 9                | 6                | 0              | -4.241678               | -0.366312 | -0.338963 |
| 10               | 6                | 0              | -5.143532               | 0.271856  | 0.544721  |
| 11               | 6                | 0              | -4.909341               | 1.635127  | 0.965410  |
| 12               | 6                | 0              | -3.667816               | 2.293758  | 0.418549  |
| 13               | 6                | 0              | -4.481677               | -1.640907 | -0.824815 |
| 14               | 6                | 0              | -5.648039               | -2.299111 | -0.417711 |
| 15               | 6                | 0              | -6.565810               | -1.713622 | 0.455871  |
| 16               | 6                | 0              | -6.315046               | -0.434134 | 0.931847  |
| 17               | 8                | 0              | -5.690092               | 2.249847  | 1.708958  |
| 18               | 8                | 0              | -7.203971               | 0.133452  | 1.757184  |
| 19               | 8                | 0              | -5.933750               | -3.548380 | -0.845092 |
| 20               | 8                | 0              | 2.025104                | 3.535528  | -2.247803 |
| 21               | 8                | 0              | -1.478914               | -2.737101 | -1.973471 |
| 22               | 6                | 0              | -0.629589               | -2.018314 | -1.200591 |
| 23               | 6                | 0              | -0.929755               | -1.921266 | 0.151155  |
| 24               | 6                | 0              | -0.096873               | -1.170456 | 0.971924  |
| 25               | 6                | 0              | 1.107976                | -0.581094 | 0.488268  |
| 26               | 6                | 0              | 1.332859                | -0.656862 | -0.907800 |
| 27               | 6                | 0              | 0.483860                | -1.374184 | -1.742459 |
| 28               | 8                | 0              | 2.378550                | 0.020214  | -1.433636 |
| 29               | 6                | 0              | 1.973006                | 0.127389  | 1.447176  |
| 30               | 6                | 0              | 3.426018                | 0.272782  | 1.284427  |
| 31               | 6                | 0              | 4.199441                | -0.636716 | 0.669010  |
| 32               | 6                | 0              | 5.660072                | -0.641791 | 0.584551  |
| 33               | 6                | 0              | 6.470583                | 0.360828  | 1.145108  |
| 34               | 6                | 0              | 7.849719                | 0.316368  | 1.029502  |
| 35               | 6                | 0              | 8.458048                | -0.741627 | 0.344760  |
| 36               | 6                | 0              | 7.675509                | -1.749450 | -0.220210 |
| 37               | 6                | 0              | 6.292200                | -1.691425 | -0.095566 |
| 38               | 8                | 0              | -0.476624               | -1.024501 | 2.251464  |
| 39               | 8                | 0              | 9.813051                | -0.731204 | 0.264225  |
| 40               | 8                | 0              | 1.480494                | 0.576290  | 2.504424  |
| 41               | 1                | 0              | 3.711288                | -1.477306 | 0.179916  |
| 42               | 1                | 0              | 3.847388                | 1.101862  | 1.846013  |
| 43               | 1                | 0              | -1.832480               | -2.364622 | 0.553460  |
| 44               | 1                | 0              | 0.673874                | -1.406341 | -2.811629 |
| 45               | 1                | 0              | 0.126604                | -0.350333 | 2.648797  |
| 46               | 1                | 0              | -1.192654               | -2.726702 | -2.893417 |
| 47               | 1                | 0              | 6.022378                | 1.190506  | 1.682026  |
| 48               | 1                | 0              | 8.471036                | 1.091994  | 1.464157  |
| 49               | 1                | 0              | 8.142104                | -2.573222 | -0.752619 |
| 50               | 1                | 0              | 5.690150                | -2.480000 | -0.538348 |
| 51               | 1                | 0              | 10.129364               | -1.500141 | -0.222603 |
| 52               | 1                | 0              | -2.304367               | 0.752115  | 1.055582  |
| 53               | 1                | 0              | -3.939156               | 2.821291  | -0.505287 |
| 54               | 1                | 0              | -3.303717               | 3.035470  | 1.133081  |
| 55               | 1                | 0              | -7.459351               | -2.247248 | 0.755818  |
| 56               | 1                | 0              | -3.749415               | -2.113053 | -1.471841 |
| 57               | 1                | 0              | -6.876648               | 1.042310  | 1.958441  |
| 58               | 1                | 0              | -5.245066               | -3.868828 | -1.438450 |
| 59               | 1                | 0              | -0.461058               | 2.346925  | 1.374496  |
| 60               | 1                | 0              | 1.542570                | 3.379530  | 0.389233  |
| 61               | 1                | 0              | 0.073909                | 2.482816  | -3.544155 |
| 62               | 1                | 0              | -1.954175               | 1.457603  | -2.547497 |
| 63               | 1                | 0              | 2.651455                | 3.844476  | -1.584502 |
| 64               | 1                | 0              | 2.334288                | -0.002949 | -2.395445 |

**(2,1)-g''**

| Center<br>Number | Atomic<br>Number | Atomic<br>Type | Coordinates (Angstroms) |           |           |
|------------------|------------------|----------------|-------------------------|-----------|-----------|
|                  |                  |                | X                       | Y         | Z         |
| 1                | 8                | 0              | -2.854644               | -0.449114 | -1.008825 |
| 2                | 6                | 0              | -3.800363               | 0.175677  | -0.114734 |
| 3                | 6                | 0              | -4.004737               | 1.639847  | -0.486942 |
| 4                | 6                | 0              | -2.687322               | 2.367192  | -0.548905 |
| 5                | 6                | 0              | -0.299283               | 2.194220  | -1.255963 |
| 6                | 6                | 0              | 0.752882                | 1.457826  | -1.781383 |
| 7                | 6                | 0              | 0.561482                | 0.098840  | -2.016185 |
| 8                | 6                | 0              | -0.645971               | -0.548496 | -1.750584 |
| 9                | 6                | 0              | -1.695210               | 0.201114  | -1.237312 |
| 10               | 6                | 0              | -1.552987               | 1.584185  | -0.984918 |
| 11               | 8                | 0              | -2.605029               | 3.576834  | -0.285209 |
| 12               | 8                | 0              | -0.115703               | 3.497773  | -1.019948 |
| 13               | 8                | 0              | 1.635852                | -0.582079 | -2.499059 |
| 14               | 6                | 0              | -5.069435               | -0.630907 | -0.150184 |
| 15               | 6                | 0              | -5.657479               | -1.068090 | 1.037649  |
| 16               | 6                | 0              | -6.851074               | -1.782045 | 1.026514  |
| 17               | 6                | 0              | -7.466315               | -2.076204 | -0.189968 |
| 18               | 6                | 0              | -6.887591               | -1.649915 | -1.388410 |
| 19               | 6                | 0              | -5.699351               | -0.928551 | -1.360433 |
| 20               | 8                | 0              | -8.628139               | -2.784379 | -0.149116 |
| 21               | 1                | 0              | -3.371580               | 0.128911  | 0.891201  |
| 22               | 1                | 0              | -4.478432               | 1.719959  | -1.474162 |
| 23               | 1                | 0              | -4.659358               | 2.124463  | 0.240376  |
| 24               | 1                | 0              | 1.706799                | 1.929377  | -1.982696 |
| 25               | 1                | 0              | -0.772545               | -1.612743 | -1.914266 |
| 26               | 1                | 0              | -0.965054               | 3.852904  | -0.664629 |
| 27               | 1                | 0              | 1.428118                | -1.515113 | -2.626724 |
| 28               | 1                | 0              | -5.179969               | -0.849173 | 1.989022  |
| 29               | 1                | 0              | -7.307503               | -2.121528 | 1.950118  |
| 30               | 1                | 0              | -7.362833               | -1.880258 | -2.337893 |
| 31               | 1                | 0              | -5.254669               | -0.605116 | -2.297067 |
| 32               | 1                | 0              | -8.959014               | -2.940760 | -1.040046 |
| 33               | 8                | 0              | 3.897885                | 0.594062  | -1.295951 |
| 34               | 6                | 0              | 2.224953                | -0.236155 | 1.097719  |
| 35               | 6                | 0              | 2.399407                | -1.432528 | 0.508581  |
| 36               | 6                | 0              | 3.711205                | -2.029343 | 0.199721  |
| 37               | 6                | 0              | 6.170300                | -1.758426 | 0.411796  |
| 38               | 6                | 0              | 7.330658                | -0.994725 | 0.402551  |
| 39               | 6                | 0              | 7.290284                | 0.287859  | -0.135965 |
| 40               | 6                | 0              | 6.119264                | 0.802560  | -0.694321 |
| 41               | 6                | 0              | 4.957058                | 0.041505  | -0.667849 |
| 42               | 6                | 0              | 4.924777                | -1.233847 | -0.048458 |
| 43               | 8                | 0              | 3.787204                | -3.272243 | 0.266654  |
| 44               | 8                | 0              | 6.262082                | -3.003044 | 0.906502  |
| 45               | 8                | 0              | 8.445291                | 0.991713  | -0.130866 |
| 46               | 6                | 0              | 0.957775                | 0.277144  | 1.621965  |
| 47               | 6                | 0              | 0.804628                | 1.654247  | 1.828430  |
| 48               | 6                | 0              | -0.391575               | 2.187960  | 2.290730  |
| 49               | 6                | 0              | -1.455822               | 1.333648  | 2.582071  |
| 50               | 6                | 0              | -1.307363               | -0.048239 | 2.432849  |
| 51               | 6                | 0              | -0.118275               | -0.563935 | 1.945482  |
| 52               | 8                | 0              | -2.666161               | 1.782435  | 3.006183  |
| 53               | 1                | 0              | 3.083397                | 0.422497  | 1.217055  |
| 54               | 1                | 0              | 1.567598                | -2.119528 | 0.375841  |
| 55               | 1                | 0              | 8.255484                | -1.407219 | 0.786756  |
| 56               | 1                | 0              | 6.103021                | 1.768179  | -1.188269 |
| 57               | 1                | 0              | 5.404015                | -3.450419 | 0.729847  |
| 58               | 1                | 0              | 8.315922                | 1.857766  | -0.533145 |
| 59               | 1                | 0              | 1.625678                | 2.325234  | 1.593158  |
| 60               | 1                | 0              | -0.500554               | 3.261840  | 2.410824  |
| 61               | 1                | 0              | -2.128255               | -0.705219 | 2.701092  |
| 62               | 1                | 0              | -0.020982               | -1.639407 | 1.839392  |
| 63               | 1                | 0              | -2.672214               | 2.744763  | 3.057385  |
| 64               | 1                | 0              | 3.186709                | -0.039580 | -1.487363 |
